# Supplementary material for: Gold-catalyzed tandem reaction of o-alkynylphenols with diazo compounds: access to 2,3-disubstituted benzofurans
Source: Royal Society of Chemistry journal article supplement (doi:10.1039/d3ob00893b), 2023-01-01

## Supporting Information

# Gold-Catalyzed Tandem Reaction of *o*-Alkynylphenols with Diazo Compounds: Access to 2,3-Disubstituted Benzofurans

Tingzhong Huang,<sup>a</sup> Ying Shao,<sup>a</sup> Shengbiao Tang<sup>a</sup> and Jiangtao Sun<sup>a,\*</sup>

Jiangsu Key Laboratory of Advanced Catalytic Materials & Technology, School of Petrochemical  
Engineering, Changzhou University, Changzhou 213164, P. R. China

E-mail: [jtsun@cczu.edu.cn](mailto:jtsun@cczu.edu.cn)

## Table of Contents

1. General information
2. Preparation of substrates
3. General procedure A for Scheme 2
4. General procedure B for Scheme 3
5. Further exploration and control experiments for Scheme 4
6. X-ray crystallographic data
7. References
8. NMR Spectra of compounds

## General information

All of the reactions were carried out in flame-dried tube under argon atmosphere. Solvents were dried prior to use. Commercially obtained reagents were used as received. Analytical thin layer chromatography (TLC) was carried out using pre-coated (0.20 mm thickness) silica gel plates with F<sub>254</sub> indicator. For column chromatography, 200-300 mesh silica gel was used. <sup>1</sup>H NMR were recorded on Bruker 500 MHz, 400 MHz, 300 MHz spectrometer in CDCl<sub>3</sub>. <sup>13</sup>C NMR were recorded on Bruker 100 MHz or 75 MHz spectrometer in CDCl<sub>3</sub>. <sup>19</sup>F NMR were recorded on Bruker 471 MHz, 376 MHz spectrometer in CDCl<sub>3</sub>. Data for <sup>1</sup>H NMR spectra were reported relative to tetramethylsilane (TMS) as an internal standard (0 ppm), and were reported as follows: chemical shift (δ ppm), multiplicity, coupling constant (Hz) and integration. Multiplicities are denoted as follows: s = singlet, d = doublet, t = triplet, q = quartet, dd = doublet of doublets, td = triplet of doublets, dt = doublet of triplets, ddd = doublet of doublet of doublets and m = multiplet. Data for <sup>13</sup>C NMR spectra were reported relative to CDCl<sub>3</sub> as an internal standard (77.16 ppm), and were reported in terms of chemical shift (δ ppm). High resolution mass spectra (HRMS) were performed on Agilent 6540 Q-TOF or Agilent 6230A TOF mass spectrometer (ESI). Melting points were determined on a SGW X-4B melting point apparatus without correction.

## Preparation of substrates

Compounds **1** were known compounds and prepared according to the literature procedures.<sup>1</sup> The diazo compounds **2** were known compounds and prepared according to literature procedures.<sup>2</sup> **2g** is a new compound. The diazo compounds **4** were known compounds and prepared according to literature procedures.<sup>3</sup>

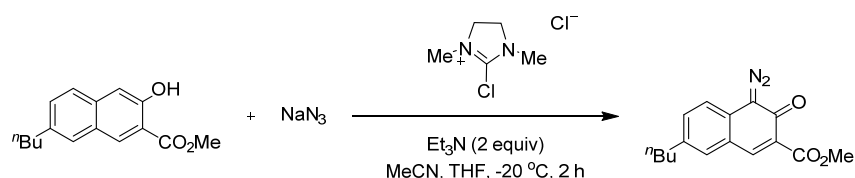

To a solution of 2-chloro-1,3-dimethylimidazolinium chloride (1.27 g, 7.5 mmol, 1.5 equiv.) in MeCN (10 mL), NaN<sub>3</sub> (553.0 mg, 8.5 mmol, 1.7 equiv.) was added at -20 °C, and the mixture was stirred for 30 min. Then 2-naphthol derivative (1.29 g, 5.0 mmol, 1.0 equiv.) and Et<sub>3</sub>N (1.4 mL, 10.0 mmol, 2.0 equiv.) in THF (10 mL) were added to the mixture, which was stirred at -20 °C for 2 h. The reaction was quenched with H<sub>2</sub>O (20 mL), and extracted with EA (50 mL). The combined organic extracts were washed with brine, dried with Na<sub>2</sub>SO<sub>4</sub>, filtrated, and evaporated under reduced pressure. The residue was purified by flash chromatography on a silica gel to afford corresponding

product **2g** (yellow solid, 1.13 g, 80%).

**methyl 7-butyl-4-diazo-3-oxo-3,4-dihydronaphthalene-2-carboxylate (2g)**

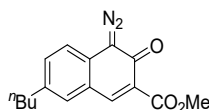

$R_f = 0.2$  (petroleum ether/ethyl acetate = 3:1)

$^1\text{H NMR}$  (500 MHz,  $\text{CDCl}_3$ )  $\delta$  8.38 (s, 1H), 7.50 (s, 1H), 7.44 (dd,  $J = 8.5, 2.0$  Hz, 1H), 7.21 (d,  $J = 8.0$  Hz, 1H), 3.94 (s, 3H), 2.69 (t,  $J = 8.0$  Hz, 2H), 1.66-1.60 (m, 2H), 1.41-1.33 (m, 2H), 0.94 (t,  $J = 7.5$  Hz, 3H).

$^{13}\text{C NMR}$  (100 MHz,  $\text{CDCl}_3$ )  $\delta$  175.9, 165.4, 145.5, 140.0, 132.8, 131.1, 126.7, 125.7, 123.8, 119.3, 79.7, 52.4, 34.9, 33.3, 22.1, 13.8.

**Mp:** 82-84 °C.

**HRMS (ESI)** calcd. For  $\text{C}_{16}\text{H}_{17}\text{N}_2\text{O}_3^+$   $[\text{M}+\text{H}]^+$   $m/z$  285.1234, found: 285.1233.

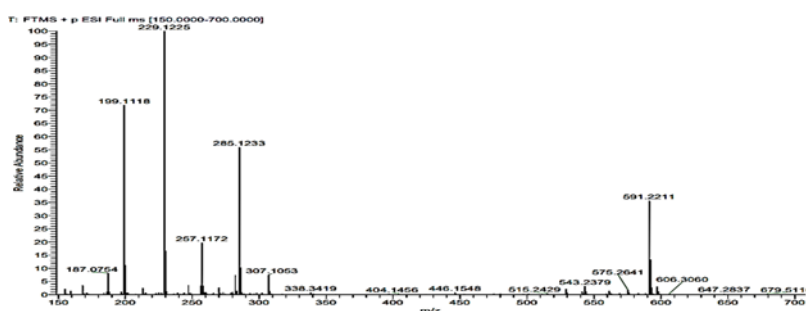

## General procedure A for Scheme 2

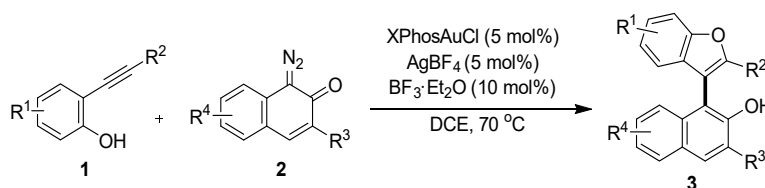

To a flame-dried tube equipped with a stirrer was added XPhosAuCl (7.1 mg, 0.01 mmol, 5 mol%), AgBF<sub>4</sub> (1.9 mg, 0.01 mmol, 5 mol%), BF<sub>3</sub>·Et<sub>2</sub>O (2.8 mg, 0.02 mmol, 10 mol%) and DCE (2 mL). The mixture was stirred at rt for 10 min under argon atmosphere, then **1** (0.4 mmol, 2.0 equiv.) and **2** (0.2 mmol, 1.0 equiv.) in 2 mL of DCE was added into the reaction mixture in one portion. The reaction was stirred at 70 °C in a heating block for 1.5 h. The reaction mixture was concentrated under vacuum, the residue was purified by silica gel column chromatography (petroleum ether/ethyl acetate = 30:1-20:1) to give **3**.

**methyl 3-hydroxy-4-(2-phenylbenzofuran-3-yl)-2-naphthoate (3a)**

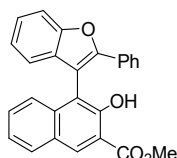

Prepared according to general procedure from 2-(phenylethynyl)phenol (77.6 mg, 0.4 mmol, 2.0 equiv.), methyl 4-diazo-3-oxo-3,4-dihydronaphthalene-2-carboxylate (45.6 mg, 0.2 mmol, 1.0 equiv.), XPhosAuCl (7.1 mg, 0.01 mmol, 5 mol%), AgBF<sub>4</sub> (1.9 mg, 0.01 mmol, 5 mol%) and BF<sub>3</sub>·Et<sub>2</sub>O (2.8 mg, 0.02 mmol, 10 mol%) in 4 mL DCE at 70 °C for 1.5 h. The residue was purified by silica gel column chromatography (petroleum ether/ethyl acetate = 20:1) to give product as a

yellow solid (52.8 mg, 67%).

$R_f = 0.4$  (petroleum ether/ethyl acetate = 20:1).

$^1\text{H NMR}$  (400 MHz,  $\text{CDCl}_3$ )  $\delta$  10.70 (s, 1H), 8.60 (s, 1H), 7.86-7.78 (m, 1H), 7.58-7.47 (m, 3H), 7.45-7.38 (m, 1H), 7.32-7.20 (m, 3H), 7.17-7.07 (m, 3H), 7.08-7.04 (m, 1H), 6.99 (d,  $J = 7.6$  Hz, 1H), 3.96 (s, 3H).

$^{13}\text{C NMR}$  (100 MHz,  $\text{CDCl}_3$ )  $\delta$  170.5, 154.6, 154.3, 152.0, 136.9, 133.2, 131.0, 130.9, 129.91, 129.88, 128.64, 128.58, 128.3, 127.3, 126.0, 125.0, 124.8, 124.3, 123.0, 120.5, 114.3, 114.1, 111.4, 110.4, 52.9.

**Mp:** 170-172 °C.

**HRMS** (ESI) calcd. For  $\text{C}_{26}\text{H}_{19}\text{O}_4^+$   $[\text{M}+\text{H}]^+$   $m/z$  395.1278, found: 395.1277.

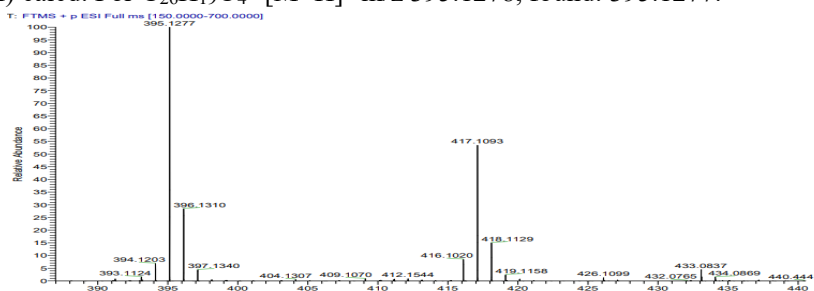

**methyl-7a-phenyl-7a,12b-dihydronaphtho[1',2':4,5]furo[2,3-b]benzofuran-6-carboxylate (3a')**

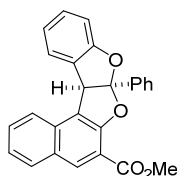

Prepared according to general procedure from 2-(phenylethynyl)phenol (77.6 mg, 0.4 mmol, 2.0 equiv.), methyl 4-diazo-3-oxo-3,4-dihydronaphthalene-2-carboxylate (45.6 mg, 0.2 mmol, 1.0 equiv.), XPhosAuCl (7.1 mg, 0.01 mmol, 5 mol%) and  $\text{AgBF}_4$  (1.9 mg, 0.01 mmol, 5 mol%) in 4 mL DCE at 70 °C for 1.5 h. The residue was purified by silica gel column chromatography (petroleum ether/ethyl acetate = 20:1) to give product as a white solid (17.3 mg, 22%).

$R_f = 0.3$  (petroleum ether/ethyl acetate = 20:1)

$^1\text{H NMR}$  (400 MHz,  $\text{CDCl}_3$ )  $\delta$  8.48 (s, 1H), 8.05-7.99 (m, 1H), 7.92 (d,  $J = 8.4$  Hz, 1H), 7.71-7.60 (m, 3H), 7.54 (d,  $J = 7.6$  Hz, 1H), 7.46-7.36 (m, 4H), 7.22 (m, 1H), 7.07 (d,  $J = 8.0$  Hz, 1H), 6.93 (td,  $J = 7.6, 0.8$  Hz, 1H), 5.42 (s, 1H), 3.99 (s, 3H).

$^{13}\text{C NMR}$  (100 MHz,  $\text{CDCl}_3$ )  $\delta$  165.5, 158.3, 154.5, 139.3, 133.6, 132.2, 130.5, 129.6, 129.4, 129.2, 128.7, 127.1, 125.2, 124.9, 124.4, 123.0, 122.8, 122.1, 121.5, 115.3, 110.8, 56.7, 52.5.

**Mp:** 192-194 °C.

**HRMS** (ESI) calcd. For  $\text{C}_{26}\text{H}_{19}\text{O}_4^+$   $[\text{M}+\text{H}]^+$   $m/z$  395.1278, found: 395.1281.

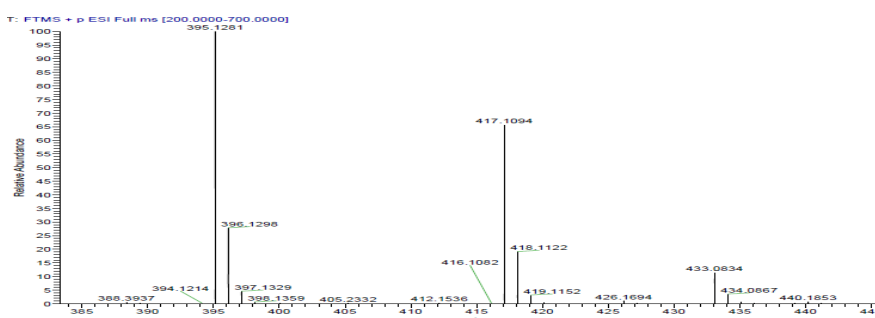

**ethyl 3-hydroxy-4-(2-phenylbenzofuran-3-yl)-2-naphthoate (3b)**

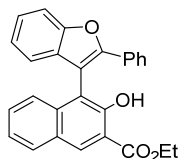

Prepared according to general procedure from 2-(phenylethynyl)phenol (77.6 mg, 0.4 mmol, 2.0 equiv.), ethyl 4-diazo-3-oxo-3,4-dihydronaphthalene-2-carboxylate (48.4 mg, 0.2 mmol, 1.0 equiv.), XPhosAuCl (7.1 mg, 0.01 mmol, 5 mol%), AgBF<sub>4</sub> (1.9 mg, 0.01 mmol, 5 mol%) and BF<sub>3</sub>·Et<sub>2</sub>O (2.8 mg, 0.02 mmol, 10 mol%) in 4 mL DCE at 70 °C for 1.5 h. The residue was purified by silica gel column chromatography (petroleum ether/ethyl acetate = 20:1) to give product as yellow solid (44.1 mg, 54%).

**R<sub>f</sub>** = 0.4 (petroleum ether/ethyl acetate = 20:1)

**<sup>1</sup>H NMR** (400 MHz, CDCl<sub>3</sub>) δ 10.87 (s, 1H), 8.74-8.63 (m, 1H), 8.02-7.87 (m, 1H), 7.69-7.56 (m, 3H), 7.51-7.49 (m, 1H), 7.38-7.27 (m, 3H), 7.20-7.16 (m, 3H), 7.14 (td, *J* = 7.6, 1.2 Hz, 1H), 7.07 (d, *J* = 7.6 Hz, 1H), 4.50 (q, *J* = 7.2 Hz, 2H), 1.50 (t, *J* = 7.2 Hz, 3H).

**<sup>13</sup>C NMR** (100 MHz, CDCl<sub>3</sub>) δ 170.1, 154.7, 154.3, 152.0, 136.8, 133.1, 131.0, 130.9, 129.84, 129.75, 128.5, 128.3, 127.2, 126.0, 124.9, 124.7, 124.2, 122.9, 120.5, 114.5, 114.0, 111.3, 110.4, 62.1, 14.4.

**Mp**: 123-125 °C.

**HRMS** (ESI) calcd. For C<sub>27</sub>H<sub>21</sub>O<sub>4</sub><sup>+</sup> [M+H]<sup>+</sup> *m/z* 409.1434, found: 409.1434.

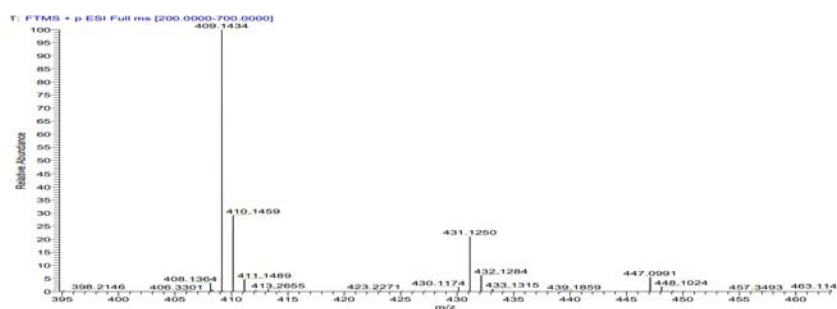

**tert-butyl 3-hydroxy-4-(2-phenylbenzofuran-3-yl)-2-naphthoate (3c)**

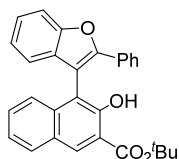

Prepared according to general procedure from 2-(phenylethynyl)phenol (77.6 mg, 0.4 mmol, 2.0 equiv.), tert-butyl 4-diazo-3-oxo-3,4-dihydronaphthalene-2-carboxylate (54.1 mg, 0.2 mmol, 1.0 equiv.), XPhosAuCl (7.1 mg, 0.01 mmol, 5 mol%), AgBF<sub>4</sub> (1.9 mg, 0.01 mmol, 5 mol%) and BF<sub>3</sub>·Et<sub>2</sub>O (2.8 mg, 0.02 mmol, 10 mol%) in 4 mL DCE at 70 °C for 1.5 h. The residue was purified by silica gel column chromatography (petroleum ether/ethyl acetate = 20:1) to give product as yellow solid (57.6 mg, 66%).

**R<sub>f</sub>** = 0.4 (petroleum ether/ethyl acetate = 20:1)

**<sup>1</sup>H NMR** (400 MHz, CDCl<sub>3</sub>) δ 11.06 (s, 1H), 8.59 (s, 1H), 8.00-7.85 (m, 1H), 7.66-7.56 (m, 3H), 7.52-7.43 (m, 1H), 7.37-7.29 (m, 3H), 7.23-7.16 (m, 3H), 7.16-7.11 (m, 1H), 7.08 (d, *J* = 7.6 Hz, 1H), 1.70 (s, 9H).

$^{13}\text{C}$  NMR (100 MHz,  $\text{CDCl}_3$ )  $\delta$  169.6, 155.1, 154.3, 152.0, 136.7, 133.1, 131.1, 131.0, 129.8, 129.6, 128.6, 128.2, 127.2, 126.0, 124.9, 124.7, 124.1, 122.9, 120.5, 115.8, 113.9, 111.4, 110.6, 83.8, 28.4.  
**Mp:** 182-184 °C.

**HRMS** (ESI) calcd. For  $\text{C}_{29}\text{H}_{25}\text{O}_4^+$   $[\text{M}+\text{H}]^+$   $m/z$  437.1747, found: 437.1744.

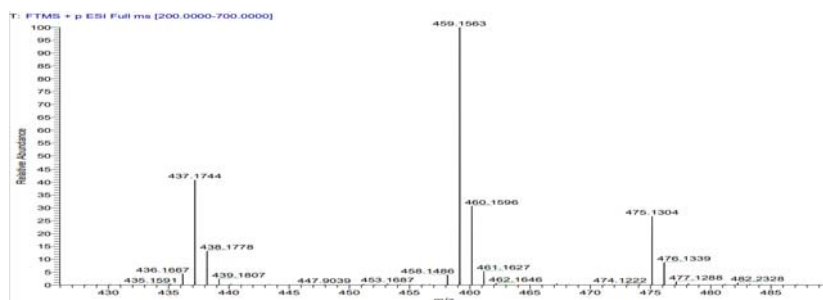

**benzyl 3-hydroxy-4-(2-phenylbenzofuran-3-yl)-2-naphthoate (3d)**

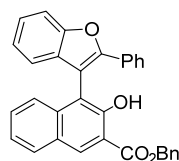

Prepared according to general procedure from 2-(phenylethynyl)phenol (77.6 mg, 0.4 mmol, 2 equiv.), benzyl 4-diazo-3-oxo-3,4-dihydronaphthalene-2-carboxylate (60.8 mg, 0.2 mmol, 1.0 equiv.), XPhosAuCl (7.1 mg, 0.01 mmol, 5 mol%),  $\text{AgBF}_4$  (1.9 mg, 0.01 mmol, 5 mol%) and  $\text{BF}_3 \cdot \text{Et}_2\text{O}$  (2.8 mg, 0.02 mmol, 10 mol%) in 4 mL DCE at 70 °C for 1.5 h. The residue was purified by silica gel column chromatography (petroleum ether/ethyl acetate = 20:1) to give product as yellow solid (38.5 mg, 41%).

$R_f$  = 0.4 (petroleum ether/ethyl acetate = 20:1)

$^1\text{H}$  NMR (400 MHz,  $\text{CDCl}_3$ )  $\delta$  10.76 (s, 1H), 8.70 (s, 1H), 7.93-7.86 (m, 1H), 7.63 (d,  $J$  = 8.0 Hz, 1H), 7.60-7.56 (m, 2H), 7.56-7.51 (m, 2H), 7.38-7.36 (m, 4H), 7.36-7.30 (m, 3H), 7.21-7.17 (m, 3 H), 7.14 (td,  $J$  = 7.6, 1.2 Hz, 1H), 7.06 (d,  $J$  = 8.0 Hz, 1H), 5.48 (s, 2H).

$^{13}\text{C}$  NMR (100 MHz,  $\text{CDCl}_3$ )  $\delta$  169.9, 154.7, 154.3, 152.1, 137.0, 135.2, 133.3, 131.0, 130.9, 129.93, 128.97, 128.93, 128.8, 128.6, 128.3, 127.3, 126.0, 125.1, 125.0, 124.8, 124.3, 123.0, 120.5, 114.3, 114.2, 111.4, 110.4, 67.7.

**Mp:** 87-89 °C.

**HRMS** (ESI) calcd. For  $\text{C}_{32}\text{H}_{23}\text{O}_4^+$   $[\text{M}+\text{H}]^+$   $m/z$  471.1591, found: 471.1593.

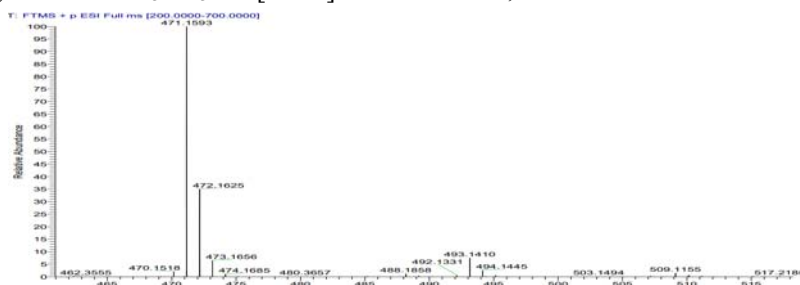

**phenyl 3-hydroxy-4-(2-phenylbenzofuran-3-yl)-2-naphthoate (3e)**

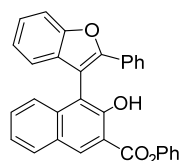

Prepared according to general procedure from 2-(phenylethynyl)phenol (77.6 mg, 0.4 mmol, 2.0 equiv.), phenyl 4-diazo-3-oxo-3,4-dihydronaphthalene-2-carboxylate (58.1 mg, 0.2 mmol, 1.0 equiv.), XPhosAuCl (7.1 mg, 0.01 mmol, 5 mol%), AgBF<sub>4</sub> (1.9 mg, 0.01 mmol, 5 mol%) and BF<sub>3</sub>·Et<sub>2</sub>O (2.8 mg, 0.02 mmol, 10 mol%) in 4 mL DCE at 70 °C for 1.5 h. The residue was purified by silica gel column chromatography (petroleum ether/ethyl acetate = 20:1) to give product as yellow solid (50.2 mg, 55%).

**R<sub>f</sub>** = 0.4 (petroleum ether/ethyl acetate = 20:1)

**<sup>1</sup>H NMR** (400 MHz, CDCl<sub>3</sub>) δ 10.47 (s, 1H), 8.94 (s, 1H), 8.01-7.93 (m, 1H), 7.66-7.57 (m, 3H), 7.56-7.51 (m, 1H), 7.51-7.44 (m, 2H), 7.42-7.26 (m, 6H), 7.23-7.18 (m, 3H), 7.18-7.13 (m, 1H), 7.12-7.07 (d, *J* = 7.6 Hz, 1H).

**<sup>13</sup>C NMR** (100 MHz, CDCl<sub>3</sub>) δ 168.8, 154.7, 154.2, 152.0, 150.2, 137.2, 133.9, 130.9, 130.8, 130.2, 130.0, 129.8, 128.5, 128.3, 127.3, 126.7, 126.0, 125.0, 124.7, 124.5, 122.9, 121.7, 120.4, 114.5, 113.7, 111.3, 110.1.

**Mp**: 84-86 °C.

**HRMS** (ESI) calcd. For C<sub>31</sub>H<sub>21</sub>O<sub>4</sub><sup>+</sup> [M+H]<sup>+</sup> *m/z* 457.1434, found: 457.1433.

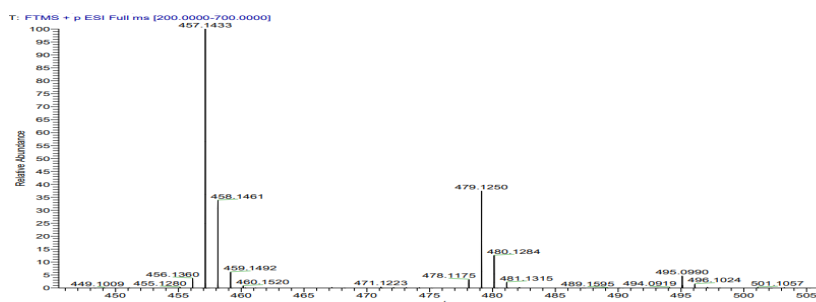

### 3-chloro-1-(2-phenylbenzofuran-3-yl)naphthalen-2-ol (3f)

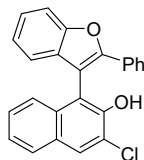

Prepared according to general procedure from 2-(phenylethynyl)phenol (77.6 mg, 0.4 mmol, 2.0 equiv.), 3-chloro-1-diazonaphthalen-2(1*H*)-one (40.9 mg, 0.2 mmol, 1.0 equiv.), XPhosAuCl (7.1 mg, 0.01 mmol, 5 mol%), AgBF<sub>4</sub> (1.9 mg, 0.01 mmol, 5 mol%) and BF<sub>3</sub>·Et<sub>2</sub>O (2.8 mg, 0.02 mmol, 10 mol%) in 4 mL DCE at 70 °C for 1.5 h. The residue was purified by silica gel column chromatography (petroleum ether/ethyl acetate = 20:1) to give product as white solid (52.6 mg, 71%).

**R<sub>f</sub>** = 0.3 (petroleum ether/ethyl acetate = 50:1)

**<sup>1</sup>H NMR** (400 MHz, CDCl<sub>3</sub>) δ 8.03 (s, 1H), 7.83-7.76 (m, 1H), 7.69-7.61 (m, 1H), 7.61-7.52 (m, 2H), 7.47 (d, *J* = 8.4 Hz, 1H), 7.41-7.32 (m, 2H), 7.30-7.26 (m, 1H), 7.25-7.21 (m, 3H), 7.17 (ddd, *J* = 8.0, 7.2, 0.8 Hz, 1H), 7.07 (d, *J* = 8.0 Hz, 1H), 5.69 (s, 1H).

**<sup>13</sup>C NMR** (100 MHz, CDCl<sub>3</sub>) δ 154.3, 152.7, 147.4, 132.1, 130.15, 130.1, 129.14, 129.1, 128.9, 128.8, 127.5, 127.3, 125.9, 125.3, 125.0, 124.8, 123.3, 122.2, 120.4, 113.3, 111.4, 108.8.

**Mp**: 126-128 °C.

**HRMS** (ESI) calcd. For C<sub>24</sub>H<sub>16</sub>ClO<sub>2</sub><sup>+</sup> [M+H]<sup>+</sup> *m/z* 371.0833, found: 371.0831.



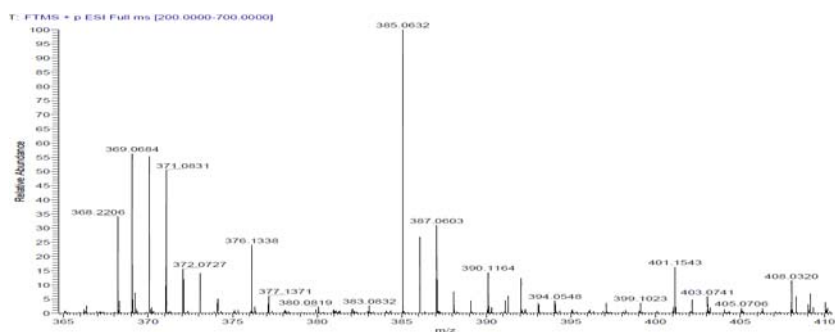

**methyl 7-butyl-3-hydroxy-4-(2-phenylbenzofuran-3-yl)-2-naphthoate (3g)**

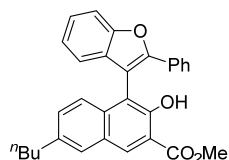

Prepared according to general procedure from 2-(phenylethynyl)phenol (77.6 mg, 0.4 mmol, 2.0 equiv.), methyl 7-butyl-4-diazo-3-oxo-3,4-dihydronaphthalene-2-carboxylate (56.8 mg, 0.2 mmol, 1.0 equiv.), XPhosAuCl (7.1 mg, 0.01 mmol, 5 mol%), AgBF<sub>4</sub> (1.9 mg, 0.01 mmol, 5 mol%) and BF<sub>3</sub>·Et<sub>2</sub>O (2.8 mg, 0.02 mmol, 10 mol%) in 4 mL DCE at 70 °C for 1.5 h. The residue was purified by silica gel column chromatography (petroleum ether/ethyl acetate = 20:1) to give product as yellow solid (60.3 mg, 67%).

R<sub>f</sub> = 0.4 (petroleum ether/ethyl acetate = 20:1)

<sup>1</sup>H NMR (400 MHz, CDCl<sub>3</sub>) δ 10.60 (s, 1H), 8.52 (s, 1H), 7.58 (s, 1H), 7.56-7.49 (m, 3H), 7.32 (d, *J* = 8.8 Hz, 1H), 7.27-7.19 (m, 1H), 7.16-7.08 (m, 4H), 7.08-7.02 (m, 1H), 7.01-6.95 (m, 1H), 3.94 (s, 3H), 2.61 (t, *J* = 7.6 Hz, 2H), 1.62-1.48 (m, 2H), 1.36-1.22 (m, 2H), 0.84 (t, *J* = 7.2 Hz, 3H).

<sup>13</sup>C NMR (100 MHz, CDCl<sub>3</sub>) δ 170.5, 154.2, 154.0, 151.9, 138.7, 135.3, 132.5, 131.6, 131.0, 130.9, 128.5, 128.2, 127.9, 127.4, 125.9, 124.8, 124.6, 122.8, 120.4, 114.1, 113.9, 111.2, 110.5, 52.8, 35.3, 33.2, 22.4, 14.0.

Mp: 178-170 °C.

HRMS (ESI) calcd. For C<sub>30</sub>H<sub>27</sub>O<sub>4</sub><sup>+</sup> [M+H]<sup>+</sup> m/z 451.1904, found: 451.1909.

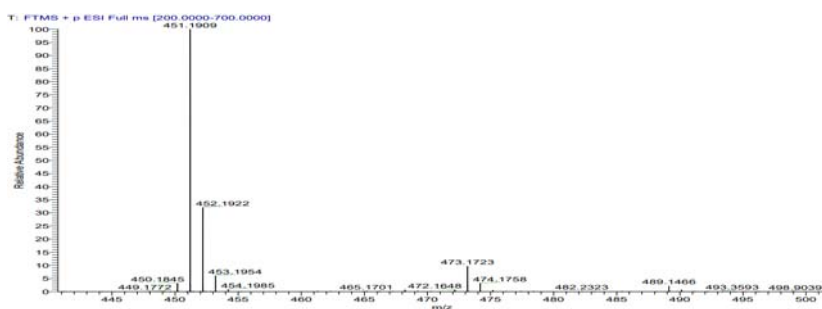

**methyl 7-bromo-3-hydroxy-4-(2-phenylbenzofuran-3-yl)-2-naphthoate (3h)**

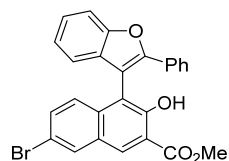

Prepared according to general procedure from 2-(phenylethynyl)phenol (77.6 mg, 0.4 mmol, 2.0 equiv.), methyl 7-bromo-4-diazo-3-oxo-3,4-dihydronaphthalene-2-carboxylate (61.4 mg, 0.2 mmol, 1.0 equiv.), XPhosAuCl (7.1 mg, 0.01 mmol, 5 mol%), AgBF<sub>4</sub> (1.9 mg, 0.01 mmol, 5 mol%) and

BF<sub>3</sub>·Et<sub>2</sub>O (2.8 mg, 0.02 mmol, 10 mol%) in 4 mL DCE at 70 °C for 1.5 h. The residue was purified by silica gel column chromatography (petroleum ether/ethyl acetate = 20:1) to give product as yellow solid (49.1 mg, 52%).

R<sub>f</sub> = 0.4 (petroleum ether/ethyl acetate = 20:1)

<sup>1</sup>H NMR (400 MHz, CDCl<sub>3</sub>) δ 10.81 (s, 1H), 8.56 (s, 1H), 8.04 (s, 1H), 7.62 (d, *J* = 8.0 Hz, 1H), 7.58-7.53 (m, 2H), 7.38 (m, 2H), 7.35-7.29 (m, 1H), 7.23-7.17 (m, 3H), 7.14 (td, *J* = 7.6, 0.8 Hz, 1H), 7.05 (d, *J* = 7.6 Hz, 1H), 4.02 (s, 3H).

<sup>13</sup>C NMR (100 MHz, CDCl<sub>3</sub>) δ 170.1, 154.9, 154.2, 152.1, 135.2, 132.9, 132.0, 131.5, 130.8, 130.6, 128.6, 128.4, 128.2, 126.8, 125.9, 124.9, 123.0, 120.3, 118.0, 115.2, 114.7, 111.4, 109.8, 53.0.

Mp: 168-170 °C.

HRMS (ESI) calcd. For C<sub>26</sub>H<sub>18</sub>BrO<sub>4</sub><sup>+</sup> [M+H]<sup>+</sup> m/z 473.0383, found: 473.0385.

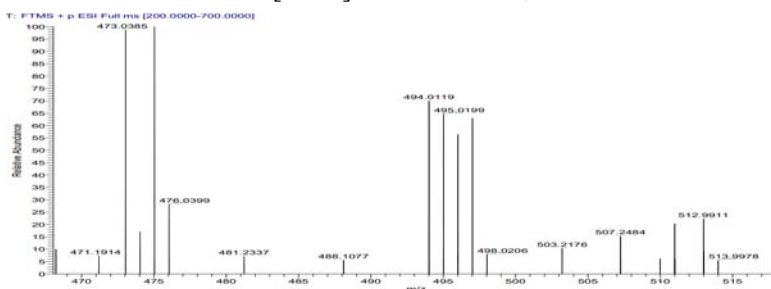

**methyl 3-hydroxy-4-(2-(*p*-tolyl)benzofuran-3-yl)-2-naphthoate (3i)**

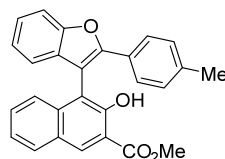

Prepared according to general procedure from 2-(*p*-tolylethynyl)phenol(83.2 mg, 0.4 mmol, 2.0 equiv.), methyl 4-diazo-3-oxo-3,4-dihydronaphthalene-2-carboxylate (45.6 mg, 0.2 mmol, 1.0 equiv.), XPhosAuCl (7.1 mg, 0.01 mmol, 5 mol%), AgBF<sub>4</sub> (1.9 mg, 0.01 mmol, 5 mol%) and BF<sub>3</sub>·Et<sub>2</sub>O (2.8 mg, 0.02 mmol, 10 mol%) in 4 mL DCE at 70 °C for 1.5 h. The residue was purified by silica gel column chromatography (petroleum ether/ethyl acetate = 20:1) to give product as yellow solid (41.6 mg, 51%).

R<sub>f</sub> = 0.4 (petroleum ether/ethyl acetate = 20:1)

<sup>1</sup>H NMR (400 MHz, CDCl<sub>3</sub>) δ 10.75 (s, 1H), 8.67 (s, 1H), 7.95-7.87 (m, 1H), 7.61 (d, *J* = 8.0 Hz, 1H), 7.53-7.43 (m, 3H), 7.39-7.26 (m, 3H), 7.17-7.09 (m, 1H), 7.05 (d, *J* = 7.8 Hz, 1H), 7.00 (d, *J* = 8.0 Hz, 2H), 4.04 (s, 3H), 2.25 (s, 3H).

<sup>13</sup>C NMR (100 MHz, CDCl<sub>3</sub>) δ 170.4, 154.5, 154.1, 152.2, 138.2, 136.9, 133.1, 130.9, 129.8, 129.7, 129.2, 128.2, 127.2, 125.8, 125.0, 124.4, 124.2, 122.8, 120.2, 114.2, 111.2, 109.5, 52.8, 21.3.

Mp: 149-151 °C.

HRMS (ESI) calcd. For C<sub>27</sub>H<sub>21</sub>O<sub>4</sub><sup>+</sup> [M+H]<sup>+</sup> m/z 409.1434, found: 409.1437.

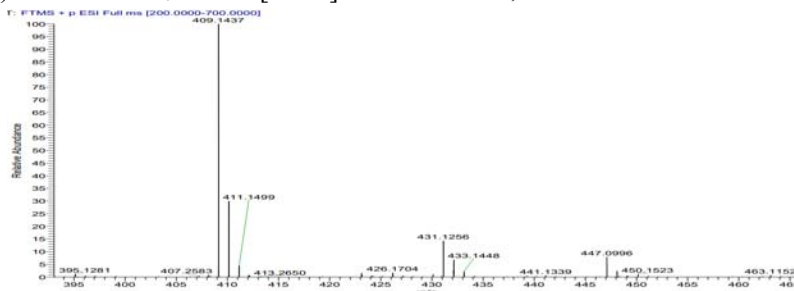

**methyl 3-hydroxy-4-(2-(4-methoxyphenyl)benzofuran-3-yl)-2-naphthoate (3j)**

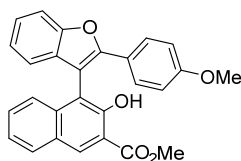

Prepared according to general procedure from 2-((4-methoxyphenyl)ethynyl)phenol (89.6 mg, 0.4 mmol, 2.0 equiv.), methyl 4-diazo-3-oxo-3,4-dihydronaphthalene-2-carboxylate (45.6 mg, 0.2 mmol, 1.0 equiv.), XPhosAuCl (7.1 mg, 0.01 mmol, 5 mol%), AgBF<sub>4</sub> (1.9 mg, 0.01 mmol, 5 mol%) and BF<sub>3</sub>·Et<sub>2</sub>O (2.8 mg, 0.02 mmol, 10 mol%) in 4 mL DCE at 70 °C for 1.5 h. The residue was purified by silica gel column chromatography (petroleum ether/ethyl acetate = 20:1) to give product as yellow solid (45.8 mg, 54%).

**R<sub>f</sub>** = 0.4 (petroleum ether/ethyl acetate = 20:1)

**<sup>1</sup>H NMR** (400 MHz, CDCl<sub>3</sub>) δ 10.75 (s, 1H), 8.68 (s, 1H), 7.95-7.87 (m, 1H), 7.63-7.56 (m, 1H), 7.56-7.47 (m, 3H), 7.41-7.32 (m, 2H), 7.34-7.25 (m, 1H), 7.20-7.09 (m, 1H), 7.07-7.00 (m, 1H), 6.77-6.69 (m, 2H), 4.06 (s, 3H), 3.73 (s, 3H).

**<sup>13</sup>C NMR** (100 MHz, CDCl<sub>3</sub>) δ 170.6, 159.7, 154.7, 154.2, 152.2, 137.0, 133.1, 131.1, 129.9, 129.8, 127.5, 127.3, 125.1, 124.3, 124.29, 123.9, 122.9, 120.2, 114.4, 114.3, 114.1, 111.2, 108.7, 55.3, 52.9.

**Mp:** 208-210 °C.

**HRMS** (ESI) calcd. For C<sub>27</sub>H<sub>21</sub>O<sub>5</sub><sup>+</sup> [M+H]<sup>+</sup> m/z 425.1384, found: 425.1384.

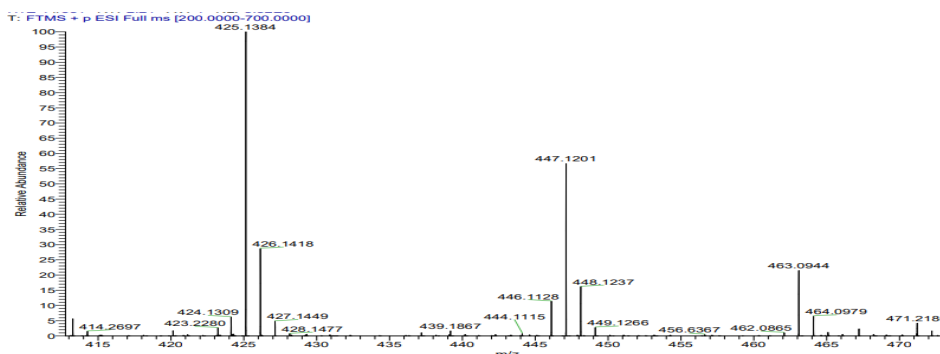

**methyl 3-hydroxy-4-(2-(o-tolyl)benzofuran-3-yl)-2-naphthoate (3k)**

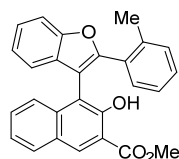

Prepared according to general procedure from 2-(o-tolyethynyl)phenol (83.2 mg, 0.4 mmol, 2.0 equiv.), methyl 4-diazo-3-oxo-3,4-dihydronaphthalene-2-carboxylate (45.6 mg, 0.2 mmol, 1.0 equiv.), XPhosAuCl (7.1 mg, 0.01 mmol, 5 mol%), AgBF<sub>4</sub> (1.9 mg, 0.01 mmol, 5 mol%) and BF<sub>3</sub>·Et<sub>2</sub>O (2.8 mg, 0.02 mmol, 10 mol%) in 4 mL DCE at 70 °C for 1.5 h. The residue was purified by silica gel column chromatography (petroleum ether/ethyl acetate = 20:1) to give product as yellow solid (45.7 mg, 56%).

**R<sub>f</sub>** = 0.3 (petroleum ether/ethyl acetate = 40:1)

**<sup>1</sup>H NMR** (400 MHz, CDCl<sub>3</sub>) δ 10.70 (s, 1H), 8.54 (s, 1H), 7.79 (d, *J* = 8.0 Hz, 1H), 7.61 (d, *J* = 8.2 Hz, 1H), 7.54 (d, *J* = 8.0 Hz, 1H), 7.38-7.30 (m, 2H), 7.30-7.23 (m, 2H), 7.21-7.09 (m, 4H), 6.99-6.90 (m, 1H), 3.97 (s, 3H), 2.39 (s, 3H).

$^{13}\text{C}$  NMR (100 MHz,  $\text{CDCl}_3$ )  $\delta$  170.5, 154.73, 154.72, 154.7, 137.8, 137.1, 132.9, 130.6, 130.5, 130.09, 130.06, 129.7, 129.4, 128.9, 127.0, 125.4, 124.9, 124.3, 123.9, 122.7, 120.6, 114.0, 113.9, 111.7, 111.4, 52.8, 20.6.

**Mp:** 90-92 °C.

**HRMS** (ESI) calcd. For  $\text{C}_{27}\text{H}_{21}\text{O}_4^+$   $[\text{M}+\text{H}]^+$   $m/z$  409.1434, found: 409.1436.

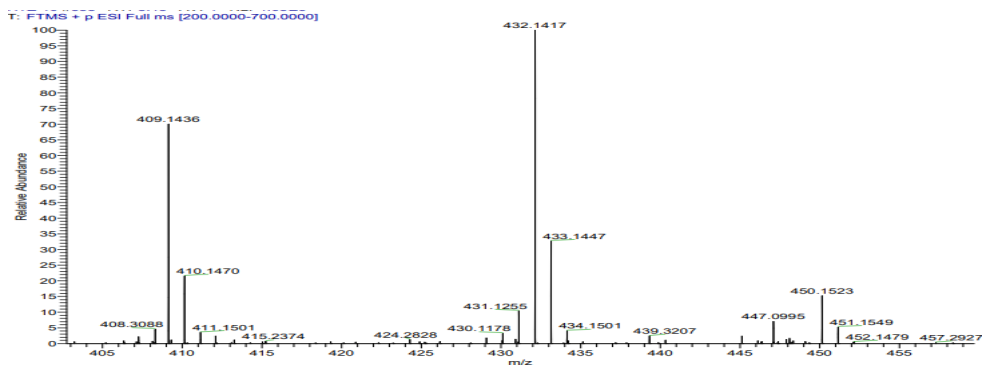

**methyl 3-hydroxy-4-(2-(m-tolyl)benzofuran-3-yl)-2-naphthoate (3l)**

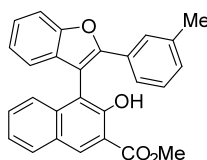

Prepared according to general procedure from 2-(*m*-tolylethynyl)phenol (83.2 mg, 0.4 mmol, 2.0 equiv.), methyl 4-diazo-3-oxo-3,4-dihydronaphthalene-2-carboxylate (45.6 mg, 0.2 mmol, 1.0 equiv.), XPhosAuCl (7.1 mg, 0.01 mmol, 5 mol%),  $\text{AgBF}_4$  (1.9 mg, 0.01 mmol, 5 mol%) and  $\text{BF}_3 \cdot \text{Et}_2\text{O}$  (2.8 mg, 0.02 mmol, 10 mol%) in 4 mL DCE at 70 °C for 1.5 h. The residue was purified by silica gel column chromatography (petroleum ether/ethyl acetate = 20:1) to give product as yellow solid (44.1 mg, 54%).

$R_f$  = 0.4 (petroleum ether/ethyl acetate = 20:1)

$^1\text{H}$  NMR (400 MHz,  $\text{CDCl}_3$ )  $\delta$  10.76 (s, 1H), 8.67 (s, 1H), 7.93-7.86 (m, 1H), 7.64-7.58 (m, 1H), 7.57-7.54 (m, 1H), 7.53-7.44 (m, 1H), 7.41-7.27 (m, 3H), 7.26-7.20 (m, 1H), 7.16-7.09 (m, 1H), 7.09-7.04 (m, 1H), 7.04-6.97 (m, 2H), 4.04 (s, 3H), 2.23 (s, 3H).

$^{13}\text{C}$  NMR (100 MHz,  $\text{CDCl}_3$ )  $\delta$  170.5, 154.5, 154.2, 152.2, 138.3, 138.0, 136.9, 133.1, 130.9, 130.8, 129.8, 129.7, 129.1, 128.4, 127.2, 126.6, 125.0, 124.6, 124.2, 123.1, 122.8, 120.4, 114.2, 111.3, 110.2, 52.8, 21.5.

**Mp:** 154-156 °C.

**HRMS** (ESI) calcd. For  $\text{C}_{27}\text{H}_{21}\text{O}_4^+$   $[\text{M}+\text{H}]^+$   $m/z$  409.1434, found: 409.1435.

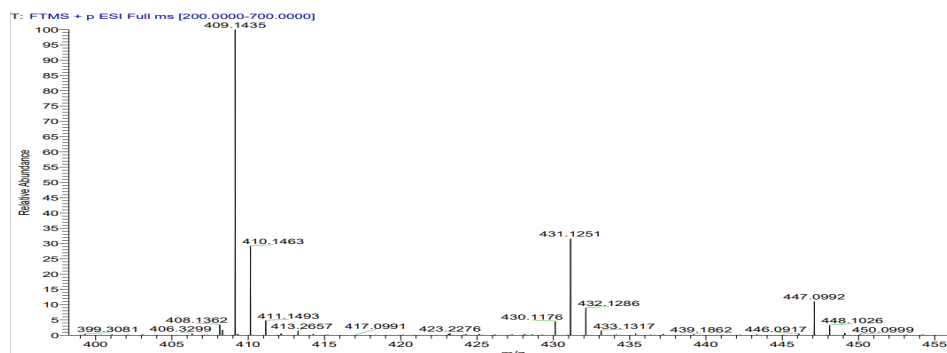

**methyl 4-(2-(3-fluorophenyl)benzofuran-3-yl)-3-hydroxy-2-naphthoate (3m)**

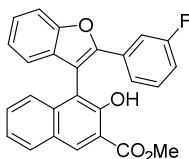

Prepared according to general procedure from 2-((3-fluorophenyl)ethynyl)phenol (84.9 mg, 0.4 mmol, 2 equiv.), methyl 4-diazo-3-oxo-3,4-dihydronaphthalene-2-carboxylate (45.6 mg, 0.2 mmol, 1.0 equiv.), XPhosAuCl (7.1 mg, 0.01 mmol, 5 mol%), AgBF<sub>4</sub> (1.9 mg, 0.01 mmol, 5 mol%) and BF<sub>3</sub>·Et<sub>2</sub>O (2.8 mg, 0.02 mmol, 10 mol%) in 4 mL DCE at 70 °C for 1.5 h. The residue was purified by silica gel column chromatography (petroleum ether/ethyl acetate = 20:1) to give product as yellow solid (34.6 mg, 42%).

**R<sub>f</sub>** = 0.4 (petroleum ether/ethyl acetate = 20:1)

**<sup>1</sup>H NMR** (400 MHz, CDCl<sub>3</sub>) δ 10.81 (s, 1H), 8.69 (s, 1H), 7.96-7.86 (m, 1H), 7.68-7.58 (m, 1H), 7.52-7.43 (m, 1H), 7.41-7.26 (m, 5H), 7.19-7.10 (m, 2H), 7.10-7.04 (m, 1H), 6.92-6.84 (m, 1H), 4.05 (s, 3H).

**<sup>13</sup>C NMR** (100 MHz, CDCl<sub>3</sub>) δ 170.5, 162.9 (d, *J* = 243.3 Hz), 154.6, 154.3, 150.7 (d, *J* = 3.2 Hz), 136.8, 133.5, 133.1 (d, *J* = 8.5 Hz), 130.7, 130.2 (d, *J* = 8.3 Hz), 130.0, 127.3, 125.2, 124.8, 124.4, 123.1, 121.6 (d, *J* = 2.9 Hz), 120.7, 115.3, 115.0, 114.3, 113.6, 112.9, 112.7, 111.5, 111.4, 53.0.

**<sup>19</sup>F NMR** (376 MHz, CDCl<sub>3</sub>) δ -112.8.

**Mp:** 190-192 °C.

**HRMS** (ESI) calcd. For C<sub>26</sub>H<sub>18</sub>FO<sub>4</sub><sup>+</sup> [M+H]<sup>+</sup> *m/z* 413.1184, found: 413.1186.

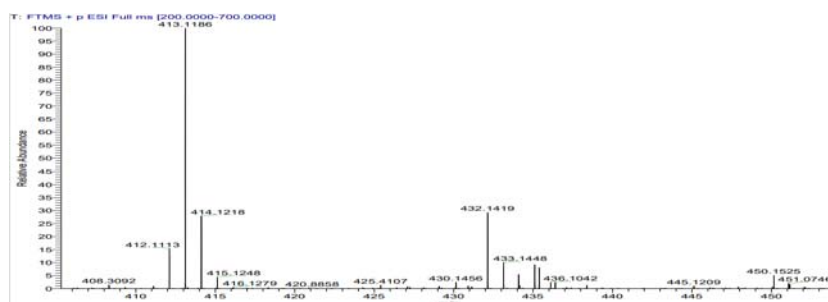

**methyl 4-(2-(cyclopropyl)benzofuran-3-yl)-3-hydroxy-2-naphthoate (3n)**

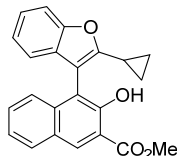

Prepared according to general procedure from 2-(cyclopropylethynyl)phenol (63.3 mg, 0.4 mmol, 2 equiv.), methyl 4-diazo-3-oxo-3,4-dihydronaphthalene-2-carboxylate (45.6 mg, 0.2 mmol, 1.0 equiv.), XPhosAuCl (7.1 mg, 0.01 mmol, 5 mol%), AgBF<sub>4</sub> (1.9 mg, 0.01 mmol, 5 mol%) and BF<sub>3</sub>·Et<sub>2</sub>O (2.8 mg, 0.02 mmol, 10 mol%) in 4 mL DCE at 70 °C for 1.5 h. The residue was purified by silica gel column chromatography (petroleum ether/ethyl acetate = 20:1) to give product as yellow solid (35.8 mg, 50%).

**R<sub>f</sub>** = 0.4 (petroleum ether/ethyl acetate = 20:1)

**<sup>1</sup>H NMR** (400 MHz, CDCl<sub>3</sub>) δ 10.75 (s, 1H), 8.54 (s, 1H), 7.80 (d, *J* = 8.4 Hz, 1H), 7.57 (d, *J* = 8.4 Hz, 1H), 7.40-7.32 (m, 2H), 7.27 (m, 1H), 7.17-7.08 (m, 1H), 7.07-6.96 (m, 2H), 3.96 (s, 3H), 1.69 (m, 1H), 1.13-1.05 (m, 1H), 1.05-0.96 (m, 1H), 0.79 (m, 2H).

$^{13}\text{C}$  NMR (100 MHz,  $\text{CDCl}_3$ )  $\delta$  170.7, 157.1, 154.7, 153.8, 137.3, 132.7, 130.3, 129.9, 129.4, 127.2, 125.5, 124.0, 123.2, 122.5, 119.8, 114.1, 113.8, 110.9, 109.1, 52.9, 9.2, 7.4, 7.3.

Mp: 149-151  $^\circ\text{C}$ .

HRMS (ESI) calcd. For  $\text{C}_{23}\text{H}_{19}\text{O}_4^+$   $[\text{M}+\text{H}]^+$   $m/z$  359.1278, found: 359.1278.

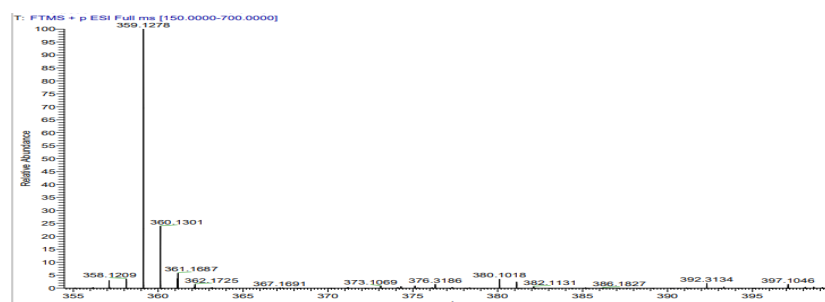

**methyl 4-(2-butylbenzofuran-3-yl)-3-hydroxy-2-naphthoate(3o)**

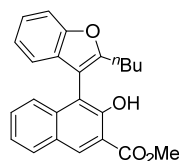

Prepared according to general procedure from 2-(hex-1-yn-1-yl)phenol (69.6 mg, 0.4 mmol, 2 equiv.), methyl 4-diazo-3-oxo-3,4-dihydronaphthalene-2-carboxylate (45.6 mg, 0.2 mmol, 1.0 equiv.), XPhosAuCl (7.1 mg, 0.01 mmol, 5 mol%),  $\text{AgBF}_4$  (1.9 mg, 0.01 mmol, 5 mol%) and  $\text{BF}_3 \cdot \text{Et}_2\text{O}$  (2.8 mg, 0.02 mmol, 10 mol%) in 4 mL DCE at 70  $^\circ\text{C}$  for 1.5 h. The residue was purified by silica gel column chromatography (petroleum ether/ethyl acetate = 20:1) to give product as yellow oil (40.6 mg, 57%).

$R_f$  = 0.5 (petroleum ether/ethyl acetate = 30:1)

$^1\text{H}$  NMR (400 MHz,  $\text{CDCl}_3$ )  $\delta$  10.79 (s, 1H), 8.62 (s, 1H), 7.88 (d,  $J$  = 8.0 Hz, 1H), 7.53 (d,  $J$  = 8.0 Hz, 2H), 7.41 (t,  $J$  = 7.2 Hz, 1H), 7.35 (t,  $J$  = 7.2 Hz, 1H), 7.24-7.22 (m, 1H), 7.12 (t,  $J$  = 7.6 Hz, 1H), 7.06 (d,  $J$  = 7.6 Hz, 1H), 4.05 (s, 3H), 2.64 (t,  $J$  = 7.6 Hz, 2H), 1.94-1.55 (m, 2H), 1.35-1.12 (m, 2H), 0.78 (t,  $J$  = 7.2 Hz, 3H).

$^{13}\text{C}$  NMR (100 MHz,  $\text{CDCl}_3$ )  $\delta$  170.7, 157.5, 154.5, 154.4, 137.2, 132.7, 129.9, 129.8, 129.3, 127.0, 125.2, 124.0, 123.3, 122.4, 120.0, 114.0, 113.8, 111.0, 109.4, 52.8, 29.7, 27.2, 22.4, 13.8.

HRMS (ESI) calcd. For  $\text{C}_{24}\text{H}_{23}\text{O}_4^+$   $[\text{M}+\text{H}]^+$   $m/z$  375.1591, found: 375.1588.

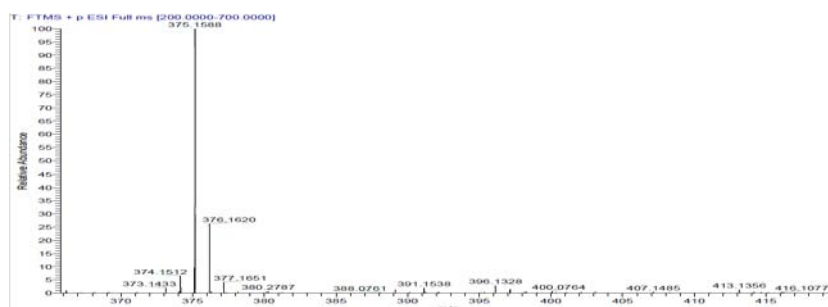

**methyl 4-(2-(tert-butyl)benzofuran-3-yl)-3-hydroxy-2-naphthoate(3p)**

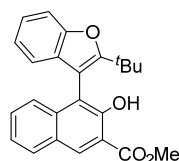

Prepared according to general procedure from 2-(3,3-dimethylbut-1-yn-1-yl)phenol (69.6 mg, 0.4 mmol, 2 equiv.), methyl 4-diazo-3-oxo-3,4-dihydronaphthalene-2-carboxylate (45.6 mg, 0.2 mmol, 1.0 equiv.), XPhosAuCl (7.1 mg, 0.01 mmol, 5 mol%), AgBF<sub>4</sub> (1.9 mg, 0.01 mmol, 5 mol%) and BF<sub>3</sub>·Et<sub>2</sub>O (2.8 mg, 0.02 mmol, 10 mol%) in 4 mL DCE at 70 °C for 1.5 h. The residue was purified by silica gel column chromatography (petroleum ether/ethyl acetate = 20:1) to give product as yellow solid (38.2 mg, 51%).

**R<sub>f</sub>** = 0.5 (petroleum ether/ethyl acetate = 30:1)

**<sup>1</sup>H NMR** (400 MHz, CDCl<sub>3</sub>) δ 10.74 (s, 1H), 8.57 (s, 1H), 7.85 (d, *J* = 8.0 Hz, 1H), 7.62 (d, *J* = 8.0 Hz, 1H), 7.53 (d, *J* = 8.6 Hz, 1H), 7.47 (s, 1H), 7.43-7.36 (m, 1H), 7.36-7.29 (m, 1H), 7.19 (dd, *J* = 8.0, 1.3 Hz, 1H), 6.43 (d, *J* = 0.8 Hz, 1H), 4.05 (s, 3H), 1.40 (s, 9H).

**<sup>13</sup>C NMR** (100 MHz, CDCl<sub>3</sub>) δ 170.8, 168.0, 154.9, 153.3, 137.3, 132.1, 130.4, 129.6, 129.2, 128.5, 127.0, 125.3, 124.3, 123.9, 120.4, 113.9, 113.2, 99.1, 52.9, 33.2, 29.0.

**Mp**: 79-81 °C.

**HRMS** (ESI) calcd. For C<sub>24</sub>H<sub>23</sub>O<sub>4</sub><sup>+</sup> [M+H]<sup>+</sup> *m/z* 375.1591, found: 375.1589.

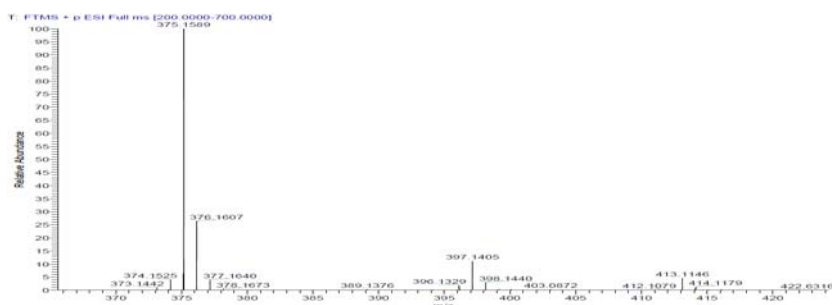

**methyl 3-hydroxy-4-(5-methyl-2-phenylbenzofuran-3-yl)-2-naphthoate (3q)**

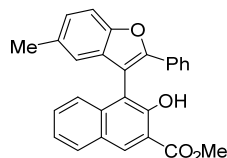

Prepared according to general procedure from 4-methyl-2-(phenylethynyl)phenol (83.2 mg, 0.4 mmol, 2 equiv.), methyl 4-diazo-3-oxo-3,4-dihydronaphthalene-2-carboxylate (45.6 mg, 0.2 mmol, 1.0 equiv.), XPhosAuCl (7.1 mg, 0.01 mmol, 5 mol%), AgBF<sub>4</sub> (1.9 mg, 0.01 mmol, 5 mol%) and BF<sub>3</sub>·Et<sub>2</sub>O (2.8 mg, 0.02 mmol, 10 mol%) in 4 mL DCE at 70 °C for 1.5 h. The residue was purified by silica gel column chromatography (petroleum ether/ethyl acetate = 20:1) to give product as yellow solid (45.7 mg, 56%).

**R<sub>f</sub>** = 0.4 (petroleum ether/ethyl acetate = 20:1)

**<sup>1</sup>H NMR** (400 MHz, CDCl<sub>3</sub>) δ 10.69 (s, 1H), 8.55 (s, 1H), 7.86-7.75 (m, 1H), 7.68-7.59 (m, 1H), 7.57-7.51 (m, 1H), 7.38-7.30 (m, 2H), 7.30-7.25 (m, 2H), 7.22-7.07 (m, 4H), 7.01-6.90 (m, 1H), 4.00 (s, 3H), 2.39 (s, 3H).

**<sup>13</sup>C NMR** (100 MHz, CDCl<sub>3</sub>) δ 170.5, 154.69, 154.67, 137.8, 137.0, 132.8, 130.5, 130.47, 130.1, 130.0, 129.7, 129.3, 128.9, 127.0, 125.4, 124.9, 124.2, 123.9, 122.7, 120.6, 114.0, 113.9, 111.7, 111.4, 52.7, 20.5.

**Mp**: 105-107 °C.

**HRMS** (ESI) calcd. For C<sub>27</sub>H<sub>21</sub>O<sub>4</sub><sup>+</sup> [M+H]<sup>+</sup> *m/z* 409.1434, found: 409.1434.

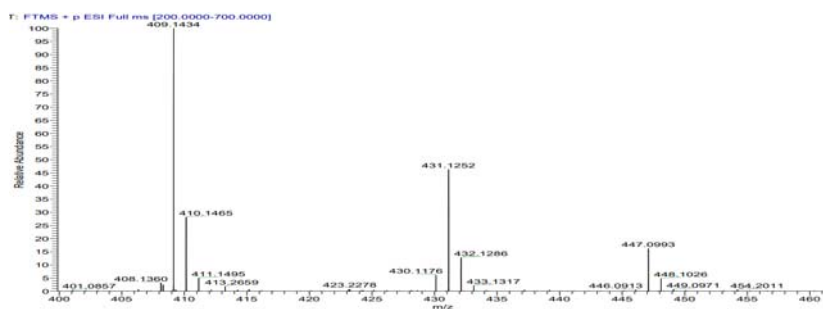

***methyl 4-(2,5-diphenylbenzofuran-3-yl)-3-hydroxy-2-naphthoate (3r)***

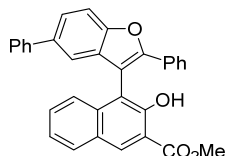

Prepared according to general procedure from 3-(phenylethynyl)-[1,1'-biphenyl]-4-ol (108.0 mg, 0.4 mmol, 2 equiv.), methyl 4-diazo-3-oxo-3,4-dihydronaphthalene-2-carboxylate (45.6 mg, 0.2 mmol, 1.0 equiv.), XPhosAuCl (7.1 mg, 0.01 mmol, 5 mol%), AgBF<sub>4</sub> (1.9 mg, 0.01 mmol, 5 mol%) and BF<sub>3</sub>·Et<sub>2</sub>O (2.8 mg, 0.02 mmol, 10 mol%) in 4 mL DCE at 70 °C for 1.5 h. The residue was purified by silica gel column chromatography (petroleum ether/ethyl acetate = 20:1) to give product as yellow solid (62.0 mg, 66%).

**R<sub>f</sub>** = 0.4 (petroleum ether/ethyl acetate = 20:1)

**<sup>1</sup>H NMR** (400 MHz, CDCl<sub>3</sub>) δ 10.79 (s, 1H), 8.70 (s, 1H), 7.97-7.88 (m, 1H), 7.71-7.66 (m, 1H), 7.62-7.51 (m, 4H), 7.51-7.46 (m, 2H), 7.40-7.30 (m, 4H), 7.28-7.18 (m, 5H), 4.06 (s, 3H).

**<sup>13</sup>C NMR** (100 MHz, CDCl<sub>3</sub>) δ 170.4, 154.6, 153.9, 152.6, 141.7, 136.8, 136.7, 133.2, 131.3, 130.9, 129.9, 129.8, 128.6, 128.5, 128.3, 127.5, 127.2, 126.8, 125.9, 124.9, 124.4, 124.3, 118.8, 114.3, 113.9, 111.4, 110.5, 52.9.

**Mp:** 98-100 °C.

**HRMS** (ESI) calcd. For C<sub>32</sub>H<sub>23</sub>O<sub>4</sub><sup>+</sup> [M+H]<sup>+</sup> m/z 471.1591, found: 471.1591.

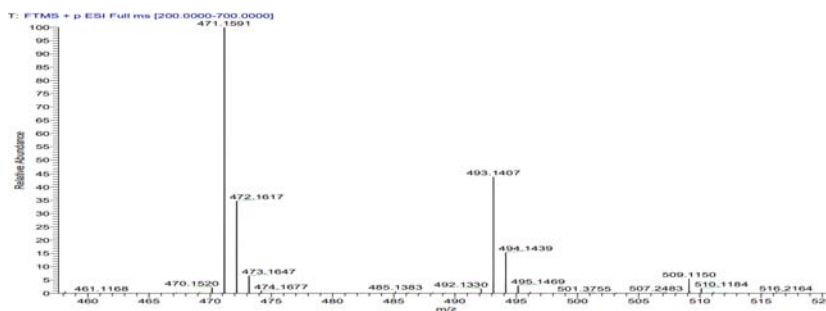

***methyl 4-(5-fluoro-2-phenylbenzofuran-3-yl)-3-hydroxy-2-naphthoate (3s)***

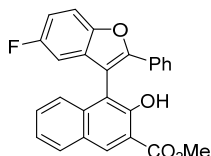

Prepared according to general procedure from 4-fluoro-2-(phenylethynyl)phenol (84.8 mg, 0.4 mmol, 2 equiv.), methyl 4-diazo-3-oxo-3,4-dihydronaphthalene-2-carboxylate (45.6 mg, 0.2 mmol, 1.0 equiv.), XPhosAuCl (7.1 mg, 0.01 mmol, 5 mol%), AgBF<sub>4</sub> (1.9 mg, 0.01 mmol, 5 mol%) and BF<sub>3</sub>·Et<sub>2</sub>O (2.8 mg, 0.02 mmol, 10 mol%) in 4 mL DCE at 70 °C for 1.5 h. The residue was purified



by silica gel column chromatography (petroleum ether/ethyl acetate = 20:1) to give product as yellow solid (29.6 mg, 36%).

$R_f = 0.4$  (petroleum ether/ethyl acetate = 20:1)

$^1\text{H NMR}$  (400 MHz,  $\text{CDCl}_3$ )  $\delta$  10.81 (s, 1H), 8.69 (s, 1H), 7.99-7.83 (m, 1H), 7.62-7.51 (m, 3H), 7.50-7.43 (m, 1H), 7.42-7.31 (m, 2H), 7.24-7.17 (m, 3H), 7.08-6.99 (m, 1H), 6.76-6.68 (m, 1H), 4.05 (s, 3H).

$^{13}\text{C NMR}$  (100 MHz,  $\text{CDCl}_3$ )  $\delta$  170.4, 159.5 (d,  $J = 237.1$  Hz), 154.6, 153.8, 150.4, 136.6, 133.4, 131.8 (d,  $J = 10.4$  Hz), 130.6, 129.9 (d,  $J = 3.2$  Hz), 128.5, 127.2, 126.0, 124.7, 124.3, 114.2, 113.4, 112.5, 112.2, 111.9 (d,  $J = 9.4$  Hz), 110.5 (d,  $J = 4.1$  Hz), 106.0, 105.8, 52.9.

$^{19}\text{F NMR}$  (376 MHz,  $\text{CDCl}_3$ )  $\delta$  -120.7.

**Mp:** 199-201 °C.

**HRMS** (ESI) calcd. For  $\text{C}_{26}\text{H}_{18}\text{FO}_4^+$   $[\text{M}+\text{H}]^+$   $m/z$  413.1184, found: 413.1186.

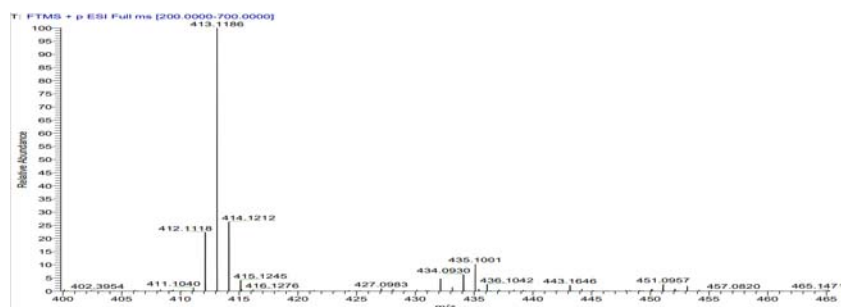

### General procedure B for Scheme 3

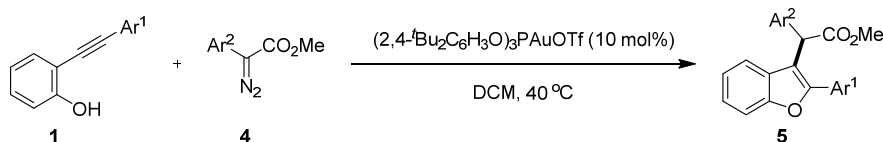

To a dry tube was added  $(2,4\text{-}^t\text{Bu}_2\text{C}_6\text{H}_3\text{O})_3\text{PAuOTf}$  (19.9 mg, 0.02 mmol, 10 mol%), **1** (0.2 mmol, 1.0 equiv.) and DCM (2 mL). Then a solution of **4** (0.24 mmol, 1.2 equiv.) in DCM (2 mL) was added via a syringe pump over 2 h under argon atmosphere. The reaction mixture was stirred at 40 °C in a heating block for 1 h. The reaction mixture was concentrated. The residue was purified by silica gel chromatography (eluent: EtOAc/Petroleum ether = 1:30-1:10) to give desired product.

#### *methyl 2-phenyl-2-(2-phenylbenzofuran-3-yl)acetate (5a)*

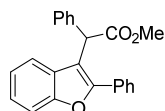

Prepared according to general procedure from 2-(phenylethynyl)phenol (38.8 mg, 0.2 mmol, 1.0 equiv.), methyl 2-diazo-2-phenylacetate (42.2 mg, 0.24 mmol, 1.2 equiv.),  $(2,4\text{-}^t\text{Bu}_2\text{C}_6\text{H}_3\text{O})_3\text{PAuOTf}$  (19.9 mg, 0.02 mmol, 10 mol%) in 4 mL DCM at 40 °C for 3 h. The residue was purified by silica gel column chromatography (petroleum ether/ethyl acetate = 20:1) to give product as white solid (48.6 mg, 71%).

$R_f = 0.5$  (petroleum ether/ethyl acetate = 10:1)

$^1\text{H NMR}$  (300 MHz,  $\text{CDCl}_3$ )  $\delta$  7.74-7.66 (m, 2H), 7.54-7.36 (m, 5H), 7.34-7.21 (m, 6H), 7.21-7.13

(m, 1H), 5.51 (s, 1H), 3.71 (s, 3H).

$^{13}\text{C}$  NMR (75 MHz,  $\text{CDCl}_3$ )  $\delta$  172.5, 154.4, 153.6, 137.3, 130.3, 129.1, 128.9, 128.7, 128.6, 128.3, 128.1, 127.4, 124.6, 122.9, 122.0, 112.5, 111.3, 52.5, 47.8.

**Mp:** 128-130 °C.

**HRMS** (ESI) calcd. For  $\text{C}_{23}\text{H}_{19}\text{O}_3^+$   $[\text{M}+\text{H}]^+$   $m/z$  343.1329, found: 343.1331.

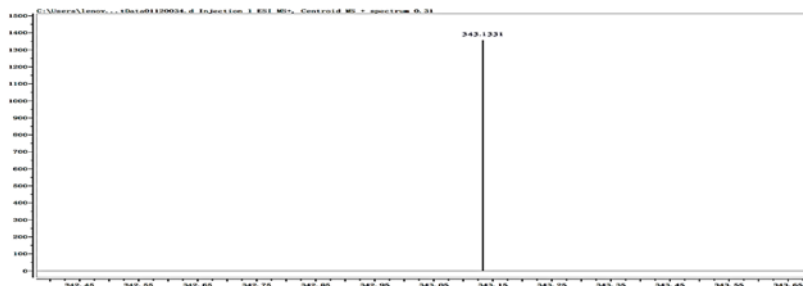

**methyl 2-phenyl-2-(2-(p-tolyl)benzofuran-3-yl)acetate (5b)**

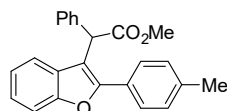

Prepared according to general procedure from 2-(p-tolylolethynyl)phenol (41.6 mg, 0.2 mmol, 1.0 equiv.), methyl 2-diazo-2-phenylacetate (42.2 mg, 0.24 mmol, 1.2 equiv.),  $(2,4\text{-}^t\text{Bu}_2\text{C}_6\text{H}_3\text{O})_3\text{PAuOTf}$  (19.9 mg, 0.02 mmol, 10 mol%) in 4 mL DCM at 40 °C for 3 h. The residue was purified by silica gel column chromatography (petroleum ether/ethyl acetate = 20:1) to give product as a white solid (42.7 mg, 60%).

**R<sub>f</sub>** = 0.3 (petroleum ether/ethyl acetate = 20:1)

$^1\text{H}$  NMR (400 MHz,  $\text{CDCl}_3$ )  $\delta$  7.59 (d,  $J$  = 8.0 Hz, 2H), 7.49 (t,  $J$  = 7.8 Hz, 2H), 7.31-7.19 (m, 8H), 7.15 (t,  $J$  = 7.6 Hz, 1H), 5.47 (s, 1H), 3.79 (s, 3H), 3.69 (s, 3H).

$^{13}\text{C}$  NMR (100 MHz,  $\text{CDCl}_3$ )  $\delta$  172.6, 154.4, 153.9, 139.2, 137.4, 129.6, 128.69, 128.66, 128.3, 128.0, 127.42, 127.37, 124.4, 122.9, 121.9, 111.9, 111.3, 52.5, 47.9, 21.5.

**Mp:** 133-135 °C.

**HRMS** (ESI) calcd. For  $\text{C}_{24}\text{H}_{21}\text{O}_3^+$   $[\text{M}+\text{H}]^+$   $m/z$  357.1485, found: 357.1484.

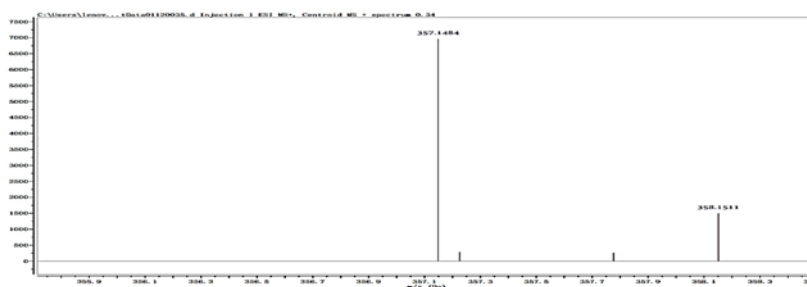

**methyl 2-(2-(4-methoxyphenyl)benzofuran-3-yl)-2-phenylacetate (5c)**

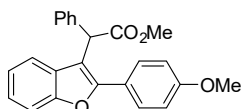

Prepared according to general procedure from 2-((4-methoxyphenyl)ethynyl)phenol (44.8 mg, 0.2 mmol, 1.0 equiv.), methyl 2-diazo-2-phenylacetate (42.2 mg, 0.24 mmol, 1.2 equiv.),  $(2,4\text{-}$

$\text{Bu}_2\text{C}_6\text{H}_3\text{O}_3\text{PAuOTf}$  (19.9 mg, 0.02 mmol, 10 mol%) in 4 mL DCM at 40 °C for 3 h. The residue was purified by silica gel column chromatography (petroleum ether/ethyl acetate = 20:1) to give product as a colorless oil (40.9 mg, 55%).

$R_f$  = 0.4 (petroleum ether/ethyl acetate = 20:1)

$^1\text{H NMR}$  (400 MHz,  $\text{CDCl}_3$ )  $\delta$  7.63 (d,  $J$  = 7.6 Hz, 2H), 7.51-7.46 (m, 2H), 7.33-7.21 (m, 6H), 7.19-7.12 (m, 1H), 6.97 (d,  $J$  = 7.6 Hz, 2H), 5.47 (s, 1H), 3.79 (s, 3H), 3.69 (s, 3H).

$^{13}\text{C NMR}$  (100 MHz,  $\text{CDCl}_3$ )  $\delta$  172.6, 160.3, 154.3, 153.8, 137.4, 129.5, 128.73, 128.65, 128.3, 127.4, 124.2, 122.82, 122.75, 121.7, 114.3, 111.3, 111.2, 55.4, 52.5, 47.9.

**HRMS** (ESI) calcd. For  $\text{C}_{24}\text{H}_{21}\text{O}_4^+$   $[\text{M}+\text{H}]^+$   $m/z$  373.1434, found: 373.1435.

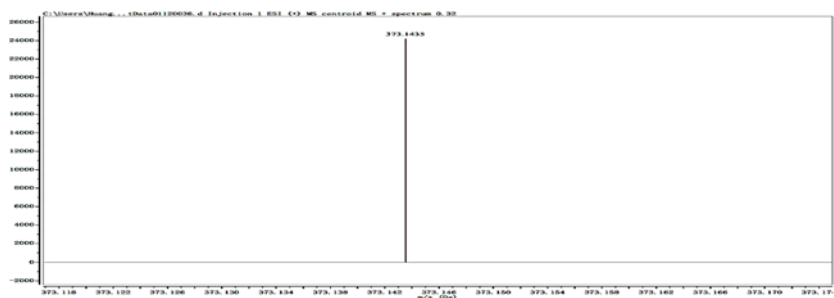

**methyl 2-(2-(naphthalen-2-yl)benzofuran-3-yl)-2-phenylacetate (5d)**

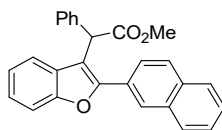

Prepared according to general procedure from 2-(naphthalen-2-ylethynyl)phenol (48.8 mg, 0.2 mmol, 1.0 equiv.), methyl 2-diazo-2-phenylacetate (42.2 mg, 0.24 mmol, 1.2 equiv.), (2,4- $\text{Bu}_2\text{C}_6\text{H}_3\text{O}_3\text{PAuOTf}$  (19.9 mg, 0.02 mmol, 10 mol%) in 4 mL DCM at 40 °C for 3 h. The residue was purified by silica gel column chromatography (petroleum ether/ethyl acetate = 20:1) to give product as a white solid (41.6 mg, 53%).

$R_f$  = 0.4 (petroleum ether/ethyl acetate = 20:1)

$^1\text{H NMR}$  (300 MHz,  $\text{CDCl}_3$ )  $\delta$  8.16 (d,  $J$  = 1.2 Hz, 1H), 7.92 (d,  $J$  = 8.4 Hz, 4H), 7.87-7.81 (m, 4H), 7.36-7.25 (m, 6H), 7.22-7.16 (m, 1H), 5.61 (s, 1H), 3.72 (s, 3H).

$^{13}\text{C NMR}$  (75 MHz,  $\text{CDCl}_3$ )  $\delta$  172.5, 154.6, 153.7, 137.4, 133.3, 133.2, 128.6, 128.5, 128.4, 127.8, 127.7, 127.6, 127.5, 127.0, 126.7, 125.2, 124.7, 123.0, 122.0, 113.0, 111.3, 52.5, 48.0.

**Mp:** 128-131 °C

**HRMS** (ESI) calcd. For  $\text{C}_{27}\text{H}_{21}\text{O}_3^+$   $[\text{M}+\text{H}]^+$   $m/z$  393.1484, found: 393.1484.

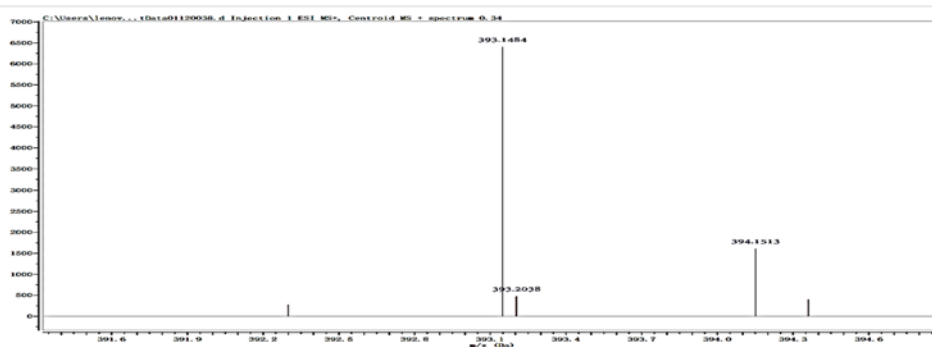

**methyl 2-(2-phenylbenzofuran-3-yl)-2-(4-(trifluoromethyl)phenyl)acetate (5e)**

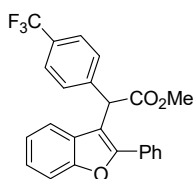

Prepared according to general procedure from 2-(phenylethynyl)phenol (38.8 mg, 0.2 mmol, 1.0 equiv.), methyl 2-diazo-2-(4-(trifluoromethyl)phenyl)acetate (58.6 mg, 0.24 mmol, 1.2 equiv.), (2,4-<sup>t</sup>Bu<sub>2</sub>C<sub>6</sub>H<sub>3</sub>O)<sub>3</sub>PAuOTf (19.9 mg, 0.02 mmol, 10 mol%) in 4 mL DCM at 40 °C for 3 h. The residue was purified by silica gel column chromatography (petroleum ether/ethyl acetate = 20:1) to give product as a colorless oil (36.9 mg, 45%).

**R<sub>f</sub>** = 0.4 (petroleum ether/ethyl acetate = 20:1)

**<sup>1</sup>H NMR** (400 MHz, CDCl<sub>3</sub>) δ 7.71-7.65 (m, 2H), 7.54 (t, *J* = 8.2 Hz, 3H), 7.50-7.36 (m, 6H), 7.33-7.25 (m, 1H), 7.21-7.15 (m, 1H), 5.55 (s, 1H), 3.70 (s, 3H).

**<sup>13</sup>C NMR** (100 MHz, CDCl<sub>3</sub>) δ 171.9, 154.5, 154.0, 141.3, 130.0, 129.7 (q, <sup>2</sup>*J*<sub>C-F</sub> = 32.3 Hz), 129.4, 129.0, 128.9, 128.3, 128.0, 125.6 (q, <sup>3</sup>*J*<sub>C-F</sub> = 3.8 Hz), 124.9, 124.2 (q, <sup>1</sup>*J*<sub>C-F</sub> = 270.4), 123.2, 121.6, 111.6, 111.5, 52.7, 47.6.

**<sup>19</sup>F NMR** (471 MHz, CDCl<sub>3</sub>) δ -62.4.

**HRMS** (ESI) calcd. For C<sub>24</sub>H<sub>18</sub>F<sub>3</sub>O<sub>3</sub><sup>+</sup> [M+H]<sup>+</sup> *m/z* 411.1203, found: 411.1201.

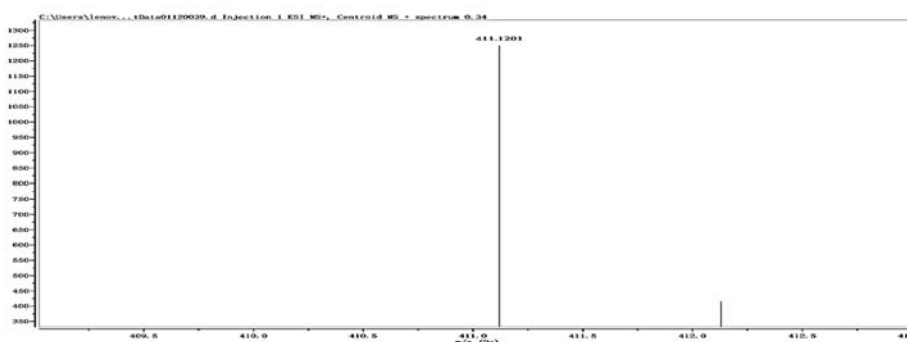

## Further exploration and control experiments for Scheme 4

### Scheme 4a

#### Gram-scale reaction of 3a

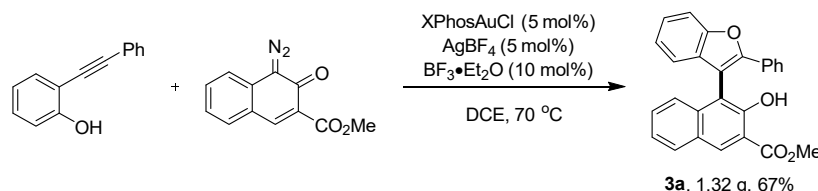

To a dry three-neck flask (250 mL) was added XPhosAuCl (177.5 mg, 0.25 mmol, 5 mol%), AgBF<sub>4</sub> (47.5 mg, 0.25 mmol, 5 mol%) and BF<sub>3</sub>·Et<sub>2</sub>O (71.1 mg, 0.5 mmol, 10 mol%) in DCE (50 mL). The resulting mixture was stirred at rt for 10 min. Then a solution of **1a** (1.94 g, 10 mmol, 2.0 equiv.) and **2a** (1.14 g, 5 mmol, 1.0 equiv.) in DCE (50 mL) was added in one portion to the reaction mixture under argon atmosphere. The resulting mixture was stirred at 70 °C in an oil bath for 1.5 h until the substrate **2a** disappeared (monitored by TLC). At this time, the reaction mixture was concentrated.

The residue was purified by silica gel column chromatography (Petroleum ether/EtOAc = 100:1-30:1) to give desired product **3a** (1.32 g, 67%).

#### Scheme 4b

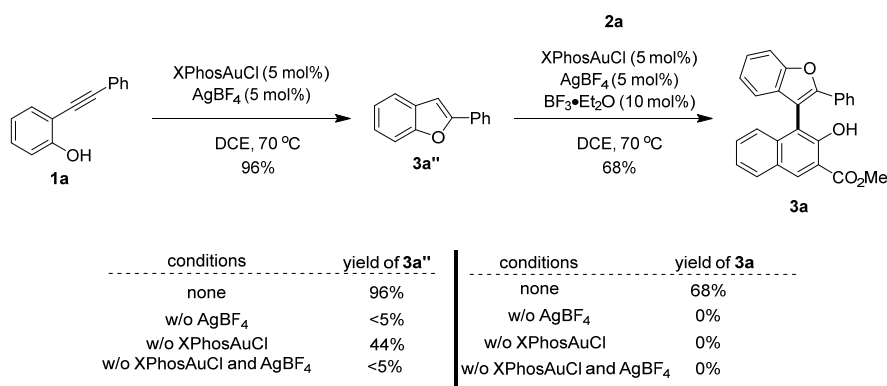

To a 10 mL flame-dried tube equipped with a stirrer was added XPhosAuCl (28.4 mg, 0.04 mmol, 5 mol%) and AgBF<sub>4</sub> (7.8 mg, 0.04 mmol, 5 mol%) in DCE (4 mL). The resulting mixture was stirred at rt for 10 min. Then a solution of **1a** (155.2 mg, 0.8 mmol, 1.0 equiv.) in DCE (4 mL) was added in one portion to the reaction mixture under argon atmosphere. The resulting mixture was stirred at 70 °C in an oil bath for 0.5 h until the substrate **1a** disappeared (monitored by TLC). At this time, the reaction mixture was concentrated. The residue was purified by silica gel column chromatography (petroleum ether) to give desired product **3a''** (149.0 mg, 96%). In the absence of silver salt, very low yield of **3a''** (<5%) was observed. Without the addition of XPhosAuCl, 44% yield of **3a''** was isolated. In the absence of neither silver nor gold salt, very low yield of **3a''** (<5%) was observed.

To a 10 mL flame-dried tube equipped with a stirrer was added XPhosAuCl (7.1 mg, 0.01 mmol, 5 mol%), AgBF<sub>4</sub> (1.9 mg, 0.01 mmol, 5 mol%) and BF<sub>3</sub>·Et<sub>2</sub>O (2.8 mg, 0.02 mmol, 10 mol%) in DCE (2 mL). The resulting mixture was stirred at rt for 10 min. Then a solution of **3a''** (77.6 mg, 0.4 mmol, 2.0 equiv.) and **2a** (45.6 mg, 0.2 mmol, 1.0 equiv.) in DCE (2 mL) was added in one portion to the reaction mixture under argon atmosphere. The resulting mixture was stirred at 70 °C in an oil bath for 1.5 h until the substrate **2a** disappeared (monitored by TLC). At this time, the reaction mixture was concentrated. The residue was purified by silica gel column chromatography (Petroleum ether: ethyl acetate = 100:1-50:1) to give desired product **3a** (53.6 mg, 68%). However, no **3a** was observed in the absence of either silver or gold salt.

#### Scheme 4c

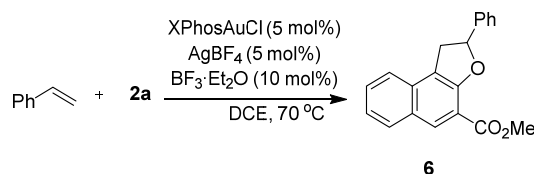

To a 10 mL flame-dried tube equipped with a stirrer was added XPhosAuCl (7.1 mg, 0.01 mmol, 5 mol%), AgBF<sub>4</sub> (1.9 mg, 0.01 mmol, 5 mol%) and BF<sub>3</sub>·Et<sub>2</sub>O (2.8 mg, 0.02 mmol, 10 mol%) in DCE (2 mL). The resulting mixture was stirred at rt for 10 min. Then a solution of styrene (20.8 mg, 0.2 mmol, 1.0 equiv.) and **2a** (45.6 mg, 0.2 mmol, equiv.) in DCE (2 mL) was added in one portion to the reaction mixture under argon atmosphere. The resulting mixture was stirred at 70 °C in an oil

bath for 4 h until the substrate **2a** disappeared (monitored by TLC). At this time, the reaction mixture was concentrated. The residue was purified by silica gel column chromatography (Petroleum ether: ethyl acetate) to give desired product **6** (colorless oil, 31.0 mg, 51%).

**methyl 2-phenyl-1,2-dihydronaphtho[2,1-b]furan-4-carboxylate (6)**

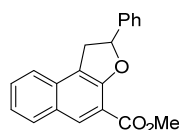

$R_f = 0.4$  (petroleum ether/ethyl acetate = 10:1)

$^1\text{H NMR}$  (400 MHz,  $\text{CDCl}_3$ )  $\delta$  8.44 (s, 1H), 7.88 (d,  $J = 8.4$  Hz, 1H), 7.56-7.49 (m, 2H), 7.48-7.41 (m, 2H), 7.40-7.27 (m, 4H), 6.10 (dd,  $J = 10.0, 7.2$  Hz, 1H), 3.99-3.91 (m, 4H), 3.46 (ddd,  $J = 15.6, 7.2, 0.8$  Hz, 1H).

$^{13}\text{C NMR}$  (100 MHz,  $\text{CDCl}_3$ )  $\delta$  165.9, 155.8, 142.2, 132.8, 132.7, 130.0, 129.0, 128.7, 128.5, 128.1, 125.7, 123.8, 122.8, 120.4, 115.1, 85.1, 52.3, 37.0.

**HRMS** (ESI) calcd. For  $\text{C}_{20}\text{H}_{17}\text{O}_3^+$   $[\text{M}+\text{H}]^+$   $m/z$  305.1172, found: 443.1644.

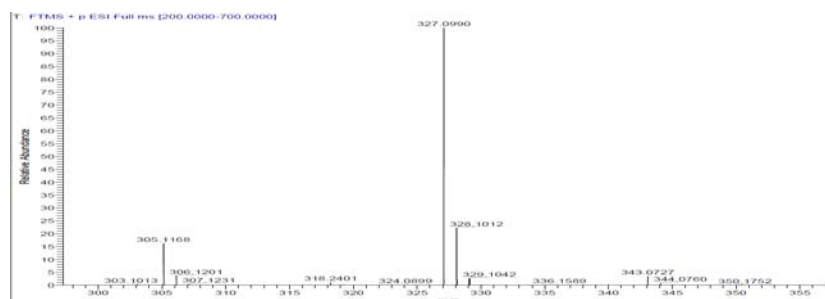

**Scheme 4d**

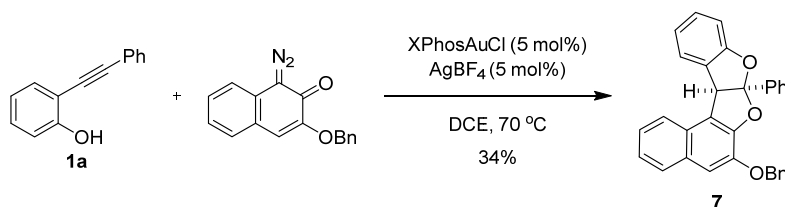

To a 10 mL flame-dried tube equipped with a stirrer was added XPhosAuCl (7.1 mg, 0.01 mmol, 5 mol%) and  $\text{AgBF}_4$  (1.9 mg, 0.01 mmol, 5 mol%) in DCE (2 mL). The resulting mixture was stirred at rt for 10 min. Then a solution of **1a** (77.6 mg, 0.4 mmol, 2.0 equiv.) and 3-(benzyloxy)-1-diazonaphthalen-2(1H)-one (45.6 mg, 0.2 mmol, 1.0 equiv.) in DCE (2 mL) was added in one portion to the reaction mixture under argon atmosphere. The resulting mixture was stirred at 70 °C in an oil bath for 10 h until the substrate 3-(benzyloxy)-1-diazonaphthalen-2(1H)-one disappeared (monitored by TLC). At this time, the reaction mixture was concentrated. The residue was purified by silica gel column chromatography (petroleum ether/ethyl acetate = 20:1) to give desired product **7** (white solid, 30.1 mg, 34%).

**6-(benzyloxy)-7a-phenyl-7a,12b-dihydronaphtho[1',2':4,5]furo[2,3-b]benzofuran (7)**

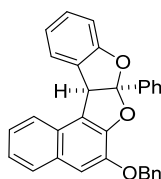

$R_f = 0.4$  (petroleum ether/ethyl acetate = 20:1)

$^1\text{H NMR}$  (400 MHz,  $\text{CDCl}_3$ )  $\delta$  7.93 (d,  $J = 8.0$  Hz, 1H), 7.69 (d,  $J = 8.0$  Hz, 1H), 7.63-7.59 (m, 2H), 7.56 (d,  $J = 7.6$  Hz, 1H), 7.51-7.47 (m, 2H), 7.44 (ddd,  $J = 8.0, 6.8, 1.2$  Hz, 1H), 7.41-7.26 (m, 7H), 7.23-7.18 (m, 1H), 7.15 (s, 1H), 7.06 (d,  $J = 8.4$  Hz, 1H), 6.91 (td,  $J = 7.6, 1.2$  Hz, 1H), 5.43 (s, 1H), 5.28 (s, 2H).

$^{13}\text{C NMR}$  (100 MHz,  $\text{CDCl}_3$ )  $\delta$  158.3, 147.8, 144.5, 139.5, 136.6, 131.1, 129.3, 129.1, 128.63, 128.62, 128.03, 127.96, 127.5, 127.3, 125.4, 125.2, 125.1, 125.0, 124.1, 122.9, 122.6, 122.1, 120.9, 110.6, 109.9, 70.9, 57.7.

**Mp:** 167-169 °C.

**HRMS** (ESI) calcd. For  $\text{C}_{31}\text{H}_{23}\text{O}_3^+$   $[\text{M}+\text{H}]^+$   $m/z$  443.1642, found: 443.1644.

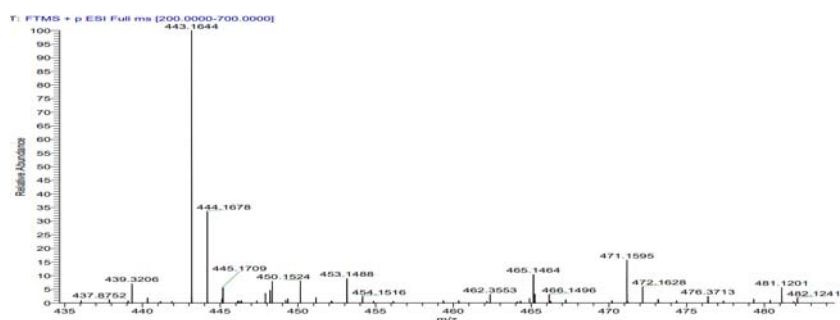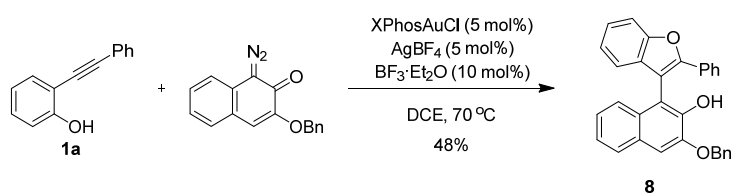

To a 10 mL flame-dried tube equipped with a stirrer was added XPhosAuCl (7.1 mg, 0.01 mmol, 5 mol%), AgBF<sub>4</sub> (1.9 mg, 0.01 mmol, 5 mol%) and BF<sub>3</sub>·Et<sub>2</sub>O (2.8 mg, 0.02 mmol, 10 mol%) in DCE (2 mL). The resulting mixture was stirred at rt for 10 min. Then a solution of **1a** (77.6 mg, 0.4 mmol, 2.0 equiv.) and 3-(benzyloxy)-1-diazonaphthalen-2(1H)-one (55.2 mg, 0.2 mmol, 1.0 equiv.) in DCE (2 mL) was added in one portion to the reaction mixture under argon atmosphere. The resulting mixture was stirred at 70 °C in an oil bath for 1.5 h until the substrate **2a** disappeared (monitored by TLC). At this time, the reaction mixture was concentrated. The residue was purified by silica gel column chromatography (Petroleum ether: ethyl acetate = 10:1) to give desired product **8** (white solid, 42.4 mg, 48%).

### 3-(benzyloxy)-1-(2-phenylbenzofuran-3-yl)naphthalen-2-ol (**8**)

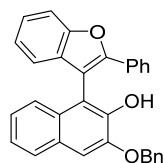

$R_f = 0.3$  (petroleum ether/ethyl acetate = 20:1)

$^1\text{H NMR}$  (400 MHz,  $\text{CDCl}_3$ )  $\delta$  7.76 (d,  $J = 8.0$  Hz, 1H), 7.64-7.58 (m, 3H), 7.51-7.44 (m, 3H), 7.44-7.35 (m, 4H), 7.35-7.29 (m, 2H), 7.22-7.15 (m, 4H), 7.15-7.07 (m, 2H), 6.07 (s, 1H), 5.30 (dd,  $J = 13.2, 11.6$  Hz, 2H).

$^{13}\text{C NMR}$  (100 MHz,  $\text{CDCl}_3$ )  $\delta$  154.2, 152.1, 146.5, 144.1, 135.9, 130.9, 130.8, 129.1, 128.9, 128.8,

128.6, 128.5, 128.3, 128.0, 127.1, 126.0, 125.0, 124.9, 124.7, 124.3, 122.9, 120.6, 112.2, 111.3, 110.1, 107.9, 71.2.

**Mp:** 187-189 °C.

**HRMS (ESI) calcd.** For C<sub>31</sub>H<sub>23</sub>O<sub>3</sub><sup>+</sup> [M+H]<sup>+</sup> m/z 443.1642, found: 443.1640.

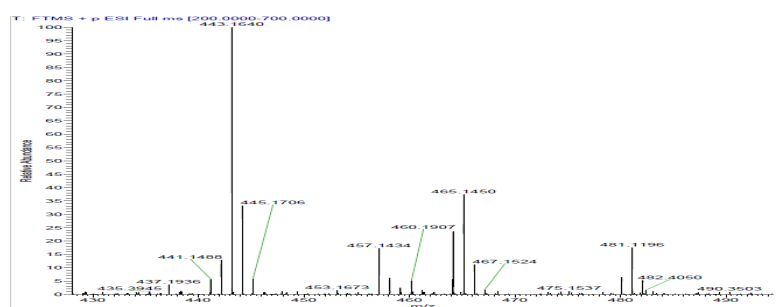

#### Scheme 4e

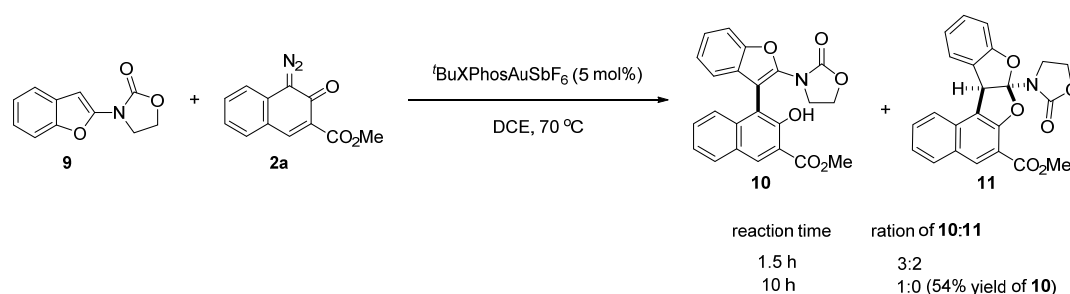

To a flame-dried tube equipped with a stirrer was added *t*BuPhosAuCl (6.6 mg, 0.01 mmol, 5 mol%), AgSbF<sub>6</sub> (3.4 mg, 0.01 mmol, 5 mol%) and DCE (2 mL). The mixture was stirred at rt for 10 min under argon atmosphere, then a solution of **9** (44.9 mg, 0.22 mmol, 1.1 equiv.) and **2a** (45.8 mg, 0.2 mmol, 1.0 equiv.) in 2 mL DCE was added into the reaction mixture in one portion. The reaction was stirred at 70 °C in a heating block for 1.5 h. The reaction mixture was concentrated under vacuum, the residue was purified by silica gel column chromatography (petroleum ether/ethyl acetate = 5:1-2:1) to give **10** and **11** (ration of 3:2). When the reaction was performed for 10 h, we could only get **10**.

#### *methyl 3-hydroxy-4-(2-(2-oxooxazolidin-3-yl)benzofuran-3-yl)-2-naphthoate (10)*

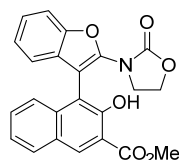

To a 10 mL flame-dried tube equipped with a stirrer was added **7** (44.7 mg, 0.22 mmol, 1.1 equiv.) **2a** (45.6 mg, 0.2 mmol, 1.0 equiv.) and *t*BuXPhosAuSbF<sub>6</sub> (8.6 mg, 0.01 mmol, 5 mol%) in 4 mL DCE at 70 °C for 10 h. The residue was purified by silica gel column chromatography (petroleum ether/ethyl acetate = 2:1) to give product as a yellow solid (43.5 mg, 54%).

**R<sub>f</sub>** = 0.4 (petroleum ether/ethyl acetate = 2:1)

**<sup>1</sup>H NMR** (400 MHz, CDCl<sub>3</sub>) δ 10.92 (s, 1H), 8.62 (s, 1H), 7.87 (d, *J* = 8.4 Hz, 1H), 7.67 (d, *J* = 8.4 Hz, 1H), 7.54 (d, *J* = 8.0 Hz, 1H), 7.48-7.44 (m, 1H), 7.38-7.30 (m, 2H), 7.18-7.14 (m, 1H), 7.10 (d, *J* = 7.6 Hz, 1H), 4.01-4.28 (m, 2H), 4.09-4.04 (m, 1H), 4.04 (s, 3H), 3.98-3.91 (m, 1H).



$^{13}\text{C}$  NMR (100 MHz,  $\text{CDCl}_3$ )  $\delta$  170.7, 154.8, 154.1, 152.0, 144.5, 136.8, 133.4, 129.9, 129.3, 127.1, 125.3, 124.7, 124.4, 123.2, 120.8, 113.8, 112.0, 111.4, 105.4, 63.0, 52.9, 45.4.

**Mp:** 196-198 °C.

**HRMS (ESI)** calcd. For  $\text{C}_{23}\text{H}_{18}\text{NO}_6^+$   $[\text{M}+\text{H}]^+$   $m/z$  404.1129, found: 404.1135.

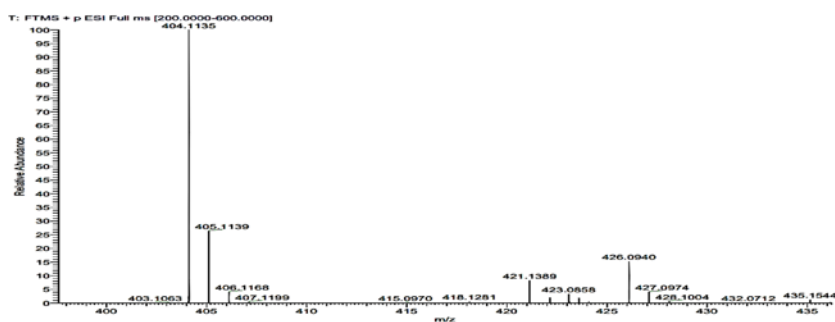

***methyl-7a-(2-oxooxazolidin-3-yl)-7a,12b-dihydronaphtho[1',2':4,5]furo[2,3-b]benzofuran-6-carboxylate (11)***

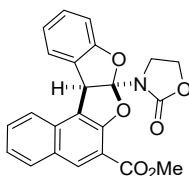

To a 10 mL flame-dried tube equipped with a stirrer was added **7** (44.7 mg, 0.22 mmol, 1.1 equiv.) **2a** (45.6 mg, 0.2 mmol, 1.0 equiv.) and  $t\text{BuXPhosAuSbF}_6$  (8.6 mg, 0.01 mmol, 5 mol%) in 4 mL DCE at 70 °C for 1.5 h. The residue was purified by silica gel column chromatography (petroleum ether/ethyl acetate = 2:1) to give product as a yellow solid (14.0 mg, 17.4%).

$R_f$  = 0.3 (petroleum ether/ethyl acetate = 2:1)

$^1\text{H}$  NMR (400 MHz,  $\text{CDCl}_3$ )  $\delta$  8.37 (s, 1H), 8.03 (dd,  $J$  = 8.4, 0.8 Hz, 2H), 7.84 (d,  $J$  = 8.4 Hz, 1H), 7.63 (ddd,  $J$  = 8.4, 6.8, 1.2 Hz, 1H), 7.50-7.48 (m, 1H), 7.37 (ddd,  $J$  = 8.0, 6.8, 1.2 Hz, 1H), 7.13-7.08 (m, 1H), 6.88-6.84 (m, 2H), 6.23 (s, 1H), 4.43-4.31 (m, 2H), 4.17-4.09 (m, 2H), 3.89 (s, 2H).

$^{13}\text{C}$  NMR (100 MHz,  $\text{CDCl}_3$ )  $\delta$  164.9, 156.7, 155.7, 152.6, 133.5, 132.0, 130.4, 129.8, 129.4, 129.1, 126.6, 125.2, 125.0, 124.8, 123.1, 122.5, 121.8, 114.8, 110.4, 62.8, 52.3, 51.0, 43.3.

**Mp:** 212-214 °C.

**HRMS (ESI)** calcd. For  $\text{C}_{23}\text{H}_{18}\text{NO}_6^+$   $[\text{M}+\text{H}]^+$   $m/z$  404.1129, found: 404.1128.

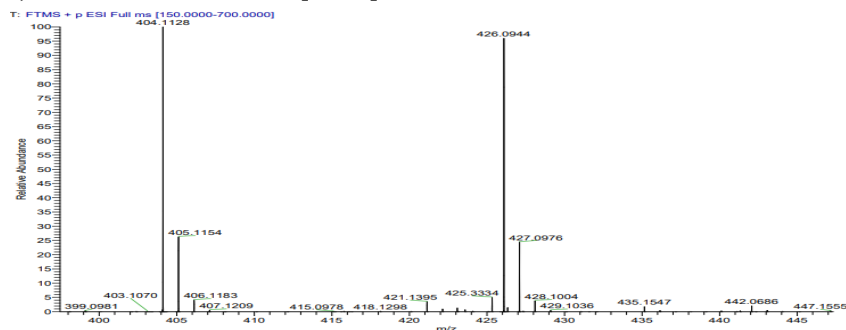

## X-ray crystallographic data

The crystal structures have been deposited at the Cambridge Crystallographic Data Centre. CCDC 2257602 (**10**) and CCDC 2257604 (**11**) contains the supplementary crystallographic data for this paper. These data can be obtained free of charge via the internet at <https://www.ccdc.cam.ac.uk/structures/>. The measurements were taken in a Bruker D8 Venture diffractometer. The data were integrated by Bruker D8 with multi-scan absorption corrections. The structure solution and refinement were processed by SHELXL (2018/3).

### X-ray crystallographic data for **10** and **11**

**Method of crystallization:** A solution of **10** in ethyl acetate and petroleum ether was evaporated the solvent slowly at room temperature.

**Crystal data and structure for **10**** (thermal ellipsoids are shown at the 50% level)

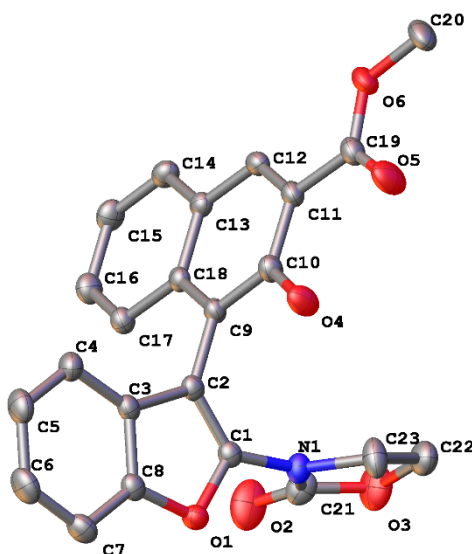

X-ray structure of **10**.

|                        |                                                 |          |
|------------------------|-------------------------------------------------|----------|
| Empirical formula      | C <sub>23</sub> H <sub>17</sub> NO <sub>6</sub> |          |
| Formula weight         | 403.38                                          |          |
| Temperature            | 213.00 K                                        |          |
| Wavelength             | 1.34139 Å                                       |          |
| Crystal system         | Orthorhombic                                    |          |
| Space group            | Pbca                                            |          |
| Unit cell dimensions   | a = 11.6847(3) Å                                | α = 90 ° |
|                        | b = 13.9633(3) Å                                | β = 90 ° |
|                        | c = 23.2986(6) Å                                | γ = 90 ° |
| Volume                 | 3801.33(16) Å <sup>3</sup>                      |          |
| Z                      | 8                                               |          |
| Density (calculated)   | 1.410 Mg/m <sup>3</sup>                         |          |
| Absorption coefficient | 0.546 mm <sup>-1</sup>                          |          |
| F(000)                 | 1680                                            |          |
| Crystal size           | 0.07 x 0.07 x 0.05 mm <sup>3</sup>              |          |

|                                         |                                                                        |
|-----------------------------------------|------------------------------------------------------------------------|
| $\theta$ range for data collection      | 3.301 to 54.980°                                                       |
| Index ranges                            | -14 $\leq$ h $\leq$ 14, -12 $\leq$ k $\leq$ 17, -28 $\leq$ l $\leq$ 28 |
| Reflections collected                   | 41038                                                                  |
| Independent reflections                 | 3619 [R(int) = 0.0505]                                                 |
| Completeness to $\theta = 53.594^\circ$ | 99.8 %                                                                 |
| Max. and min. transmission              | 0.7508 and 0.6058                                                      |
| Data / restraints / parameters          | 3619 / 0 / 273                                                         |
| Goodness-of-fit on $F^2$                | 1.192                                                                  |
| Final R indices [ $I > 2\sigma(I)$ ]    | $R_1 = 0.0433$ , $wR_2 = 0.1405$                                       |
| R indices (all data)                    | $R_1 = 0.0525$ , $wR_2 = 0.1499$                                       |
| Largest diff. peak and hole             | 0.256 and -0.294 e. $\text{\AA}^{-3}$                                  |

### X-ray crystallographic data for **11**

**Method of crystallization:** A solution of **11** in ethyl acetate and dichloromethane was evaporated the solvent slowly at room temperature.

**Crystal data and structure for **11**** (thermal ellipsoids are shown at the 50% level)

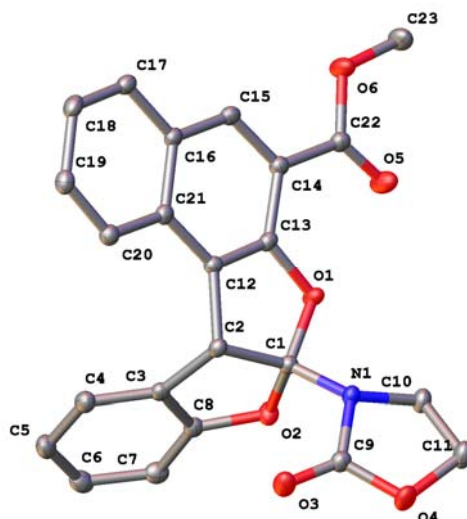

X-ray structure of **11**.

|                      |                             |                             |
|----------------------|-----------------------------|-----------------------------|
| Empirical formula    | $C_{23}H_{17}NO_6$          |                             |
| Formula weight       | 403.38                      |                             |
| Temperature          | 214.00 K                    |                             |
| Wavelength           | 1.34139 $\text{\AA}$        |                             |
| Crystal system       | Monoclinic                  |                             |
| Space group          | P 1 21/n 1                  |                             |
| Unit cell dimensions | $a = 9.4331(2) \text{\AA}$  | $\alpha = 90^\circ$         |
|                      | $b = 11.3391(2) \text{\AA}$ | $\beta = 96.5160(10)^\circ$ |
|                      | $c = 17.0360(3) \text{\AA}$ | $\gamma = 90^\circ$         |
| Volume               | $1810.45(6) \text{\AA}^3$   |                             |
| Z                    | 4                           |                             |
| Density (calculated) | $1.480 \text{ Mg/m}^3$      |                             |

|                                   |                                                   |
|-----------------------------------|---------------------------------------------------|
| Absorption coefficient            | 0.573 mm <sup>-1</sup>                            |
| F(000)                            | 840                                               |
| Crystal size                      | 0.08 x 0.07 x 0.07 mm <sup>3</sup>                |
| θ range for data collection       | 4.460 to 54.936°.                                 |
| Index ranges                      | -11<=h<=11, -12<=k<=13, -20<=l<=18                |
| Reflections collected             | 13399                                             |
| Independent reflections           | 3429 [R(int) = 0.0399]                            |
| Completeness to θ = 53.594°       | 99.5 %                                            |
| Max. and min. transmission        | 0.7508 and 0.6293                                 |
| Data / restraints / parameters    | 3425 / 0 / 272                                    |
| Goodness-of-fit on F <sup>2</sup> | 1.062                                             |
| Final R indices [I > 2σ(I)]       | R <sub>1</sub> = 0.0401, wR <sub>2</sub> = 0.0988 |
| R indices (all data)              | R <sub>1</sub> = 0.0543, wR <sub>2</sub> = 0.1064 |
| Largest diff. peak and hole       | 0.212 and -0.305 e.Å <sup>-3</sup>                |

## References

- (a) Wang, Z.; Cao, T.; Zhu, S. Gold-Catalyzed Enynal and Enynol Coupling by Selectively Steering Two Transient Vinyl-Gold Intermediates. *Org. Lett.* **2022**, *24*, 9296-9300. (b) Zhang, Y.; Xin, Z.; Xue, J.; Li, Y. Gold-catalyzed Alkyne Hydroxylation: Synthesis of 2-Substituted Benzo[b]furan Compounds. *Chinese J. Chem.* **2008**, *26*, 1461-1464. (c) Xia, Z.; Corcé, V.; Zhao, F.; Przybylski, C.; Espagne, A.; Jullien, L.; Saux, T.; Gimbert, Y.; Dossmann, H.; Ollivier, C.; Fensterbank, L. Photosensitized Oxidative Addition to Gold(I) Enables Alkynylative Cyclization of *o*-Alkynylphenols with Iodoalkynes. *Nat. Chem.* **2019**, *11*, 797-805.
- (a) Niu, C.; Zhou, Y.; Chen, Q.; Zhu, Y.; Tang, S.; Yu, Z.; Sun, J. Atroposelective Synthesis of N-Arylindoles via Enantioselective N-H Bond Insertion. *Org. Lett.* **2022**, *24*, 7428-7433. (b) Li, Z.; Chen, Y.; Wang, C.; Xu, G.; Shao, Y.; Zhang, X.; Tang, S.; Sun, J. Construction of C-C Axial Chirality via Asymmetric Carbene Insertion into Arene C-H Bonds. *Angew. Chem. Int. Ed.* **2021**, *60*, 25714-25718. (c) Zhang, J.; Jiang, F.; Chen, Y.; Xiang, S.; Tan, B. Synthesis of Structurally Diversified BINOLs and NOBINs via Palladium-Catalyzed C-H Arylation with Diazoquinones. *Sci. China Chem.* **2021**, *64*, 1515-1521.
- Su, J.; Li, Q.; Shao, Y.; Sun, J. Catalytic Transformations of 2-Pyridones by Rhodium-Mediated Carbene Transfer. *Org. Lett.* **2022**, *21*, 1637-1641.

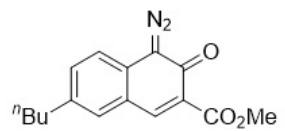

8.377

7.499  
7.455  
7.451  
7.438  
7.435  
7.220  
7.204

3.944  
2.707  
2.691  
2.676  
1.662  
1.650  
1.647  
1.644  
1.636  
1.632  
1.627  
1.620  
1.617  
1.613  
1.601  
1.407  
1.392  
1.377  
1.362  
1.347  
1.334  
1.332  
0.959  
0.944  
0.930  
-0.000

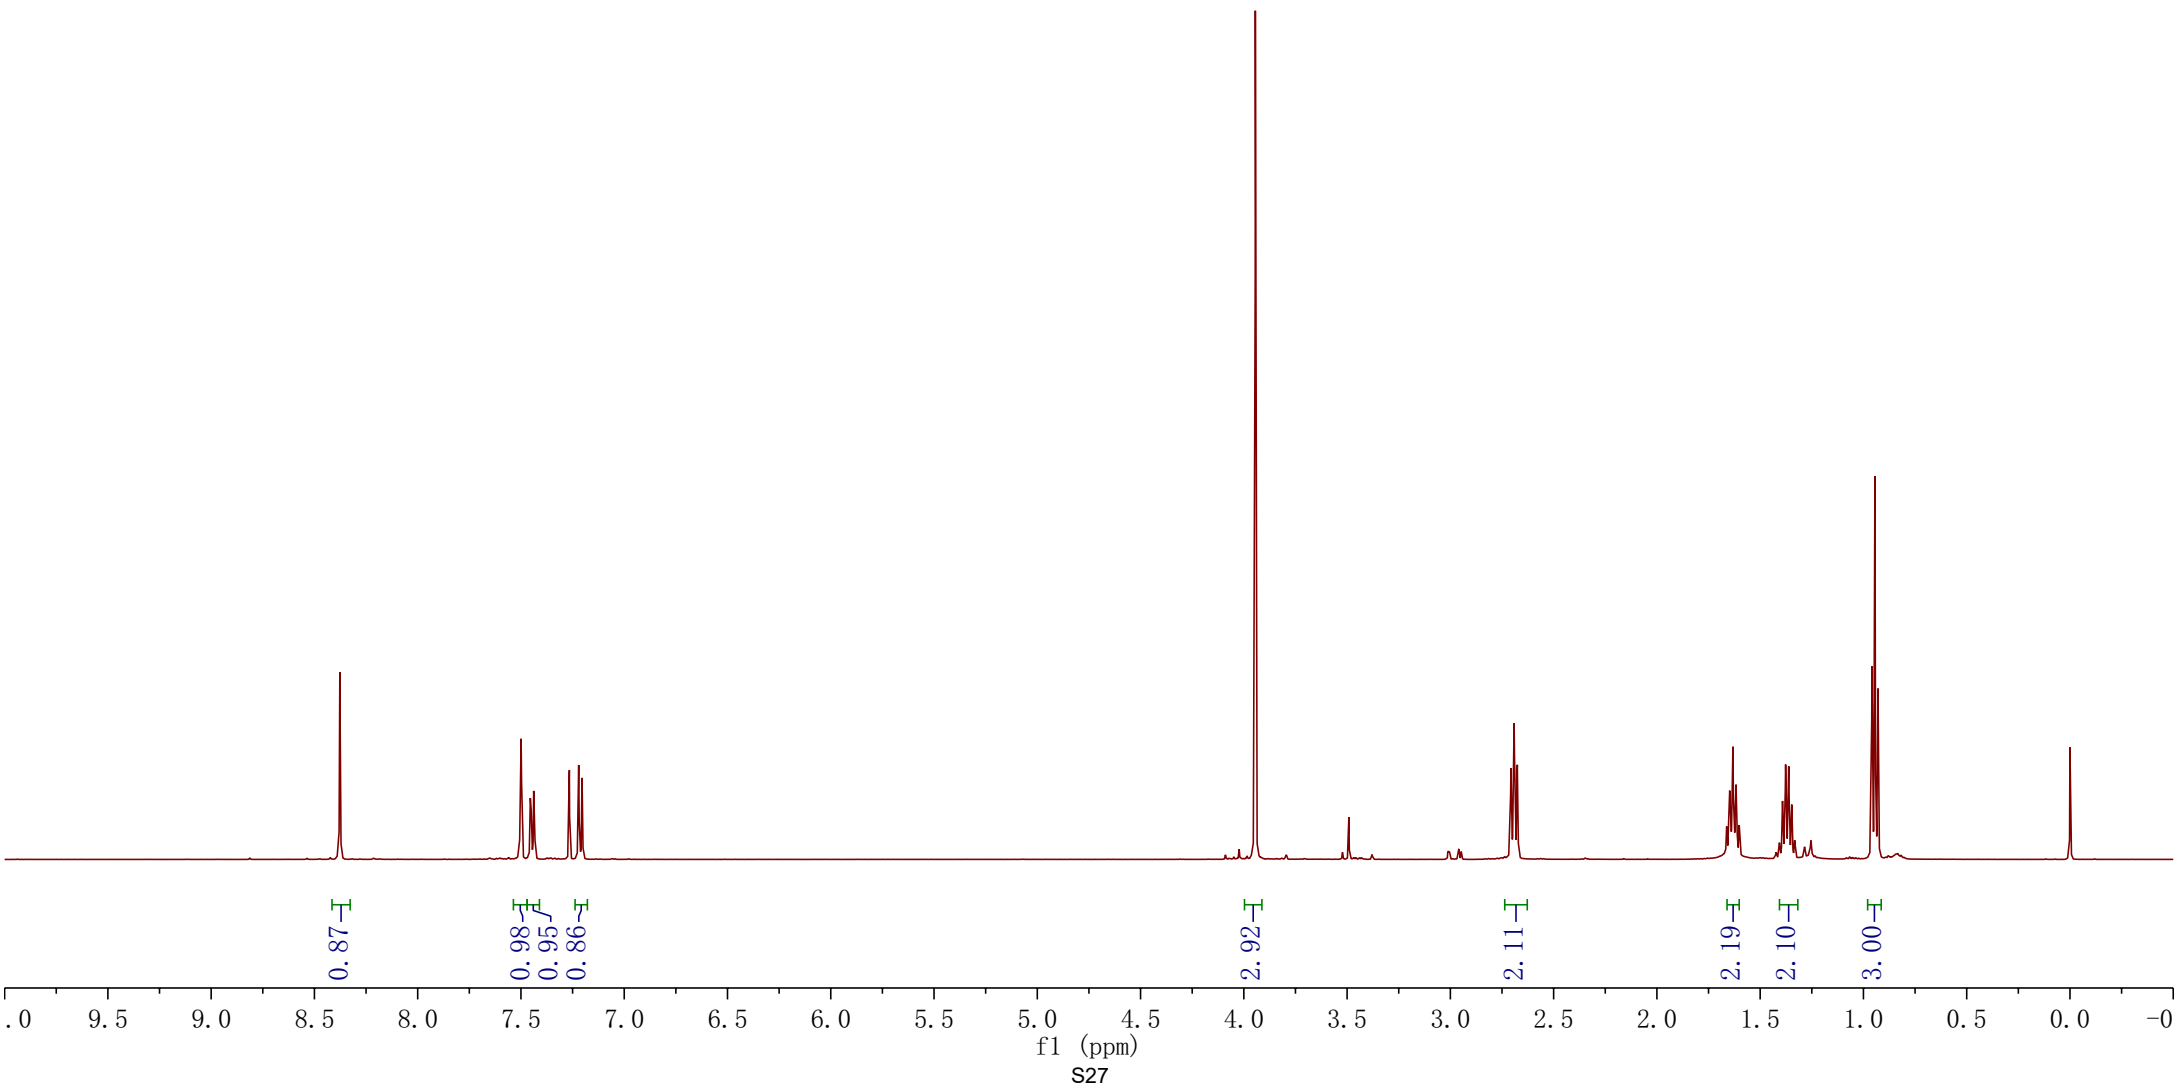

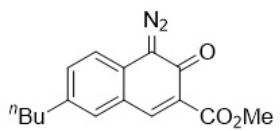

**2g**  
125 MHz, CDCl<sub>3</sub>

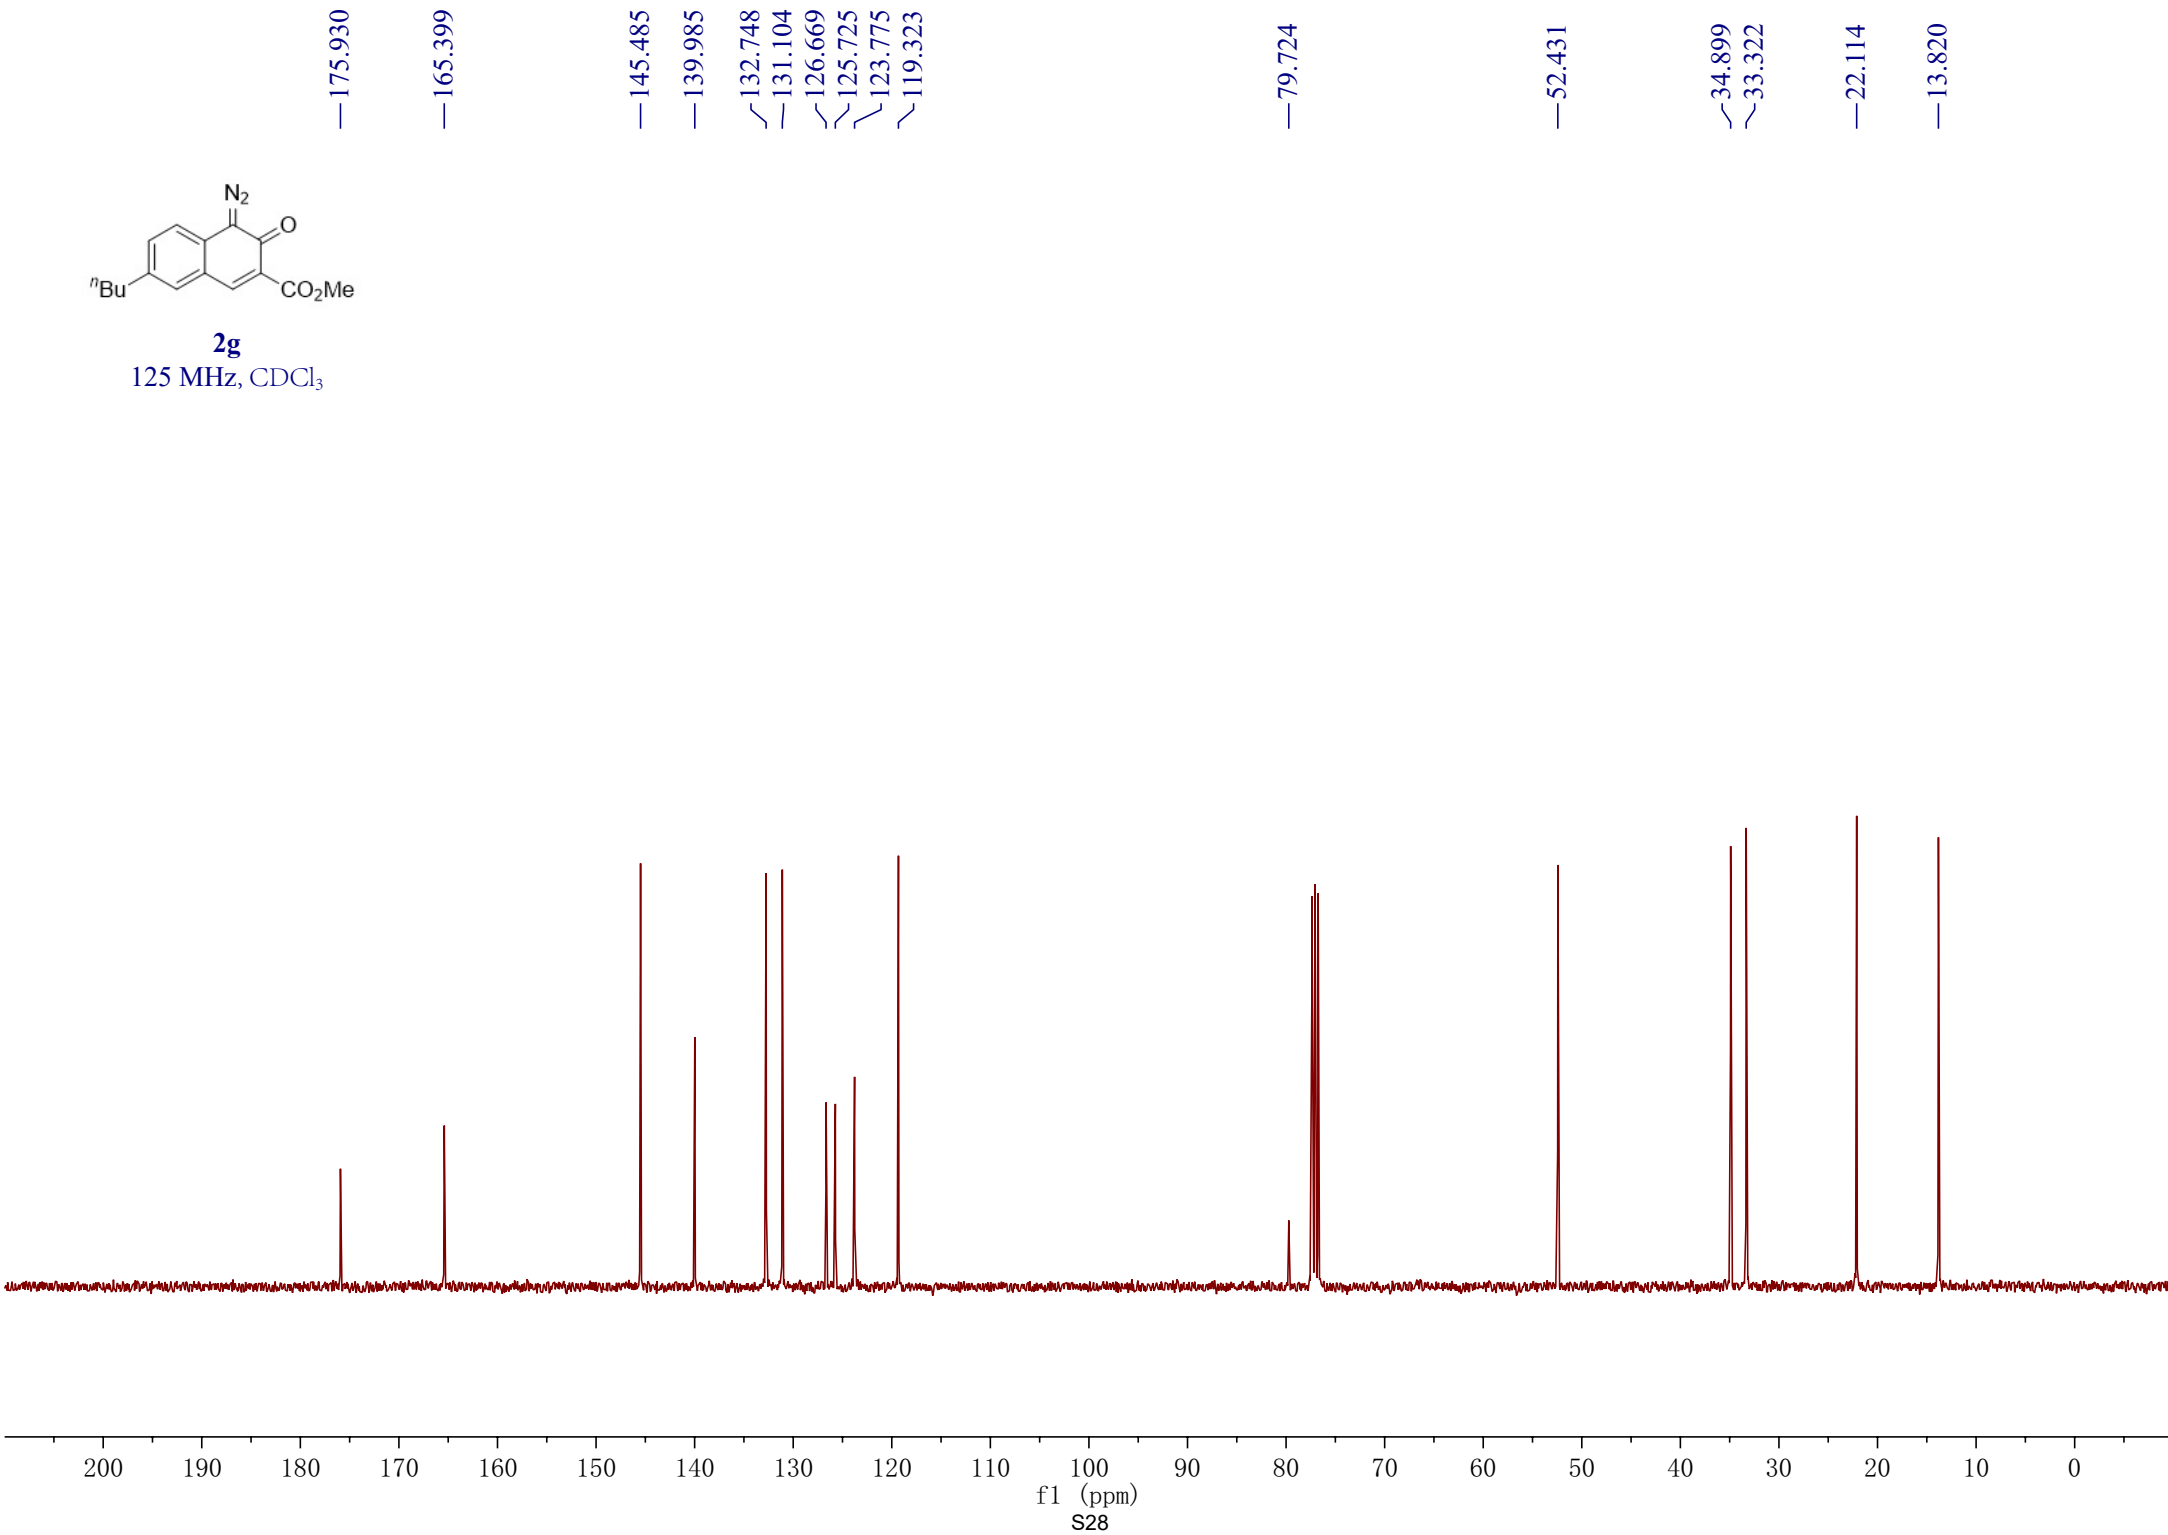

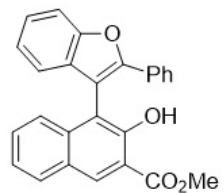

400 MHz, CDCl<sub>3</sub>

**3a**

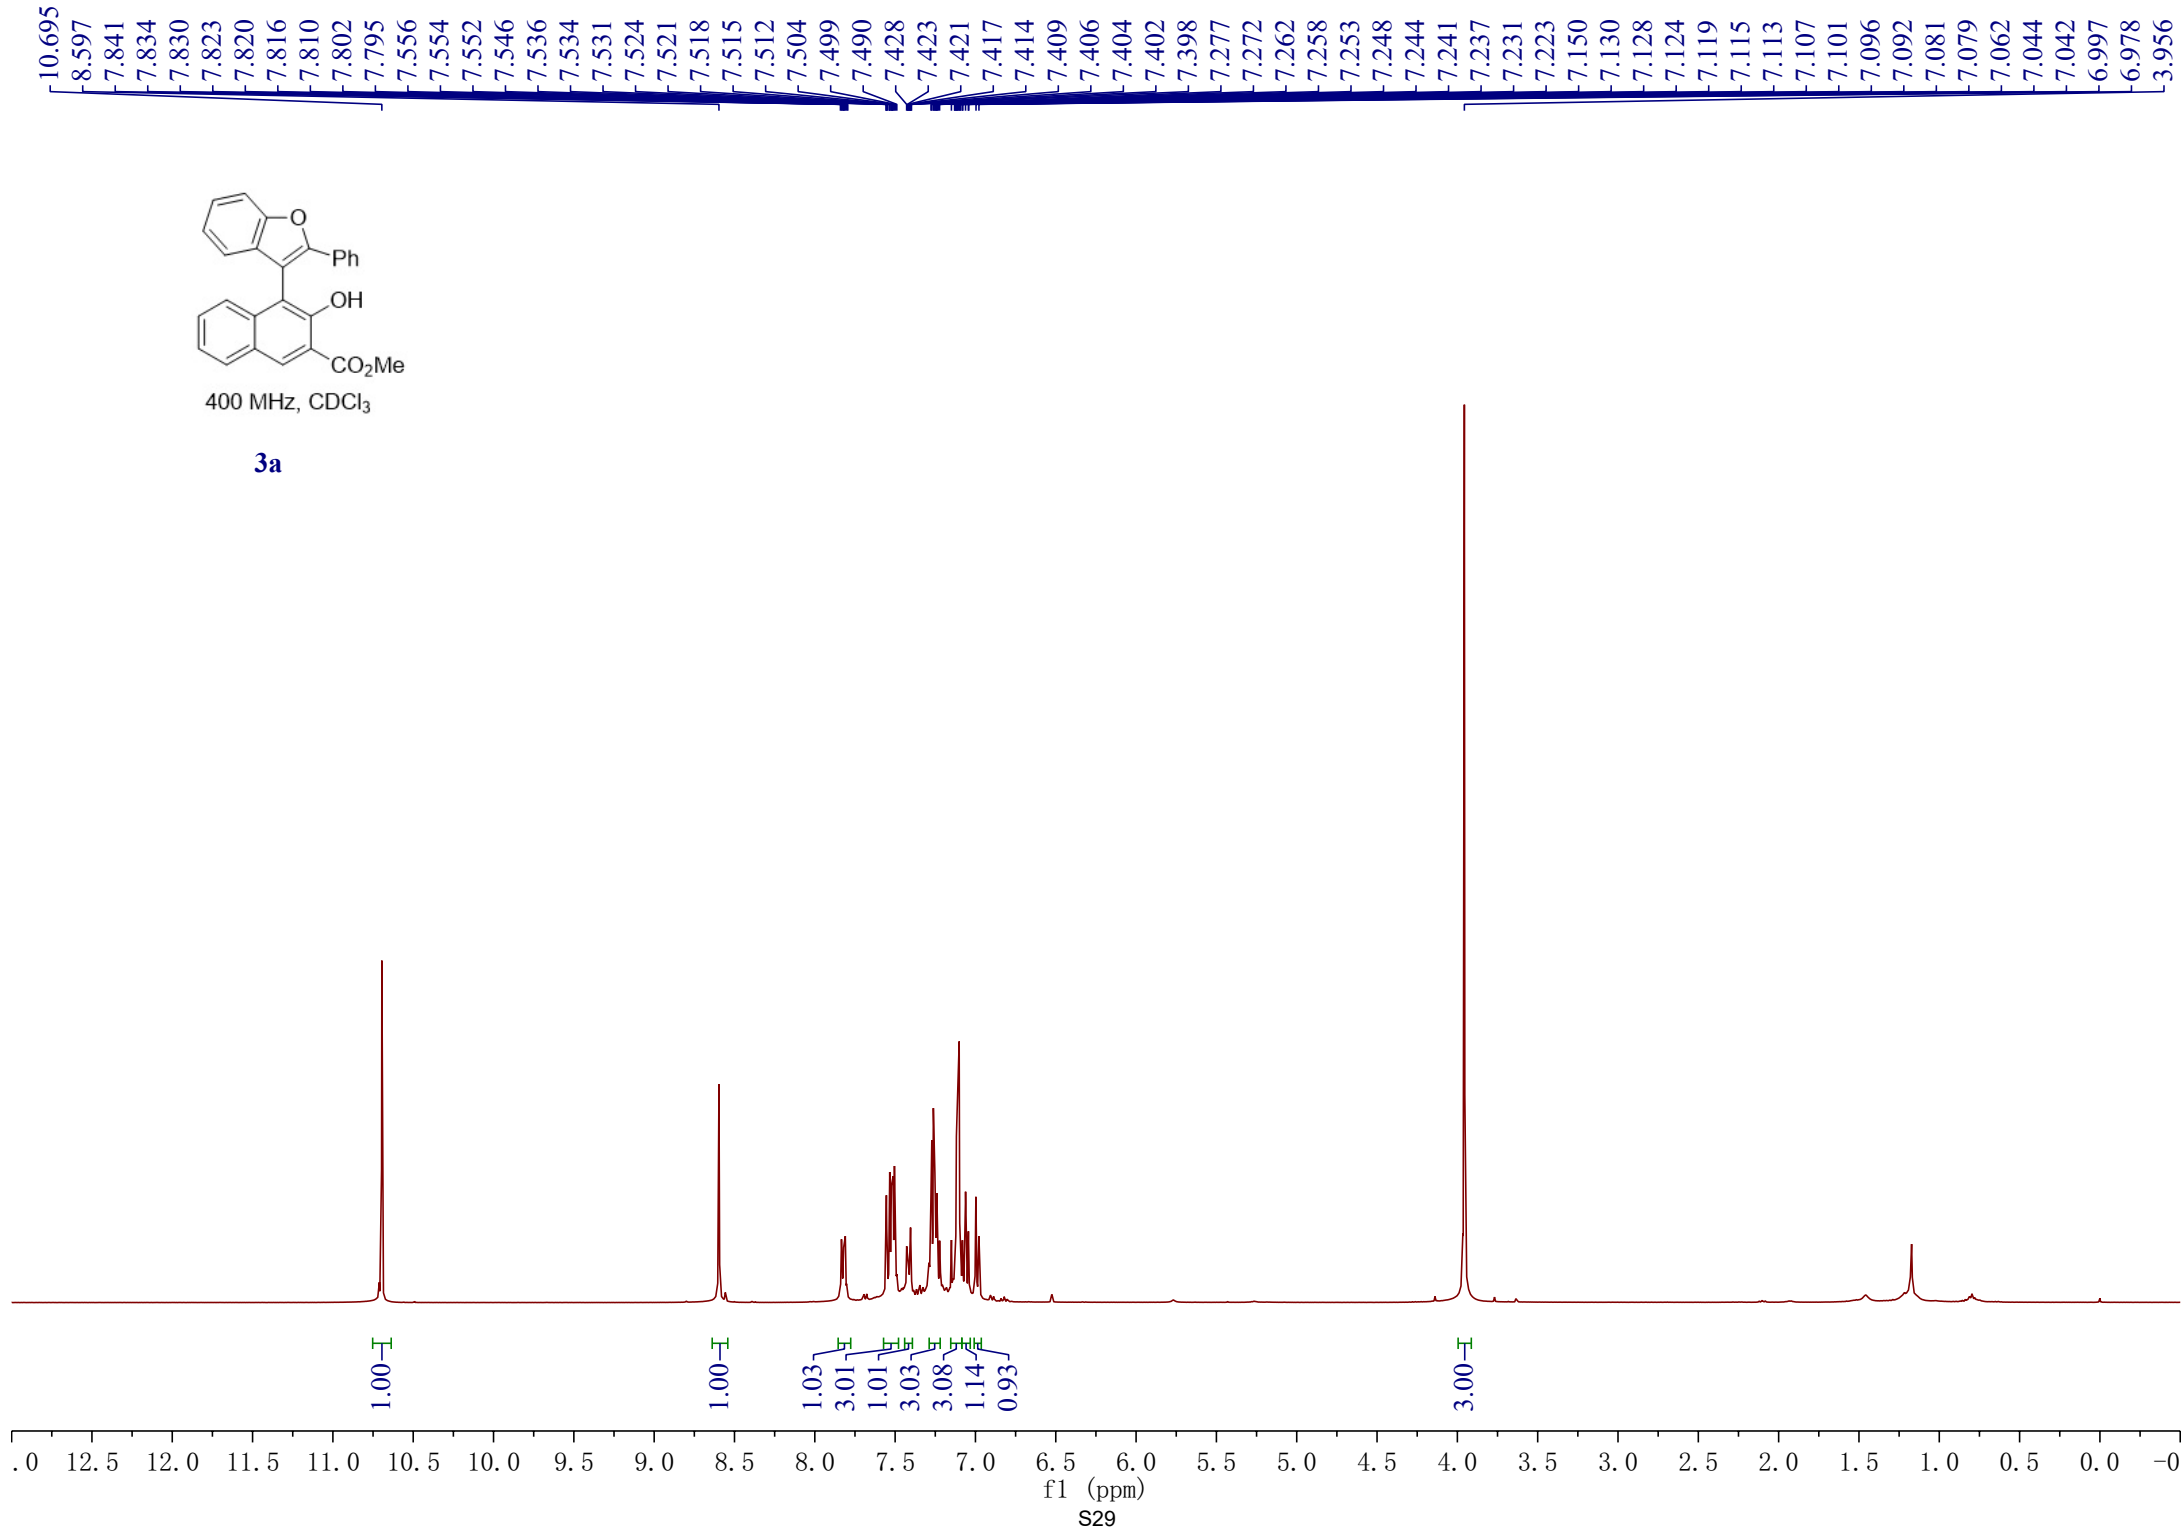

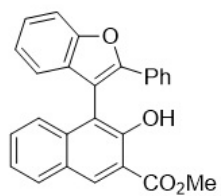

100 MHz, CDCl<sub>3</sub>

**3a**

—170.528

154.621  
154.291  
152.039  
136.887  
133.244  
131.032  
130.892  
129.909  
129.879  
128.635  
128.582  
128.308  
127.278  
125.995  
125.002  
124.776  
124.320  
122.946  
120.472  
114.313  
114.145  
111.373  
110.369

—52.941

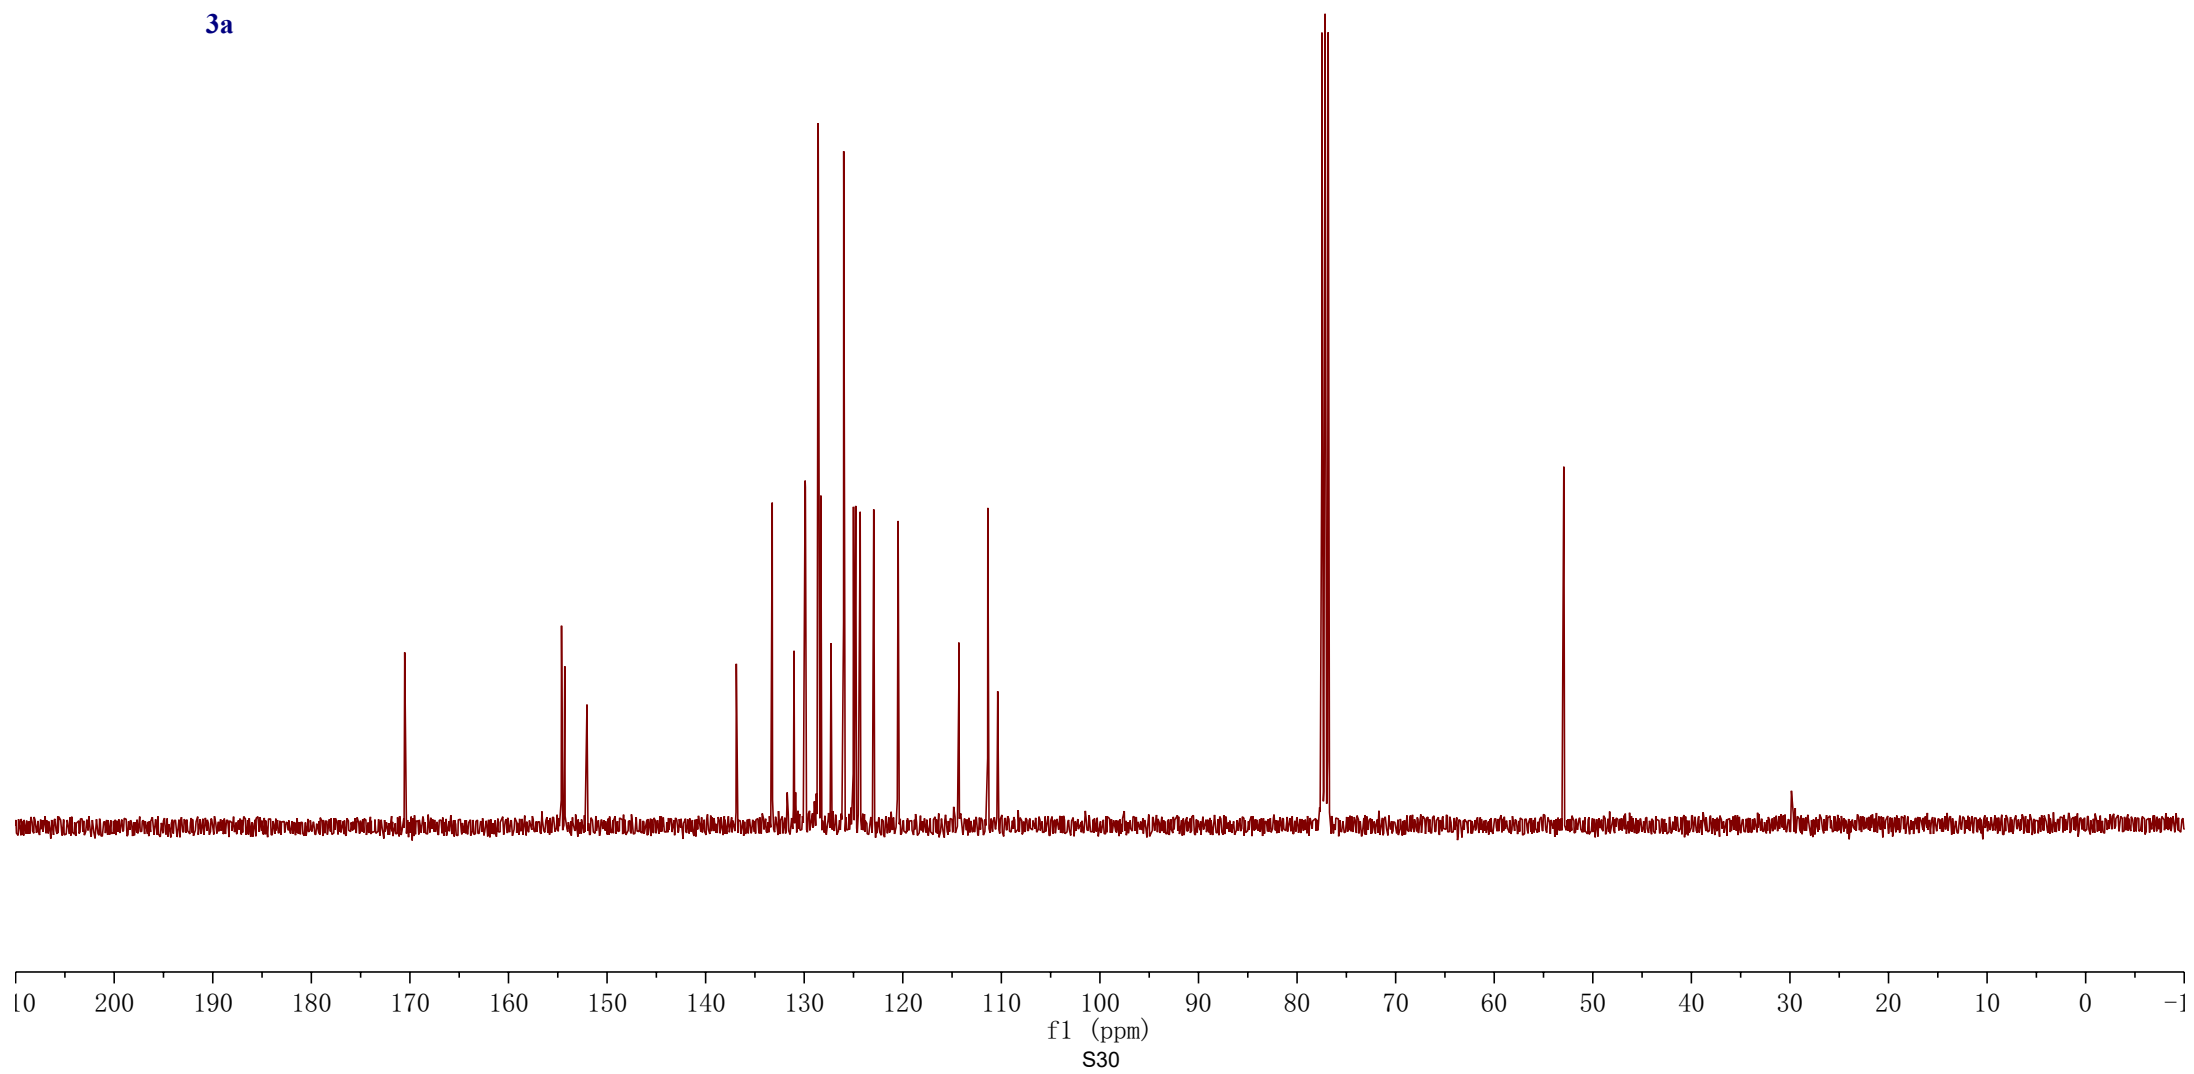



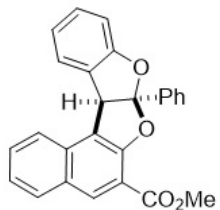

400 MHz, CDCl<sub>3</sub>

**3a'**

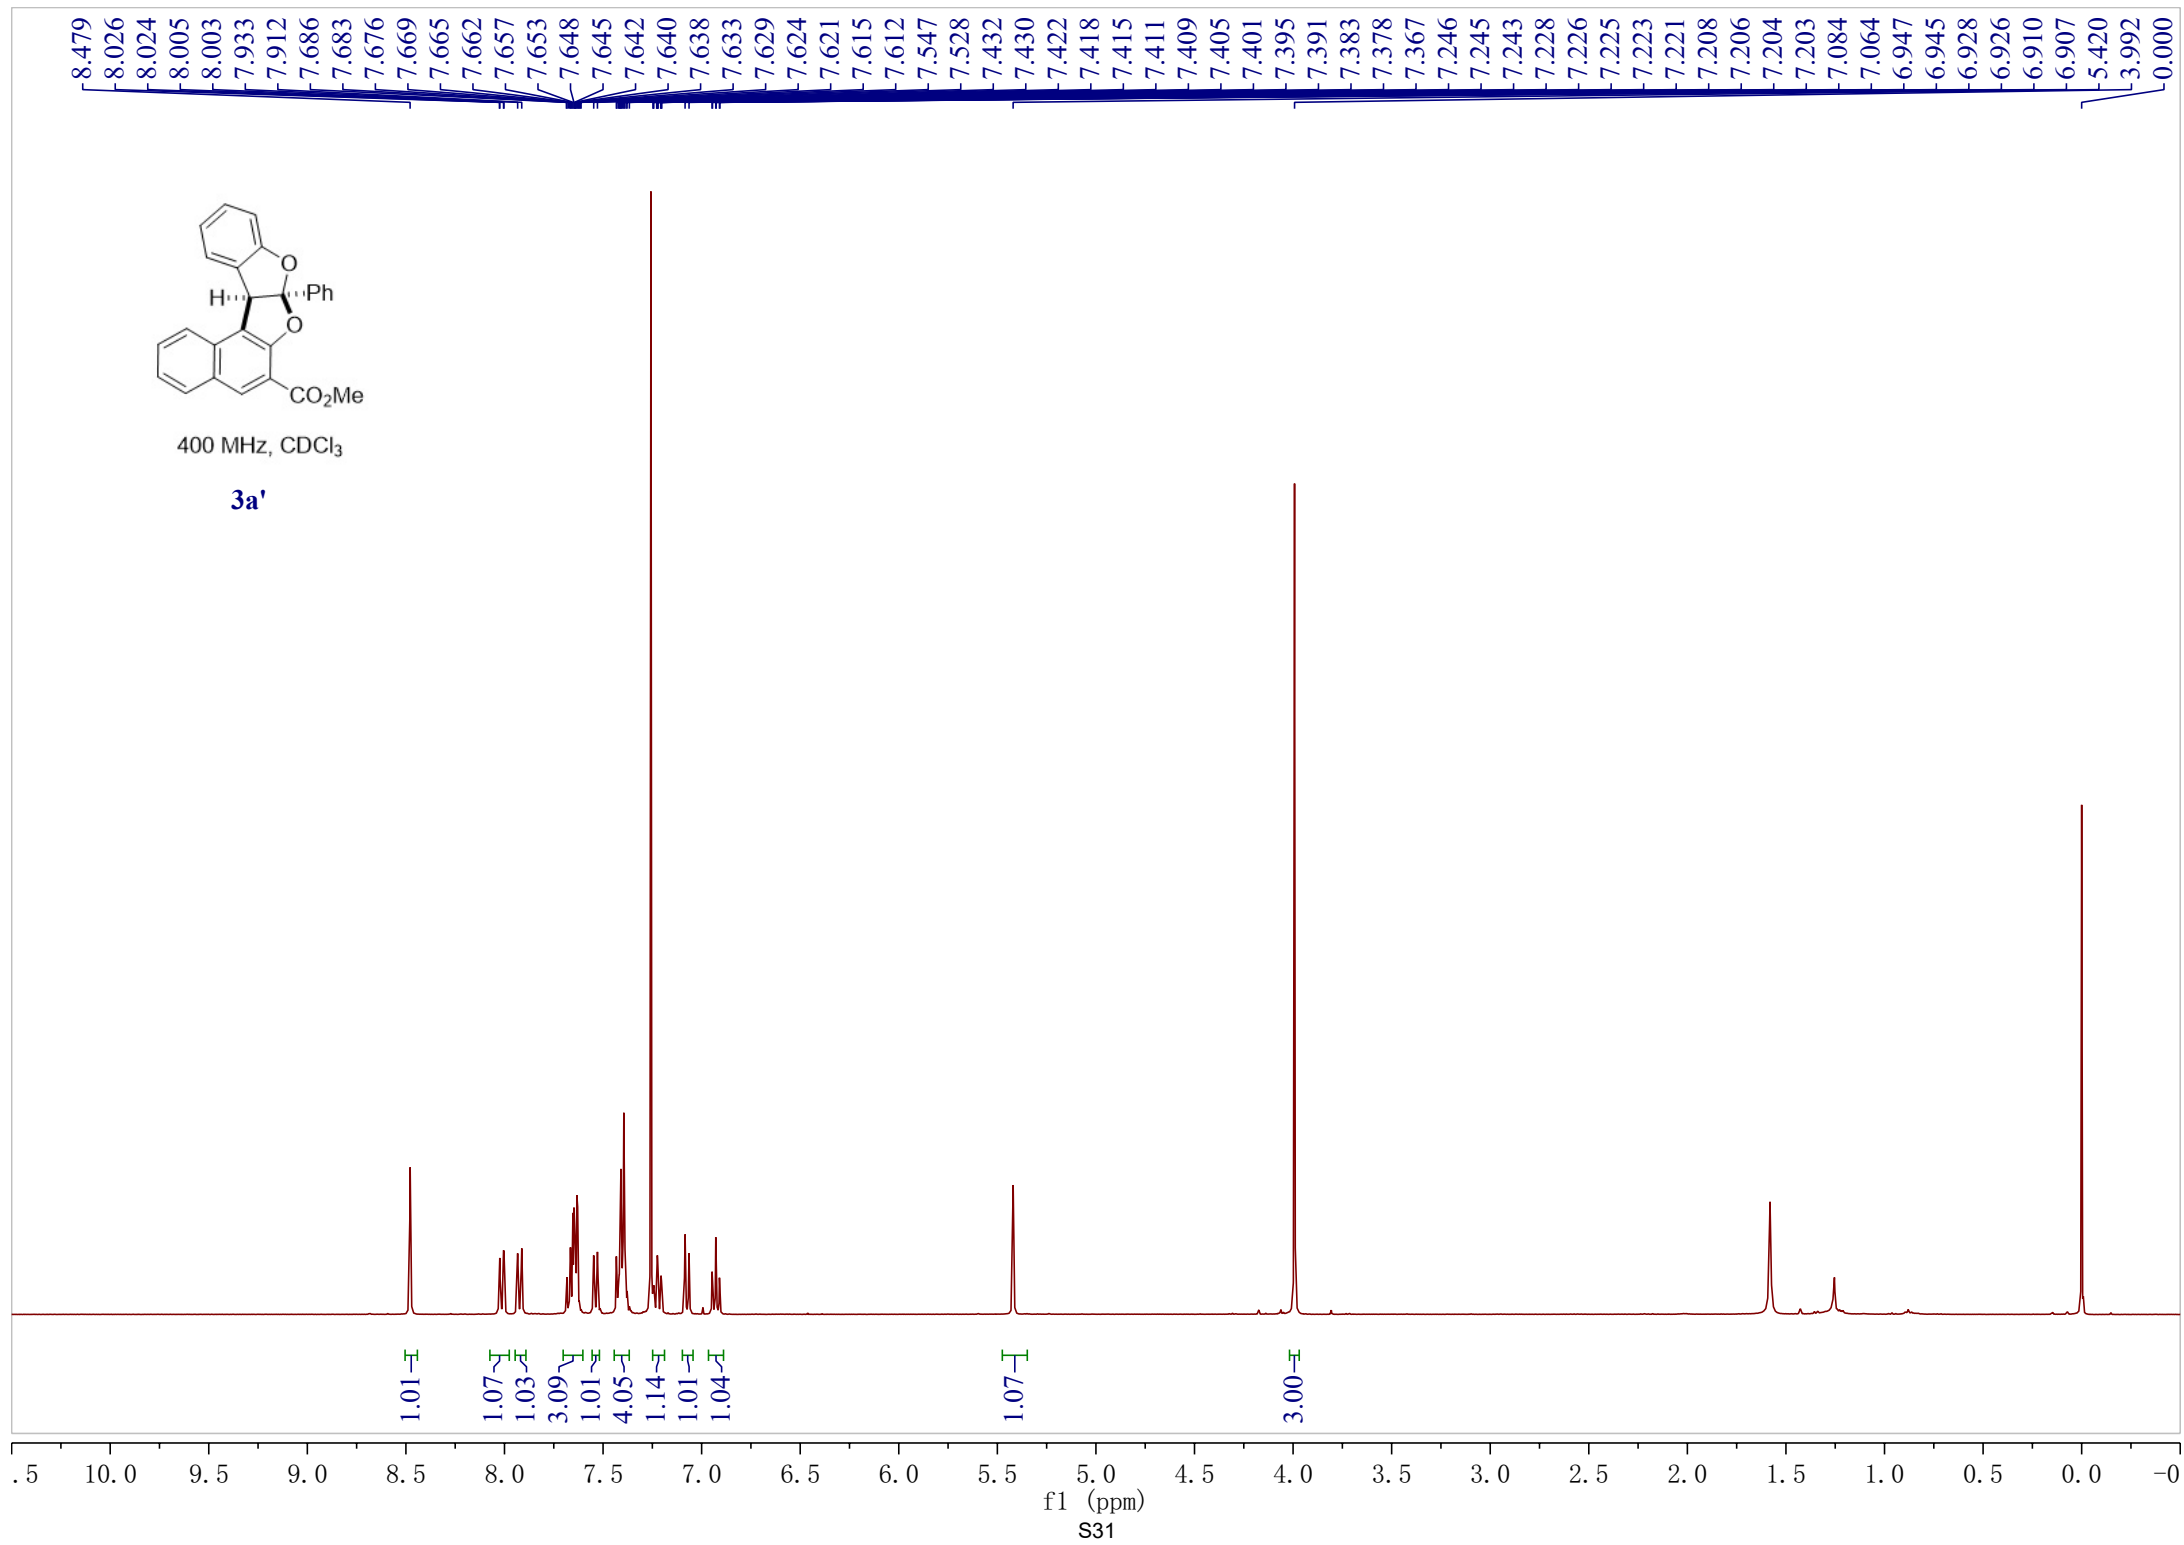

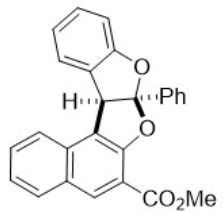

100 MHz, CDCl<sub>3</sub>

**3a'**

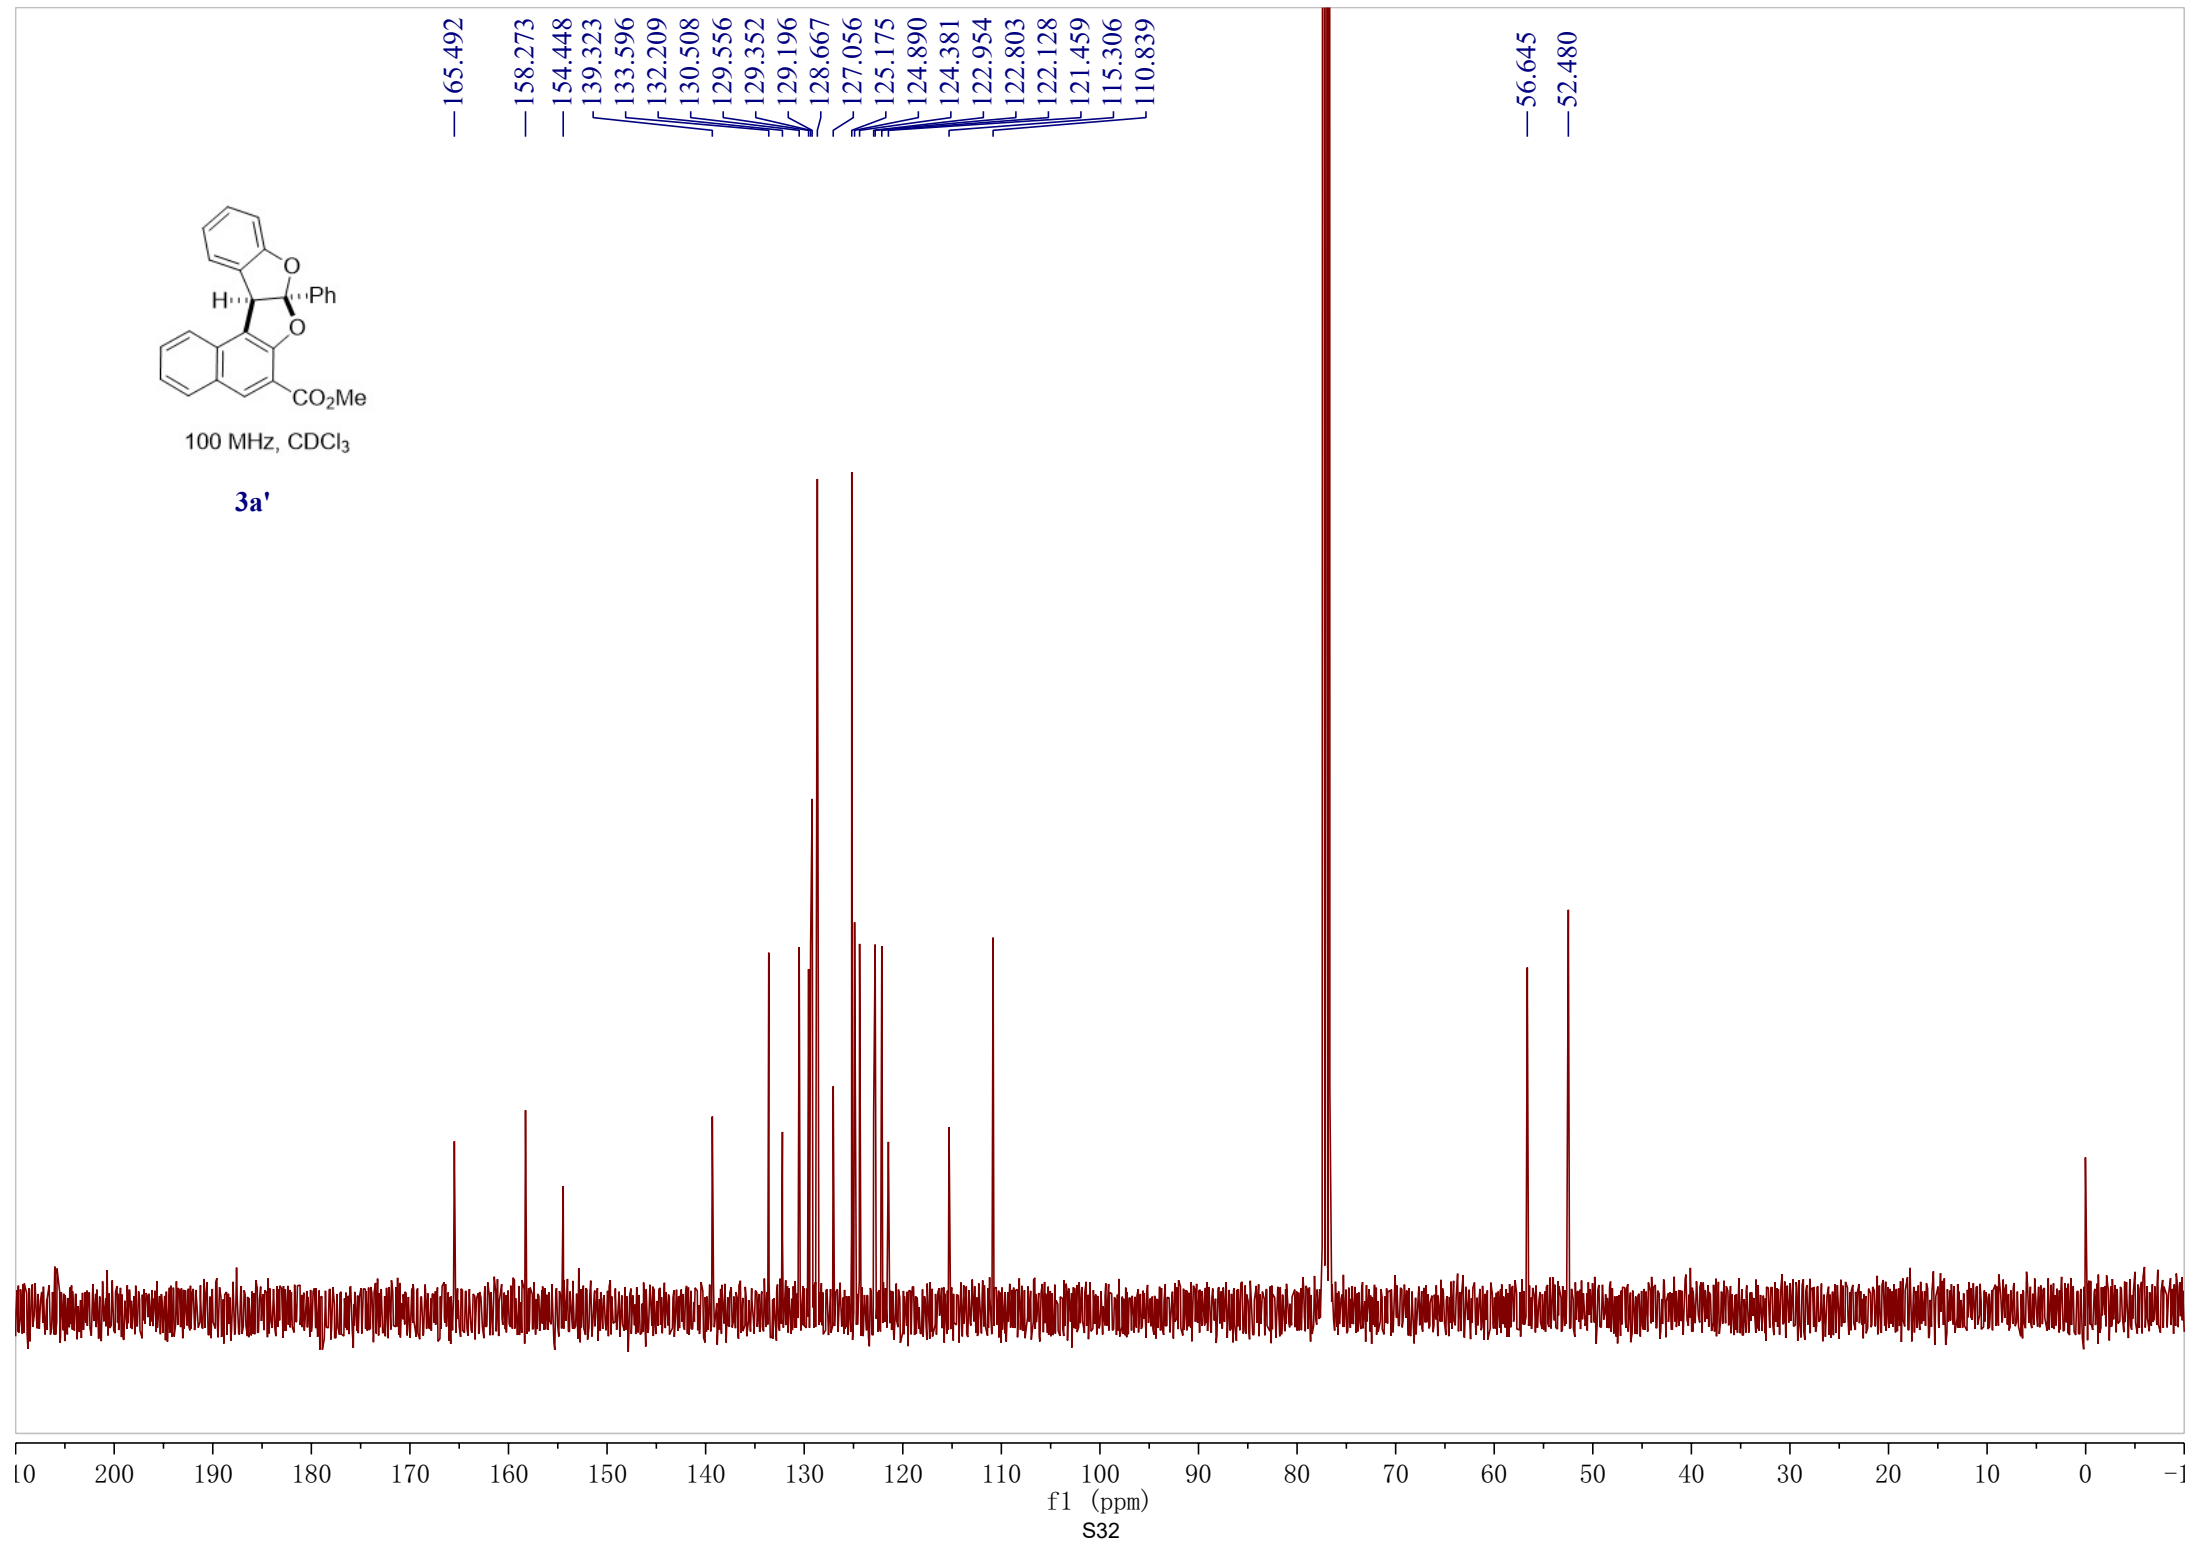

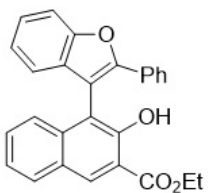

400 MHz, CDCl<sub>3</sub>

**3b**

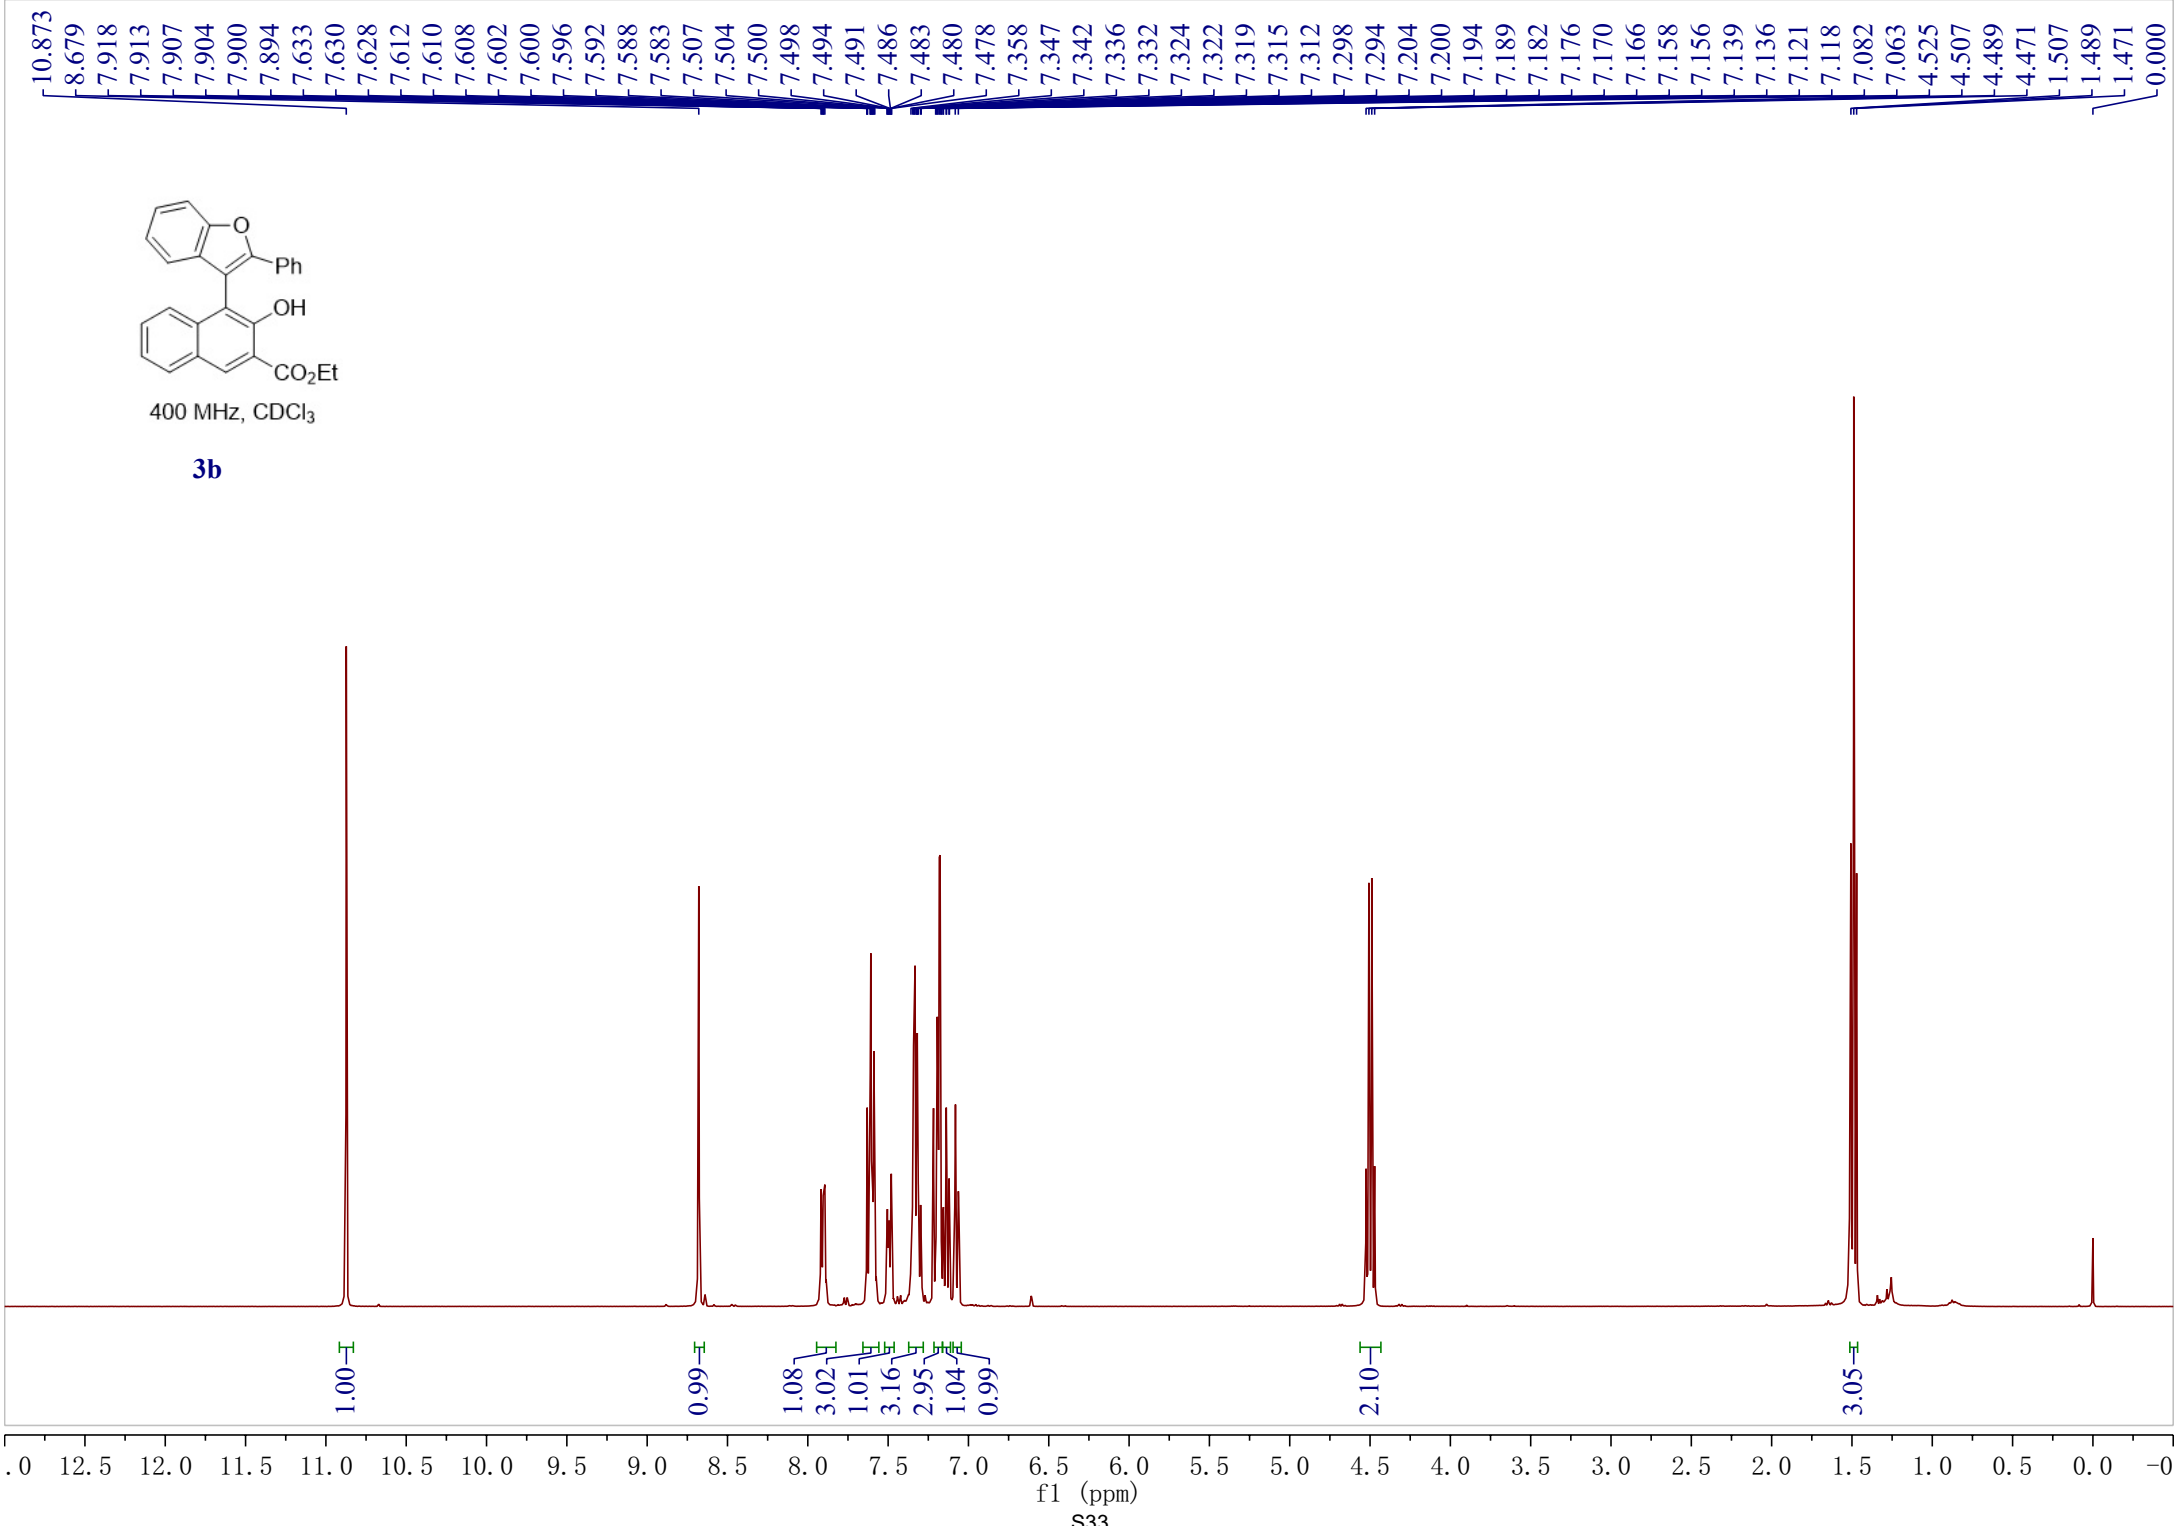

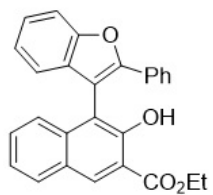

100 MHz, CDCl<sub>3</sub>

**3b**

170.086  
154.723  
154.261  
151.989  
136.798  
133.098  
131.015  
130.888  
129.838  
129.754  
128.531  
128.247  
127.230  
125.963  
124.921  
124.726  
124.217  
122.897  
120.449  
114.522  
114.035  
111.319  
110.417  
62.143  
14.356

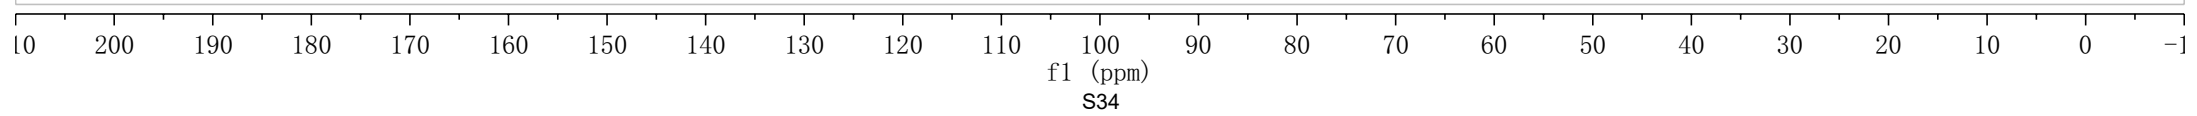

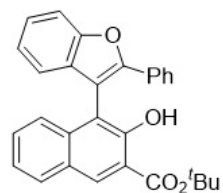

400 MHz, CDCl<sub>3</sub>

3c

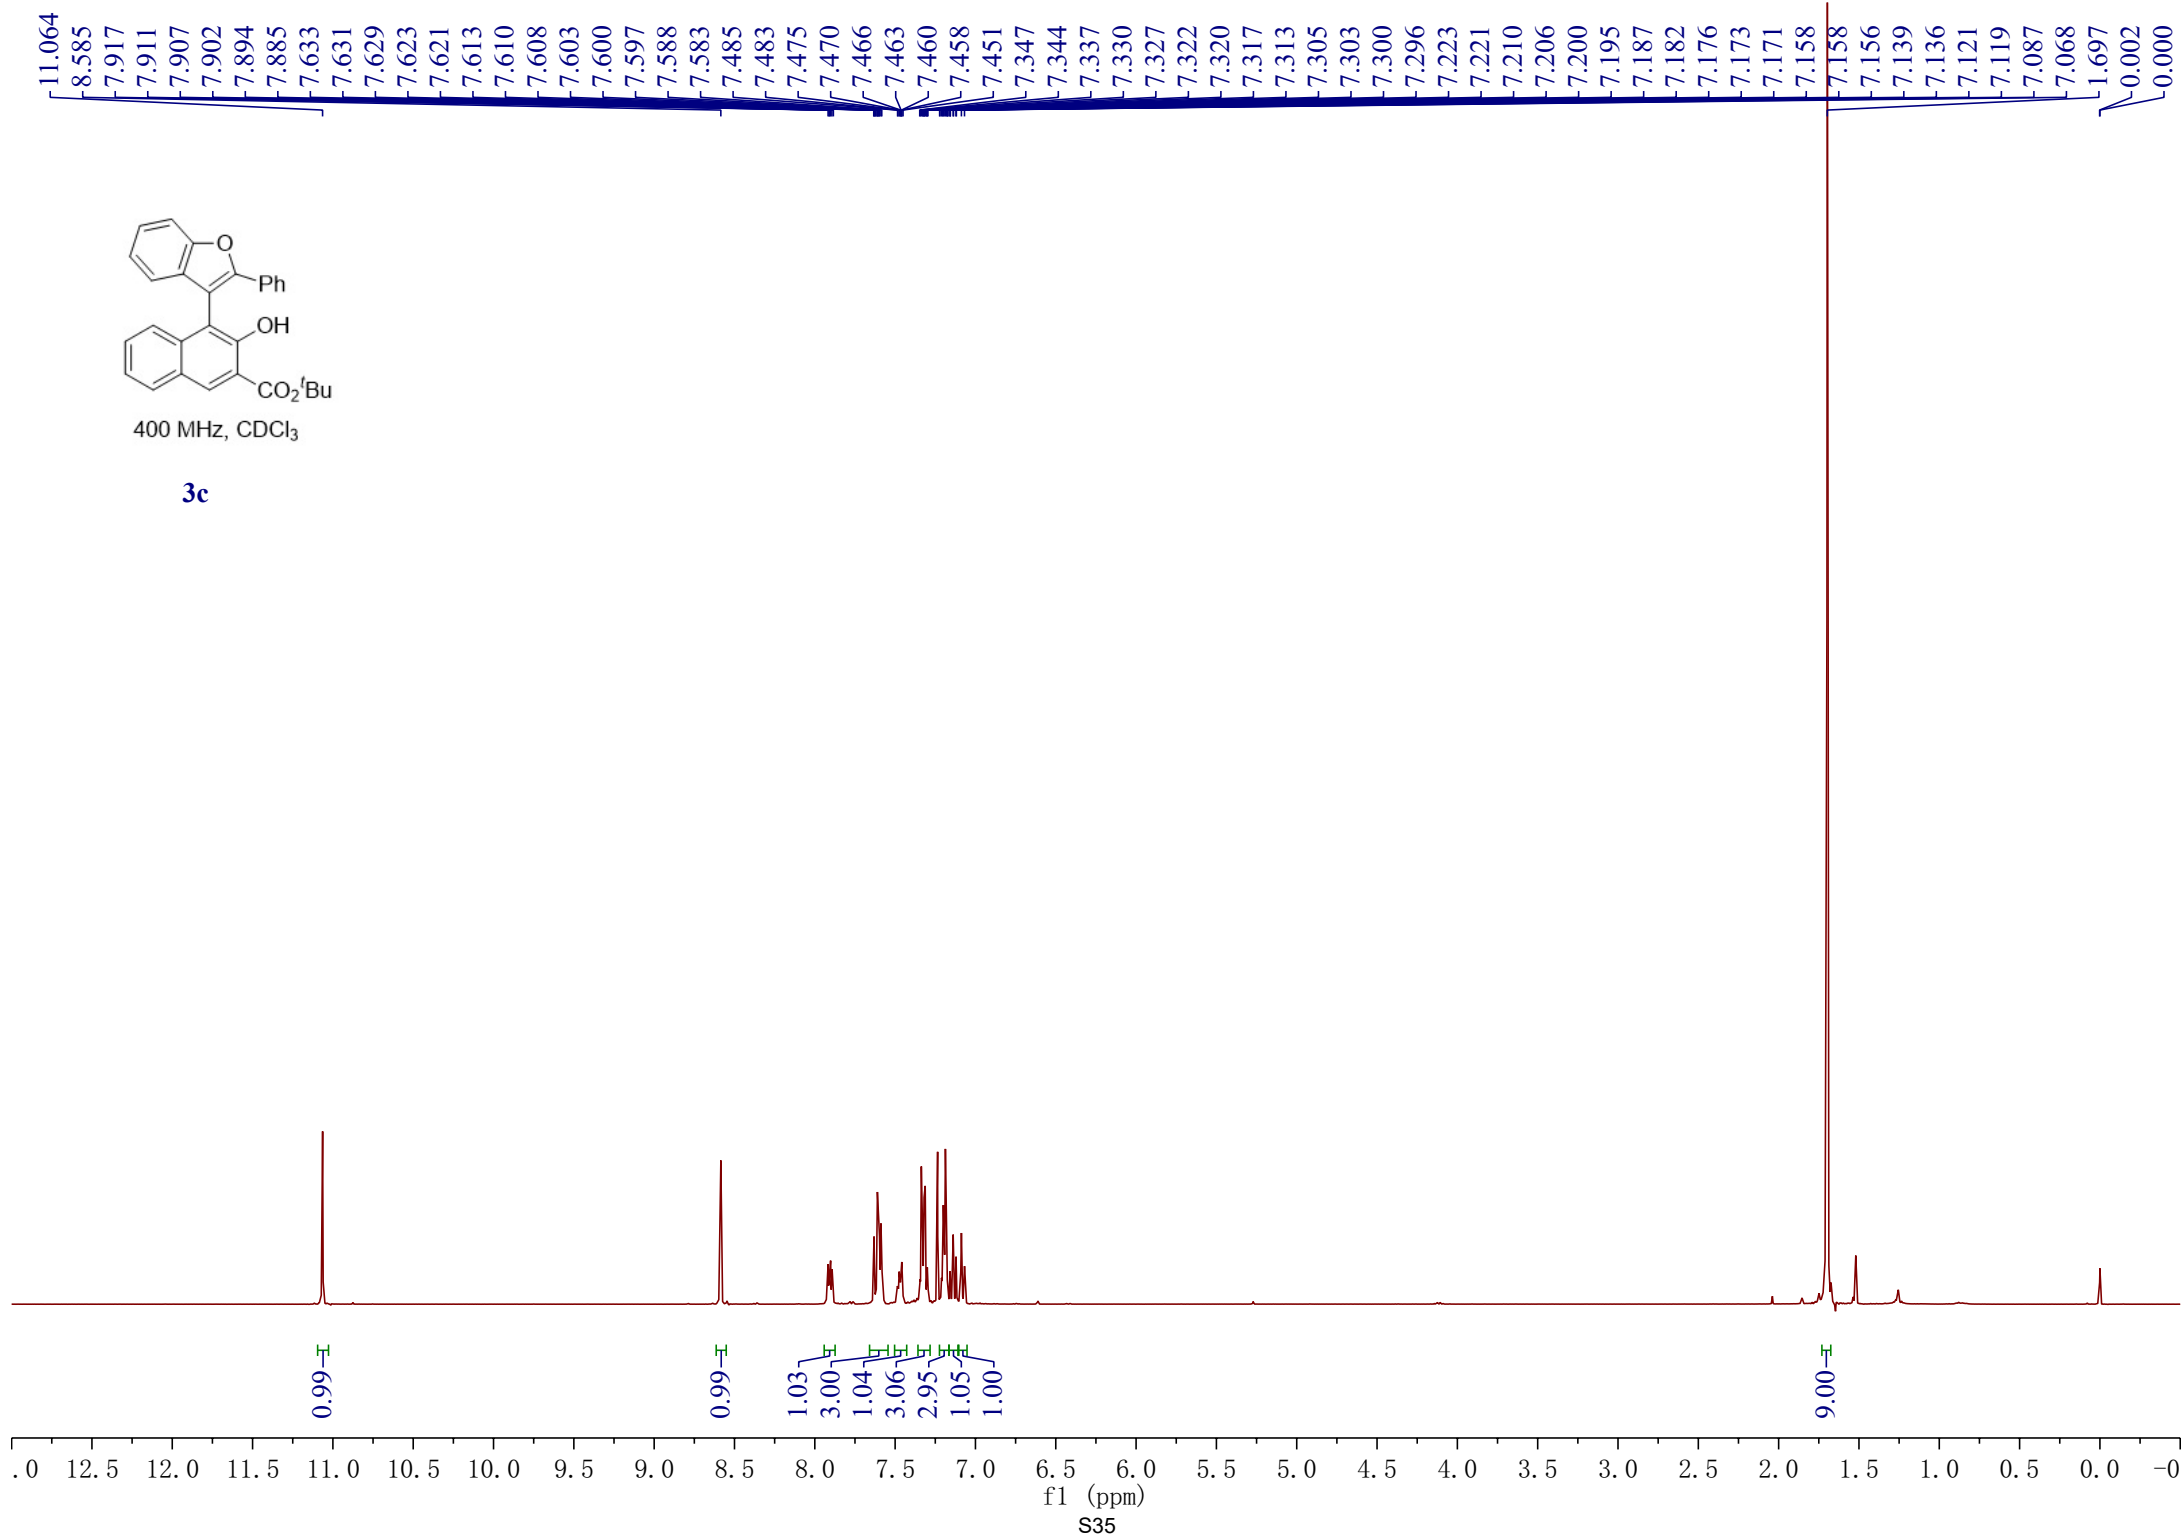

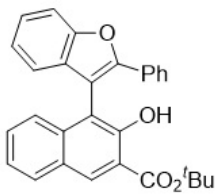

100 MHz, CDCl<sub>3</sub>

**3c**

—169.634  
155.088  
154.313  
151.970  
136.656  
133.109  
131.101  
130.999  
129.797  
129.560  
128.567  
128.239  
127.205  
126.033  
124.901  
124.732  
124.095  
122.902  
120.543  
115.783  
113.897  
111.348  
110.632  
—83.836  
—28.412

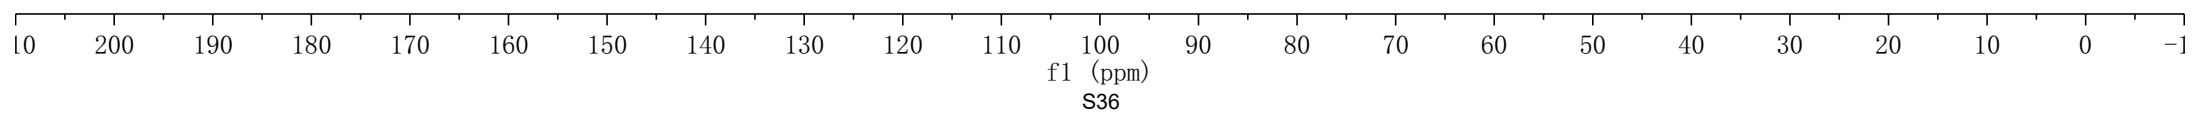

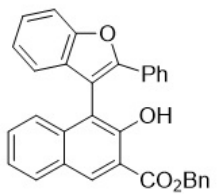

400 MHz, CDCl<sub>3</sub>

**3d**

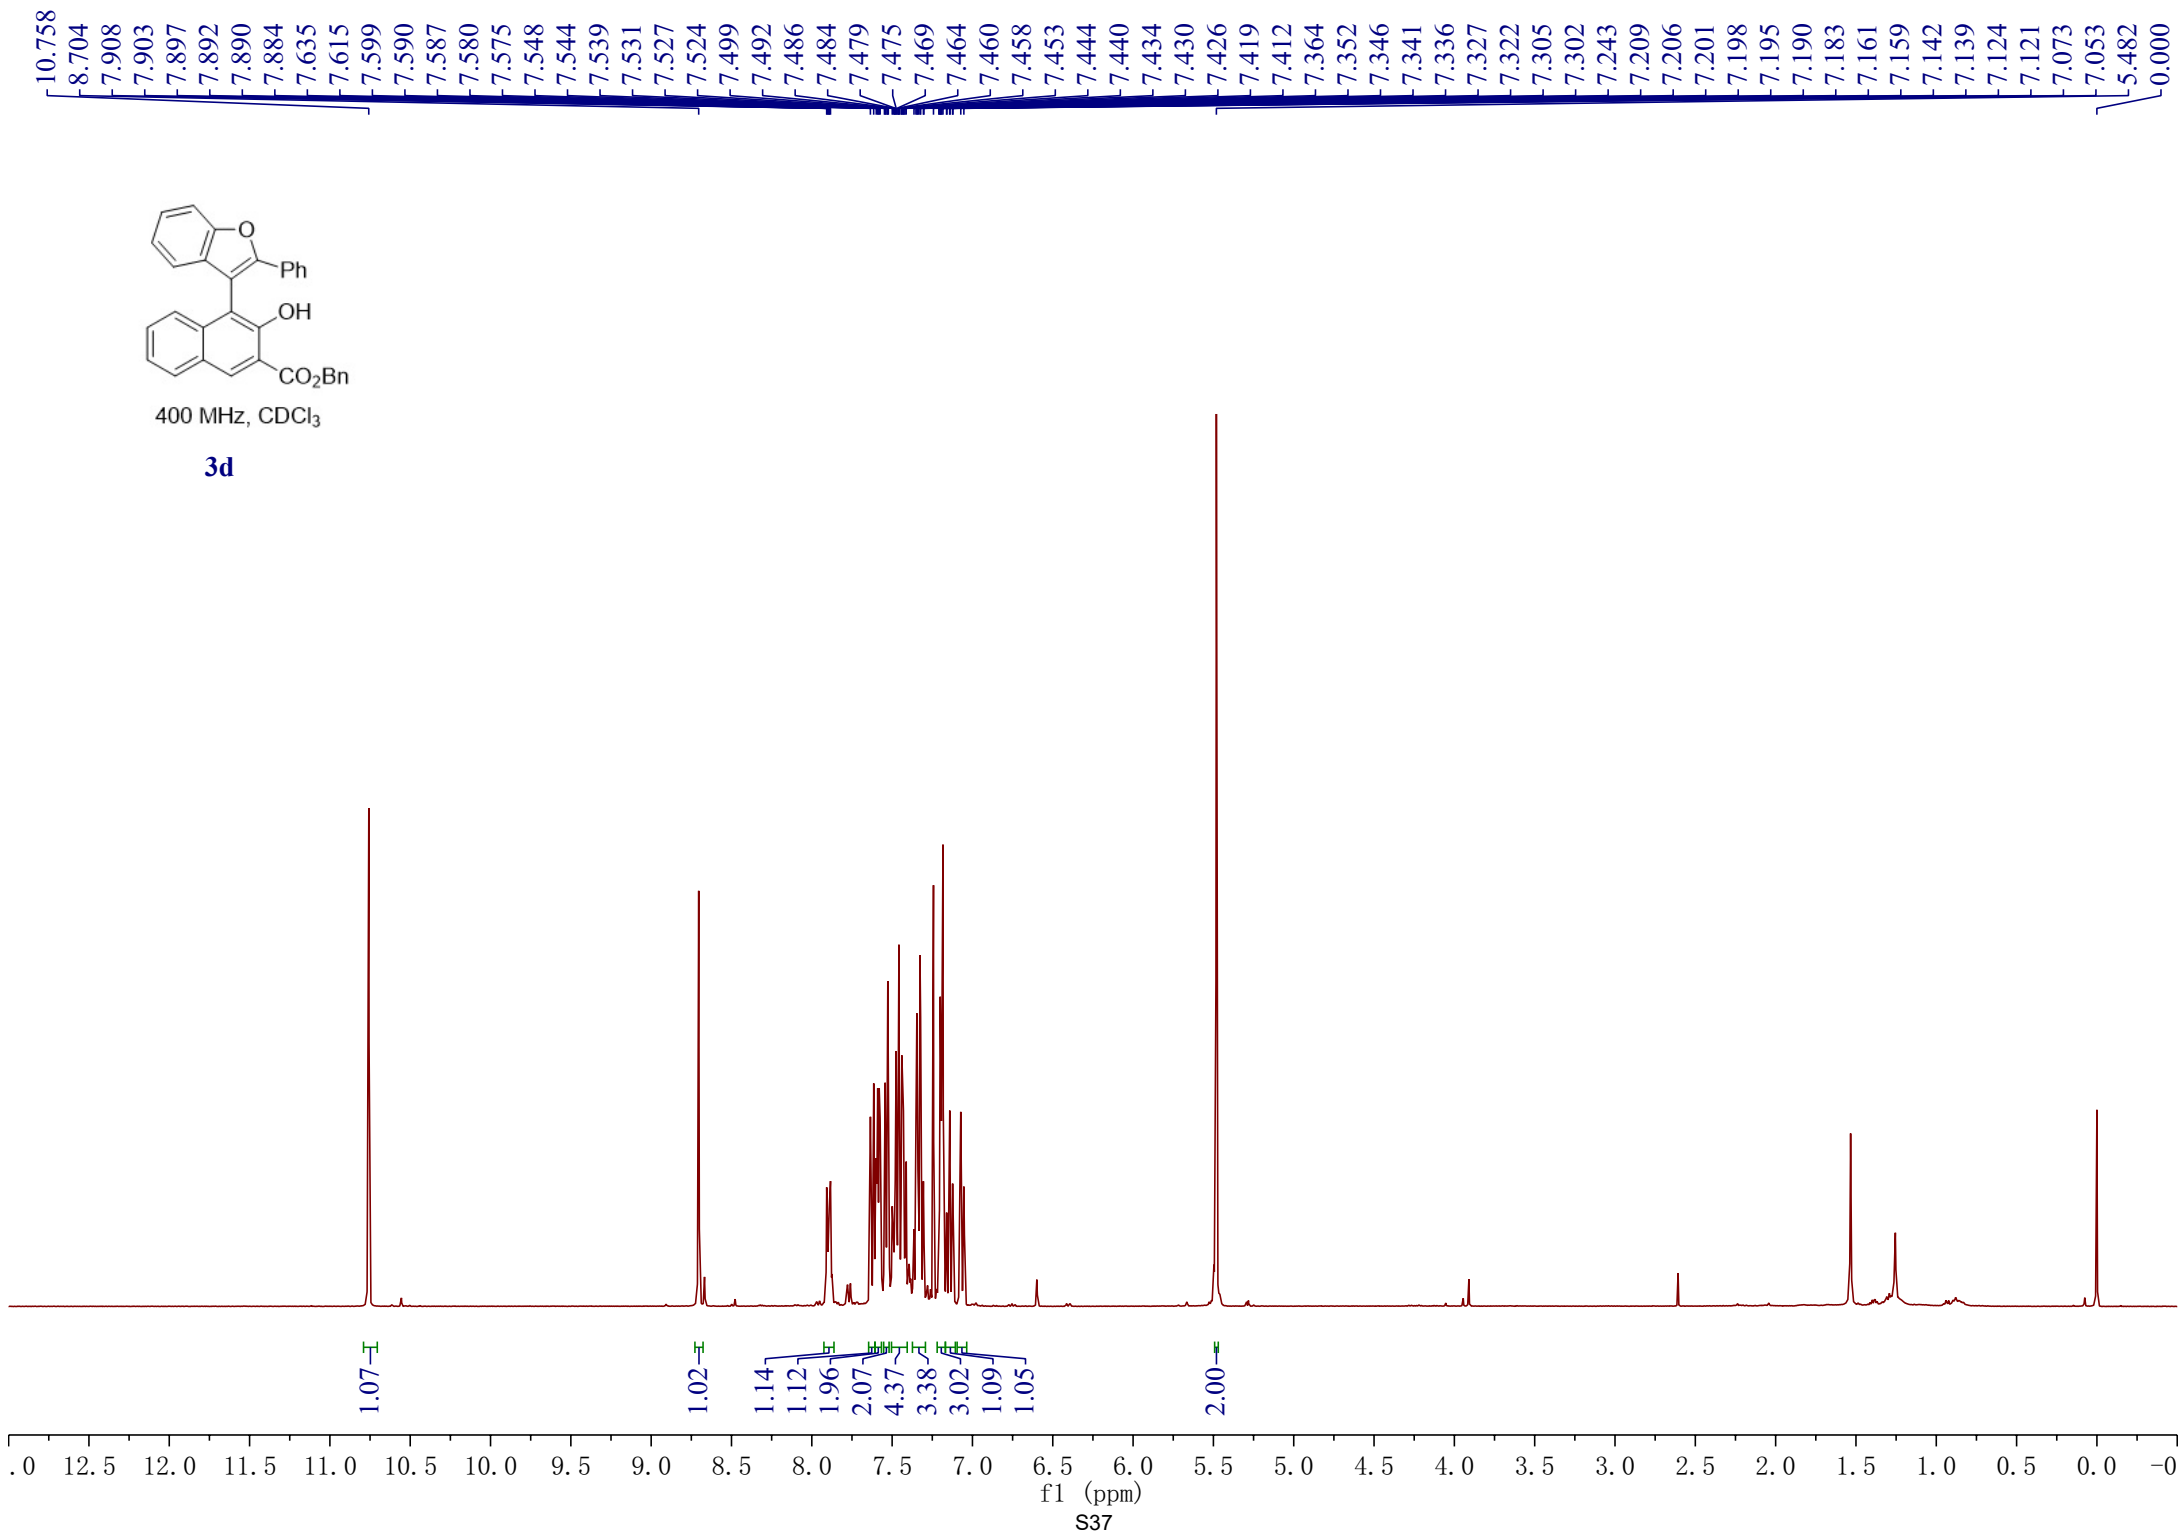

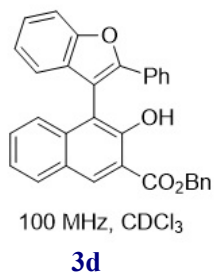

— 169.923  
154.725  
154.310  
152.057  
136.960  
135.216  
133.299  
131.044  
130.910  
129.925  
128.968  
128.930  
128.792  
128.594  
128.310  
127.286  
126.023  
125.090  
125.008  
124.776  
124.323  
122.949  
120.494  
114.341  
114.214  
111.376  
110.387  
— 67.735

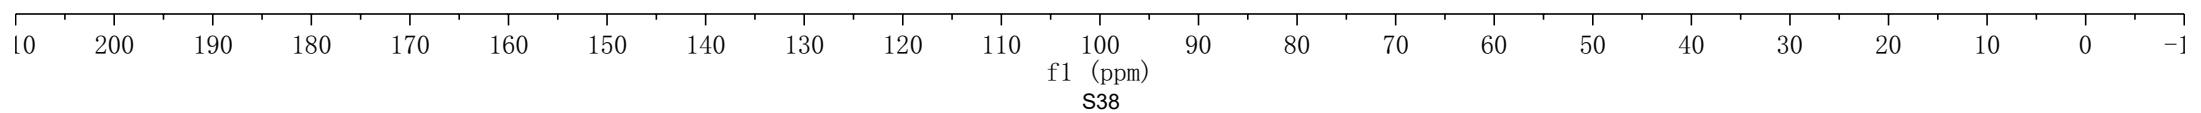



10.475  
8.940  
7.985  
7.980  
7.971  
7.967  
7.961  
7.641  
7.639  
7.631  
7.626  
7.619  
7.611  
7.606  
7.602  
7.550  
7.548  
7.541  
7.537  
7.528  
7.526  
7.523  
7.500  
7.495  
7.482  
7.479  
7.474  
7.465  
7.461  
7.408  
7.397  
7.392  
7.382  
7.373  
7.369  
7.357  
7.350  
7.347  
7.344  
7.331  
7.327  
7.324  
7.312  
7.309  
7.306  
7.301  
7.292  
7.290  
7.287  
7.285  
7.230  
7.228  
7.220  
7.215  
7.205  
7.201  
7.200  
7.193  
7.175  
7.173  
7.157  
7.153  
7.138  
7.136  
7.110  
7.091

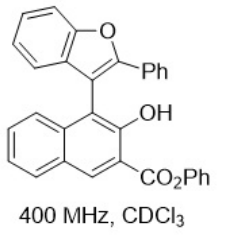

3e

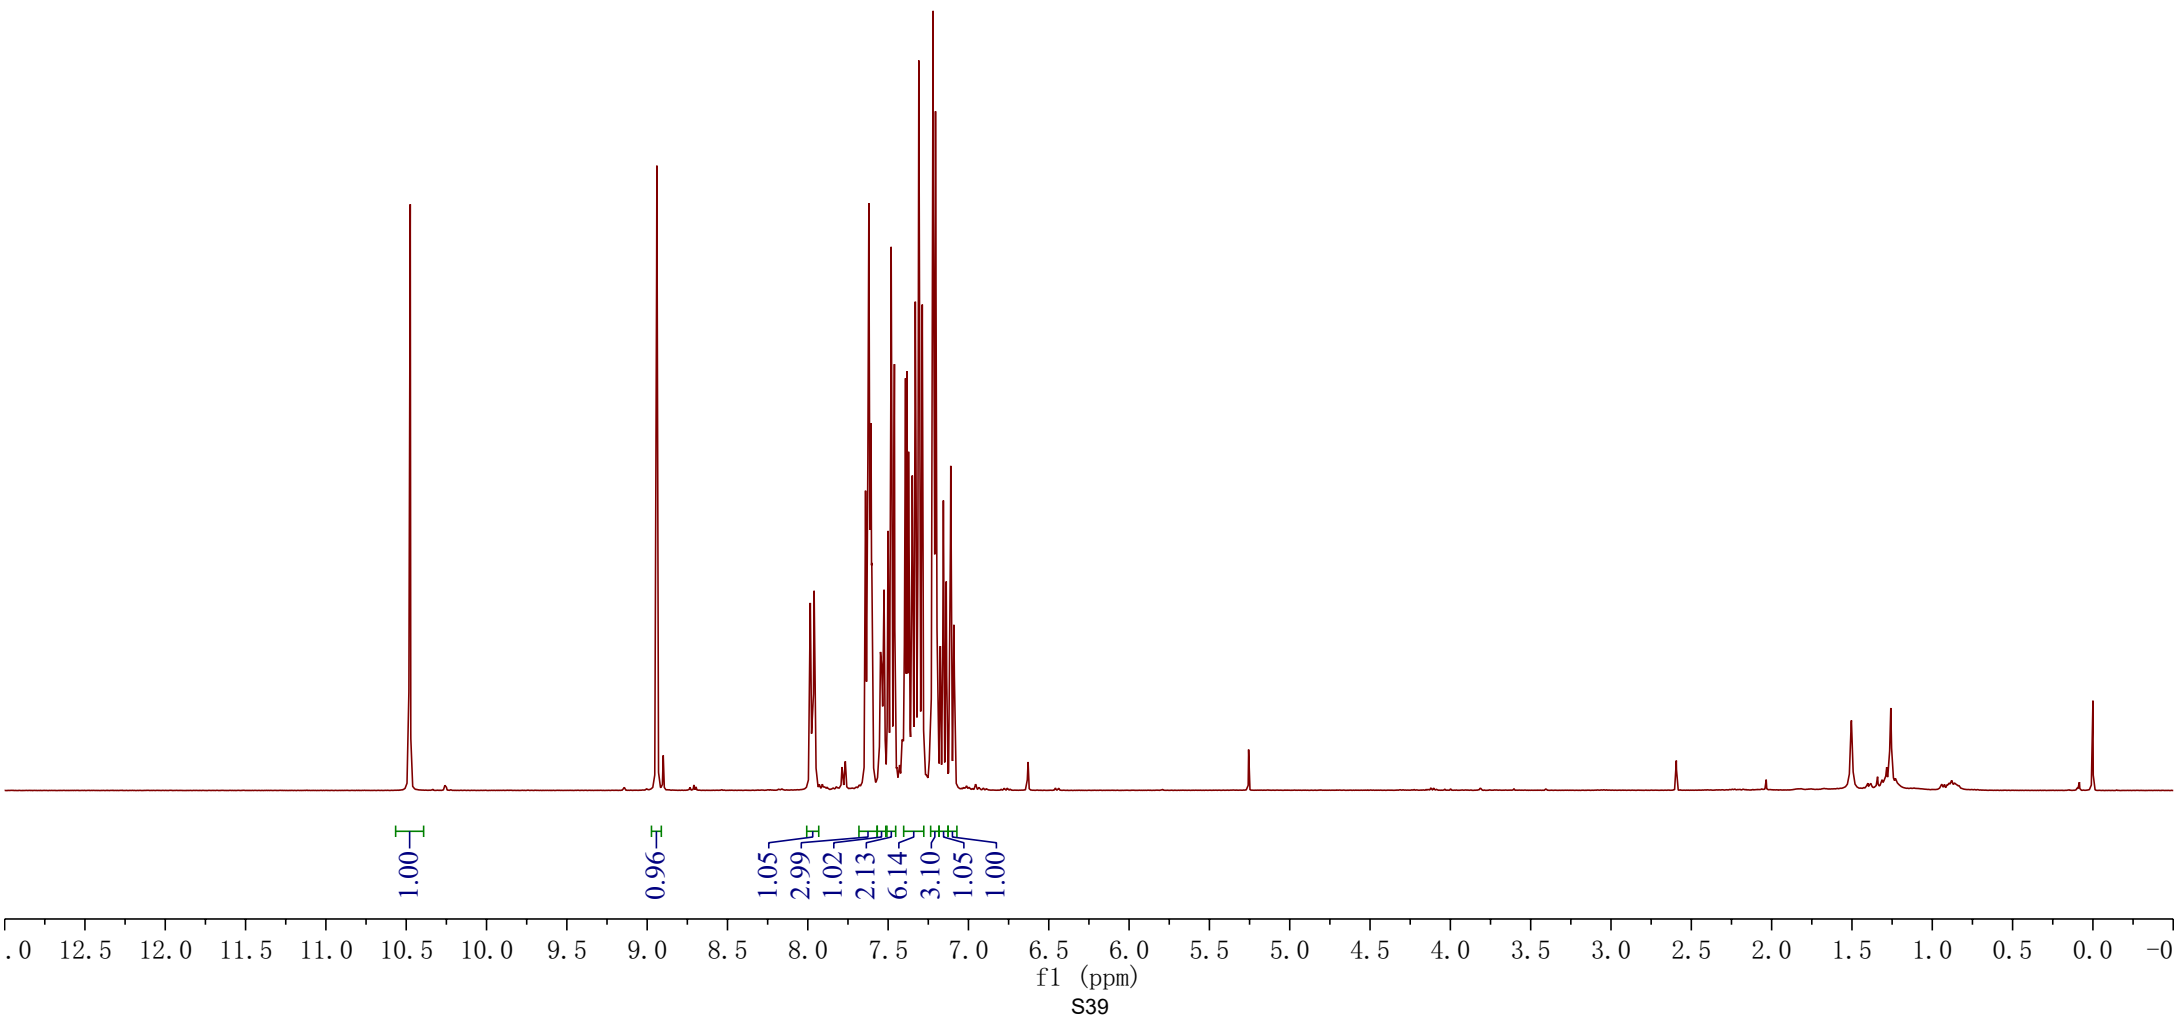

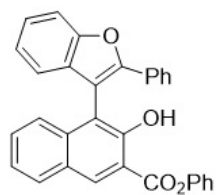

100 MHz, CDCl<sub>3</sub>

**3e**

168.838  
154.709  
154.225  
152.029  
150.154  
137.217  
133.859  
130.904  
130.756  
130.231  
129.997  
129.805  
128.523  
128.280  
127.290  
126.647  
125.954  
125.005  
124.737  
124.482  
122.897  
121.691  
120.352  
114.473  
113.696  
111.317  
110.139

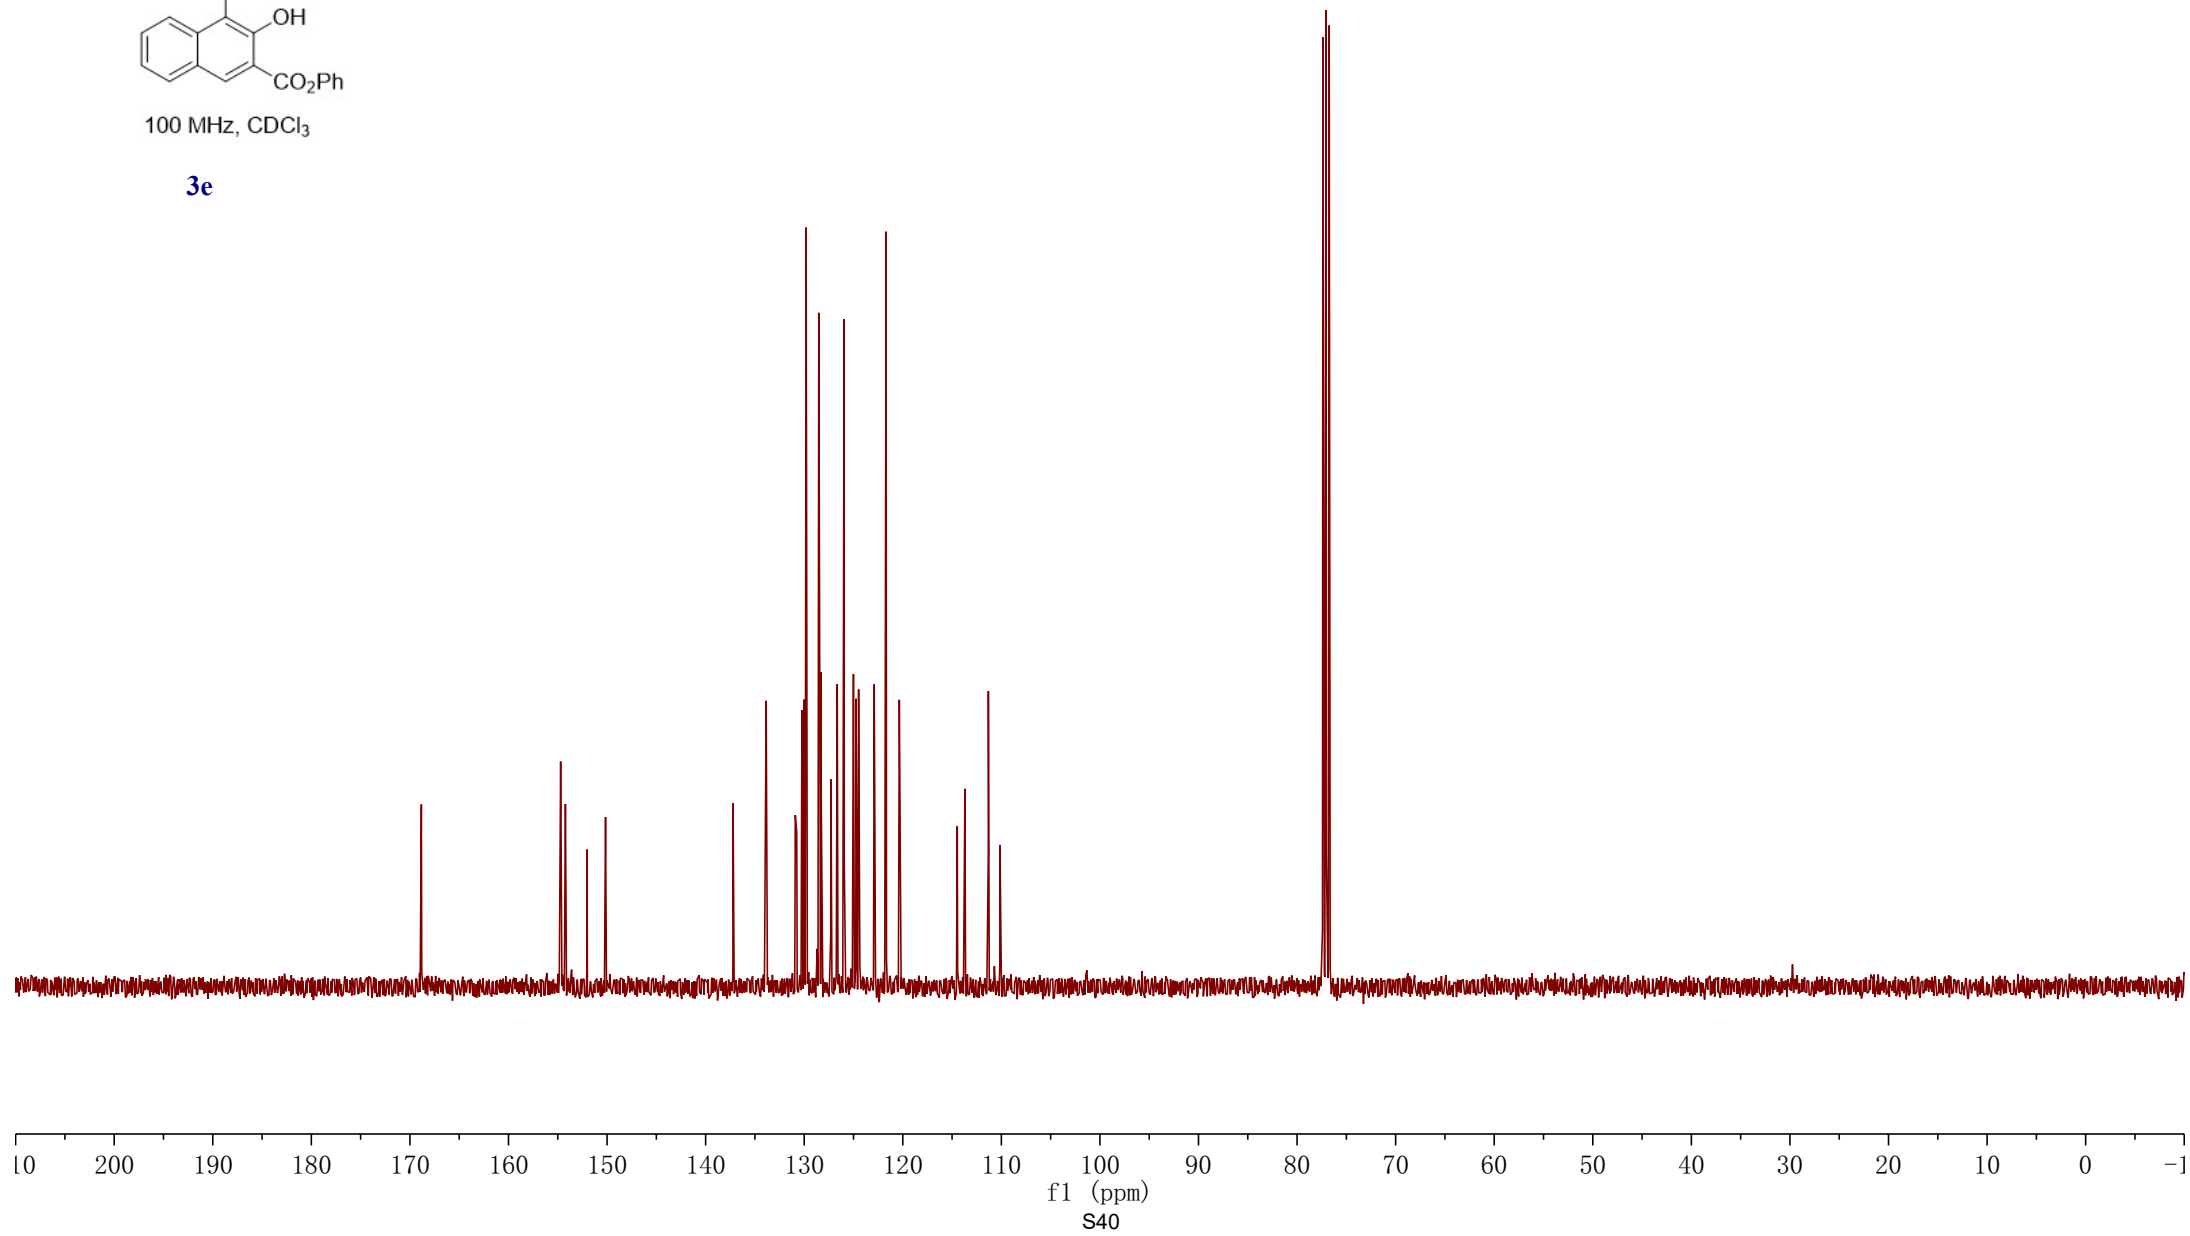

8.028  
7.806  
7.804  
7.802  
7.786  
7.783  
7.781  
7.661  
7.659  
7.656  
7.640  
7.638  
7.636  
7.583  
7.577  
7.571  
7.568  
7.564  
7.561  
7.558  
7.556  
7.468  
7.466  
7.447  
7.444  
7.390  
7.387  
7.384  
7.380  
7.373  
7.370  
7.366  
7.363  
7.360  
7.353  
7.350  
7.345  
7.342  
7.305  
7.302  
7.288  
7.284  
7.281  
7.267  
7.264  
7.245  
7.240  
7.236  
7.232  
7.229  
7.224  
7.221  
7.219  
7.213  
7.210  
7.188  
7.186  
7.170  
7.168  
7.166  
7.151  
7.148  
7.079  
7.059  
5.686  
0.000

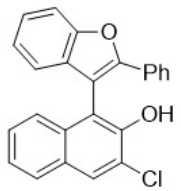

400 MHz, CDCl<sub>3</sub>

**3f**

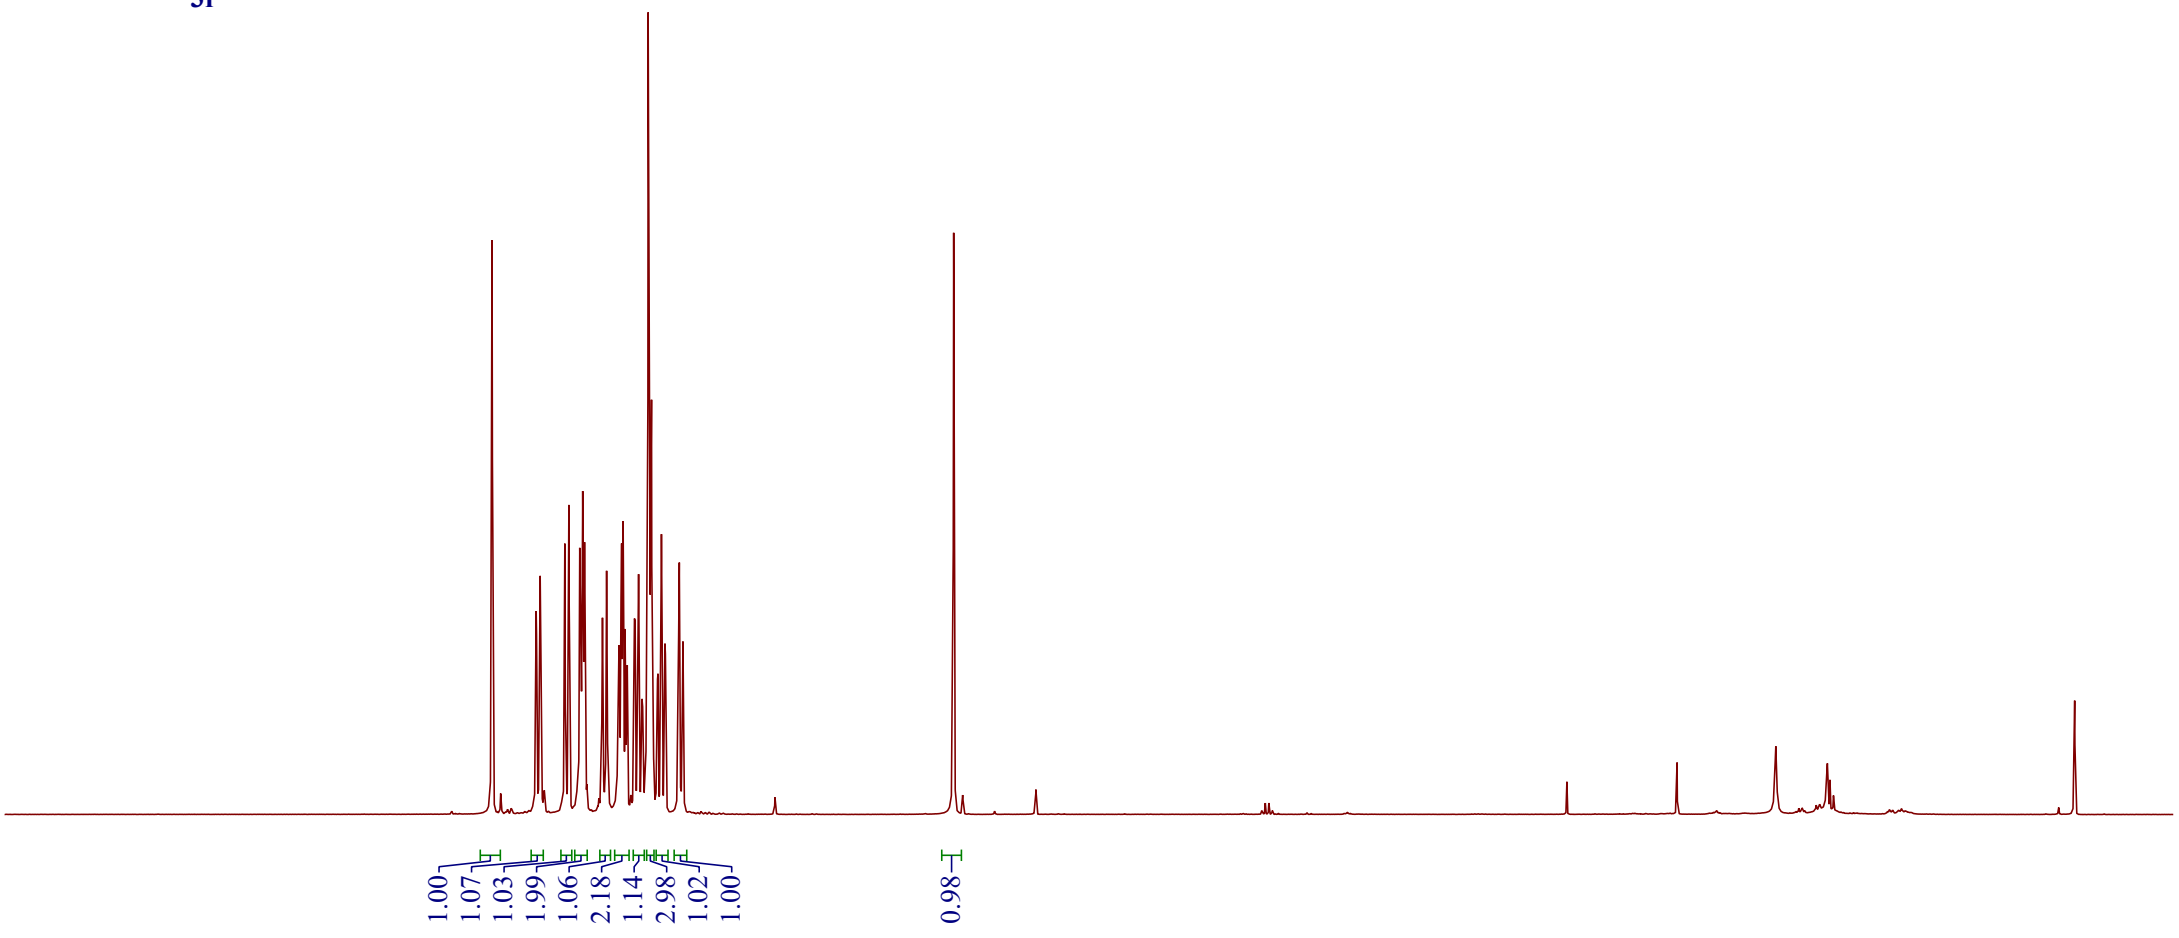

1.00  
1.07  
1.03  
1.99  
1.06  
2.18  
1.14  
2.98  
1.02  
1.00  
0.98  
f1 (ppm)  
S41

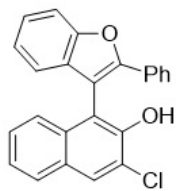

100 MHz, CDCl<sub>3</sub>

**3f**

154.344  
152.650  
147.400  
132.084  
130.146  
130.100  
129.139  
129.057  
128.876  
128.745  
127.449  
127.273  
125.944  
125.283  
124.991  
124.821  
123.325  
122.174  
120.427  
113.280  
111.420  
108.784

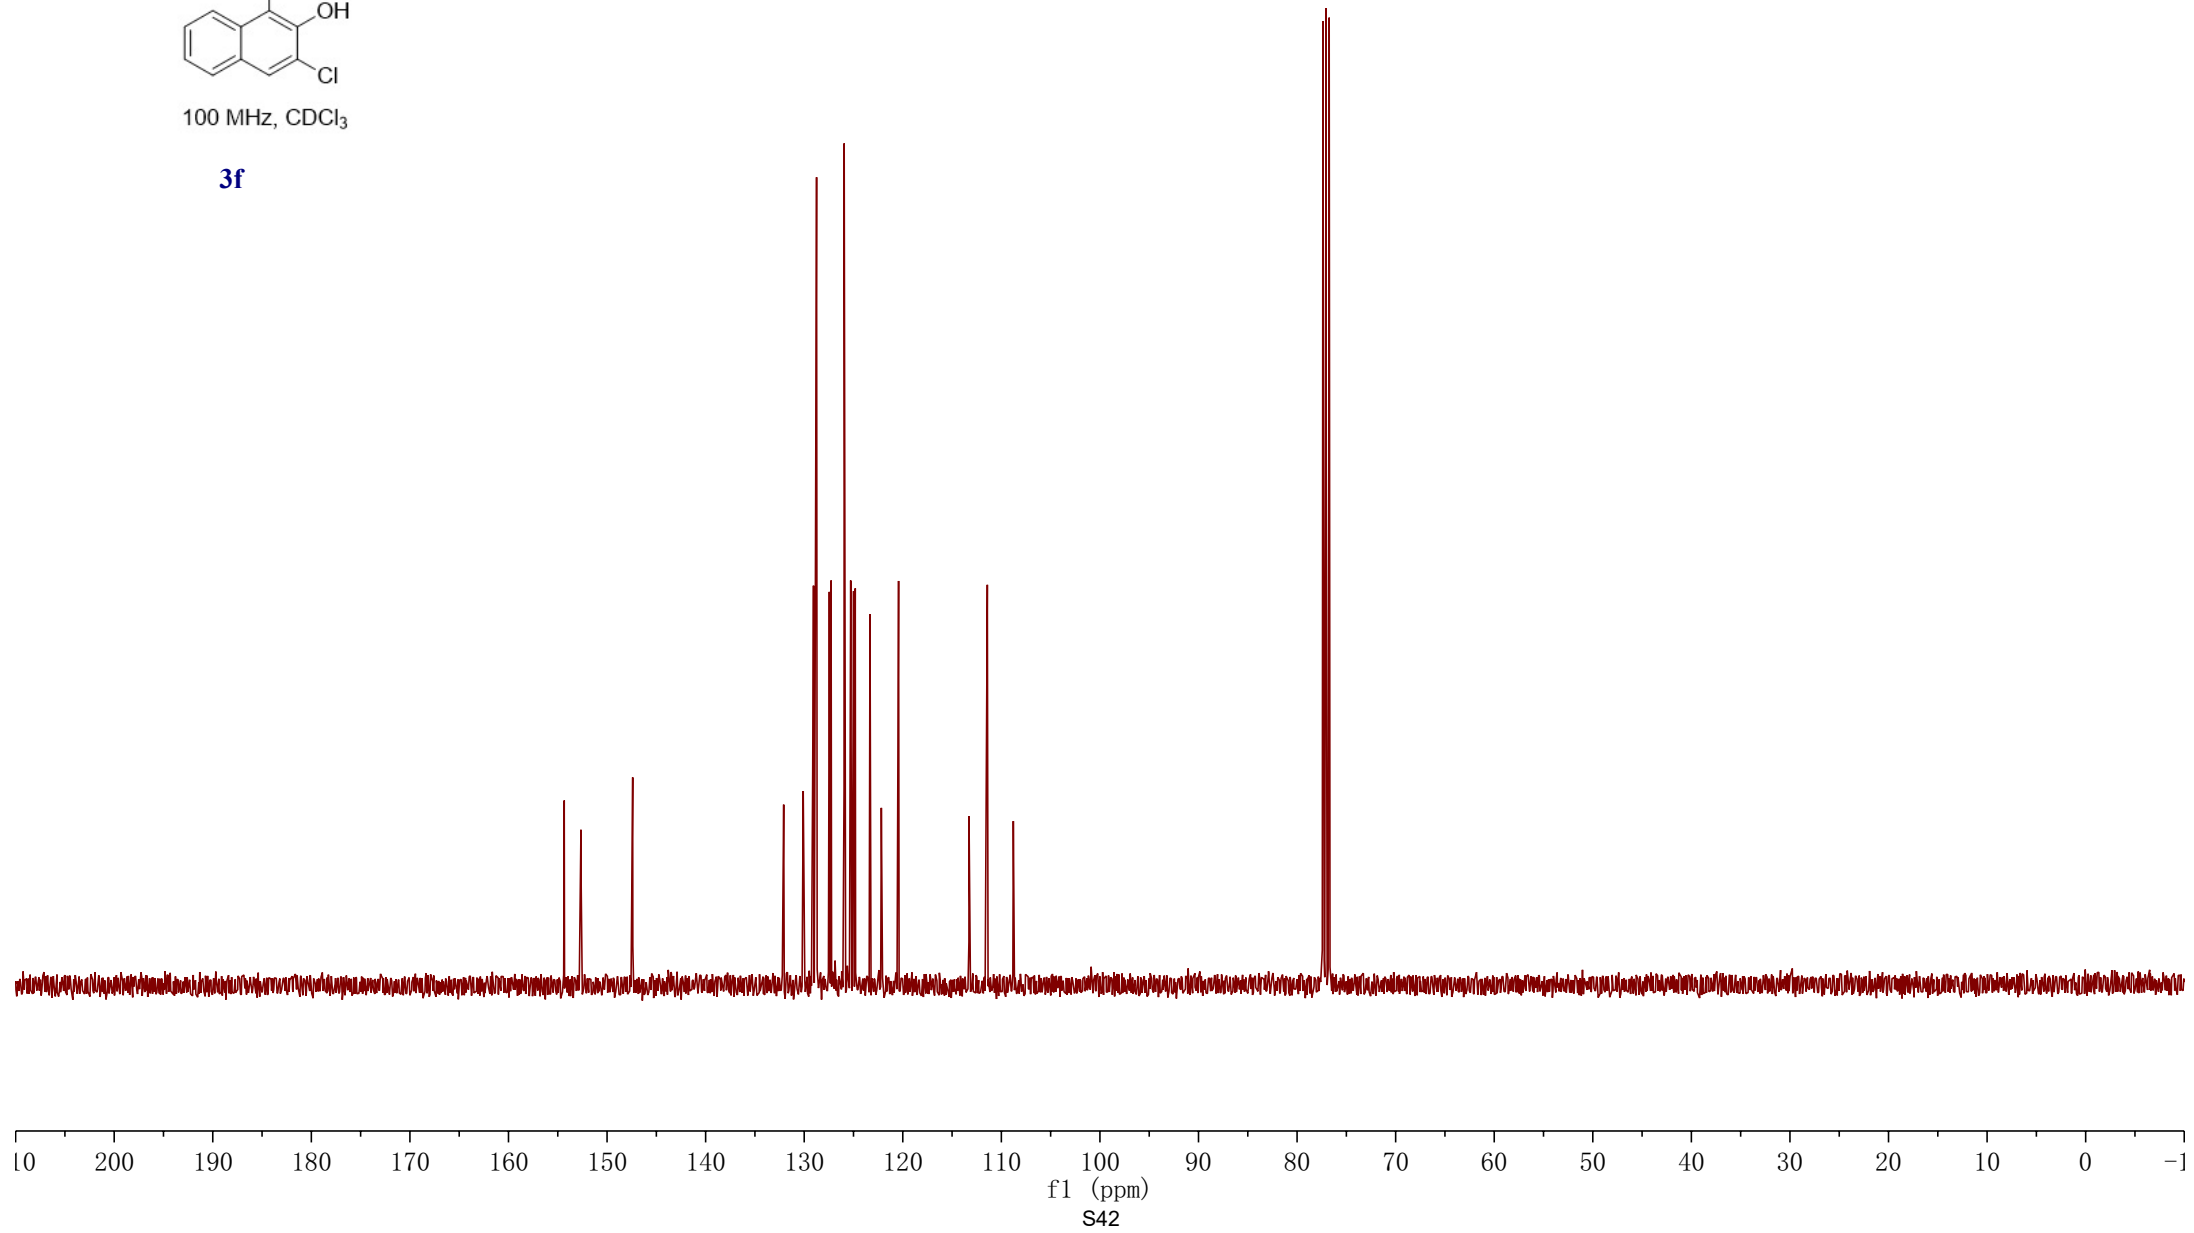

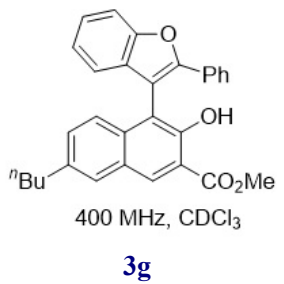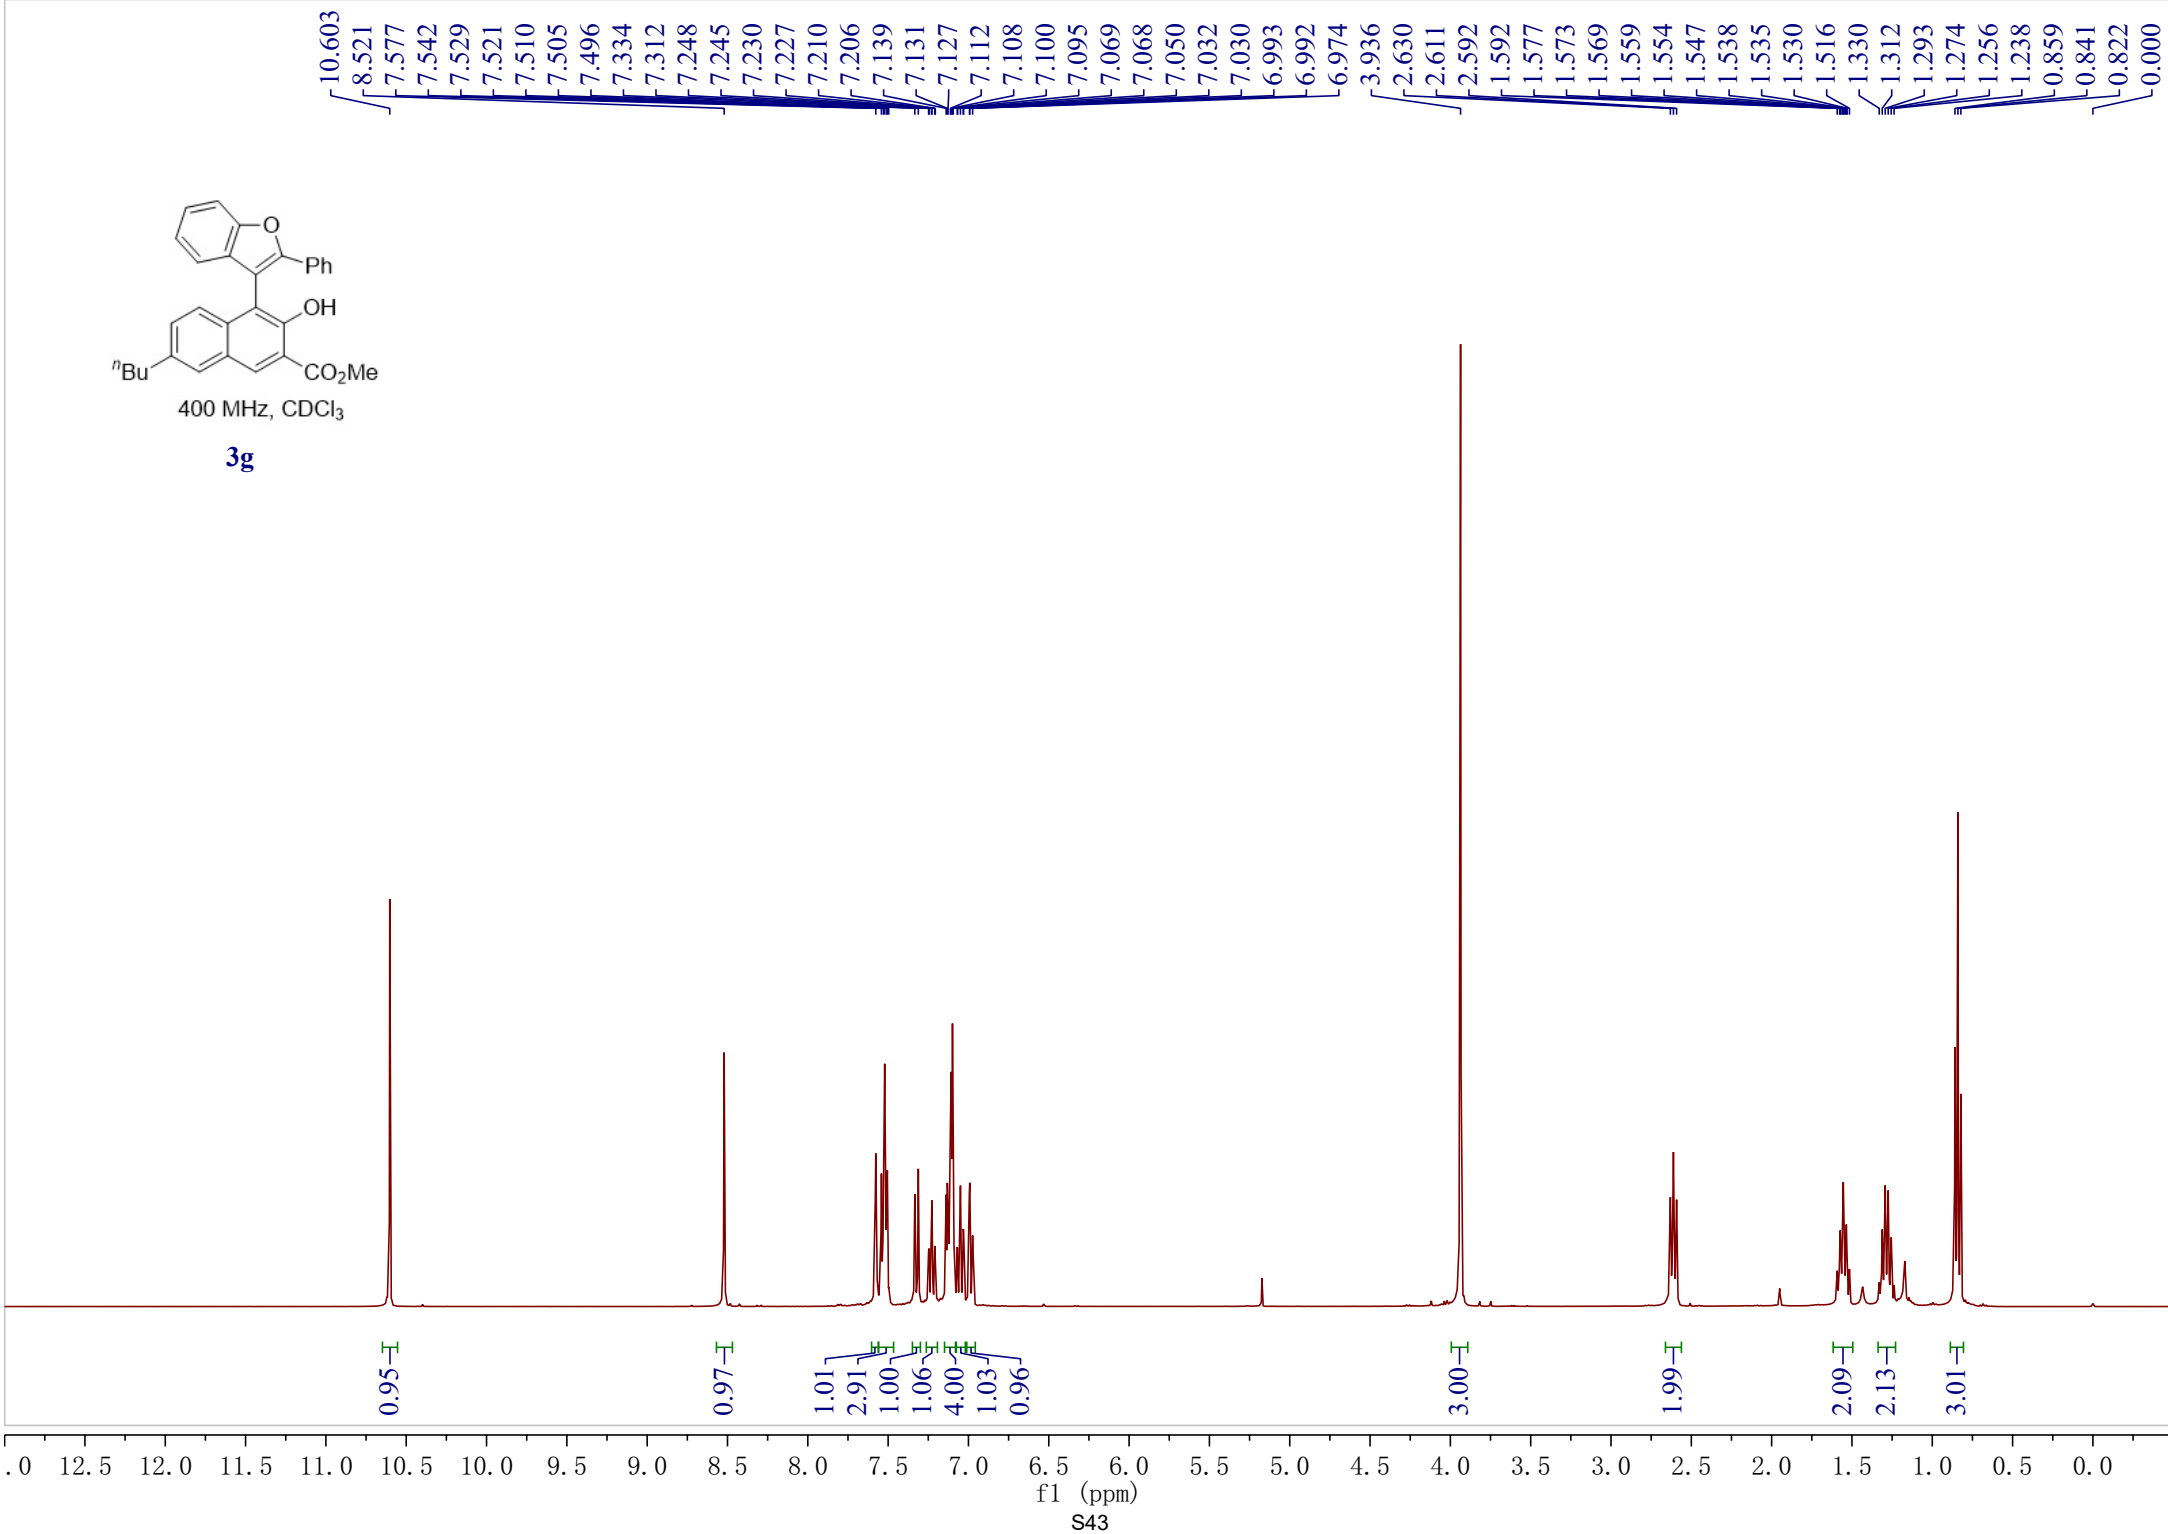

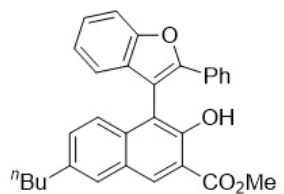

100 MHz, CDCl<sub>3</sub>

**3g**

— 170.521

154.188

153.969

151.885

138.665

135.328

132.515

131.576

131.004

130.880

128.464

128.146

127.912

127.388

125.908

124.807

124.626

122.809

120.424

114.085

113.861

111.231

110.474

— 52.750

~ 35.331

~ 33.211

— 22.405

— 13.993

10 200 190 180 170 160 150 140 130 120 110 100 90 80 70 60 50 40 30 20 10 0 -1

f1 (ppm)

S44

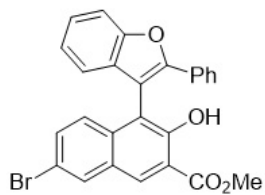

400 MHz, CDCl<sub>3</sub>

**3h**

—10.812

—8.556

—8.035

7.627

7.607

7.573

7.570

7.567

7.565

7.561

7.558

7.552

7.550

7.546

7.378

7.375

7.341

7.338

7.323

7.320

7.317

7.303

7.299

7.217

7.211

7.203

7.201

7.198

7.194

7.186

7.177

7.164

7.162

7.145

7.143

7.127

7.125

7.056

7.037

4.026

4.018

4.018

0.000

0.94

0.95

1.00

1.05

1.93

1.84

1.08

3.10

0.99

0.93

3.00

.0 12.5 12.0 11.5 11.0 10.5 10.0 9.5 9.0 8.5 8.0 7.5 7.0 6.5 6.0 5.5 5.0 4.5 4.0 3.5 3.0 2.5 2.0 1.5 1.0 0.5 0.0 -0

f1 (ppm)

S45

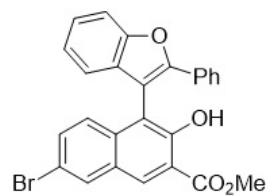

100 MHz, CDCl<sub>3</sub>

**3h**

—170.136

154.945

154.233

152.142

135.215

132.922

132.008

131.510

130.777

130.623

128.594

128.428

128.238

126.812

125.938

124.855

123.009

120.254

117.977

115.189

114.653

111.384

109.756

—53.022

210 200 190 180 170 160 150 140 130 120 110 100 90 80 70 60 50 40 30 20 10 0 -10

f1 (ppm)

S46



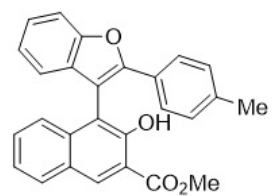

400 MHz, CDCl<sub>3</sub>

**3i**

—10.747

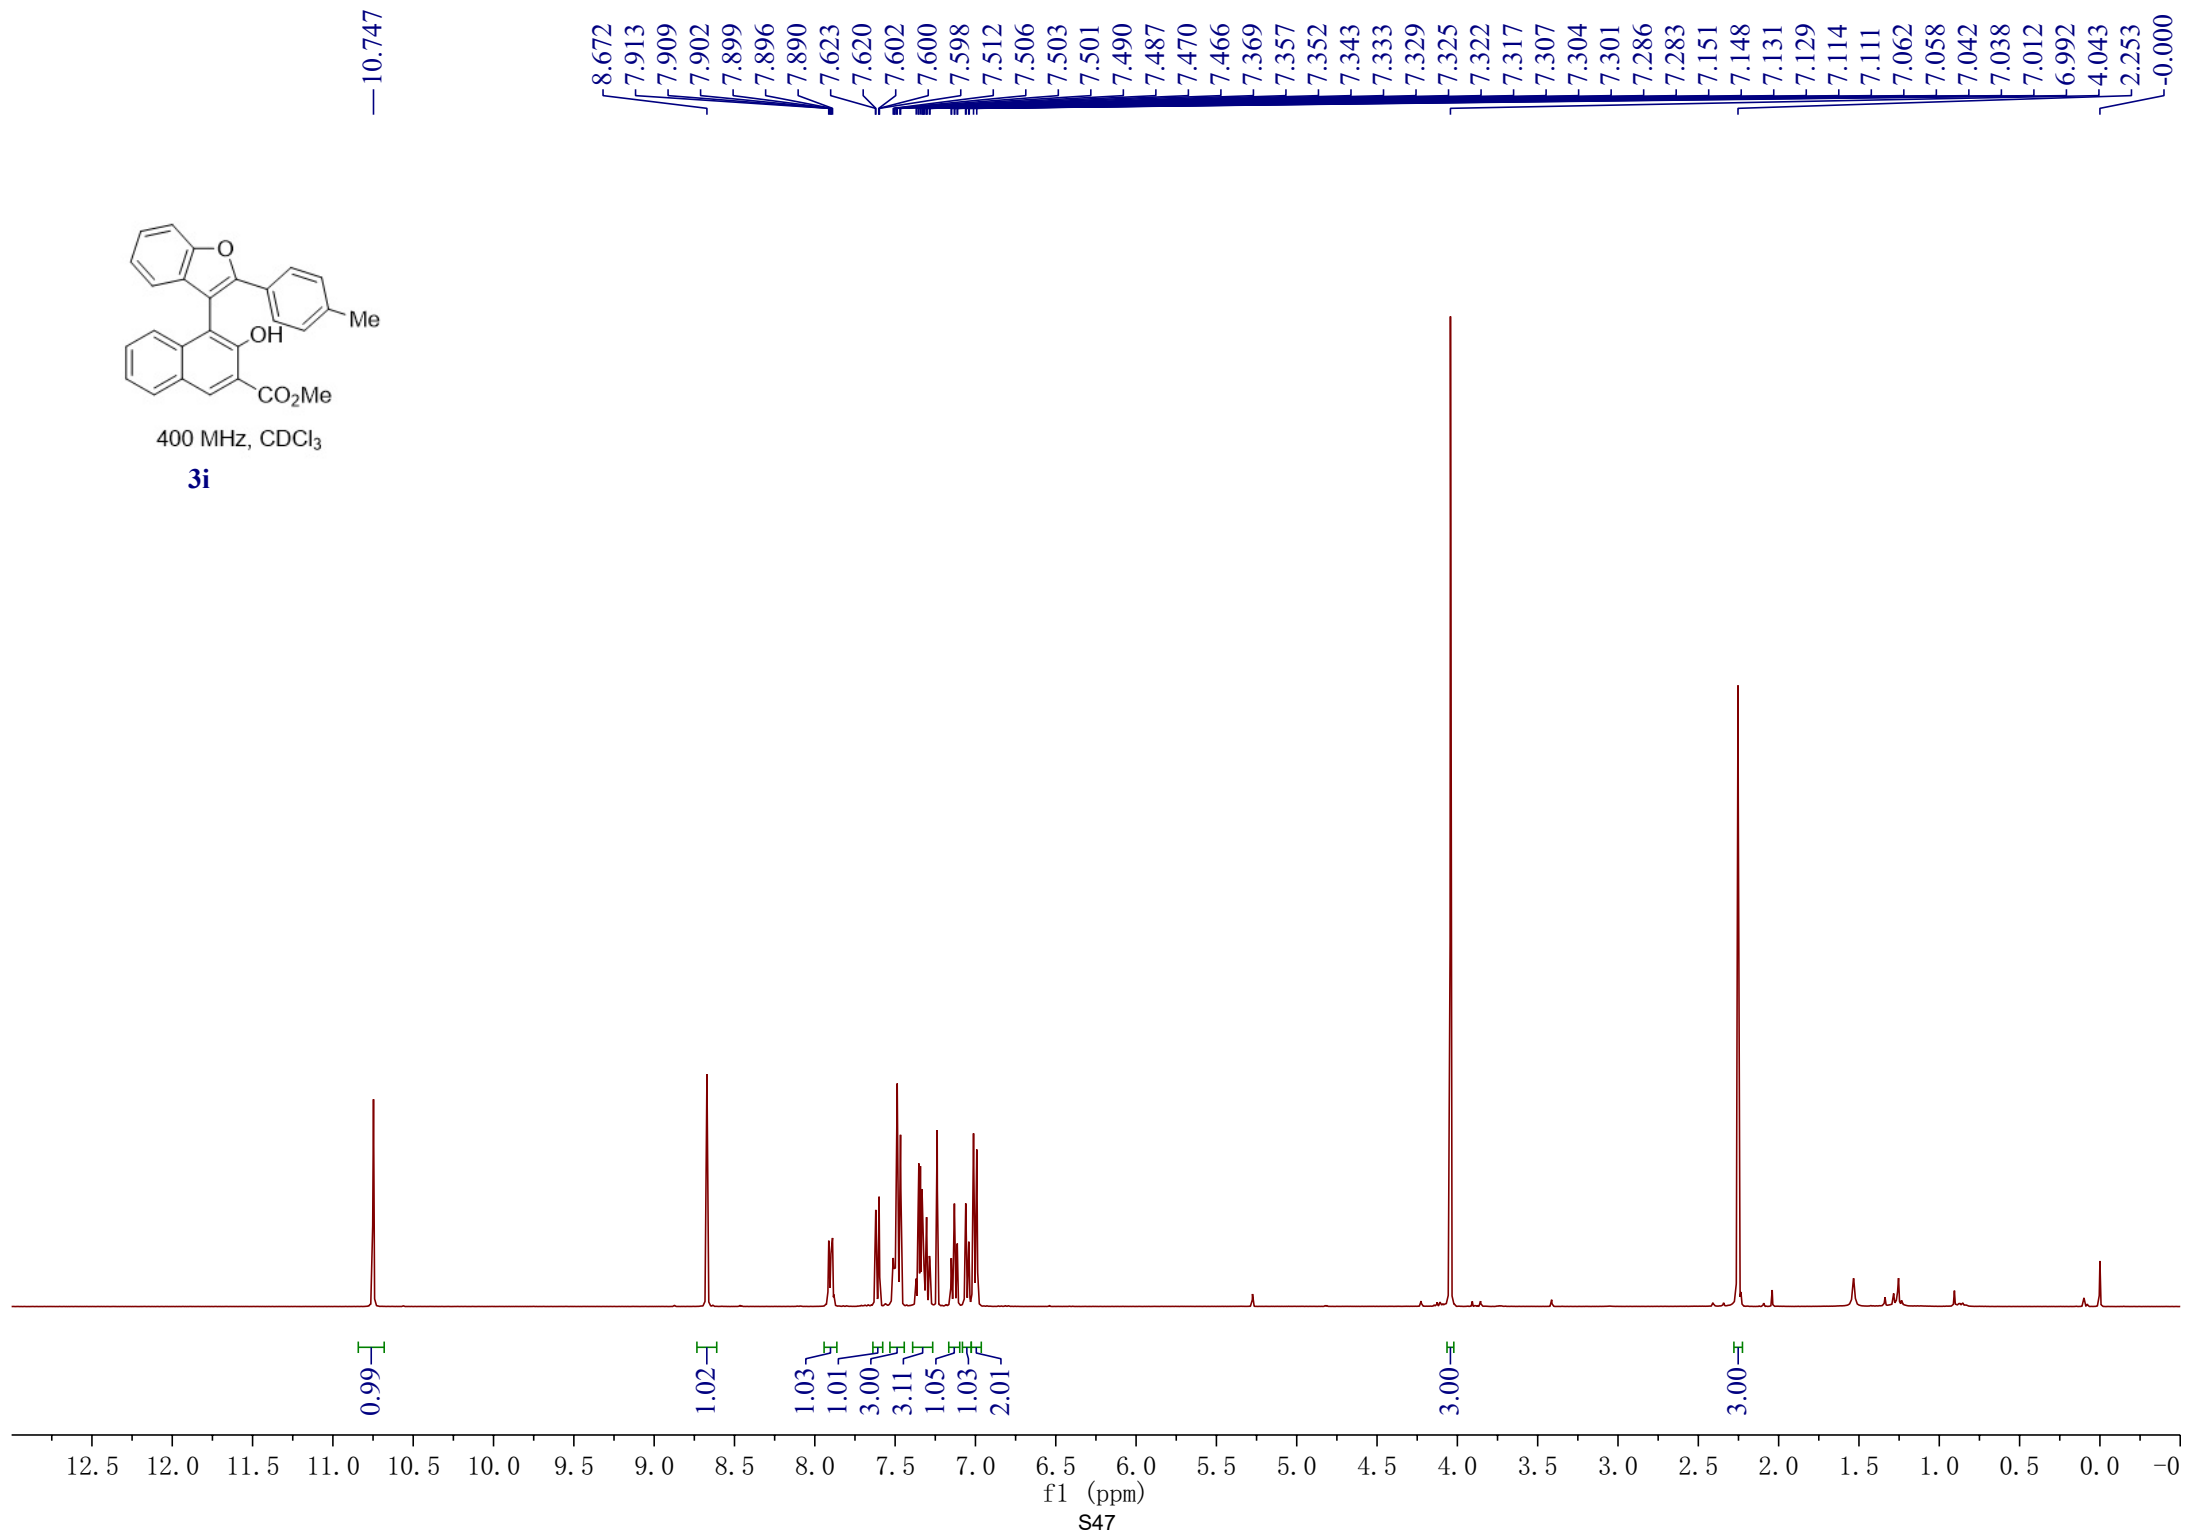

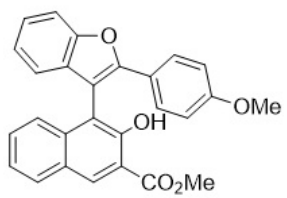

100 MHz, CDCl<sub>3</sub>

**3i**

—170.438

154.539  
154.116  
152.234  
138.190  
136.867  
133.053  
130.898  
129.779  
129.732  
129.223  
128.187  
127.186  
125.839  
124.984  
124.422  
124.182  
122.770  
120.224  
114.224  
111.191  
109.500

—52.815

—21.325

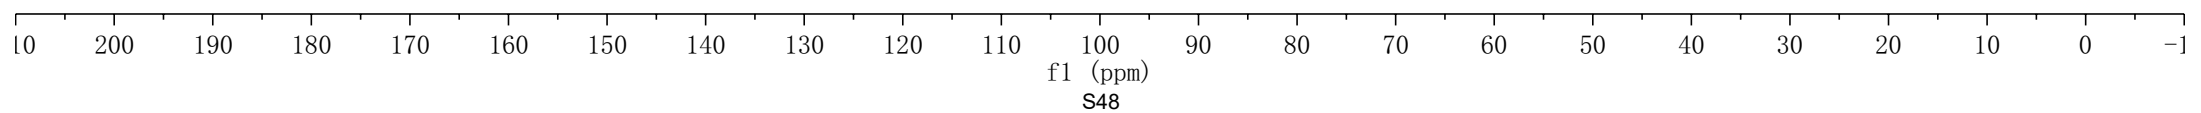

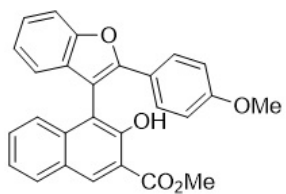

400 MHz, CDCl<sub>3</sub>

**3j**

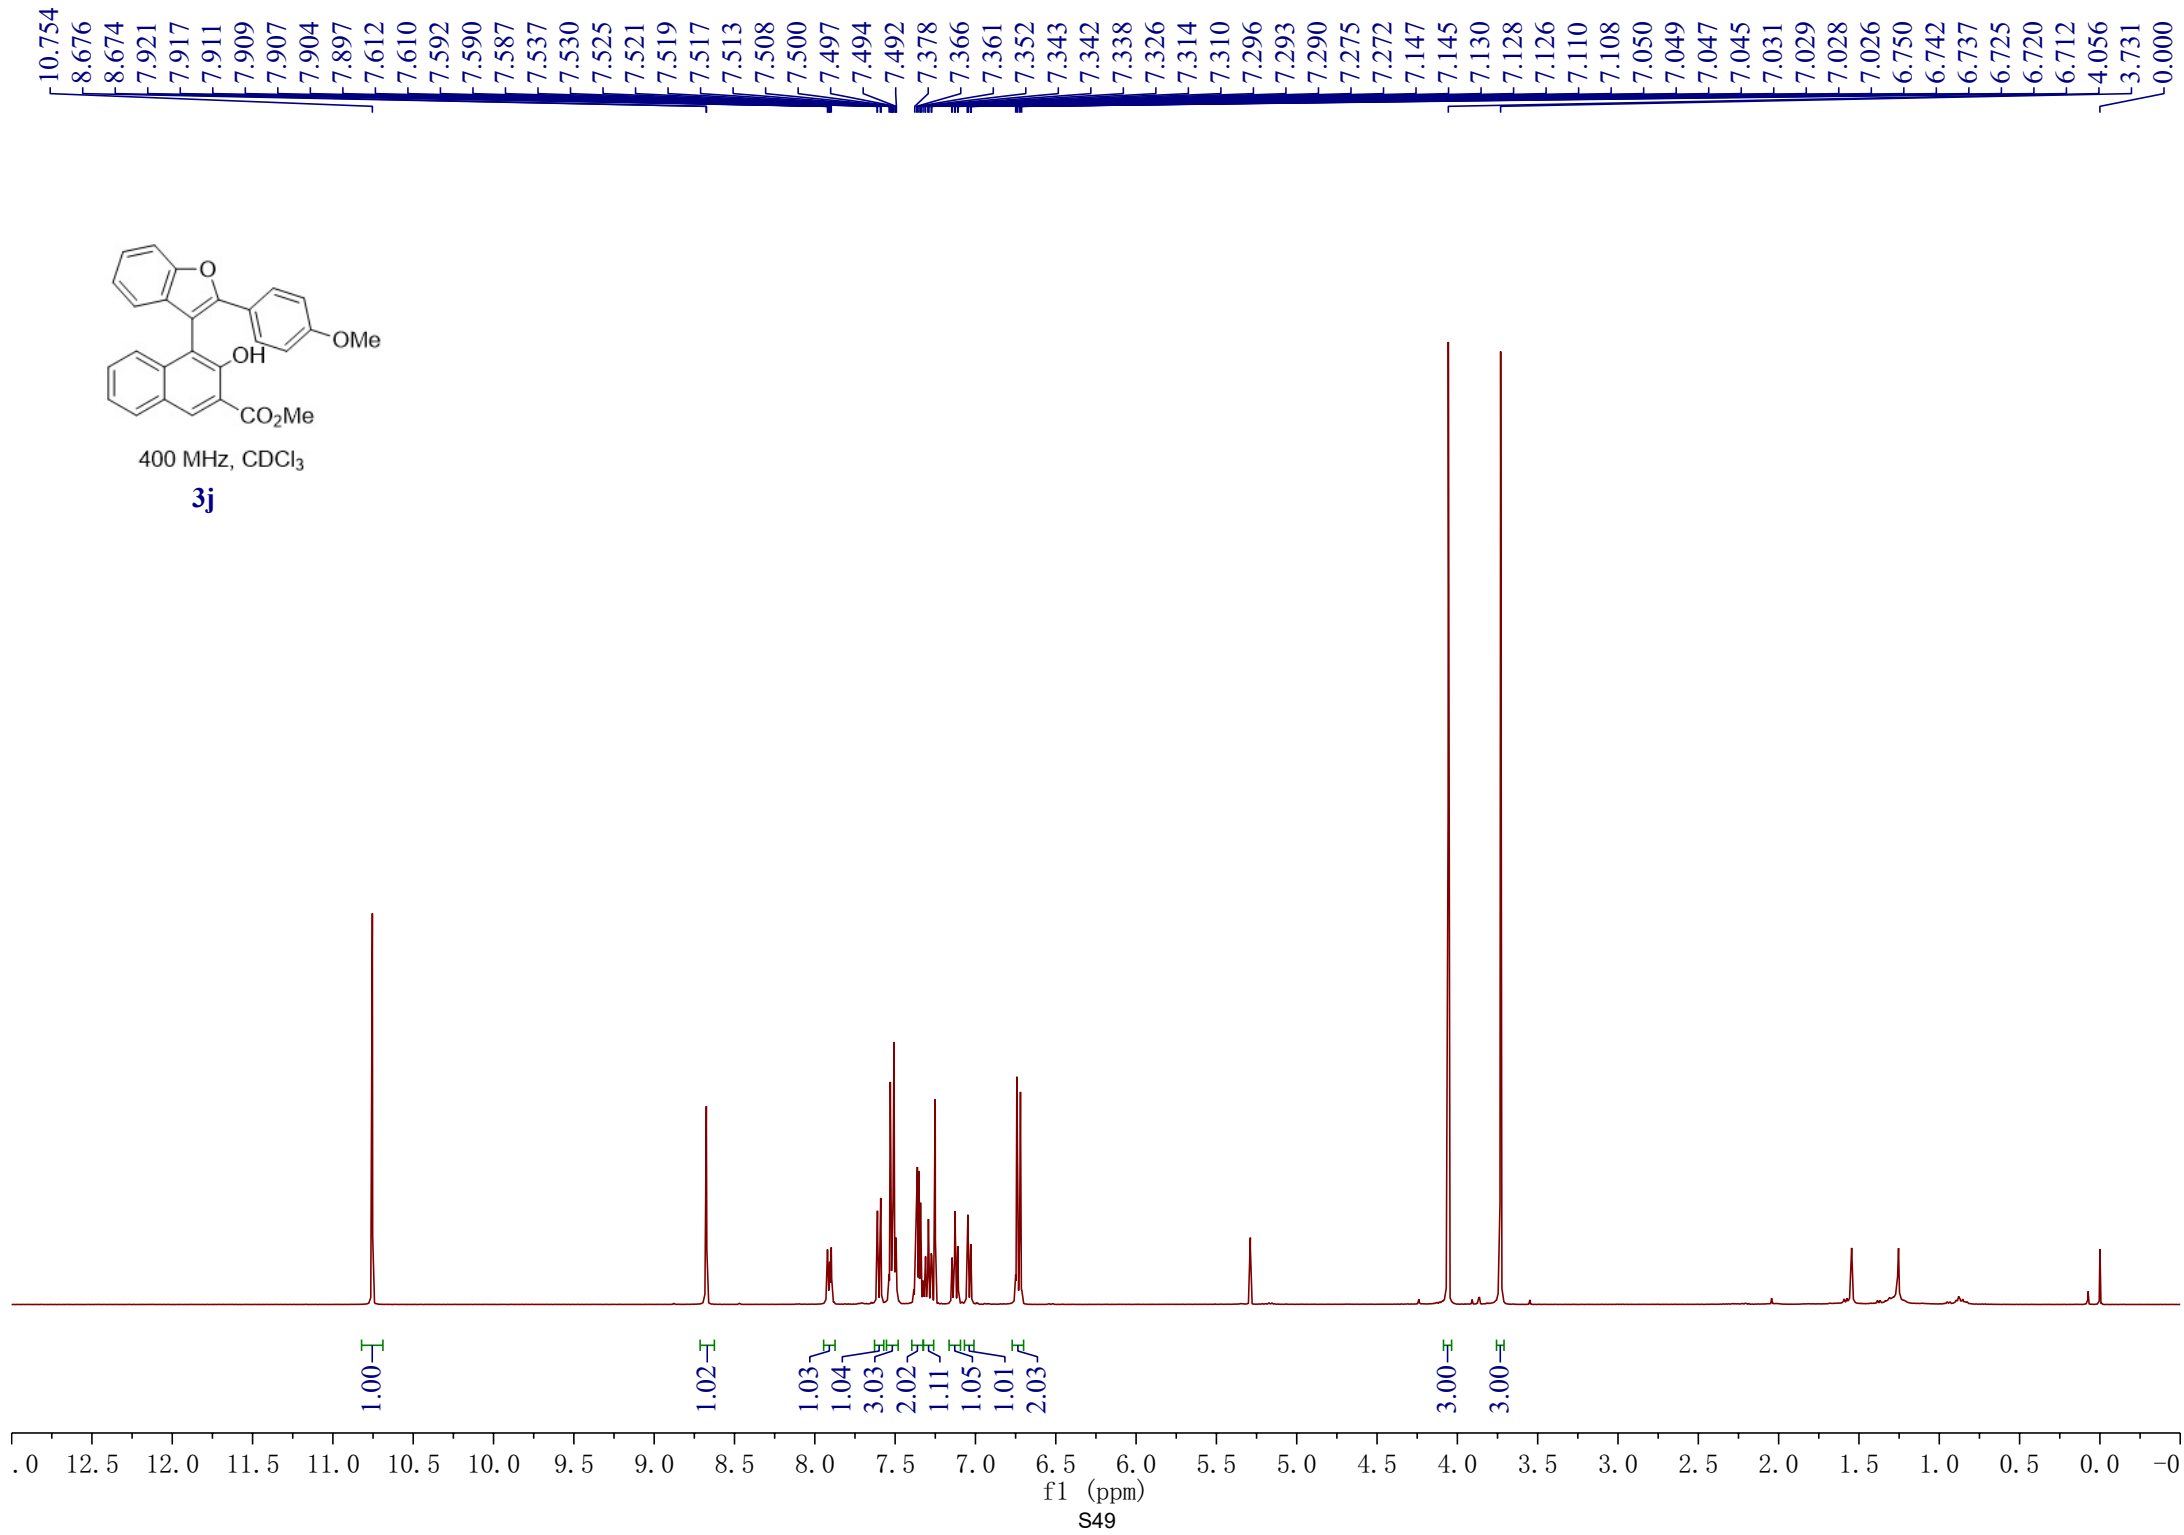

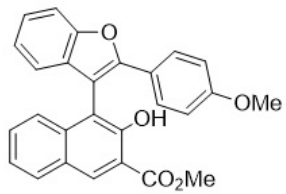

100 MHz, CDCl<sub>3</sub>

**3j**

170.564  
159.674  
154.697  
154.154  
152.217  
137.011  
133.136  
131.090  
129.897  
129.843  
127.514  
127.308  
125.124  
124.301  
124.286  
123.863  
122.850  
120.187  
114.388  
114.338  
114.085  
111.201  
108.658

55.308  
52.941

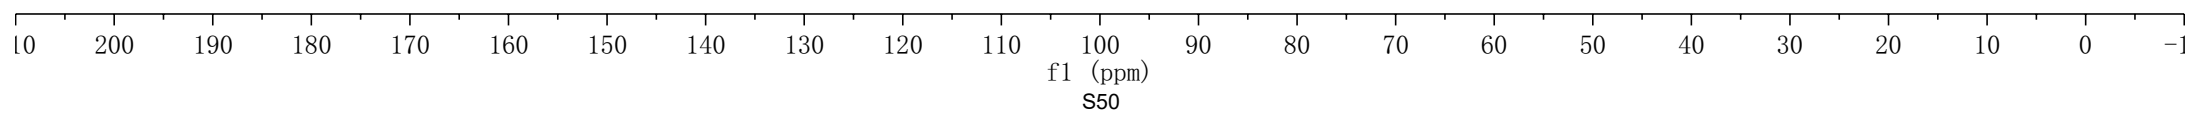

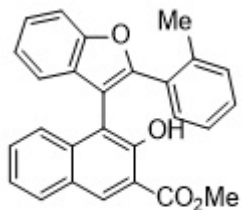

400 MHz, CDCl<sub>3</sub>

3k

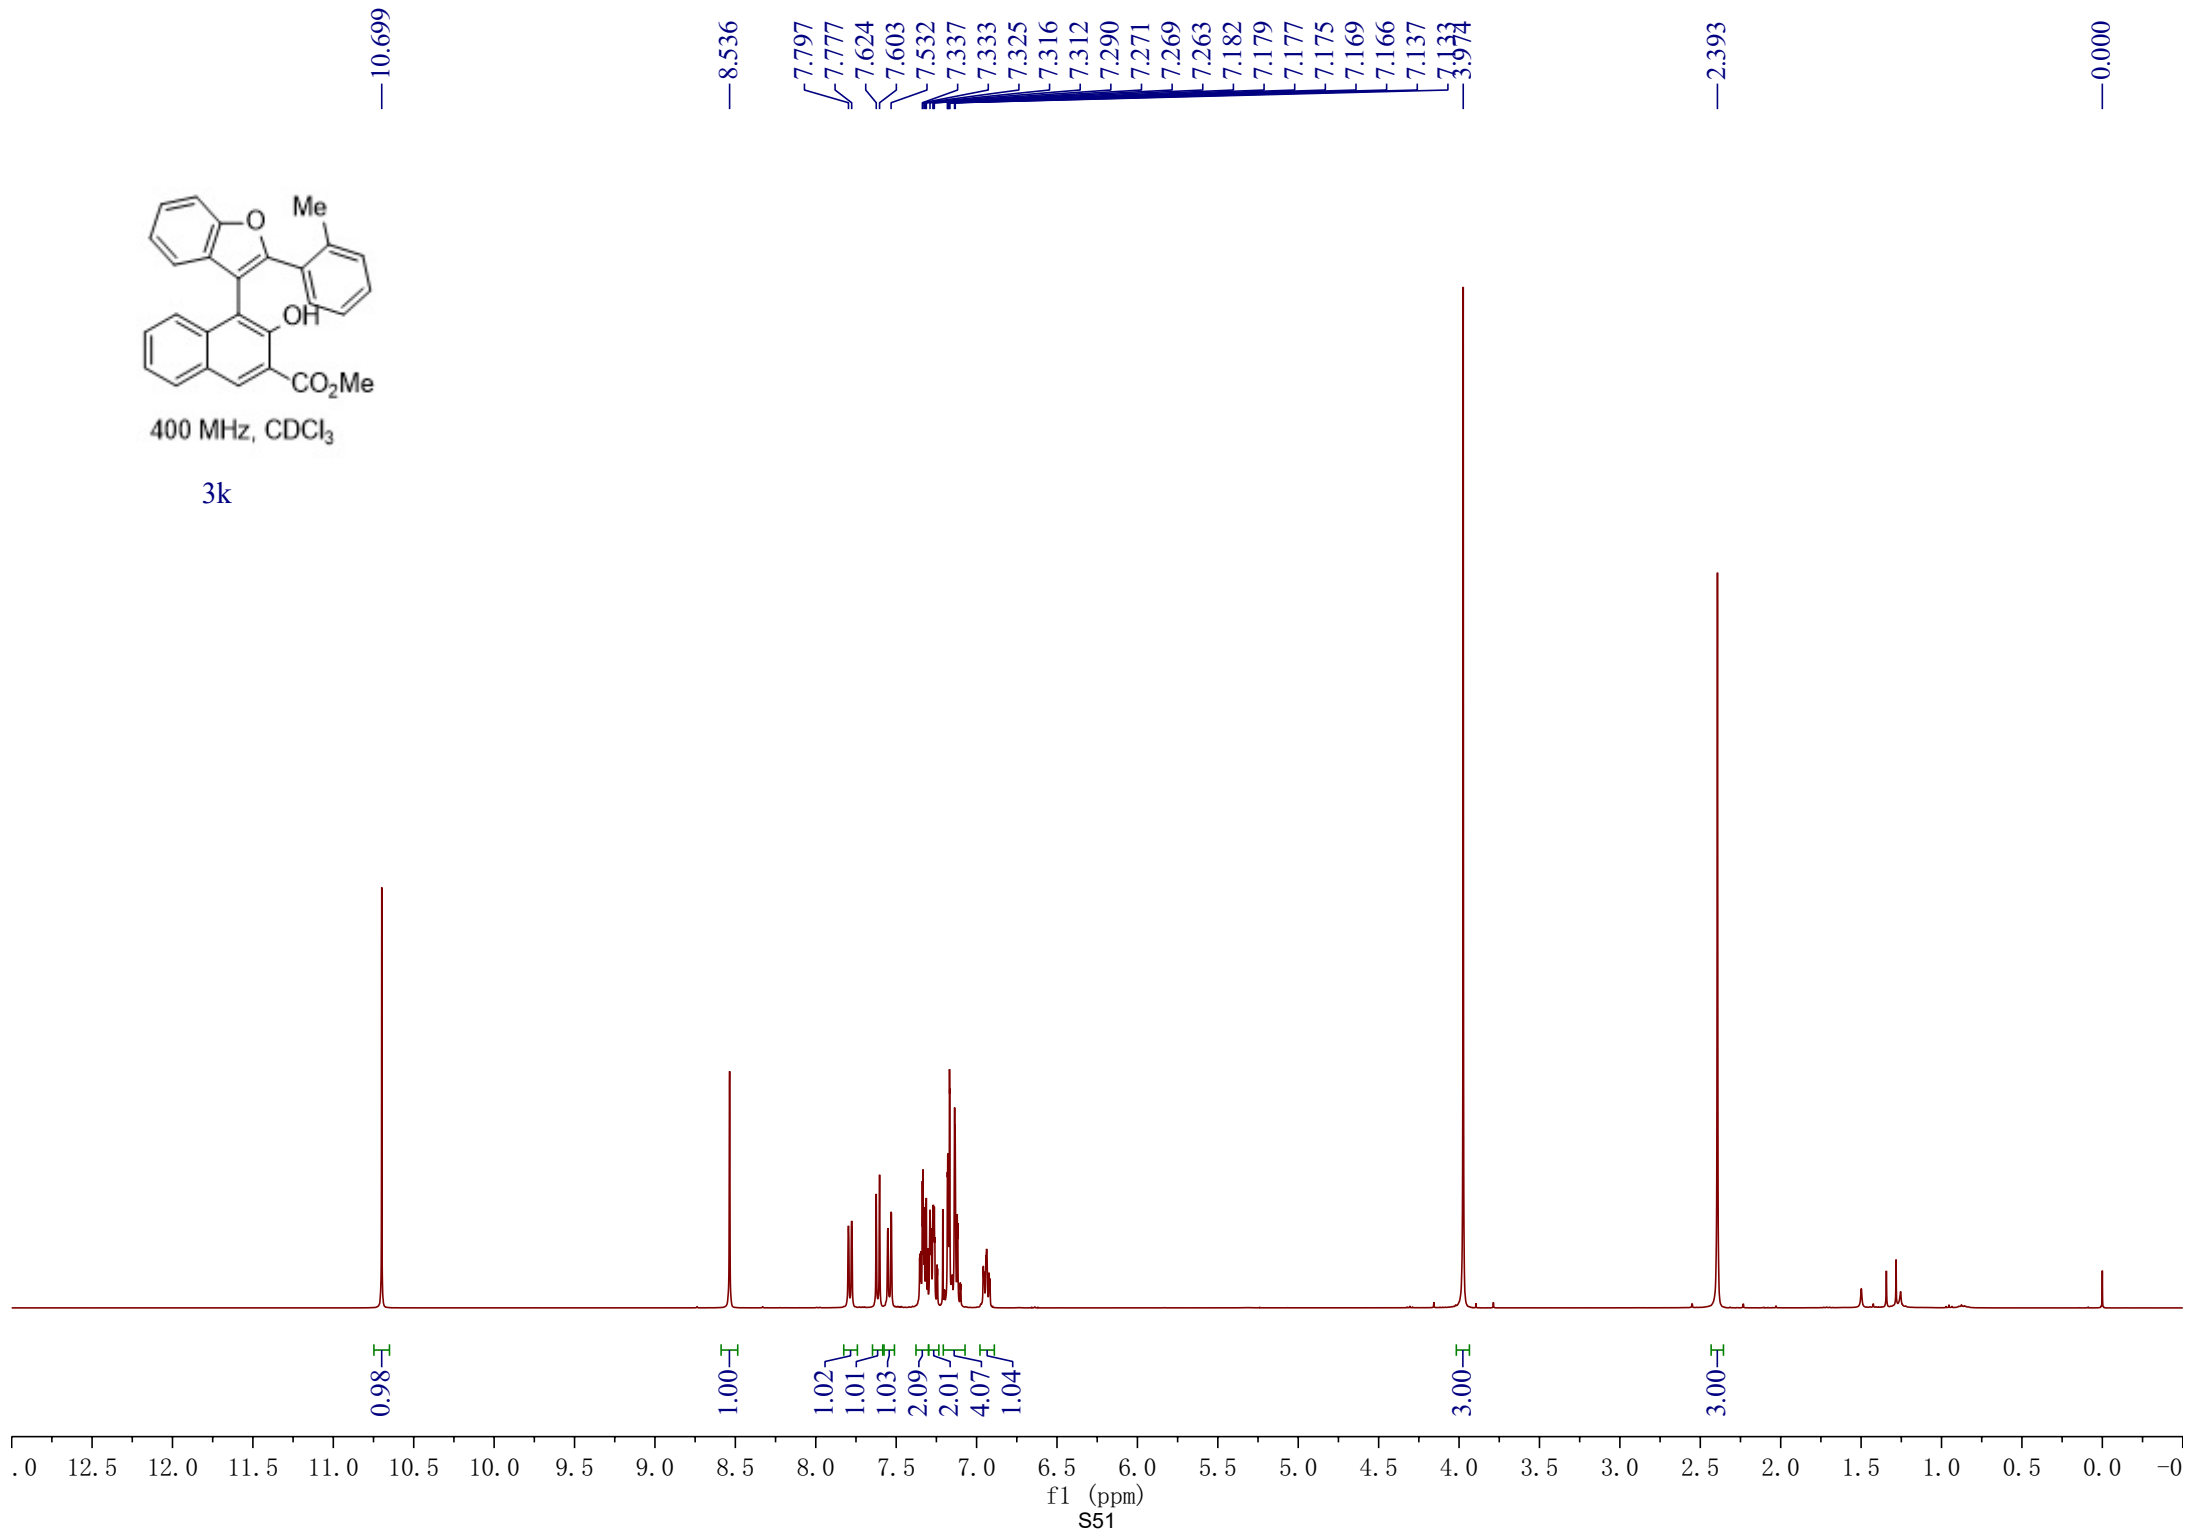

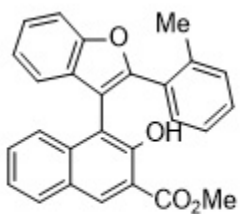

100 MHz, CDCl<sub>3</sub>

**3k**

—170.510

154.731

154.718

154.704

137.817

137.059

132.870

130.549

130.505

130.086

130.061

129.743

129.383

128.920

126.987

125.399

124.877

124.285

123.937

122.740

120.626

114.010

113.909

111.742

111.396

—52.748

—20.570

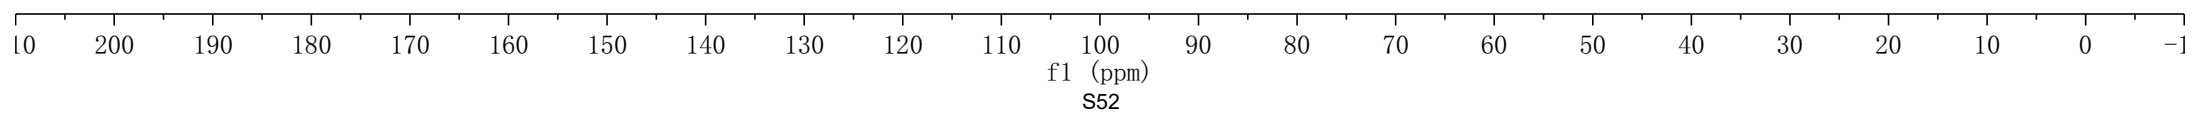

10.757  
8.672  
7.909  
7.905  
7.899  
7.898  
7.894  
7.891  
7.885  
7.634  
7.631  
7.629  
7.613  
7.611  
7.609  
7.562  
7.562  
7.560  
7.507  
7.503  
7.500  
7.498  
7.492  
7.488  
7.485  
7.483  
7.481  
7.367  
7.355  
7.350  
7.340  
7.336  
7.333  
7.330  
7.325  
7.318  
7.315  
7.312  
7.298  
7.294  
7.242  
7.238  
7.230  
7.226  
7.221  
7.158  
7.156  
7.140  
7.138  
7.136  
7.121  
7.118  
7.078  
7.076  
7.074  
7.073  
7.058  
7.057  
7.055  
7.053  
7.035  
7.018  
7.016  
7.010  
7.007  
7.002  
7.000  
4.037  
2.231  
0.000

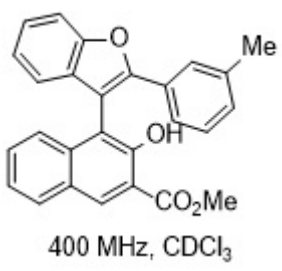

31

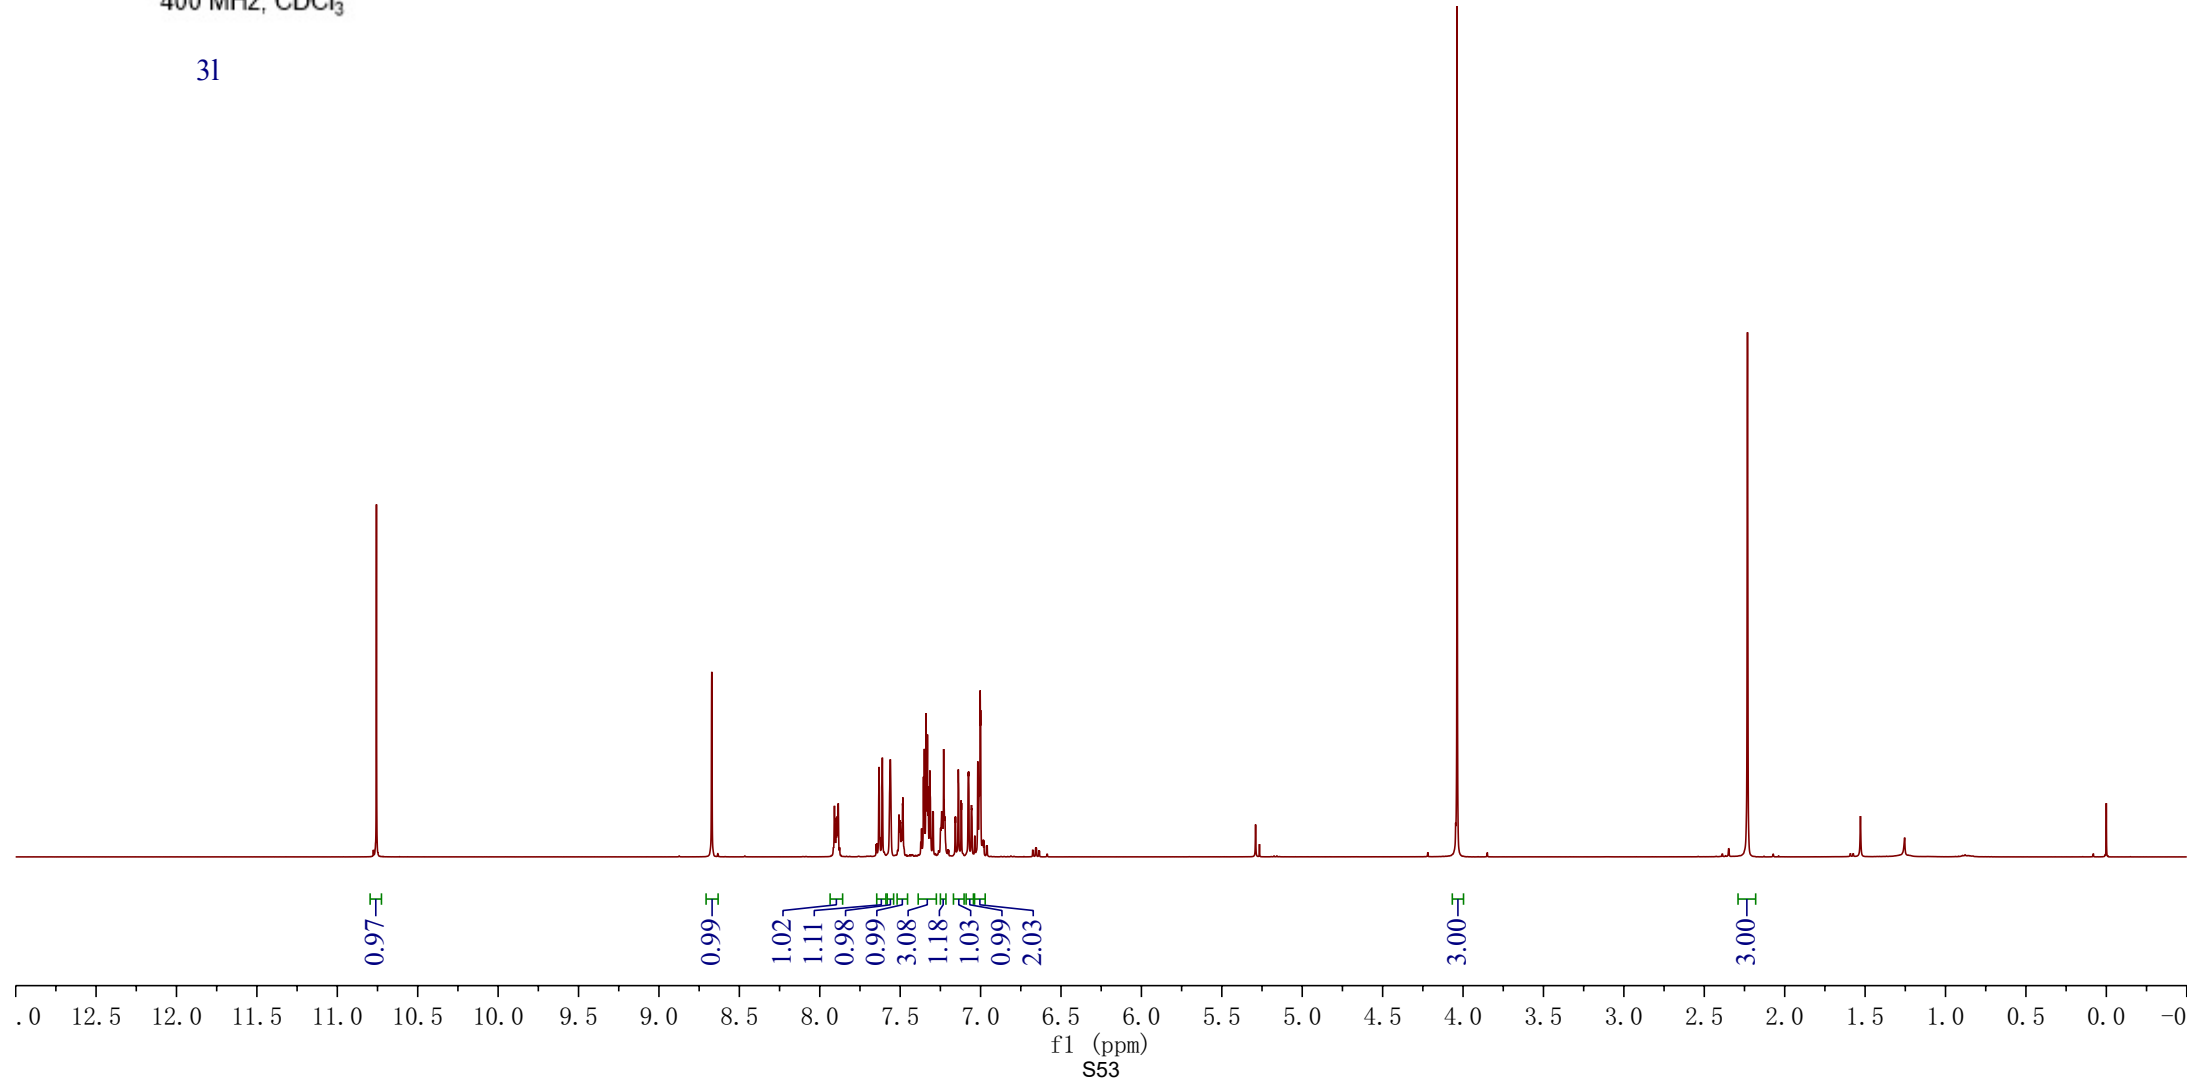

f1 (ppm)  
S53

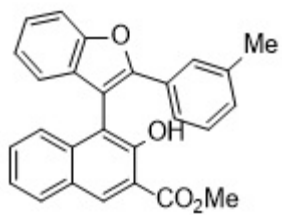

100 MHz, CDCl<sub>3</sub>

31

— 170.446  
— 154.537  
— 154.193  
— 152.153  
— 138.309  
— 138.031  
— 136.858  
— 133.102  
— 130.855  
— 130.838  
— 129.794  
— 129.764  
— 129.077  
— 128.367  
— 127.183  
— 126.572  
— 124.977  
— 124.608  
— 124.200  
— 123.132  
— 122.825  
— 120.369  
— 114.202  
— 111.247  
— 110.193

— 52.833

— 21.545

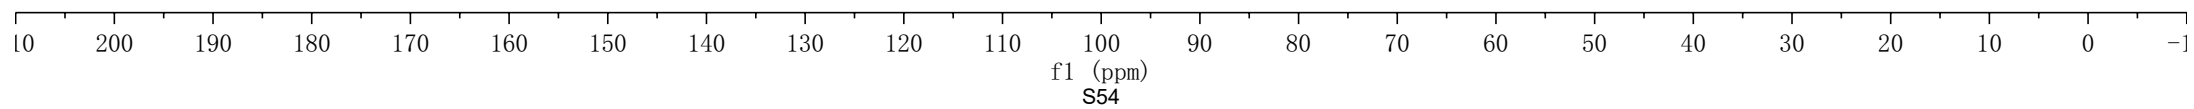



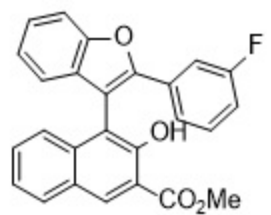

400 MHz, CDCl<sub>3</sub>

3m

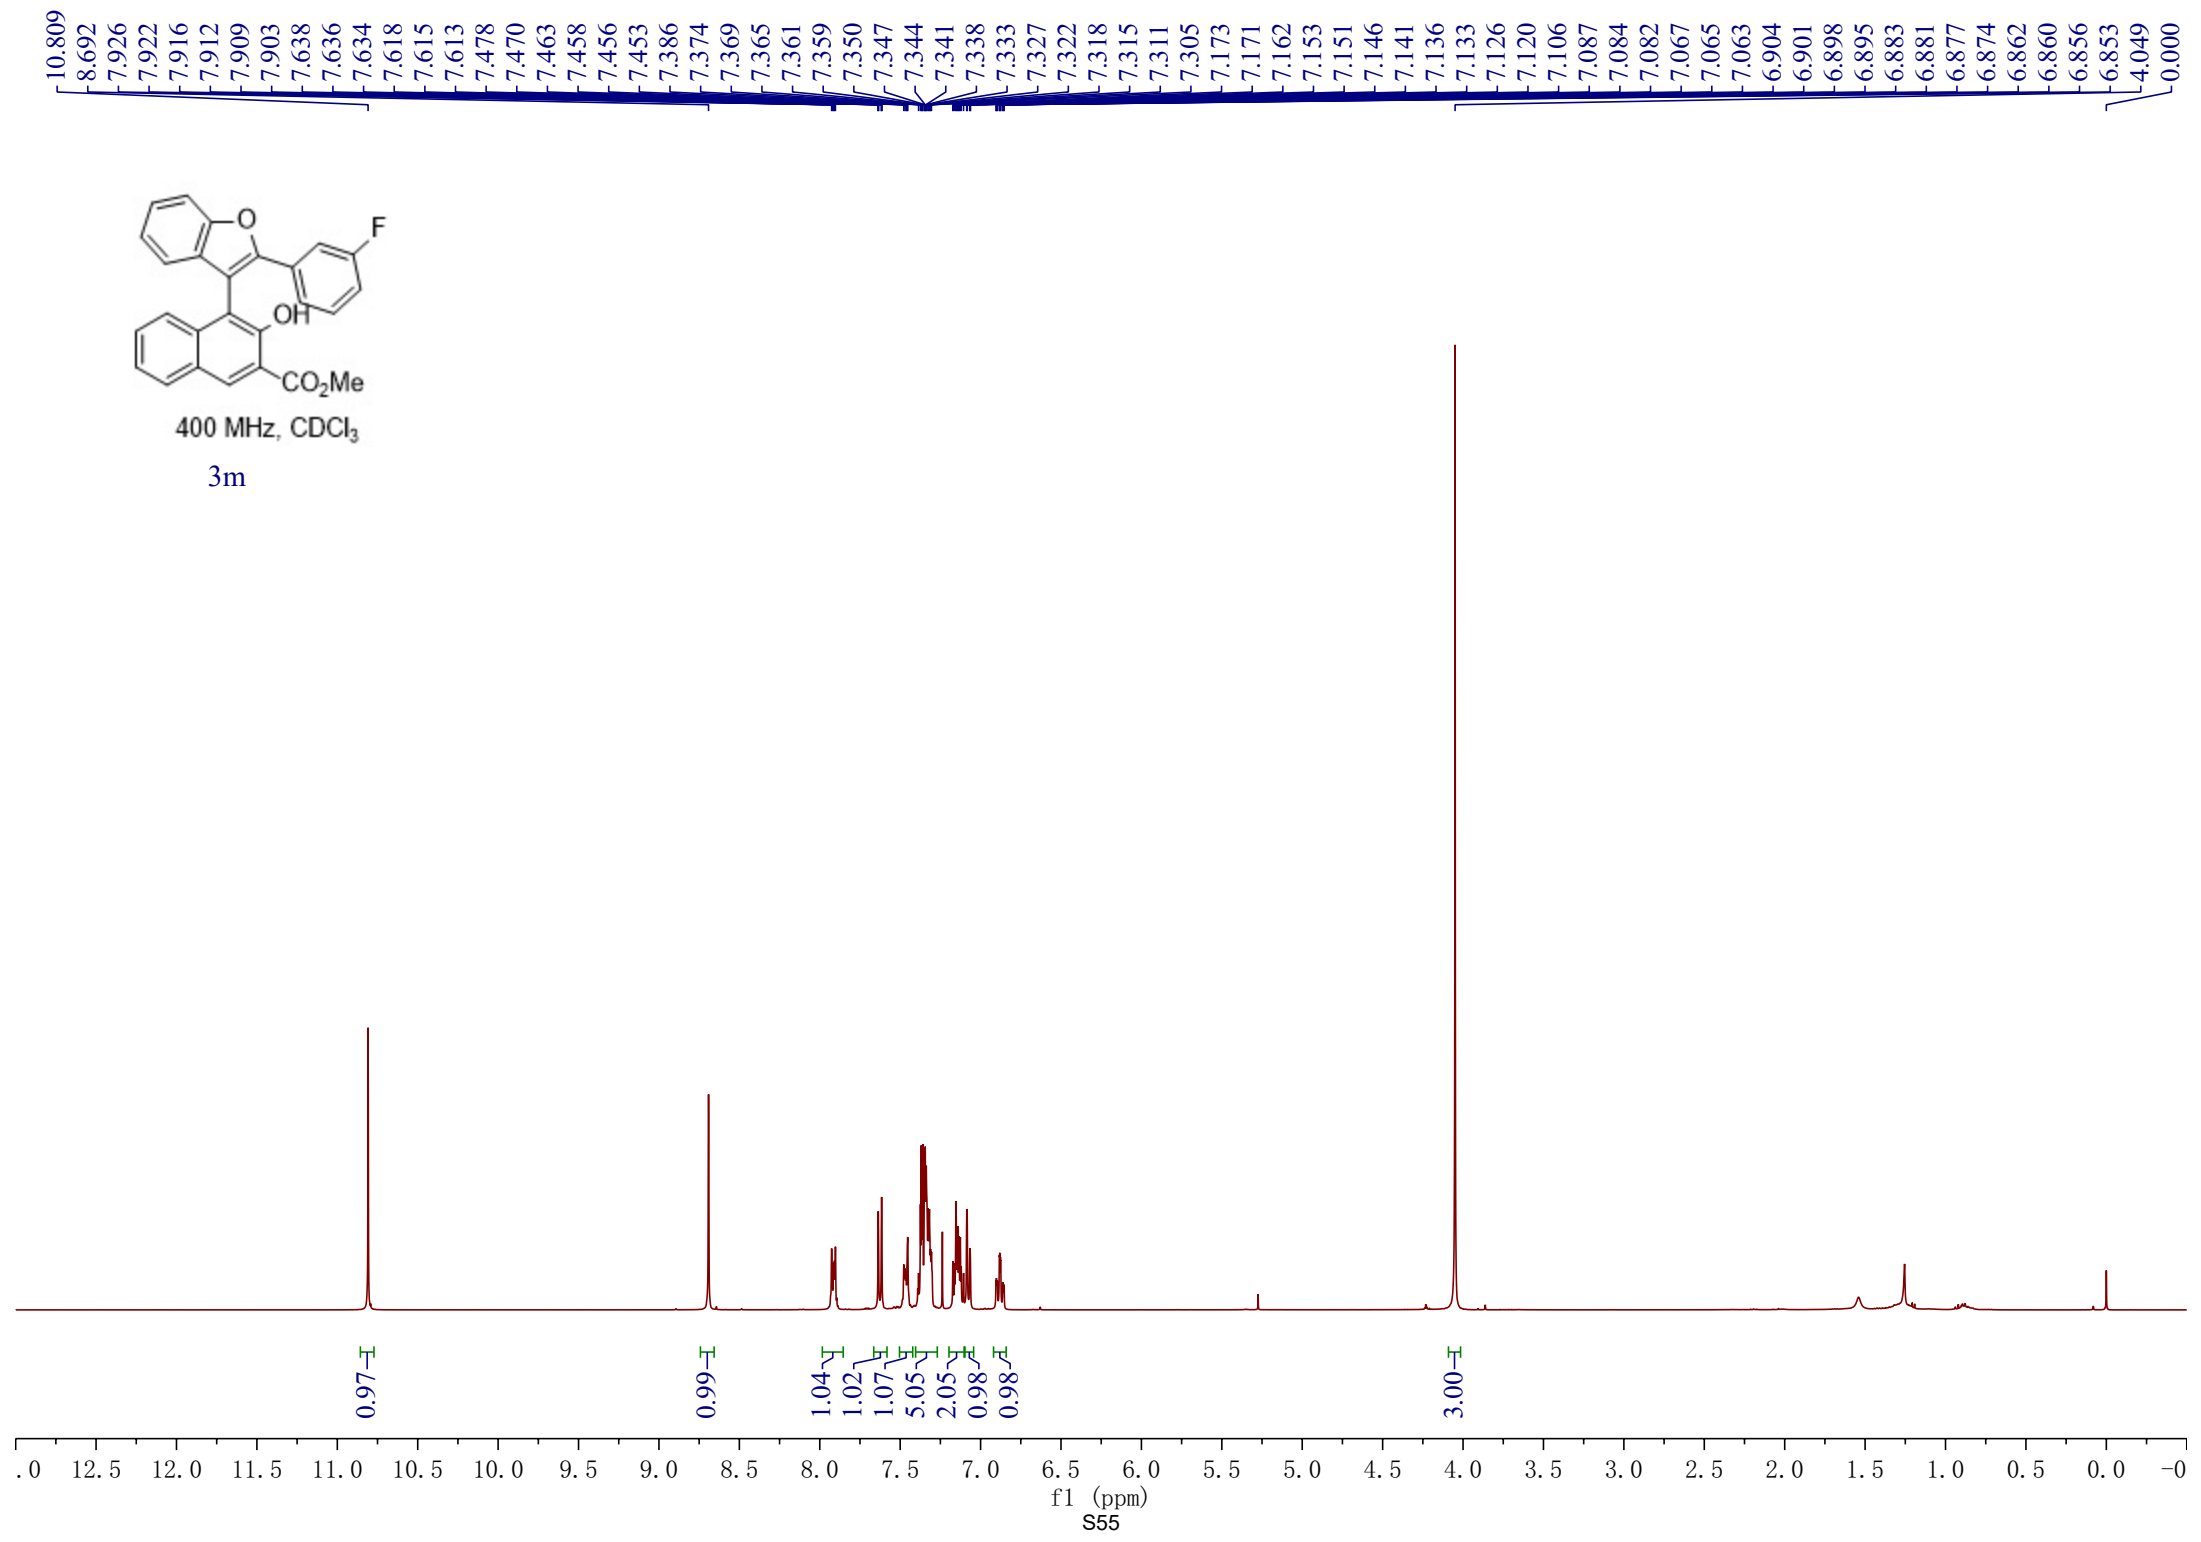

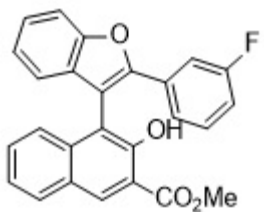

100 MHz, CDCl<sub>3</sub>

3m

170.507  
164.101  
161.668  
154.608  
154.319  
150.740  
150.708  
136.747  
133.509  
133.118  
133.033  
130.702  
130.180  
130.097  
130.012  
127.314  
125.240  
124.805  
124.421  
123.136  
121.673  
121.644  
120.711  
115.255  
115.043  
114.346  
113.606  
112.942  
112.705  
111.509  
111.465

52.972

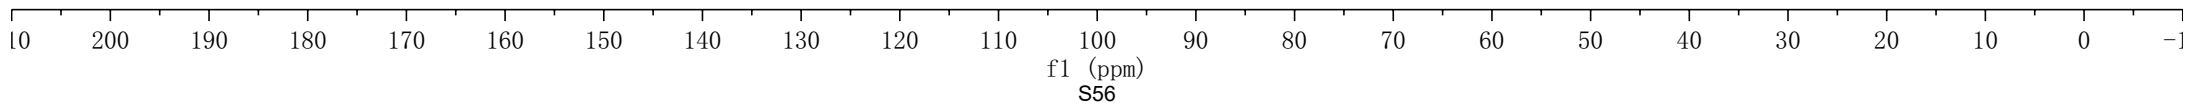

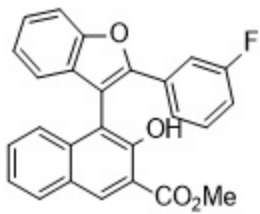

100 MHz, CDCl<sub>3</sub>

3m

—112.767

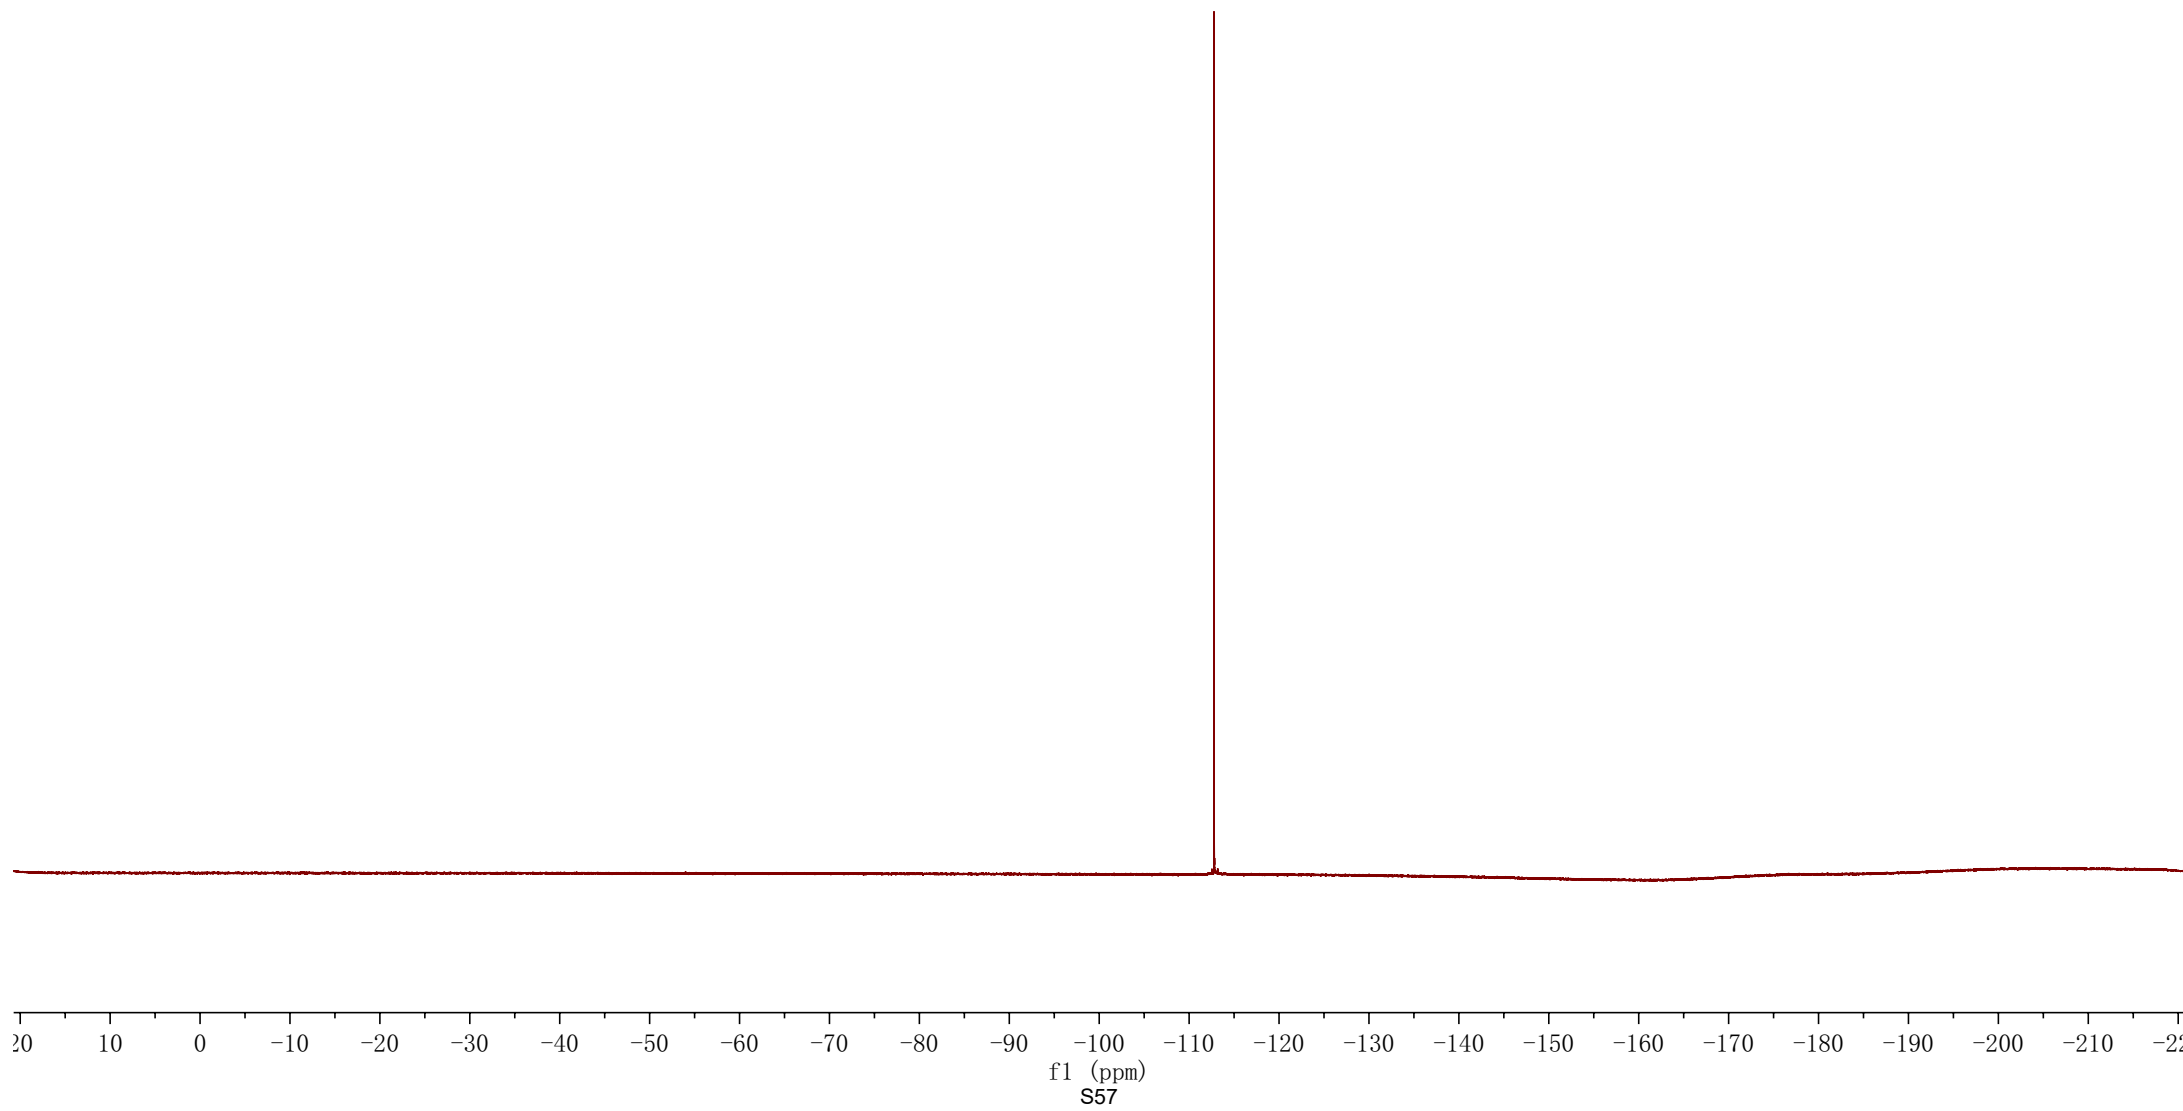

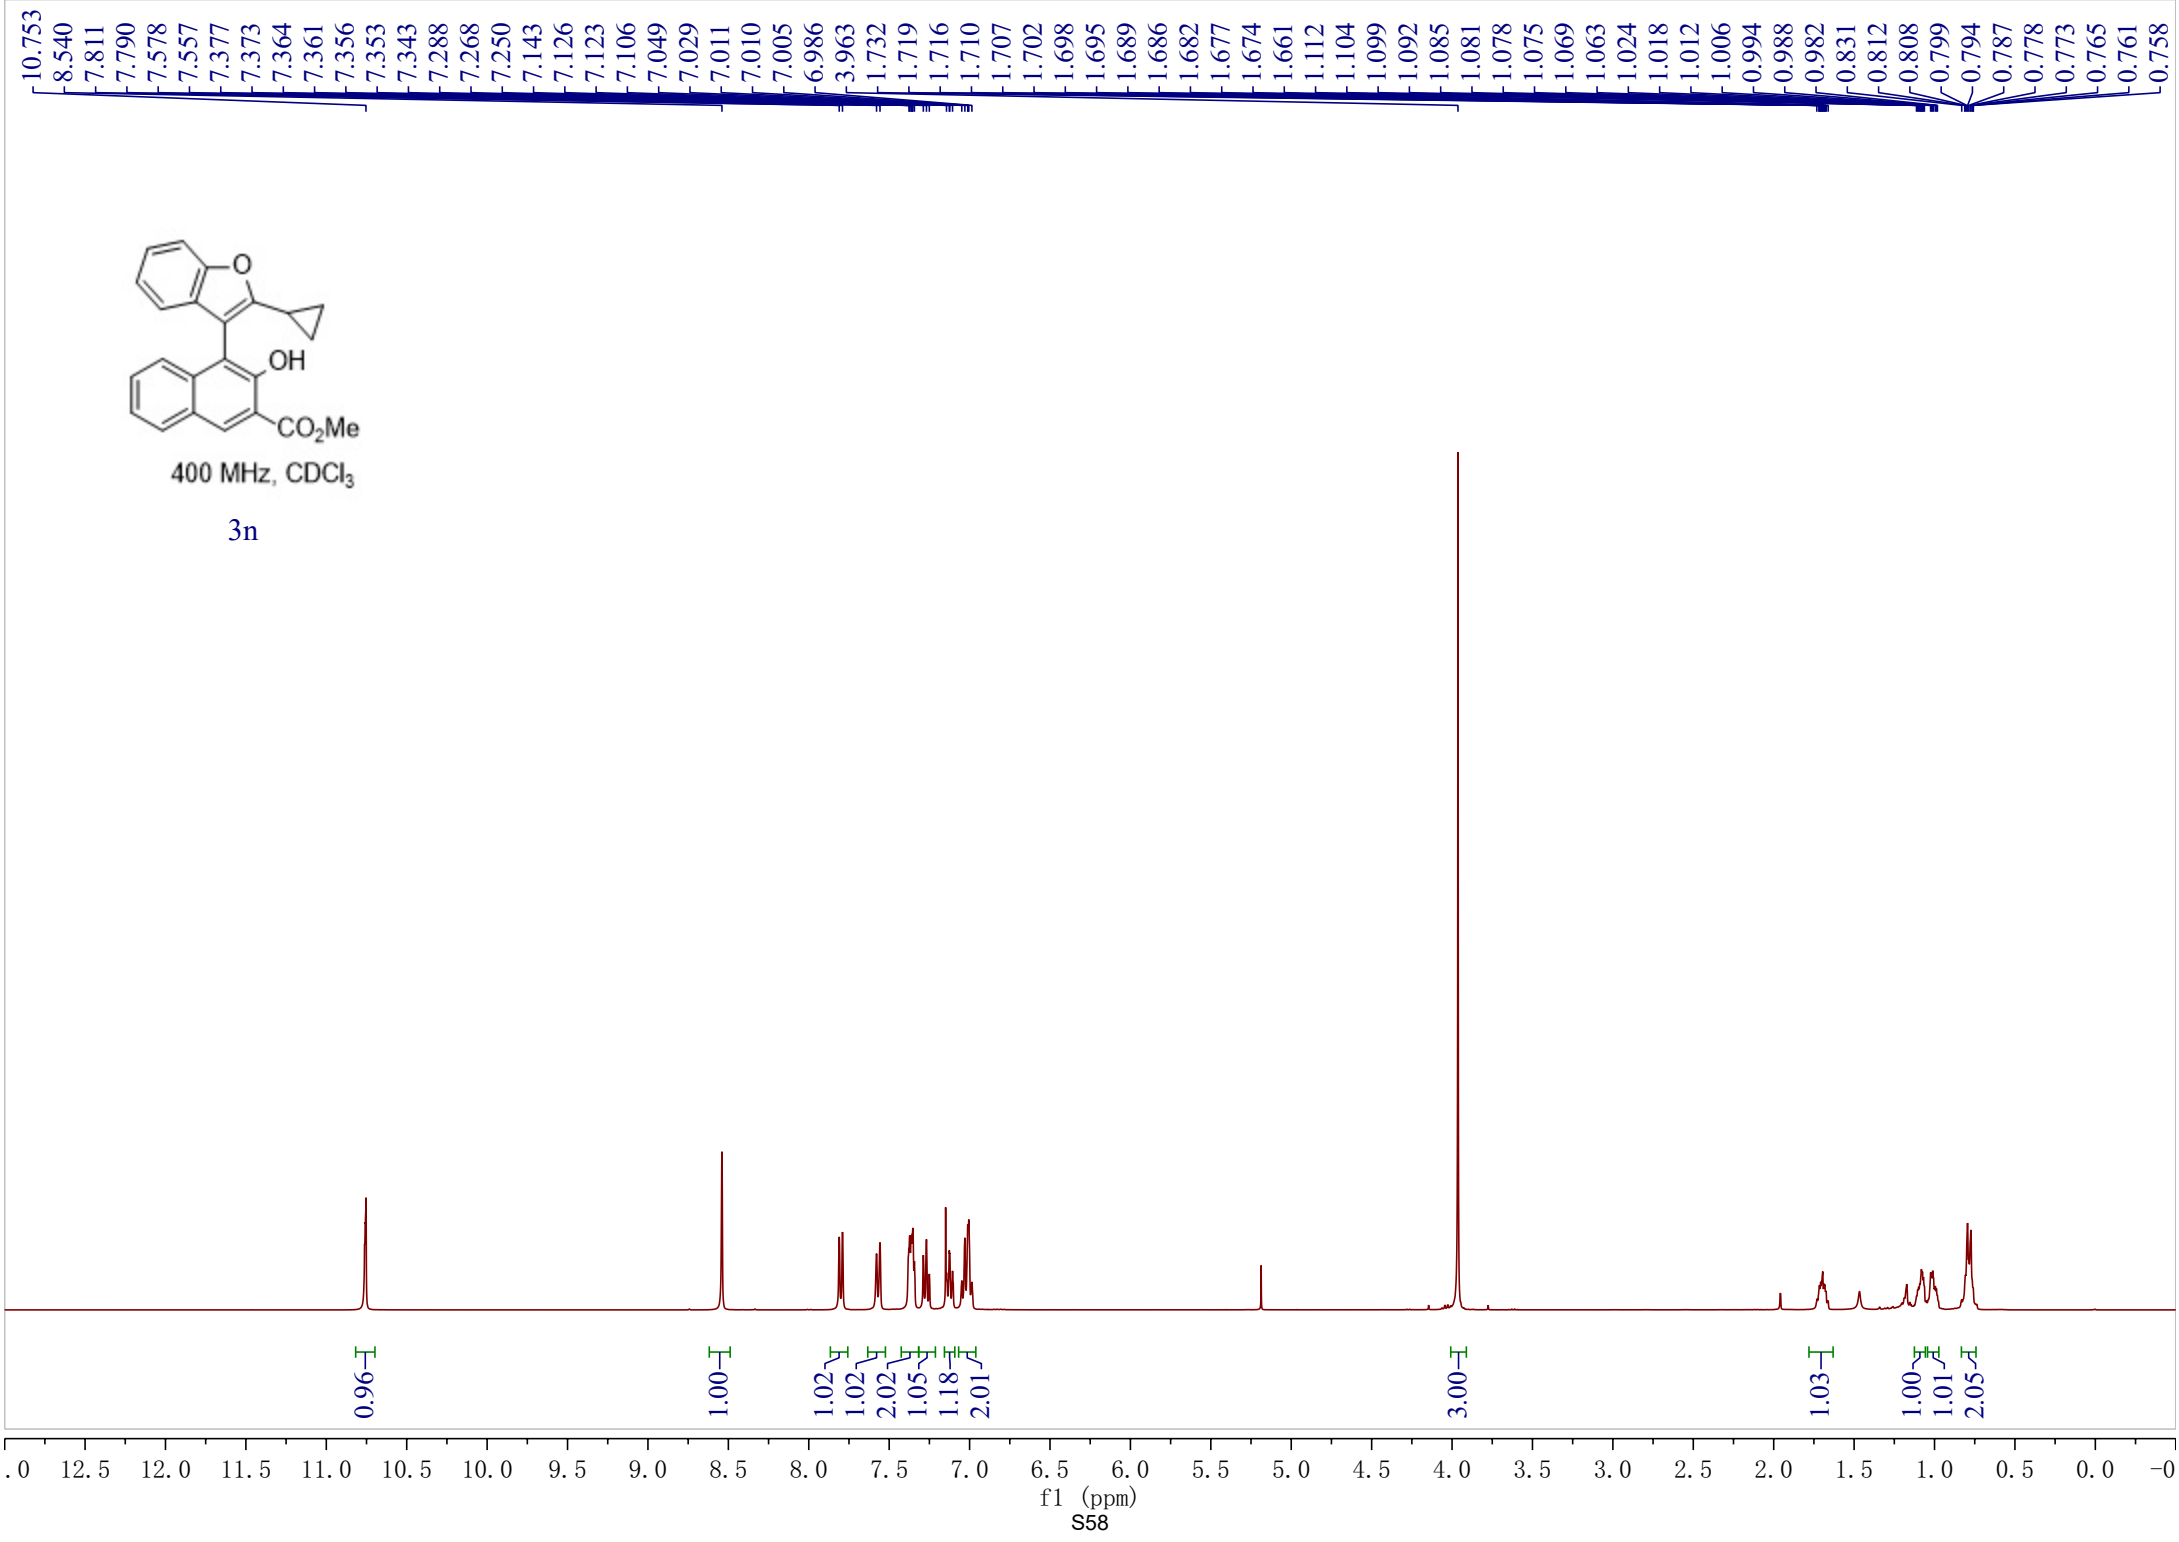

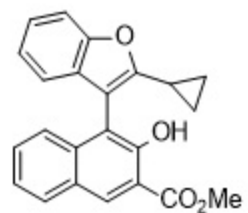

100 MHz, CDCl<sub>3</sub>

3n

— 170.718

— 157.091

— 154.689

— 153.753

— 137.256

— 132.741

— 130.272

— 129.852

— 129.407

— 127.176

— 125.448

— 124.043

— 123.146

— 122.514

— 119.763

— 114.112

— 113.873

— 110.883

— 109.116

— 52.885

— 9.193

— 7.329

— 7.282

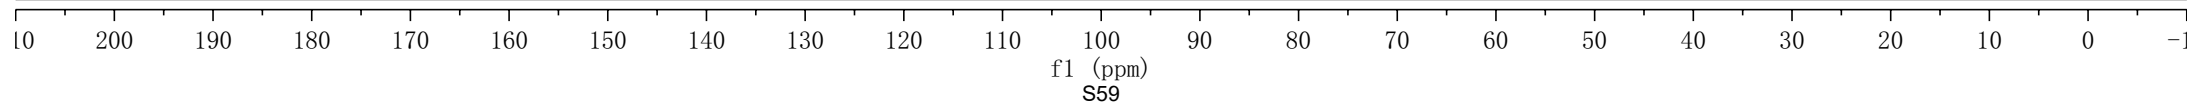

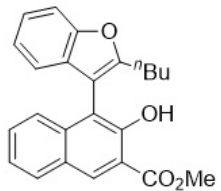

400 MHz, CDCl<sub>3</sub>

3o

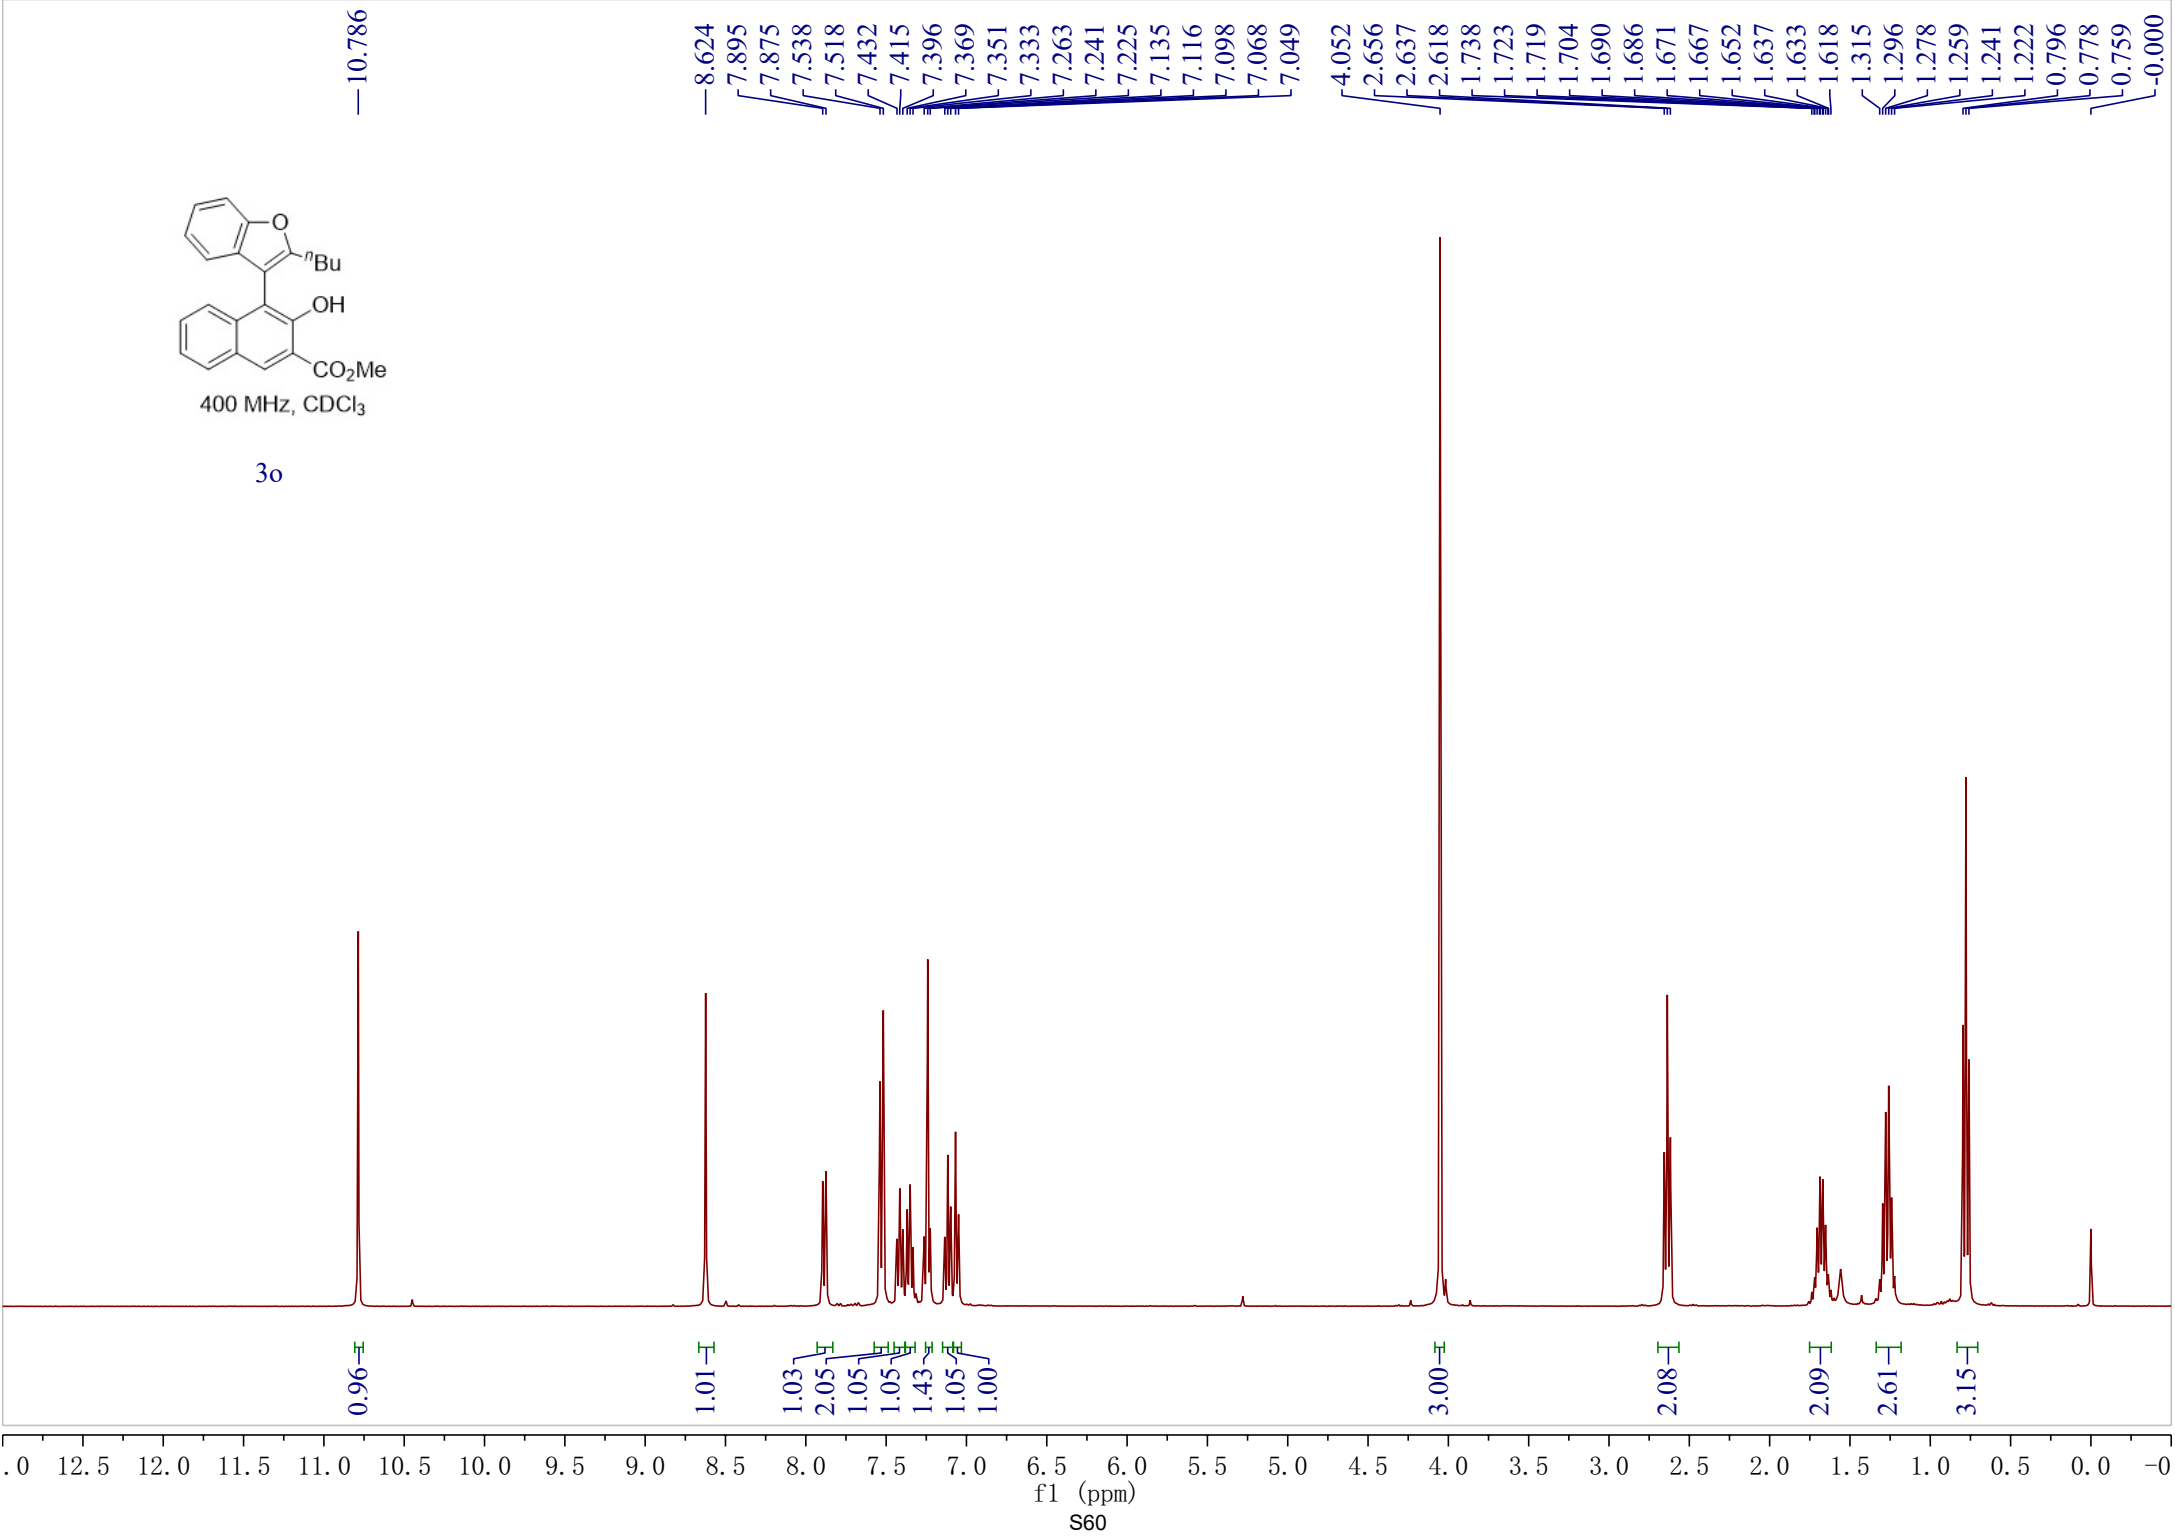

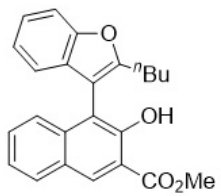

100 MHz, CDCl<sub>3</sub>

3o

— 170.647

157.467

154.502

154.442

137.245

132.723

129.909

129.758

129.343

127.015

125.149

123.982

123.288

122.403

120.000

114.020

113.838

110.980

109.413

— 52.825

~ 29.707

~ 27.202

~ 22.387

— 13.775

200 190 180 170 160 150 140 130 120 110 100 90 80 70 60 50 40 30 20 10 0 -1

f1 (ppm)

S61

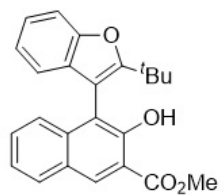

400 MHz, CDCl<sub>3</sub>

3p

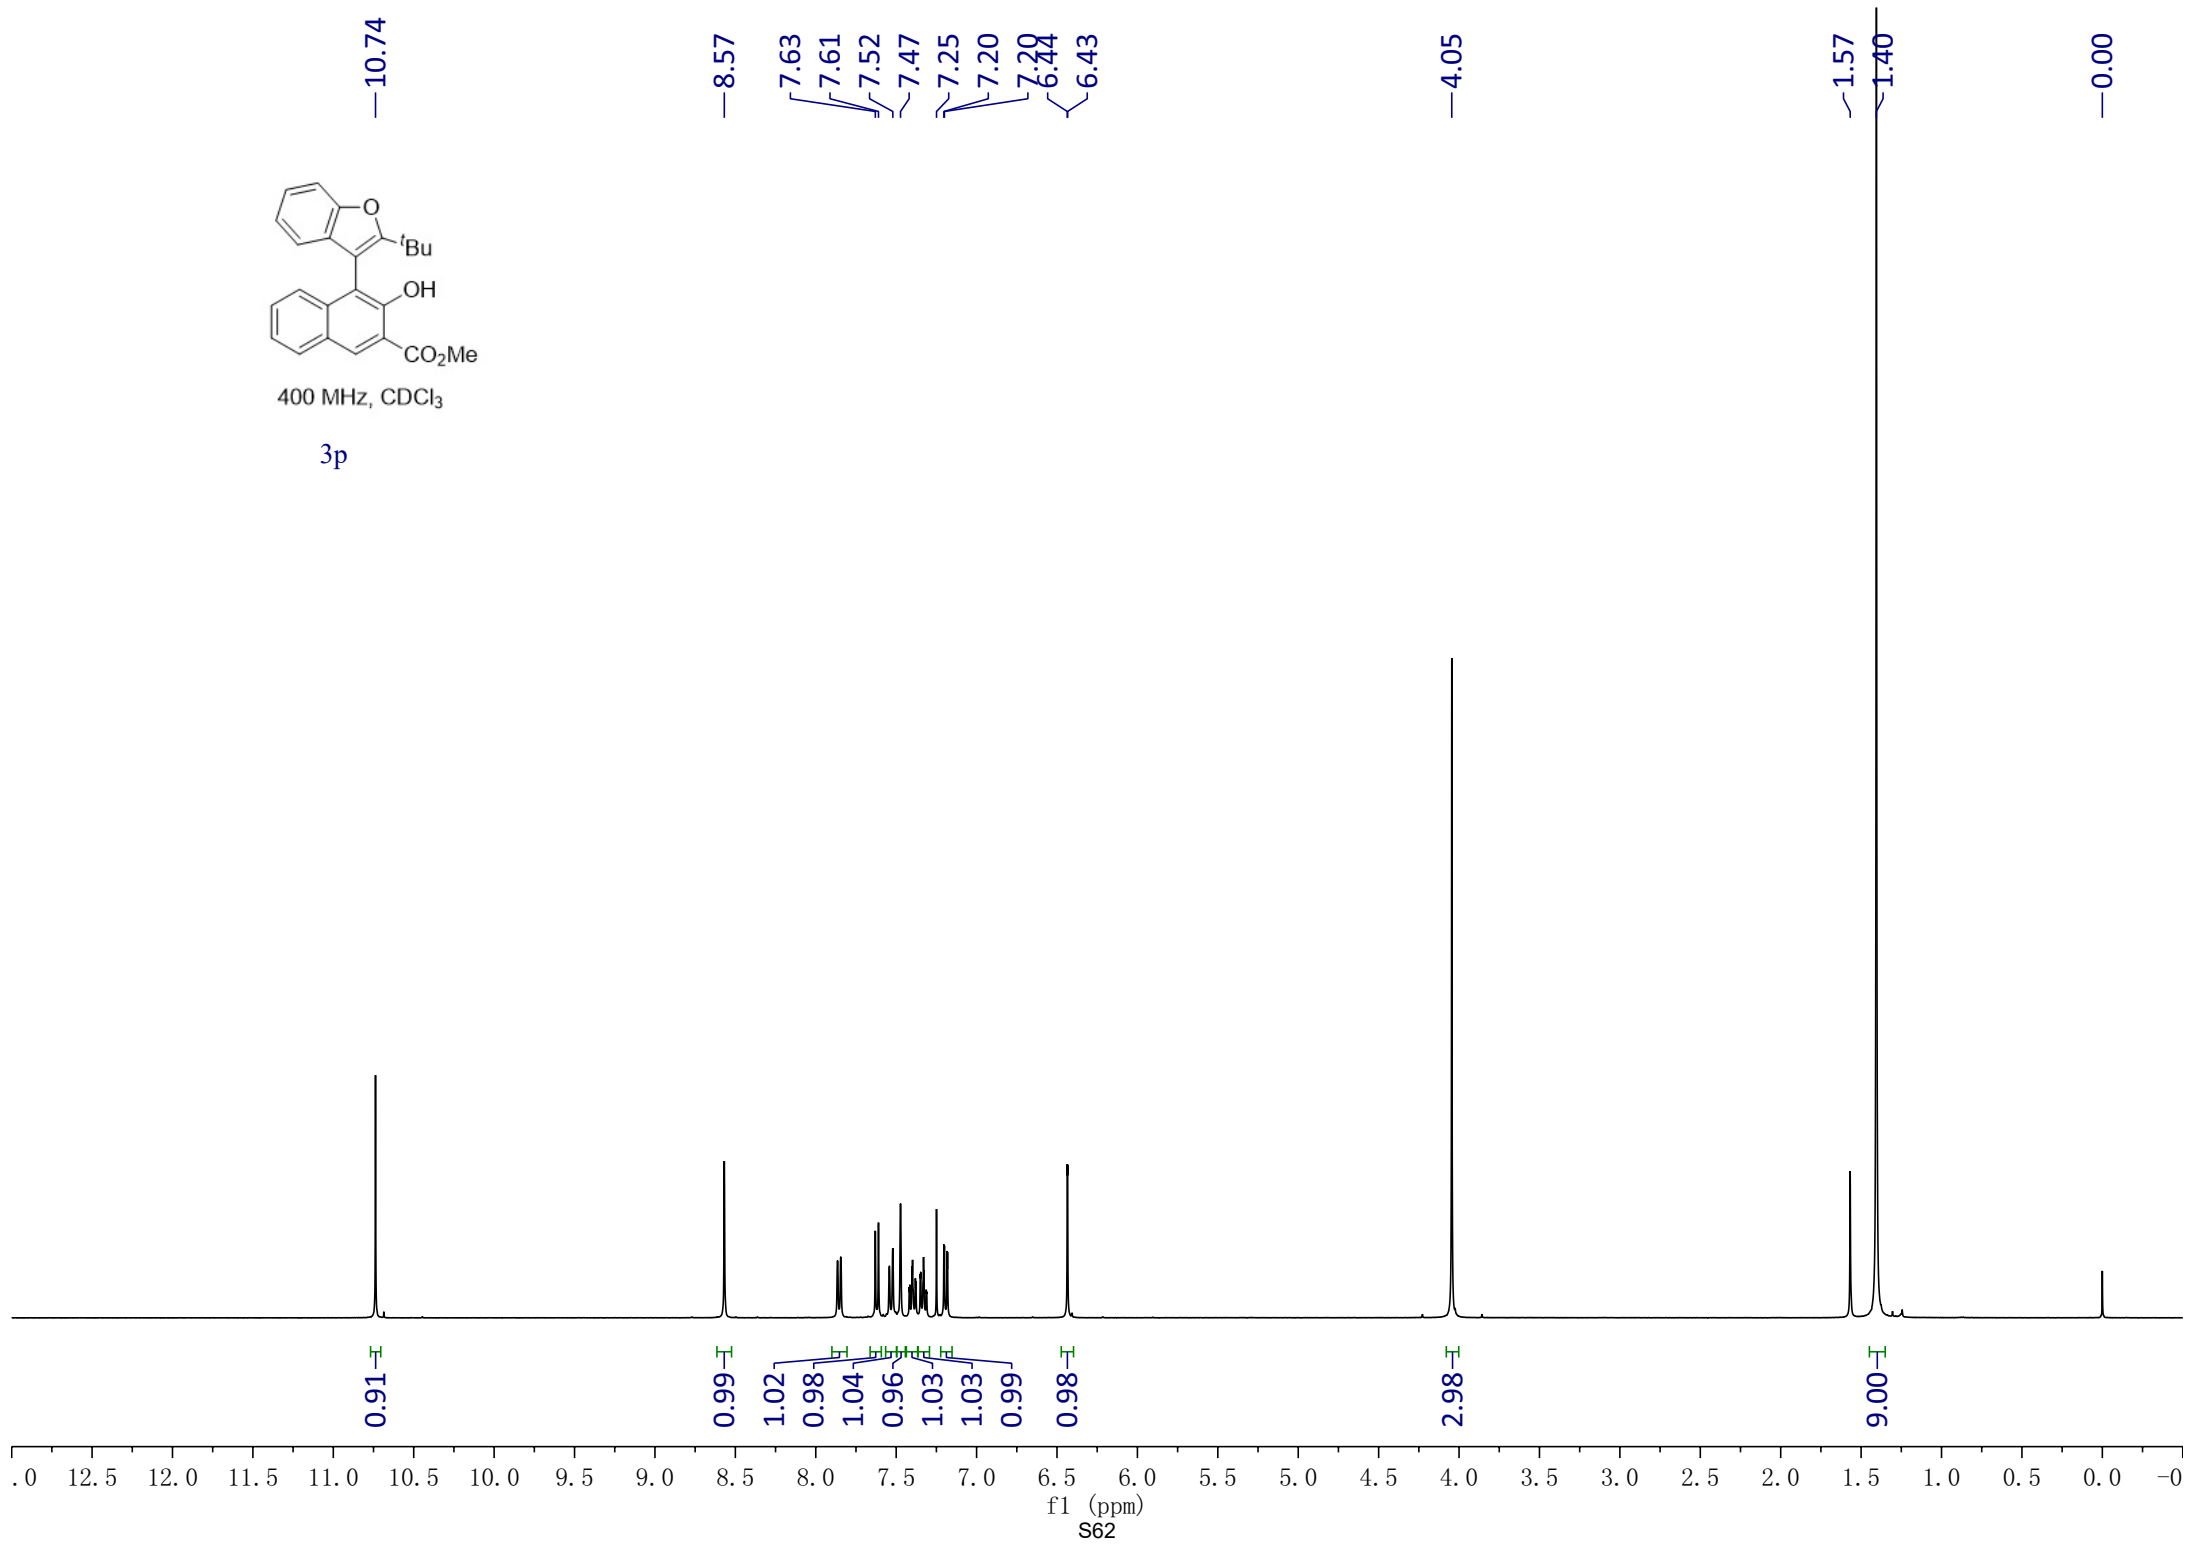



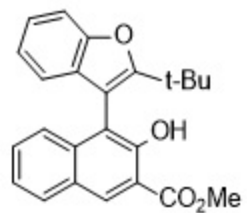

100 MHz, CDCl<sub>3</sub>  
3p

~170.76  
~168.00

~154.92  
~153.31

137.28  
132.09  
130.43  
129.59  
129.17  
128.47  
127.02  
125.32  
123.90  
120.35  
113.93  
113.24  
99.12

—52.87

—33.18  
—29.03

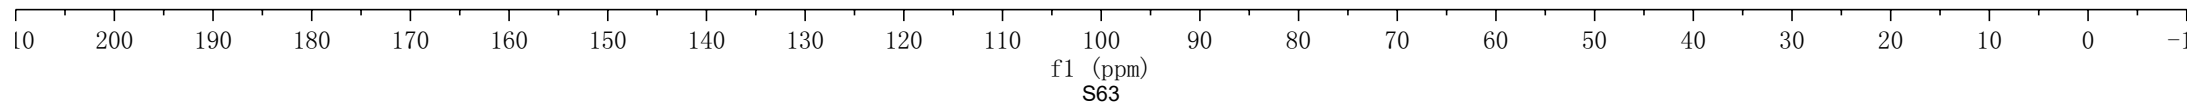

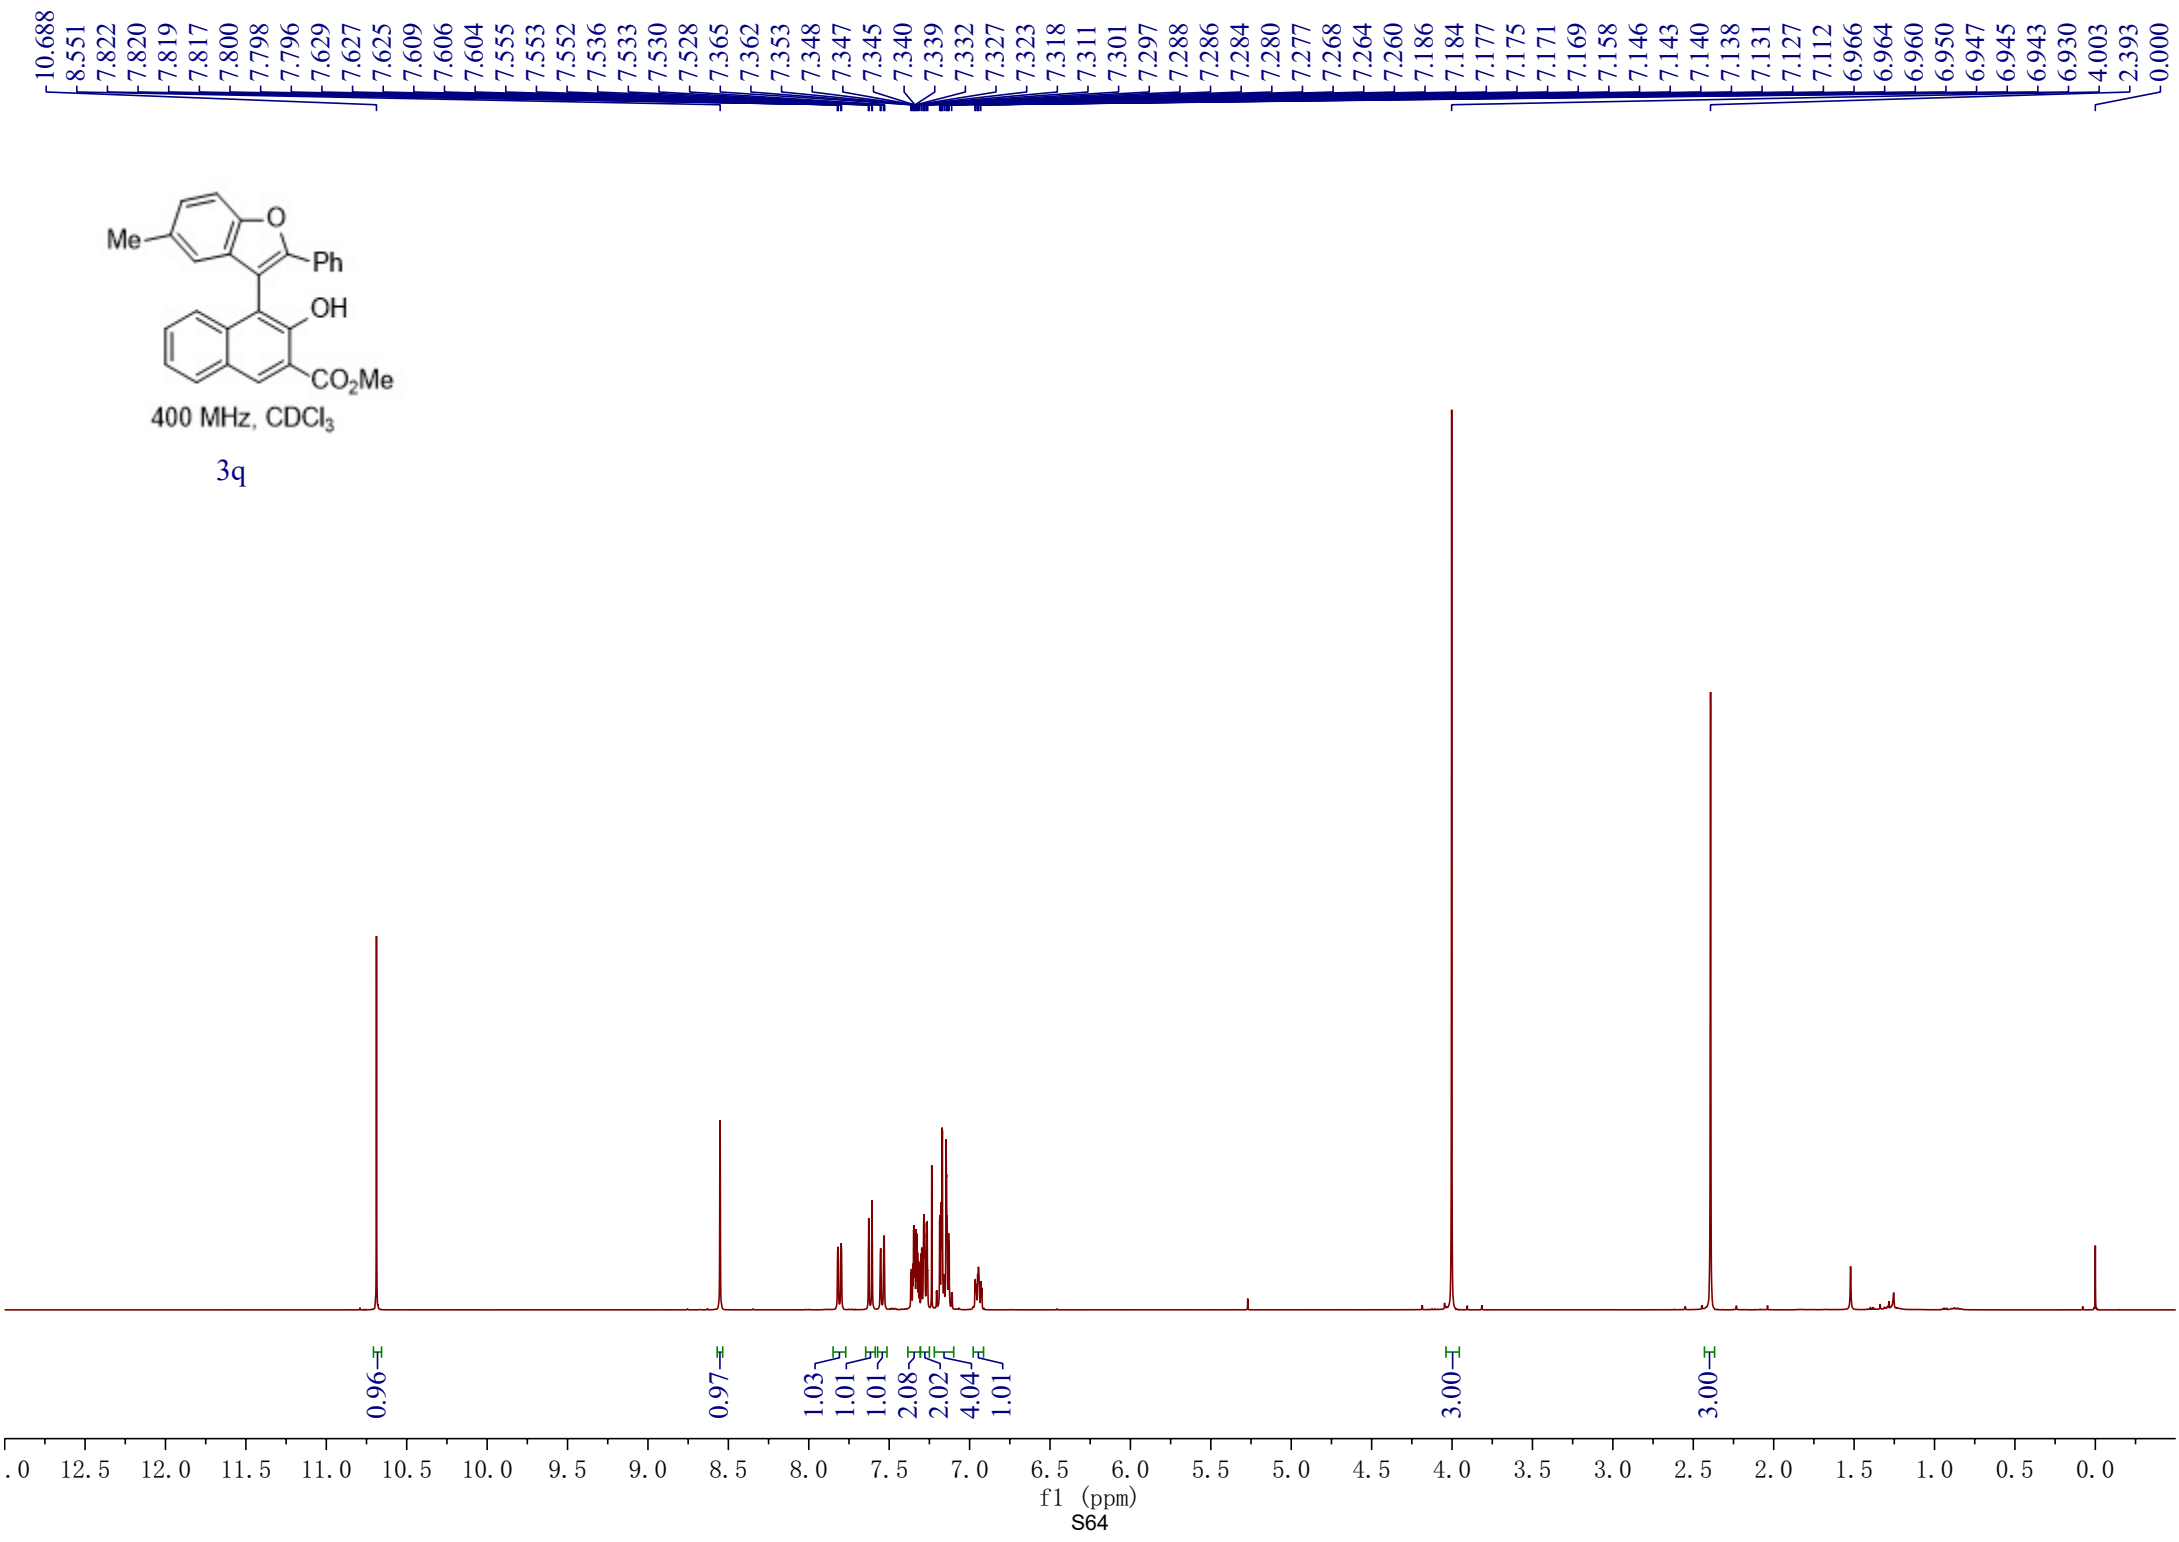

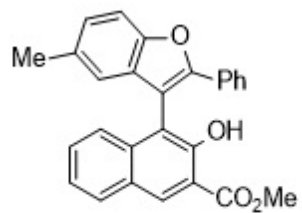

100 MHz, CDCl<sub>3</sub>

**3q**

—170.485

154.686

154.669

137.788

137.030

132.835

130.511

130.469

130.054

130.021

129.706

129.346

128.880

126.956

125.363

124.859

124.244

123.904

122.700

120.592

113.982

113.884

111.699

111.364

—52.734

—20.532

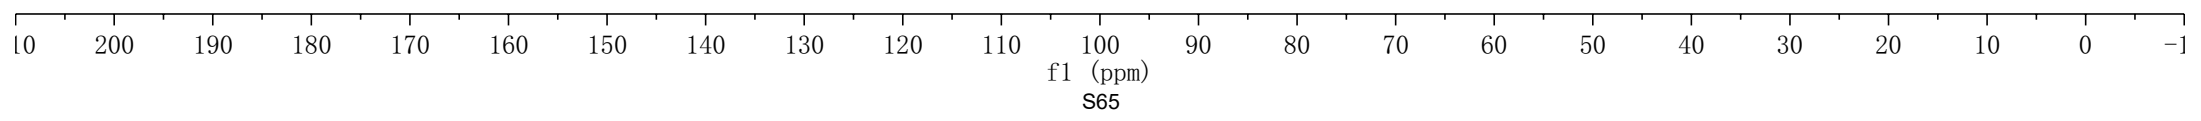

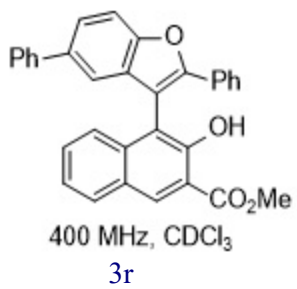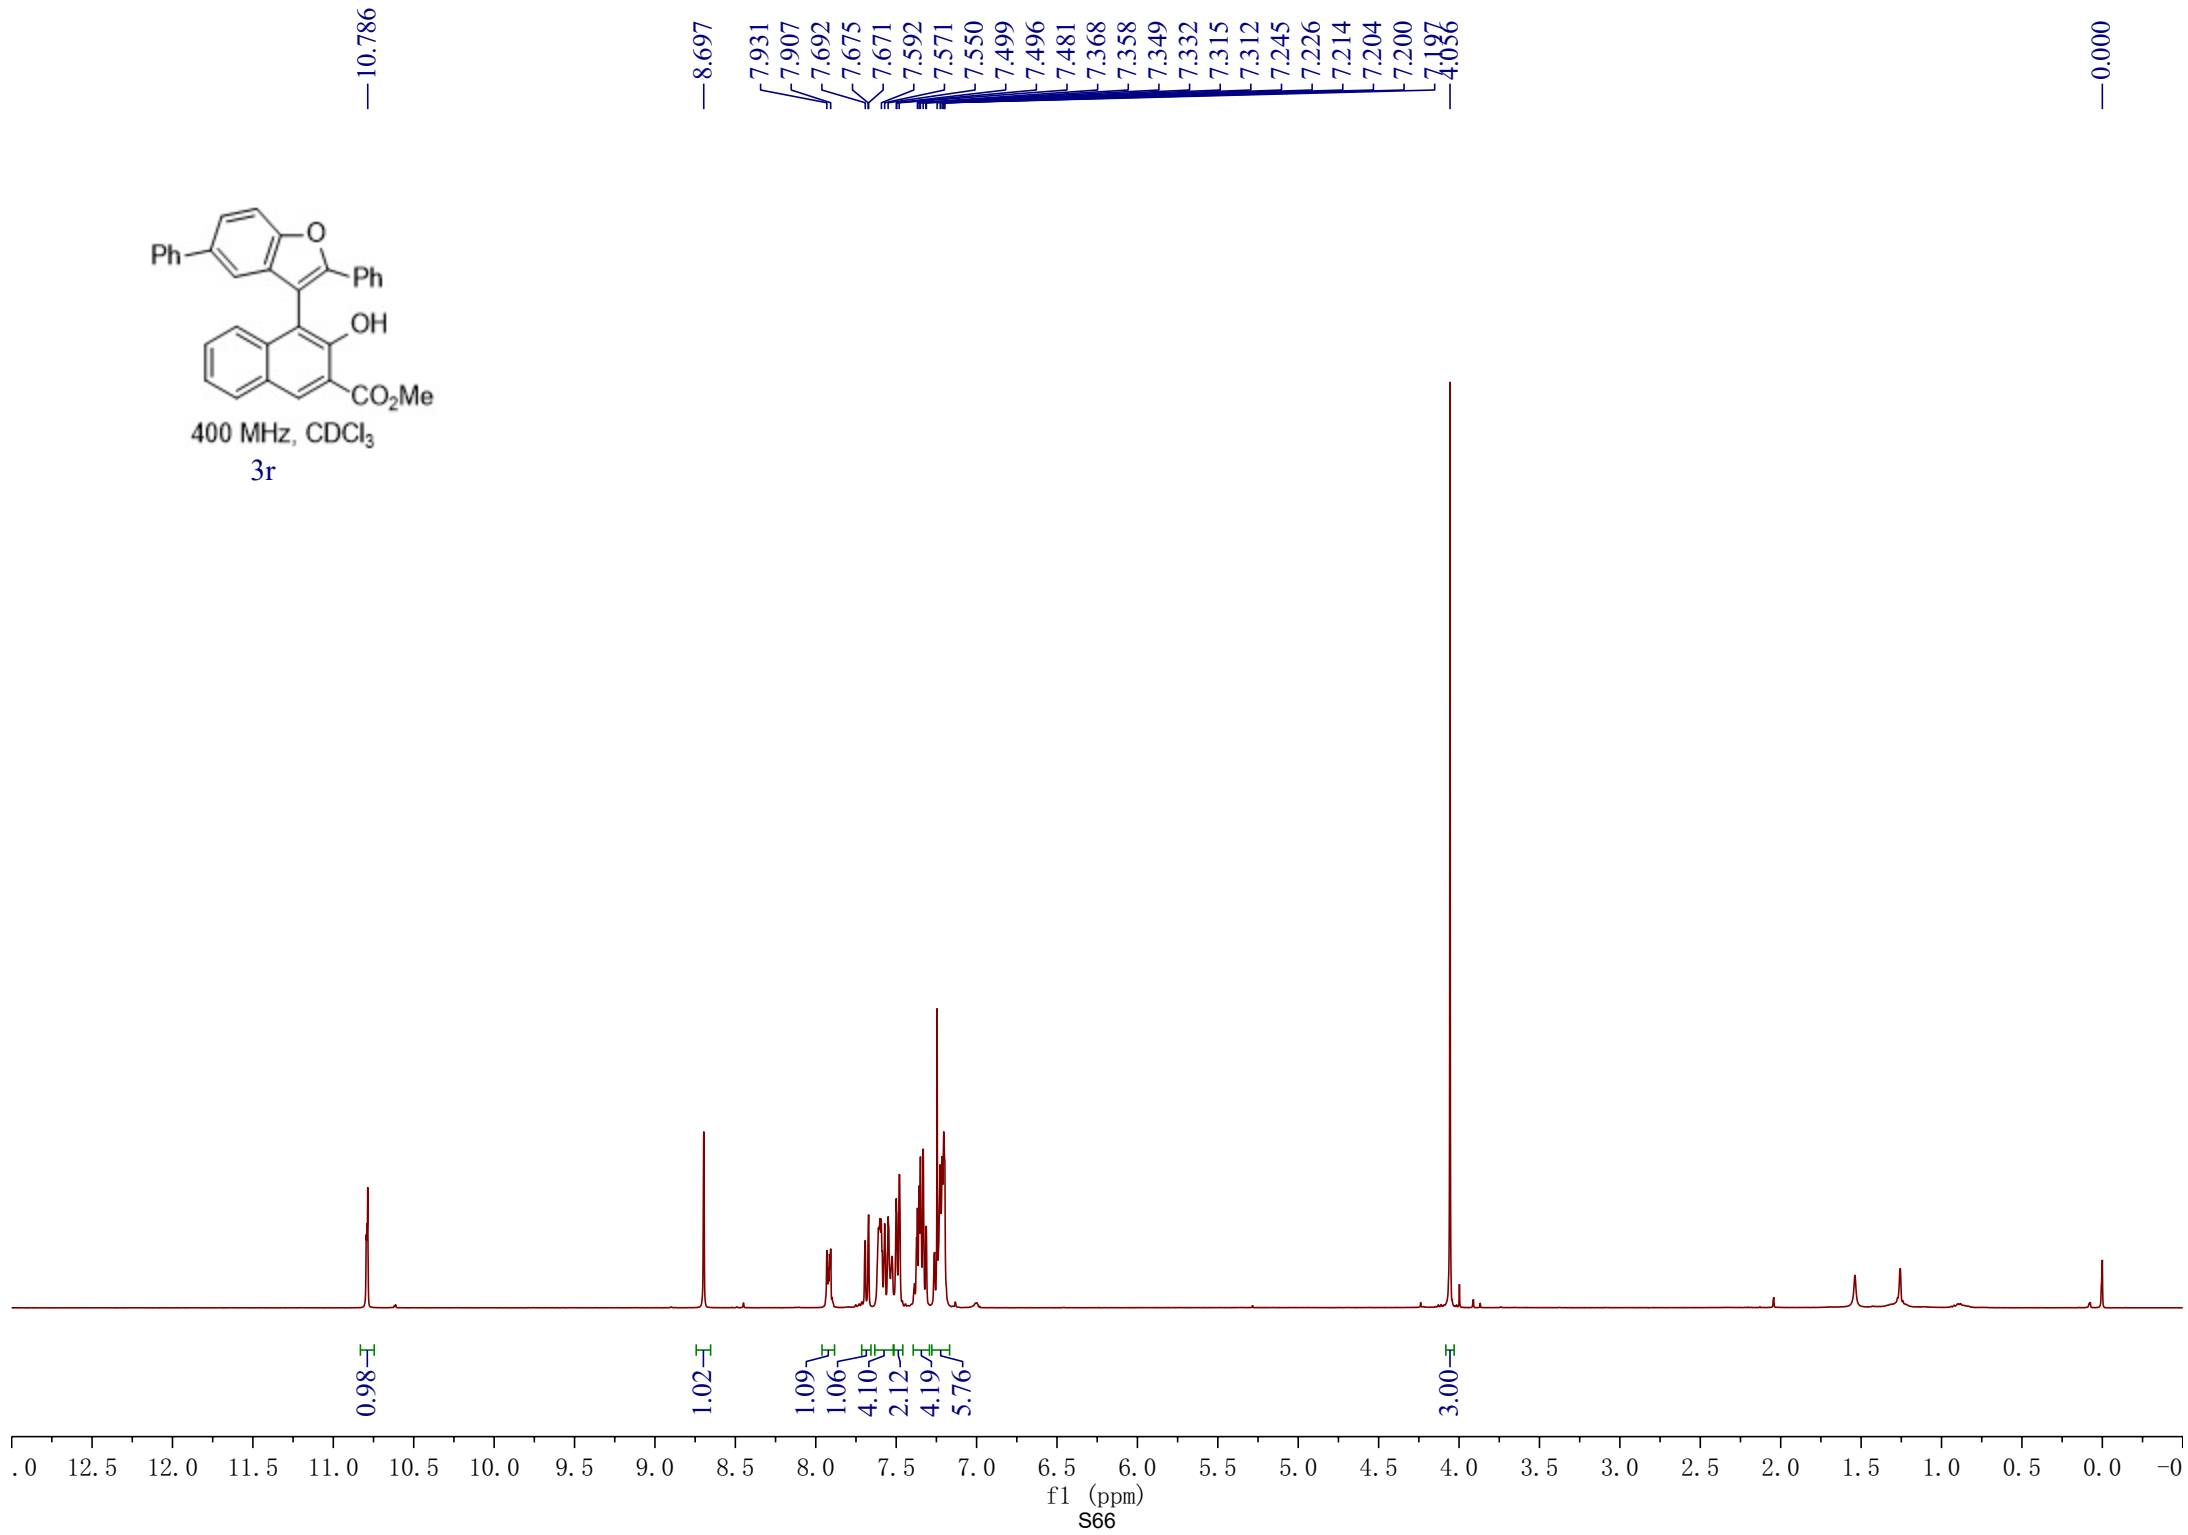

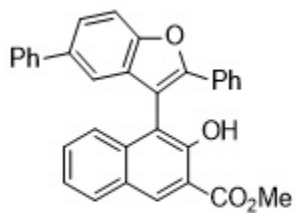

100 MHz, CDCl<sub>3</sub>  
3r

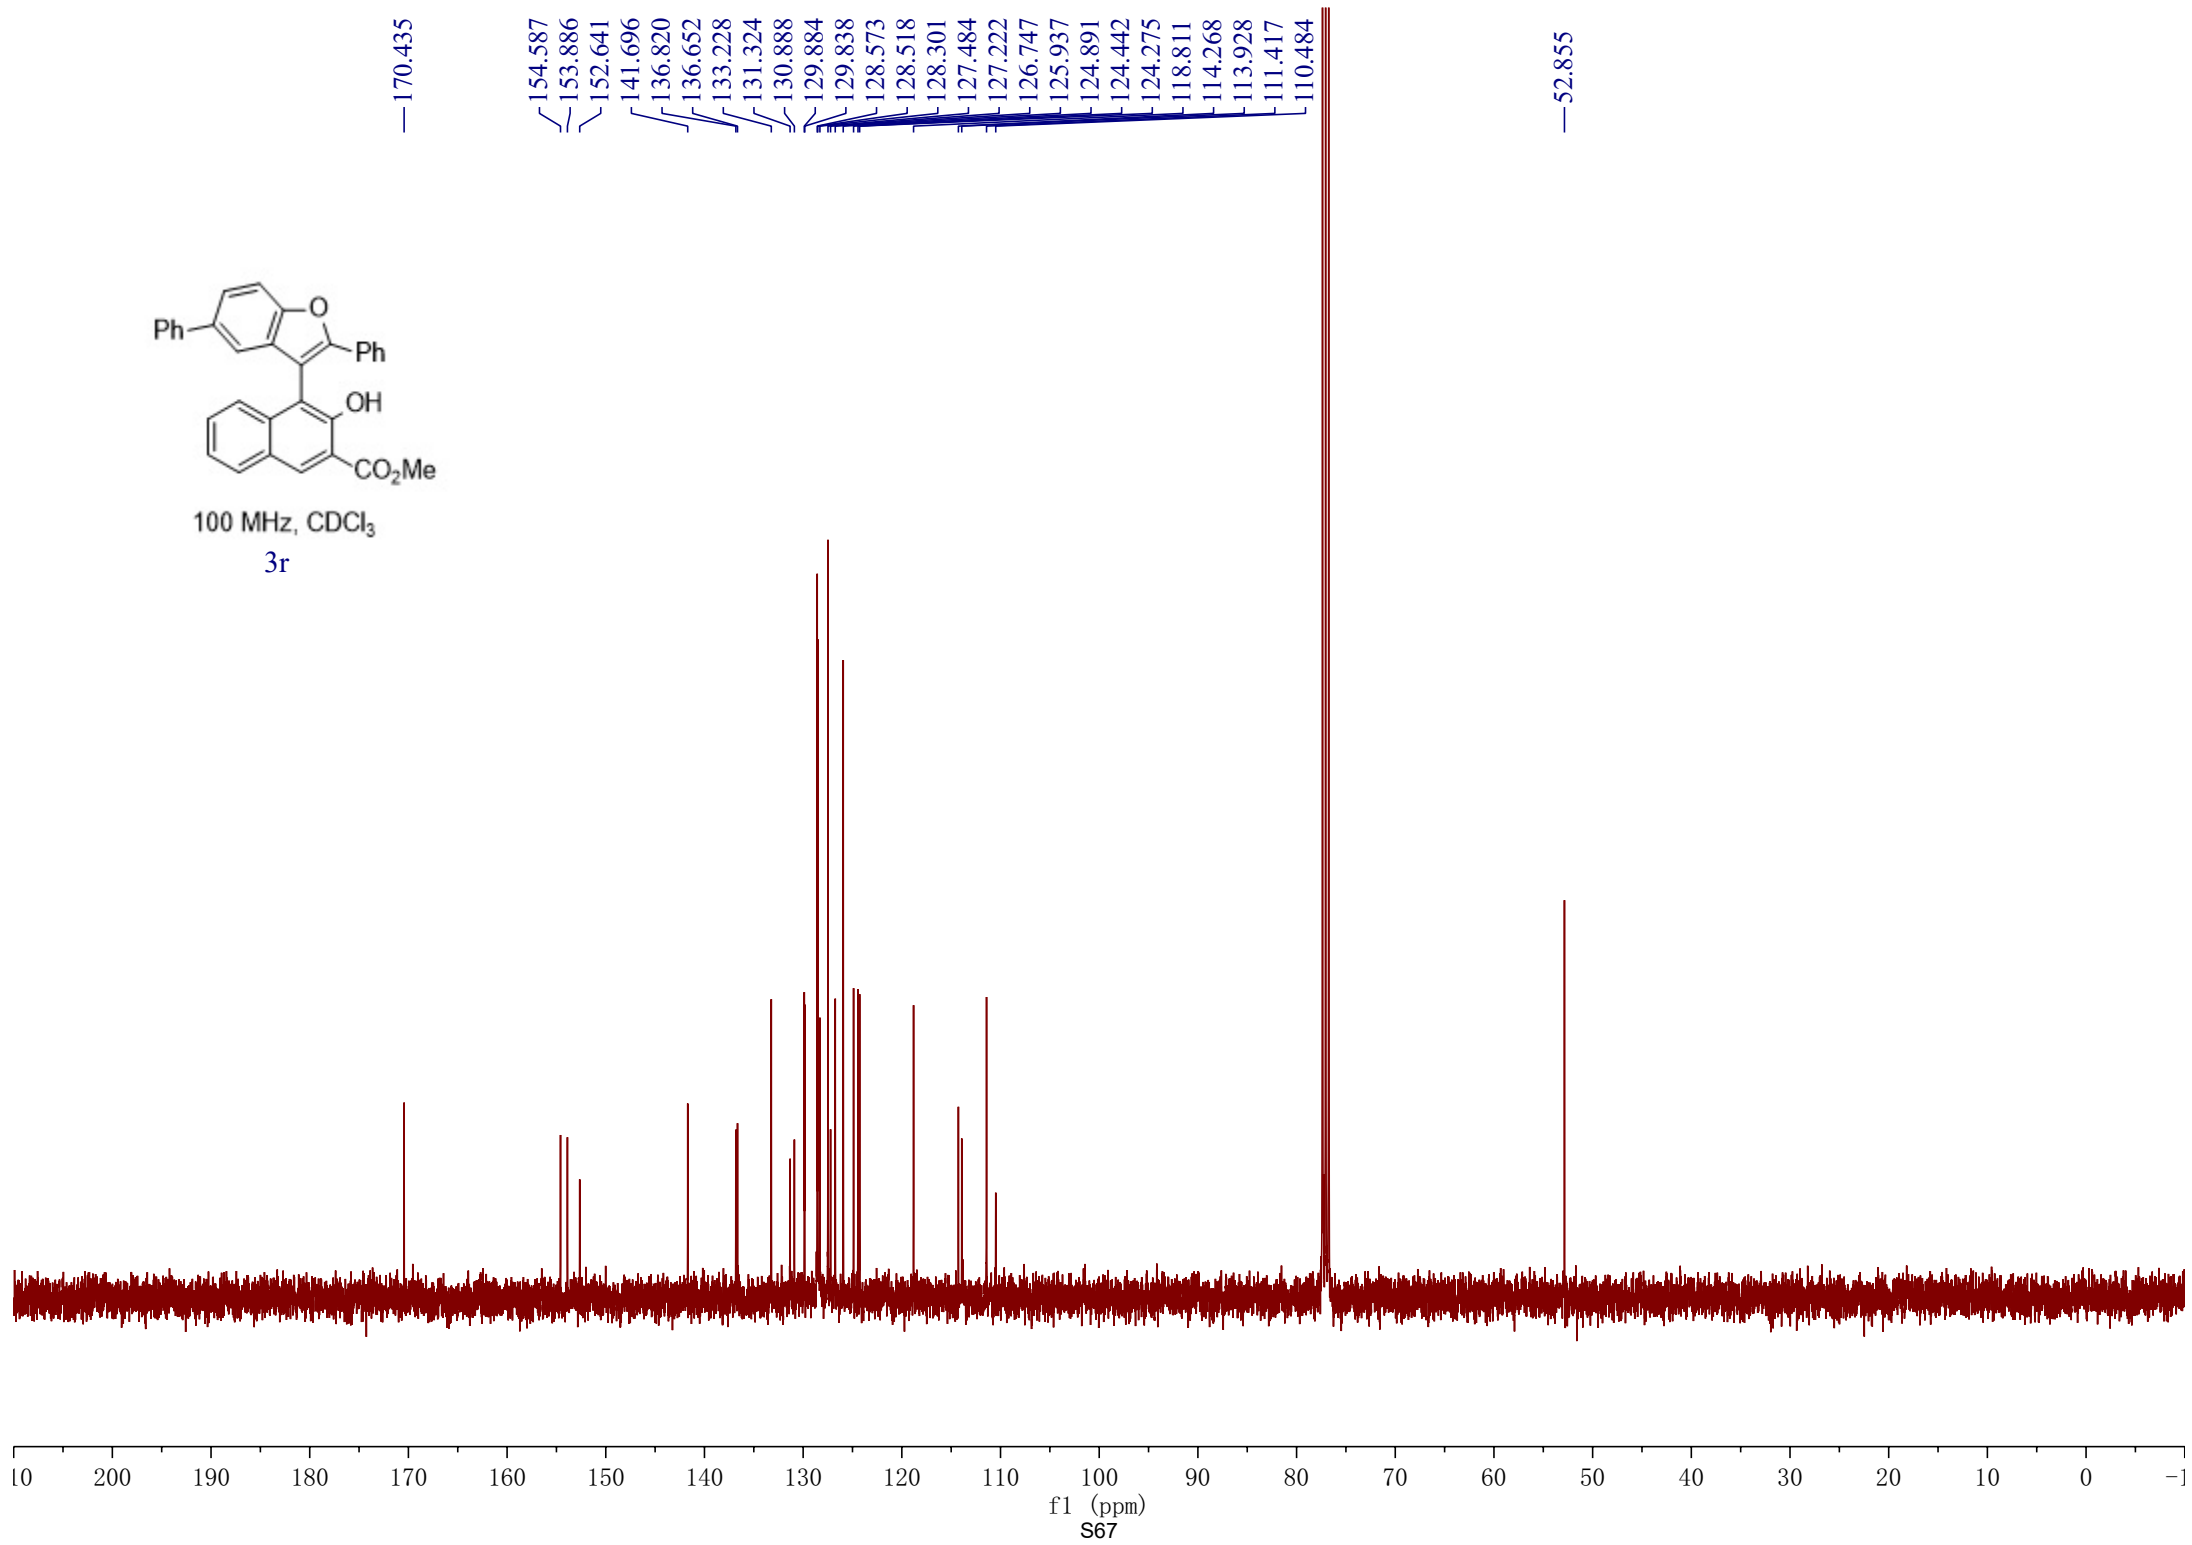

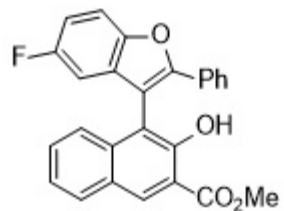

400 MHz, CDCl<sub>3</sub>

3s

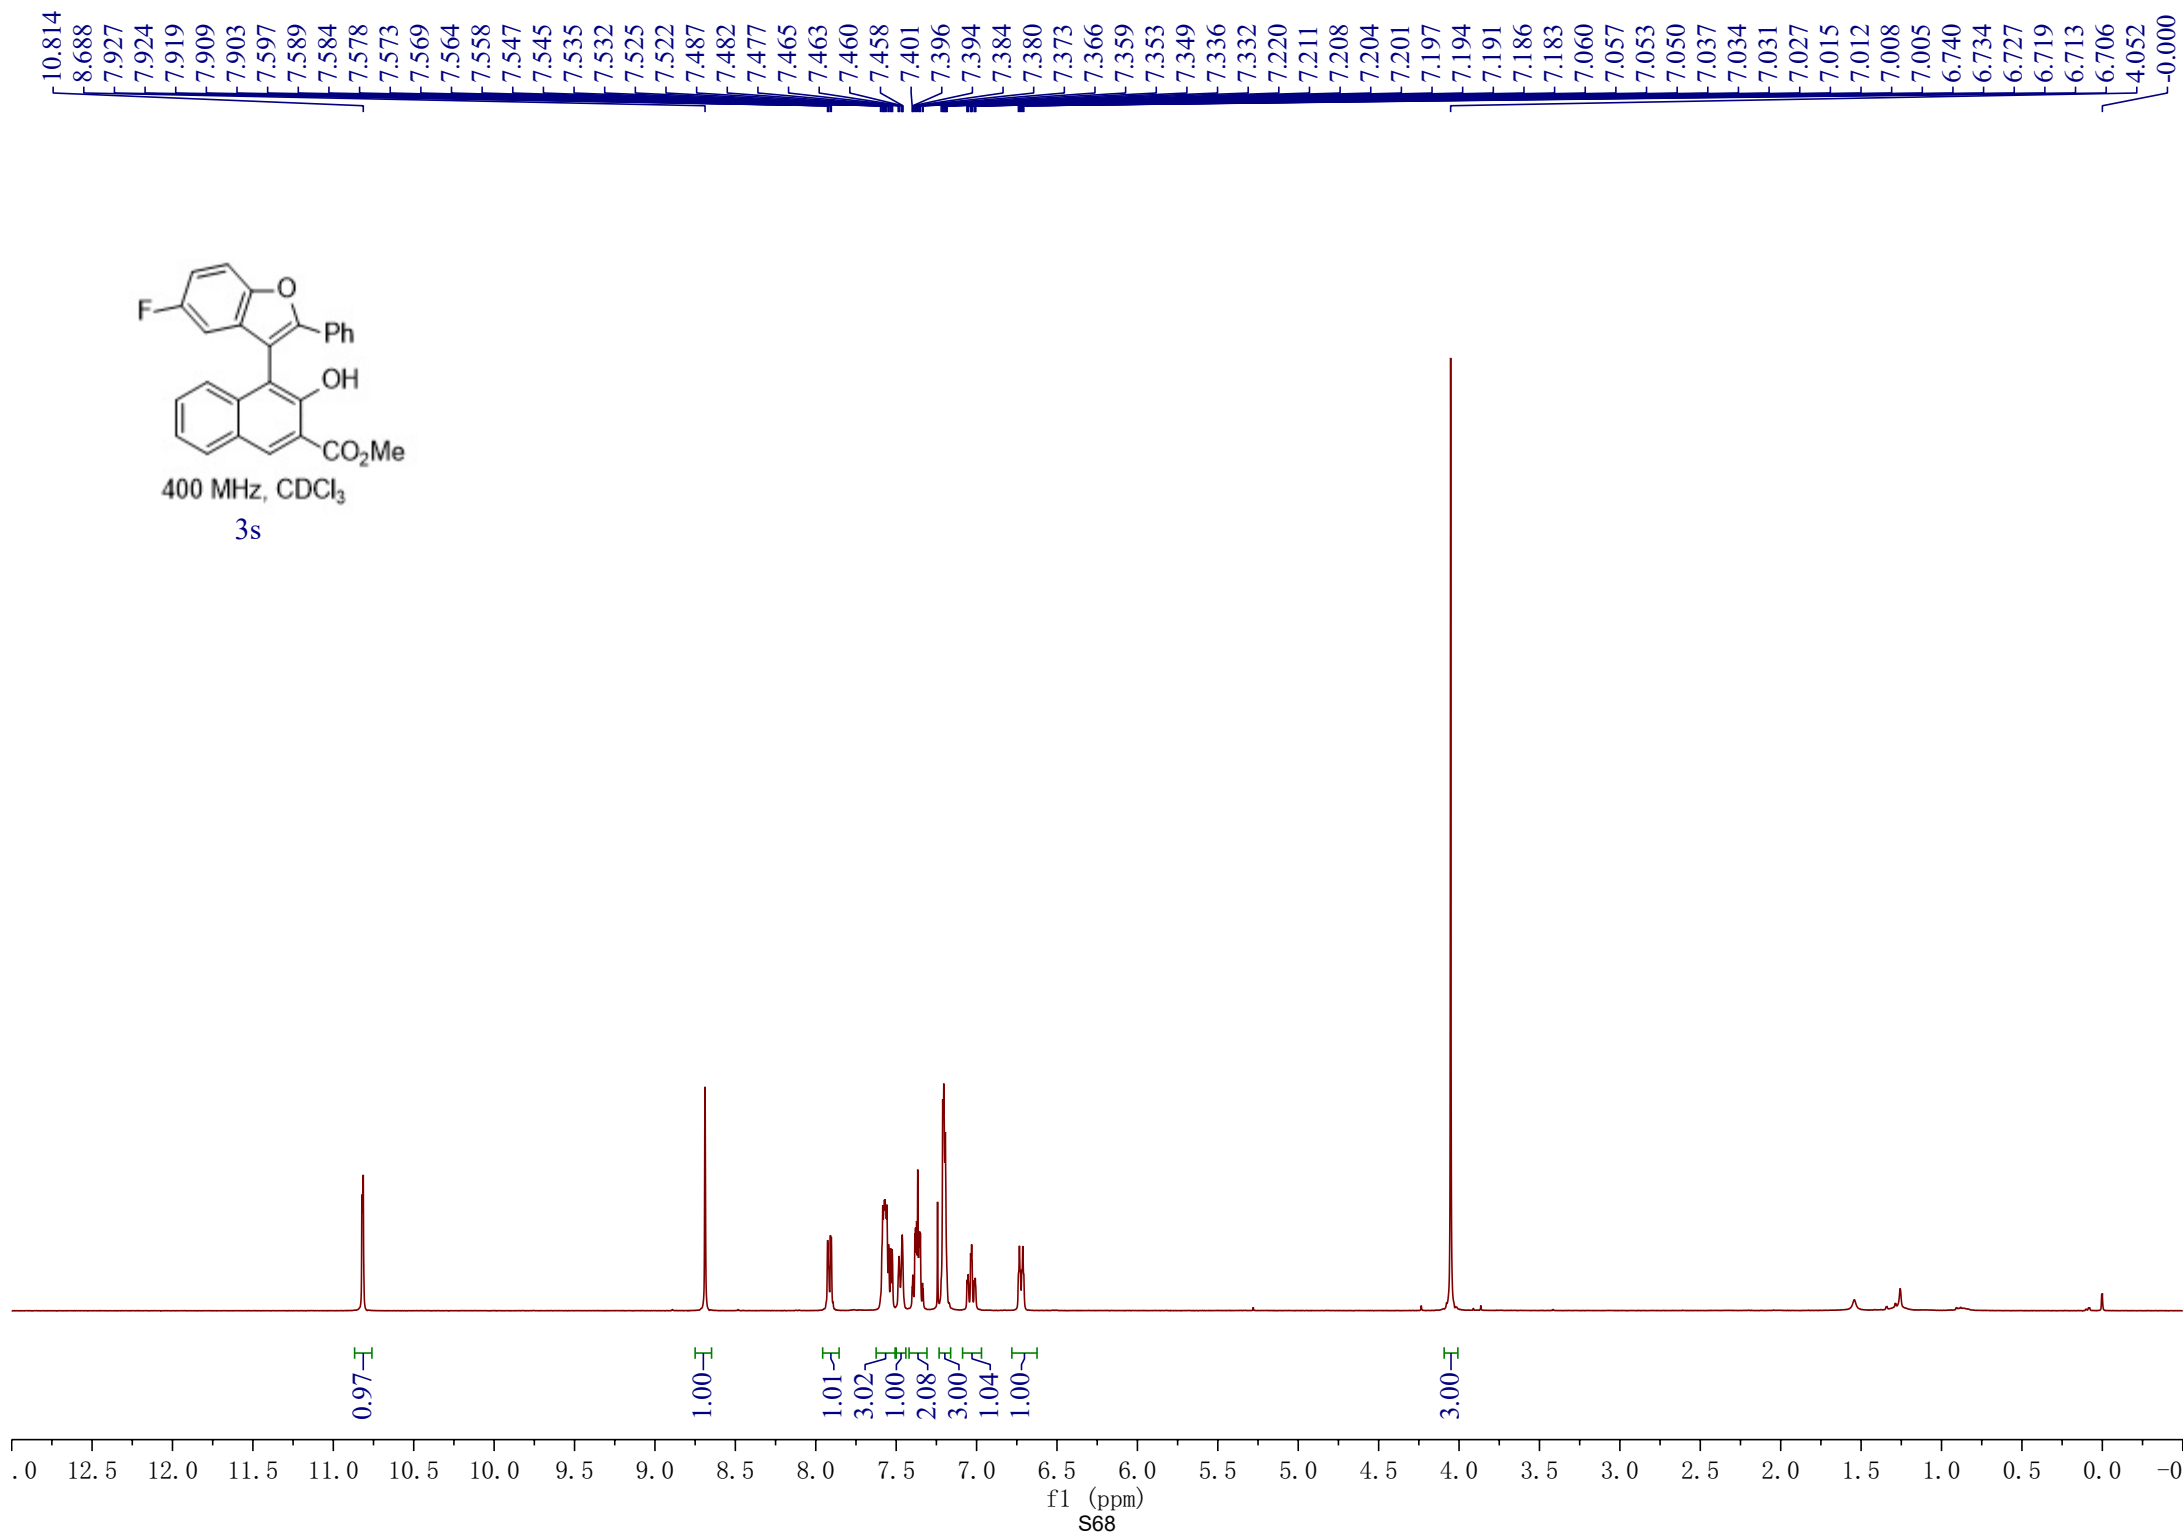

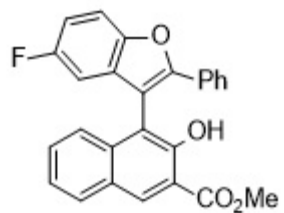

100 MHz, CDCl<sub>3</sub>

3s

- 170.406
- 160.641
- 158.270
- 154.550
- 153.817
- 150.408
- 133.394
- 129.956
- 129.924
- 128.545
- 127.220
- 125.984
- 124.659
- 124.324
- 124.250
- 113.422
- 112.480
- 112.217
- 111.956
- 111.862
- 110.518
- 110.477
- 106.036
- 105.787
- 52.882

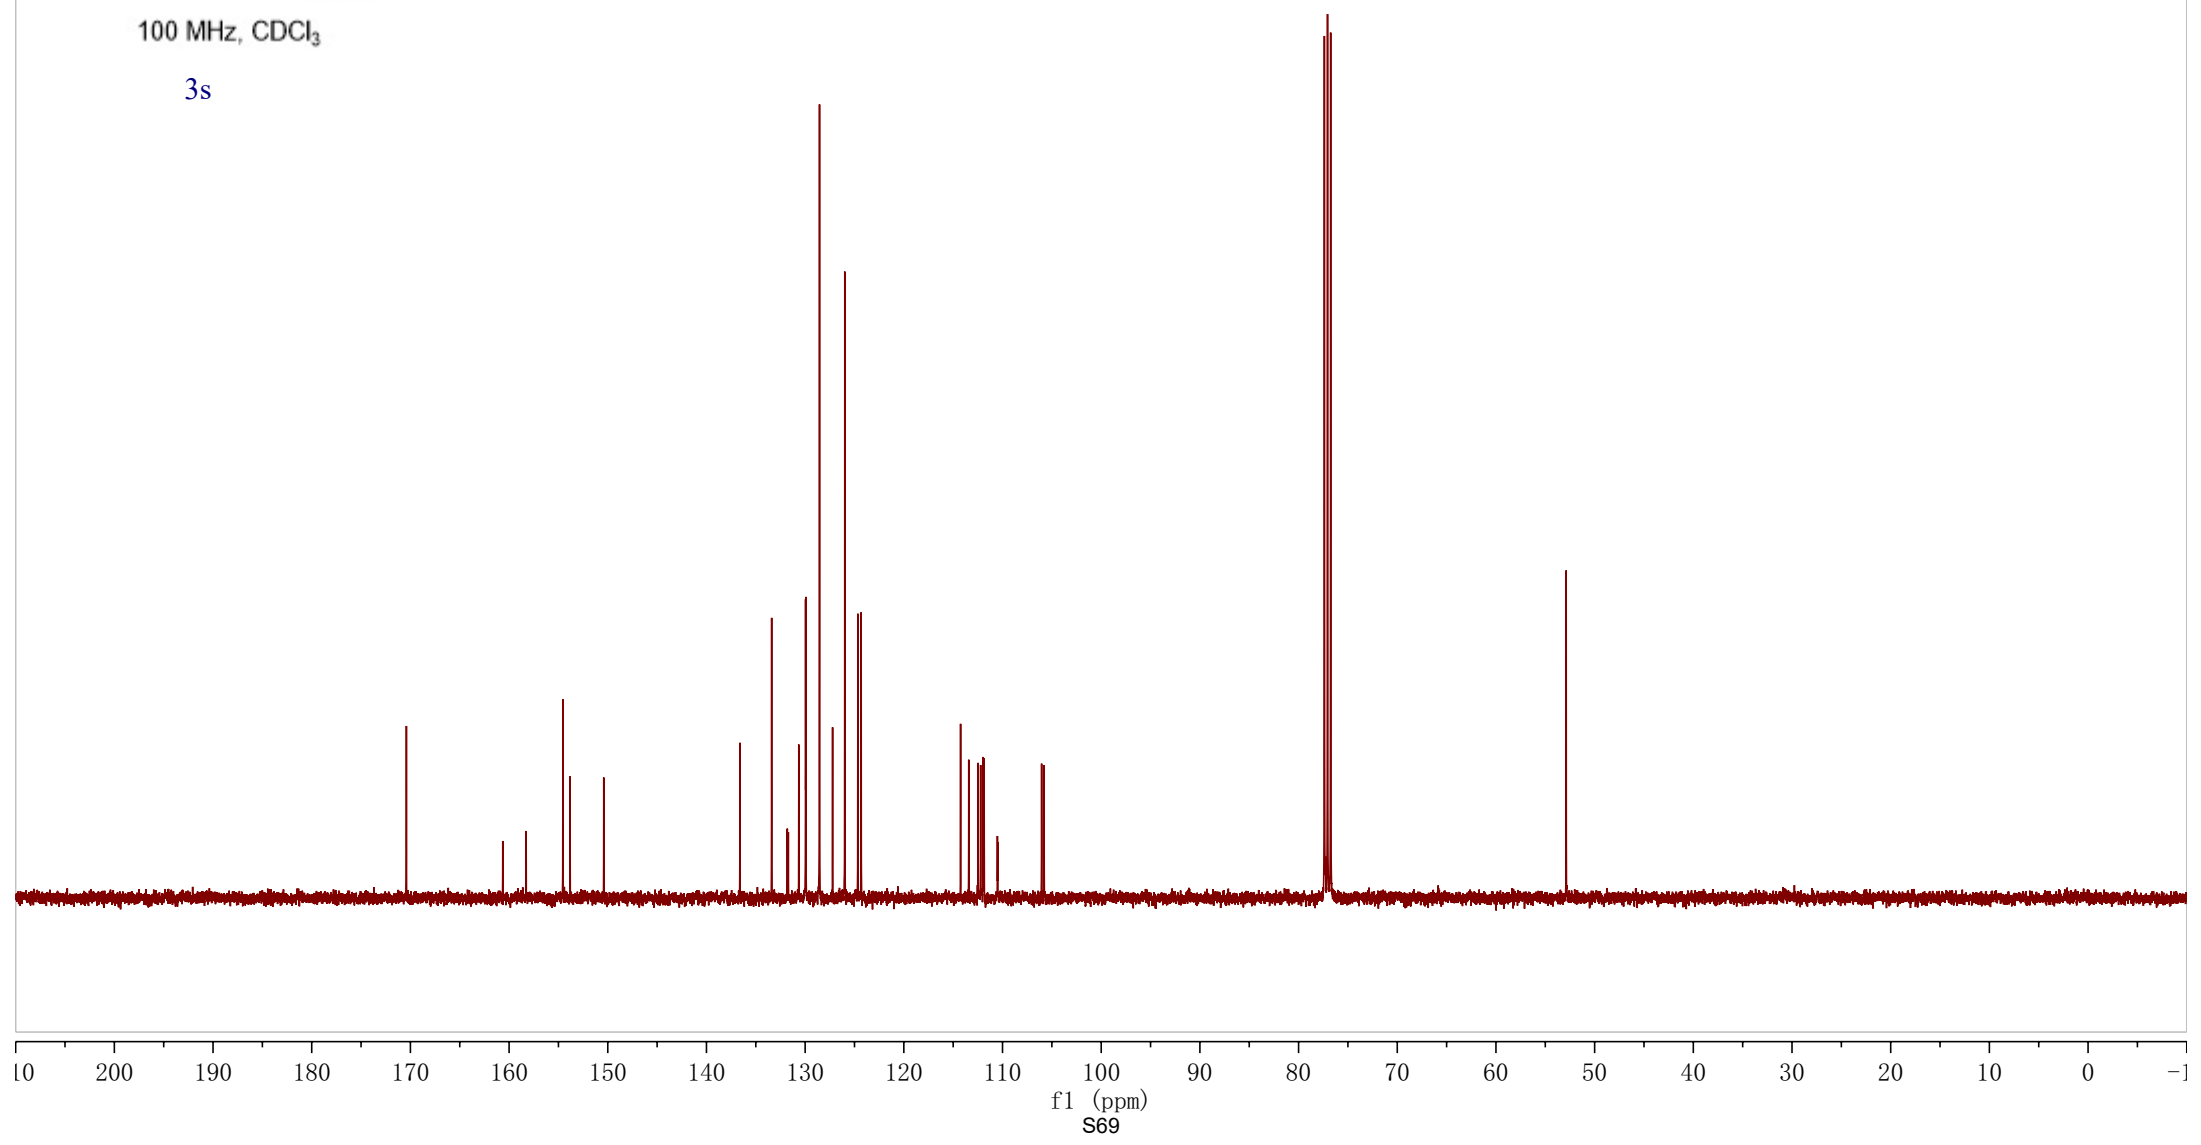

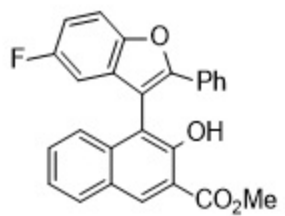

376 MHz, CDCl<sub>3</sub>

3s

—120.744

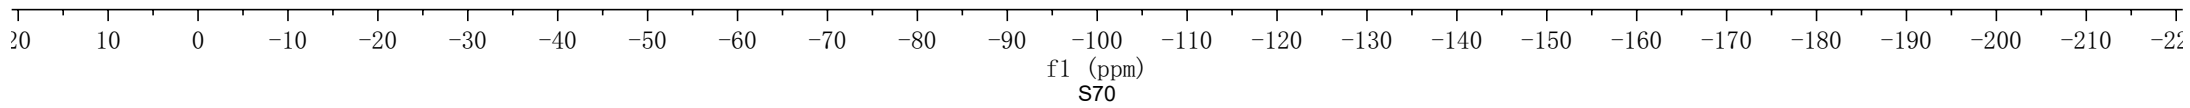



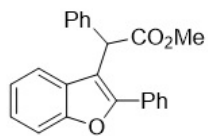

**5a**

300 MHz, CDCl<sub>3</sub>

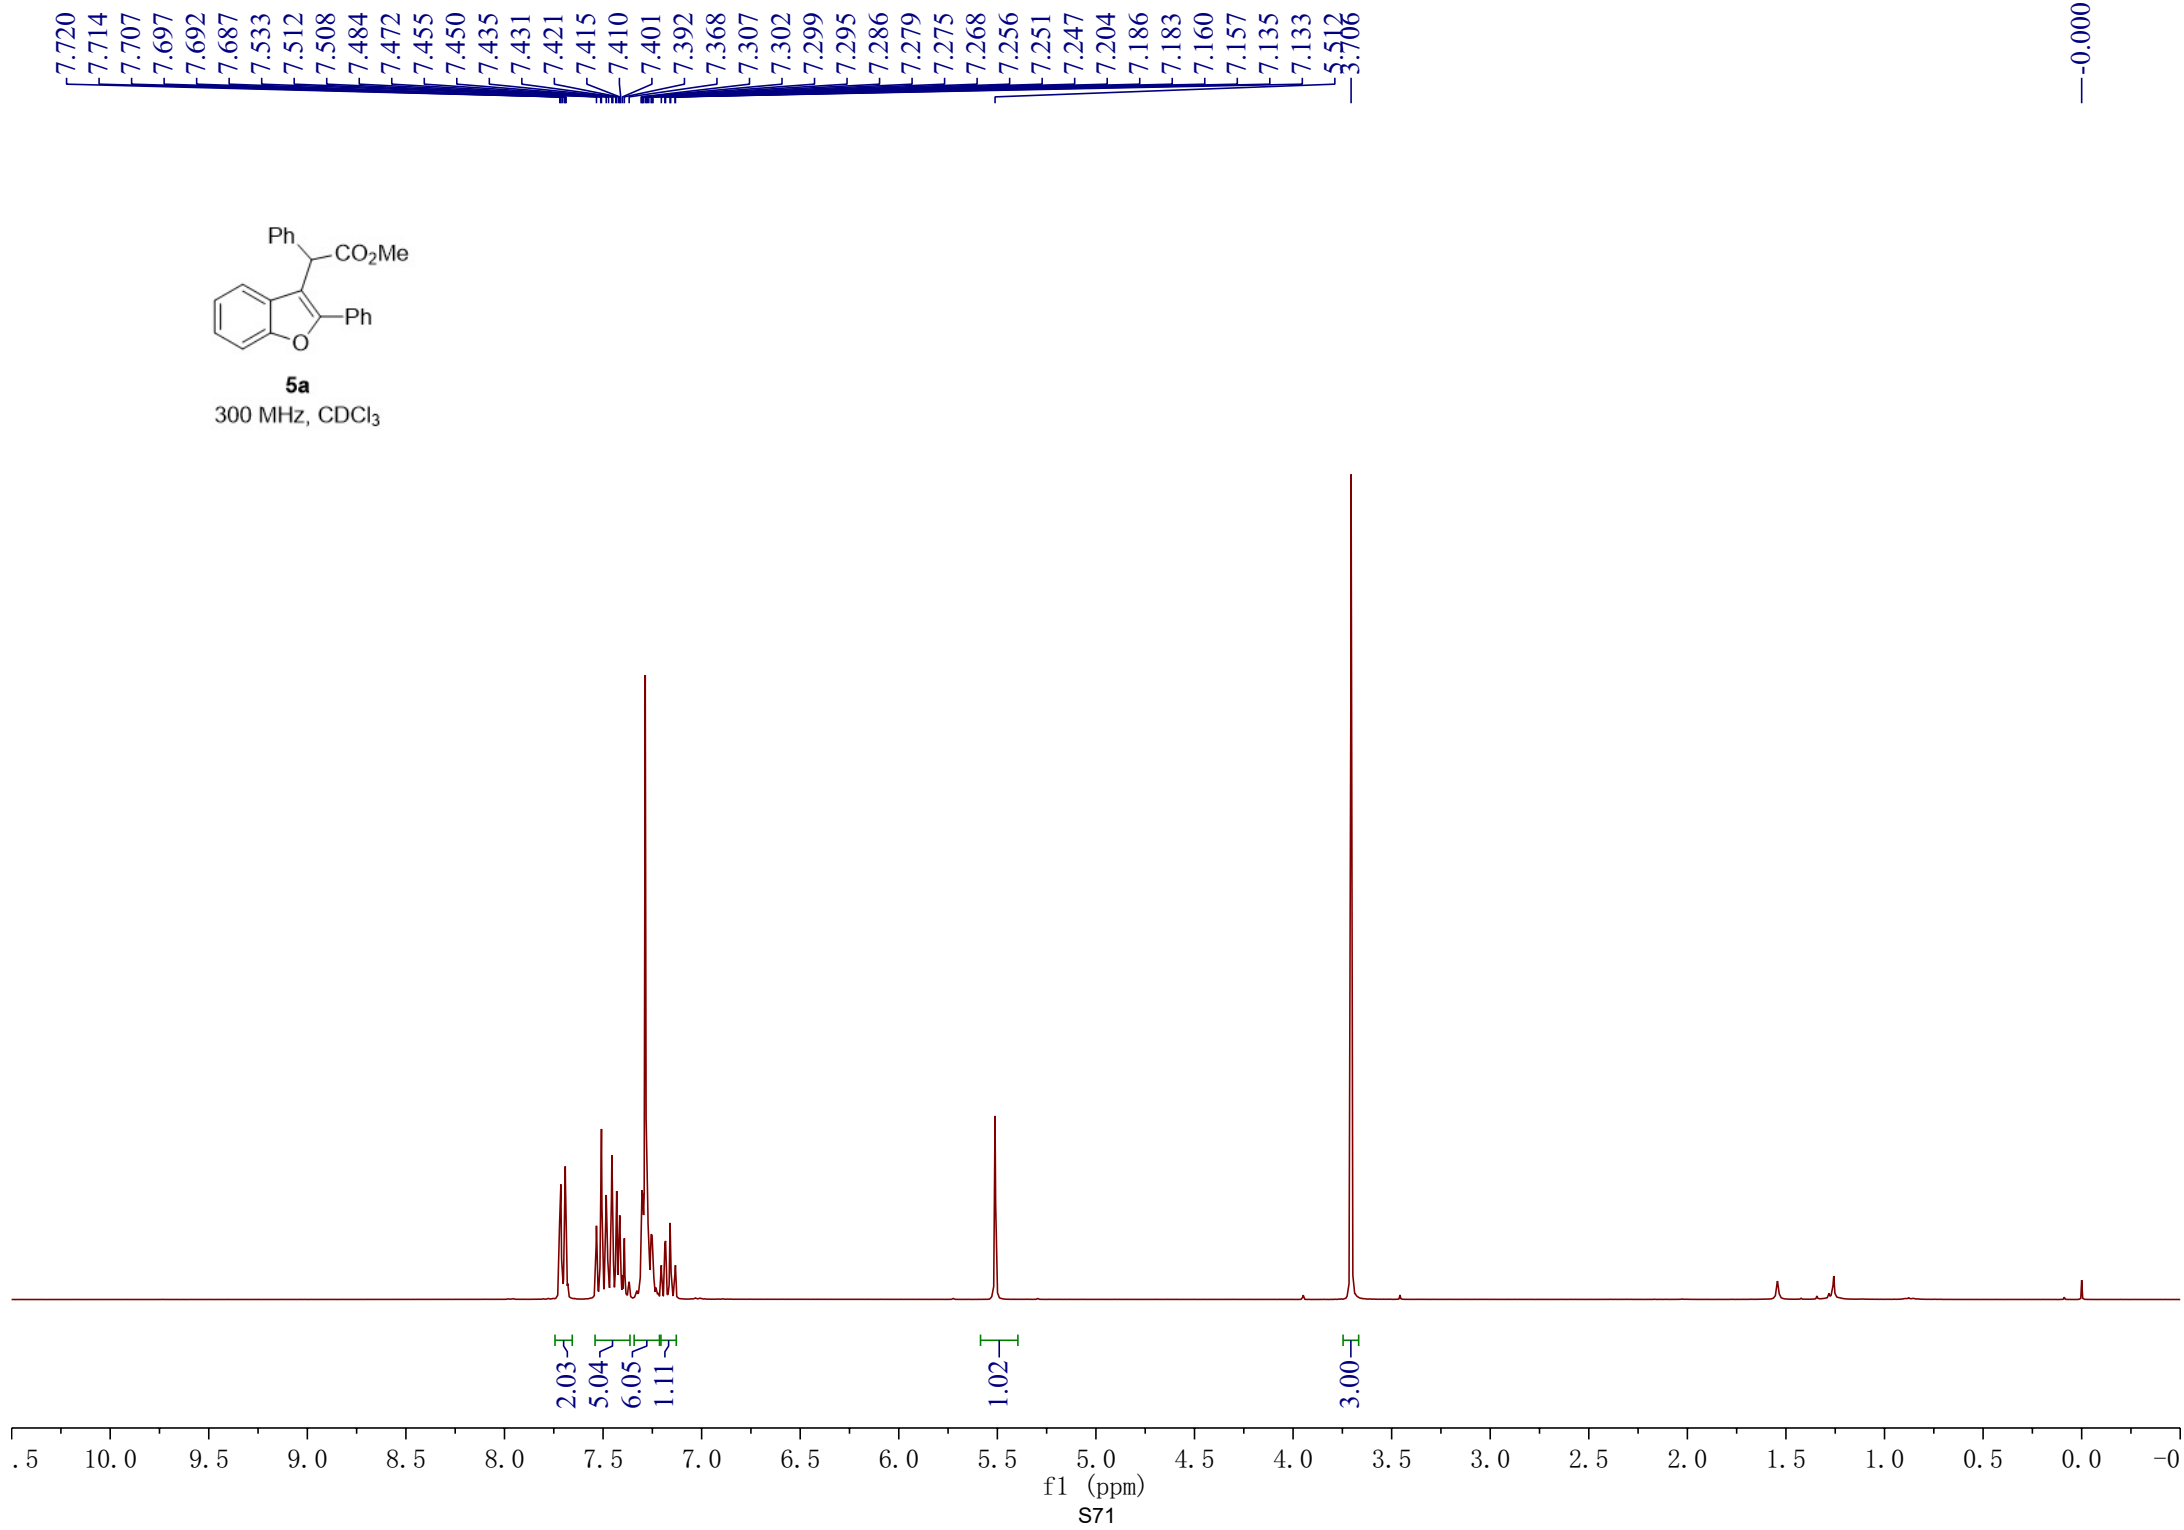

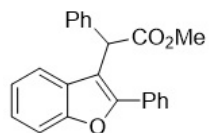

**5a**

75 MHz, CDCl<sub>3</sub>

— 172.526

— 154.430  
— 153.636

— 137.283  
— 130.256  
— 129.114  
— 128.862  
— 128.656  
— 128.596  
— 128.319  
— 128.054  
— 127.382  
— 124.570  
— 122.897  
— 121.981  
— 112.457  
— 111.288

— 52.494

— 47.831

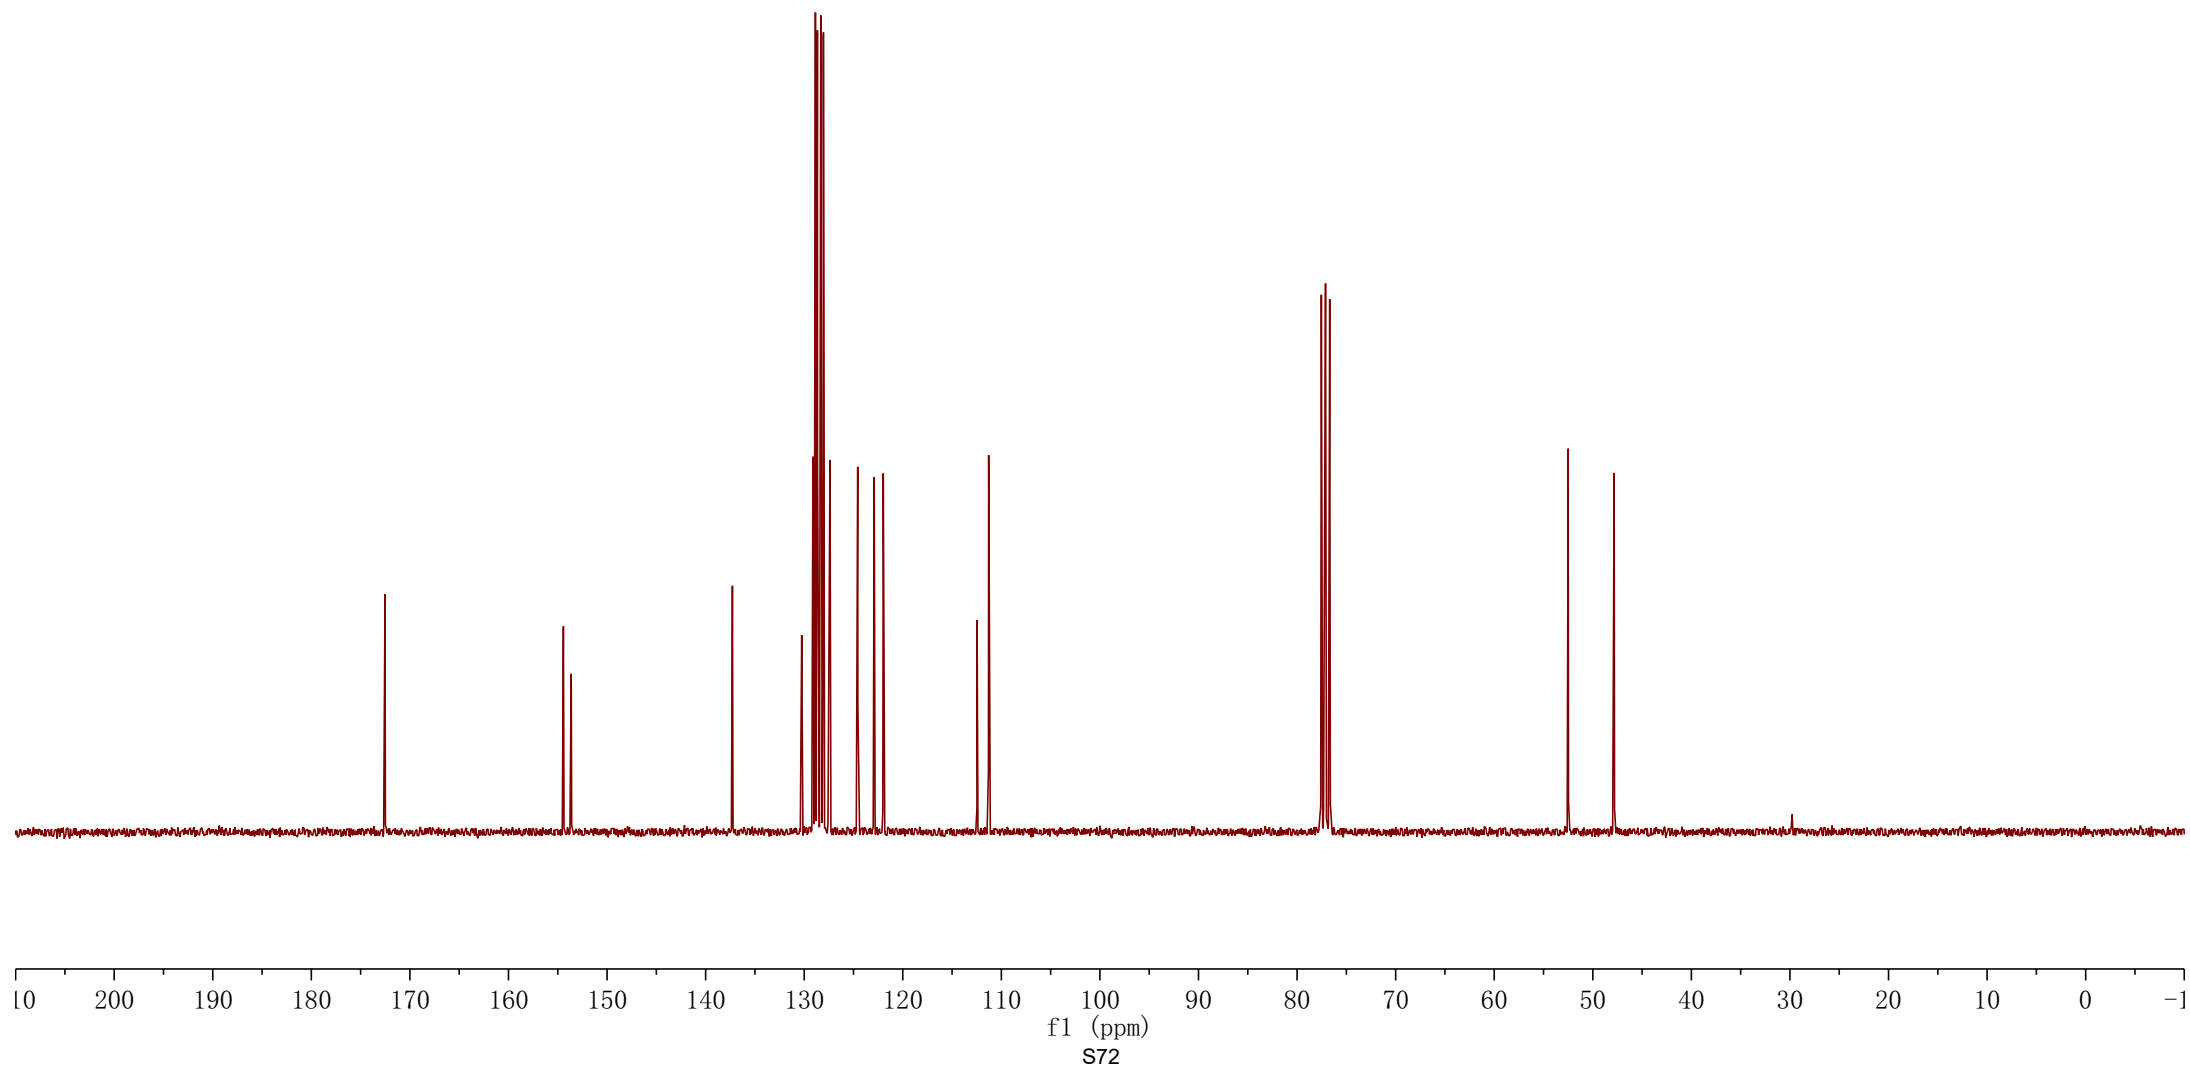

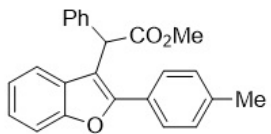

**5b**

400 MHz, CDCl<sub>3</sub>

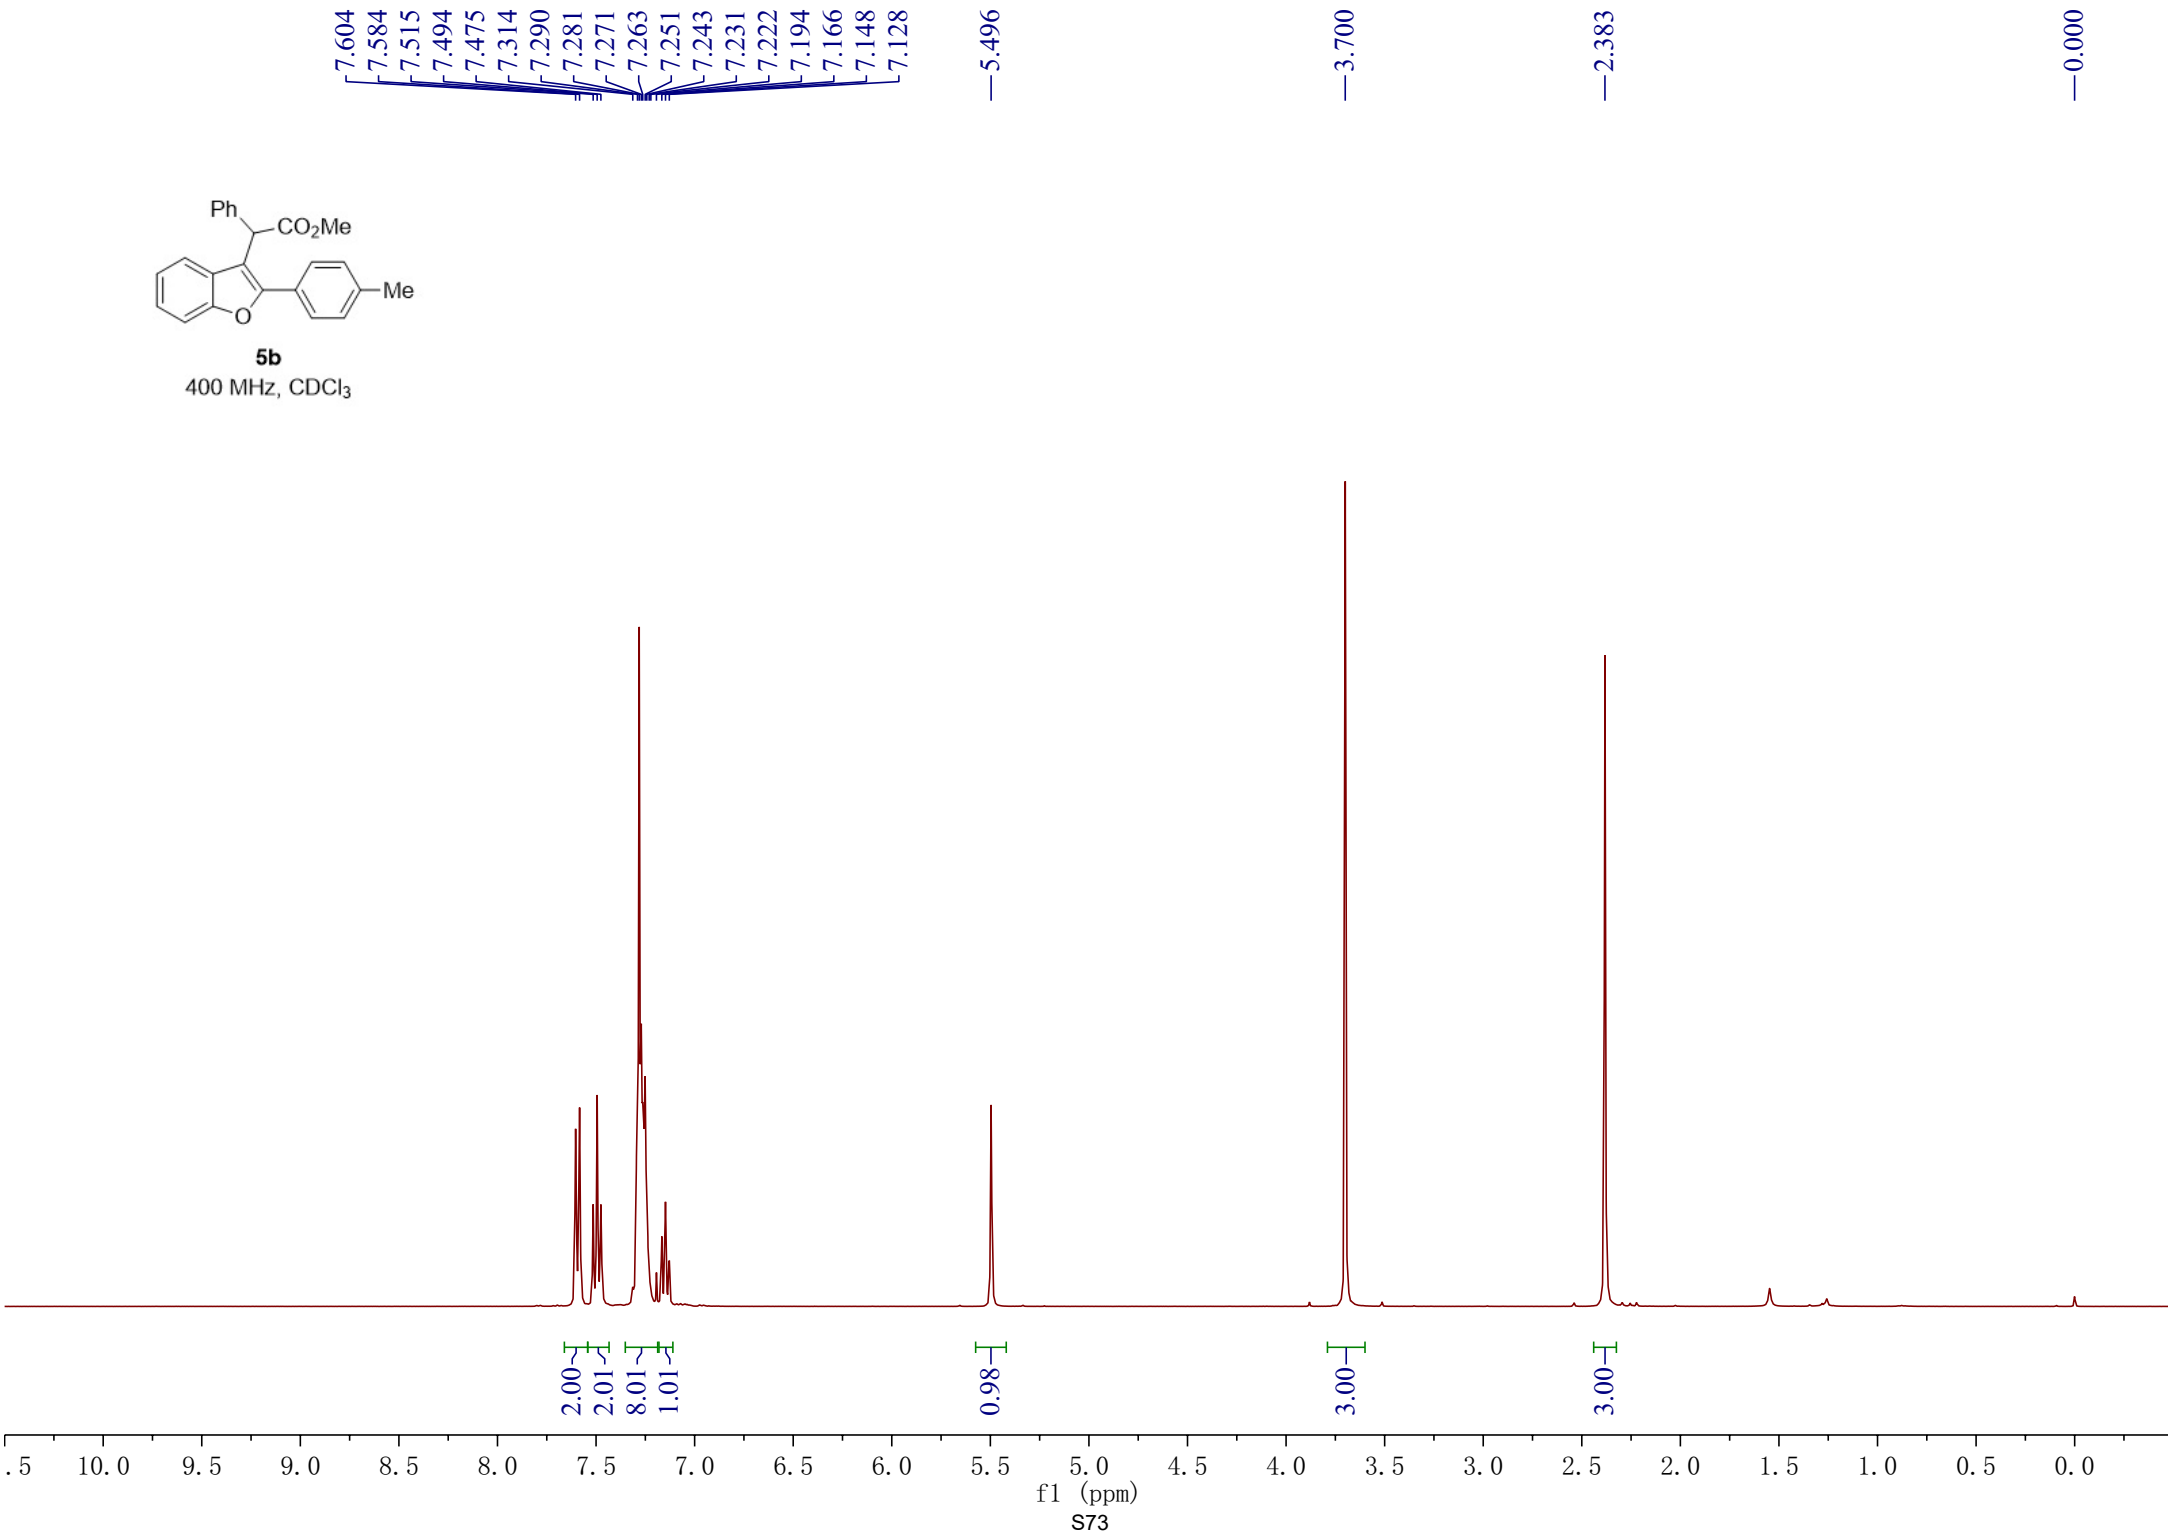

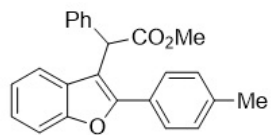

**5b**

100 MHz, CDCl<sub>3</sub>

—172.625

—154.361  
—153.901

—139.233  
—137.400  
—129.601  
—128.685  
—128.659  
—128.342  
—127.968  
—127.418  
—127.366  
—124.392  
—122.847  
—121.880  
—111.940  
—111.247

—52.501  
—47.875

—21.499

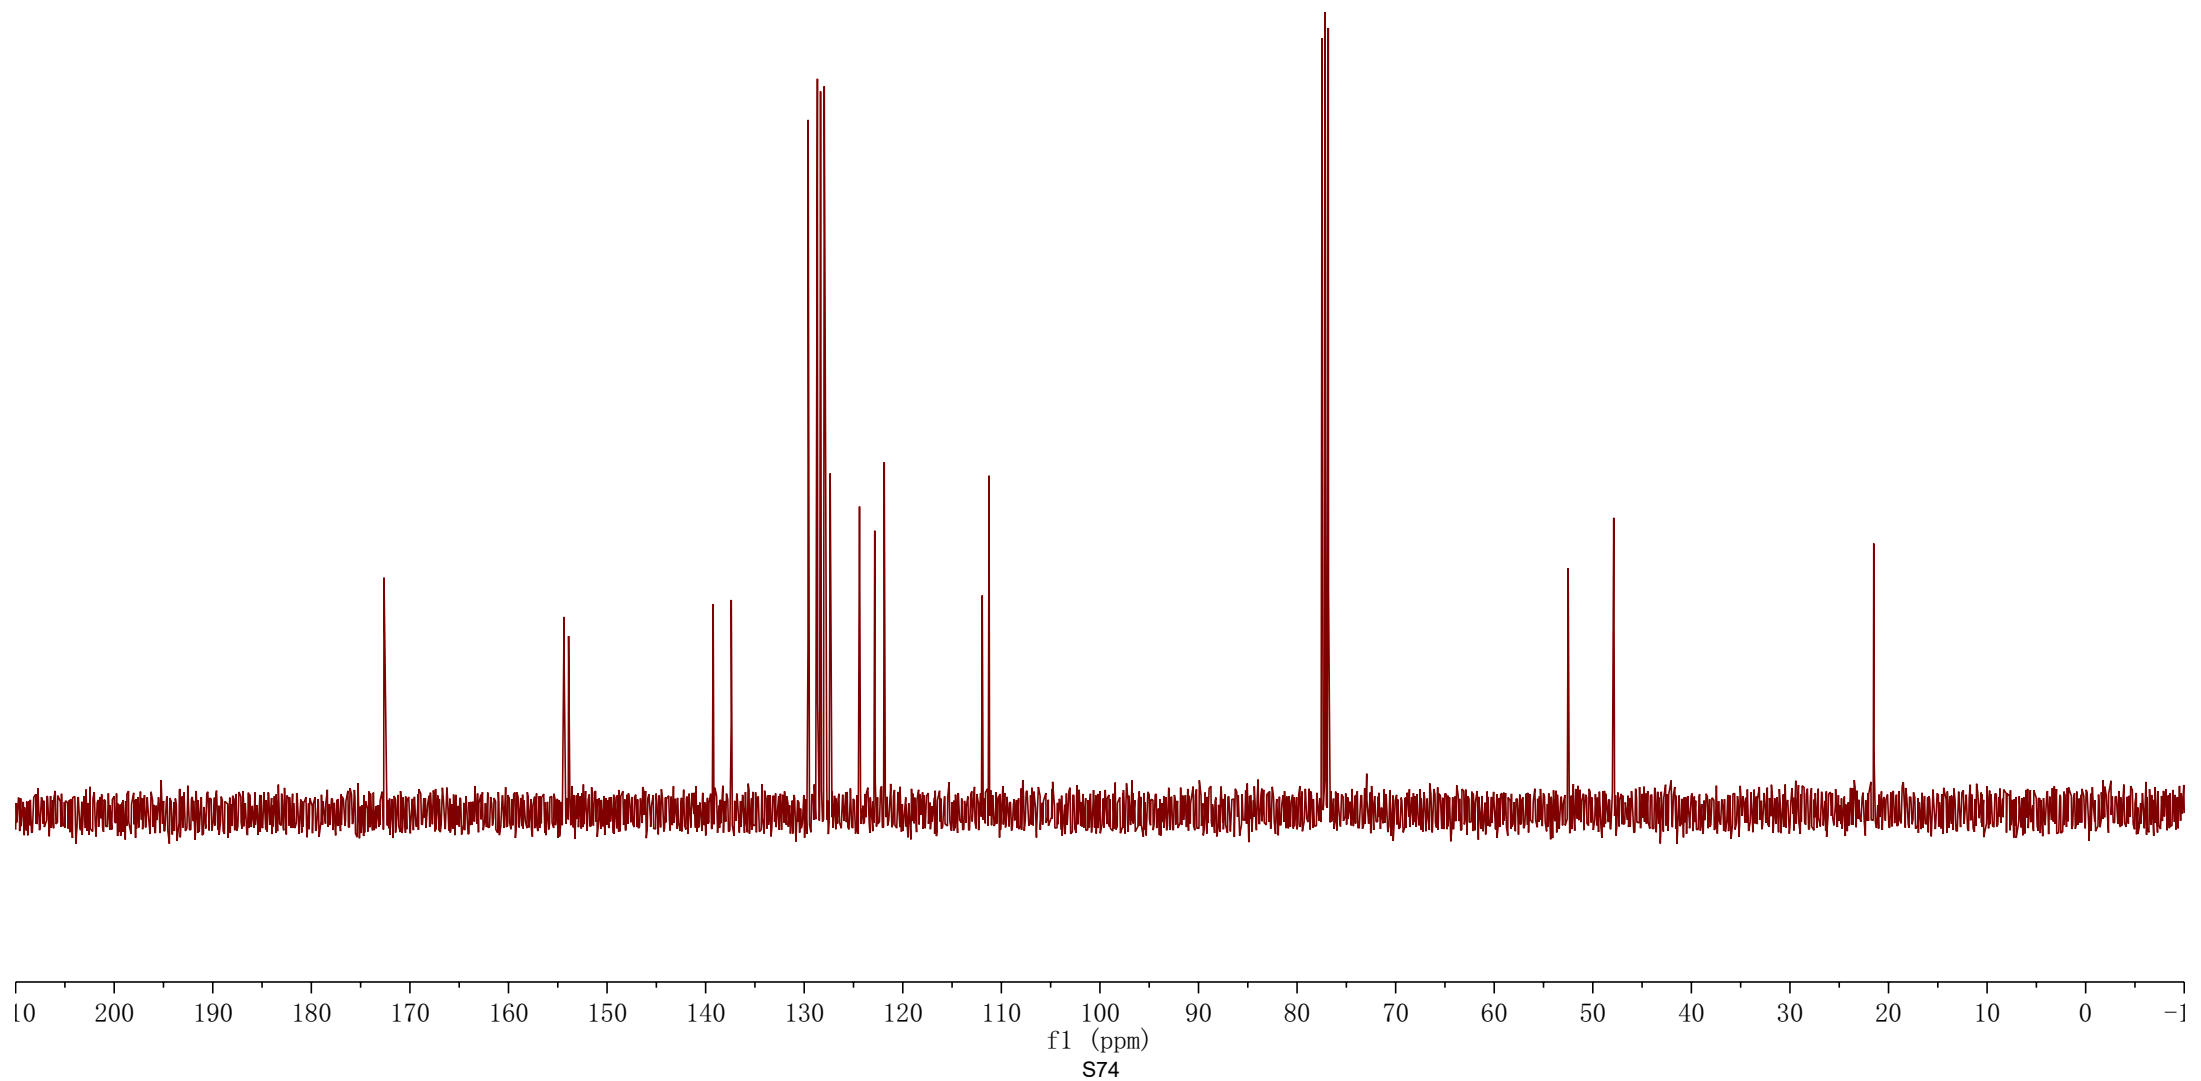

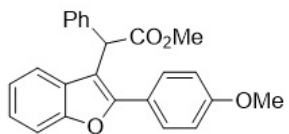

**5c**

400 MHz, CDCl<sub>3</sub>

7.642  
7.623  
7.502  
7.484  
7.482  
7.469  
7.419  
7.290  
7.281  
7.267  
7.261  
7.247  
7.226  
7.183  
7.181  
7.160  
7.141  
7.122  
6.978  
6.959  
— 5.470

~ 3.793  
~ 3.694

— 0.000

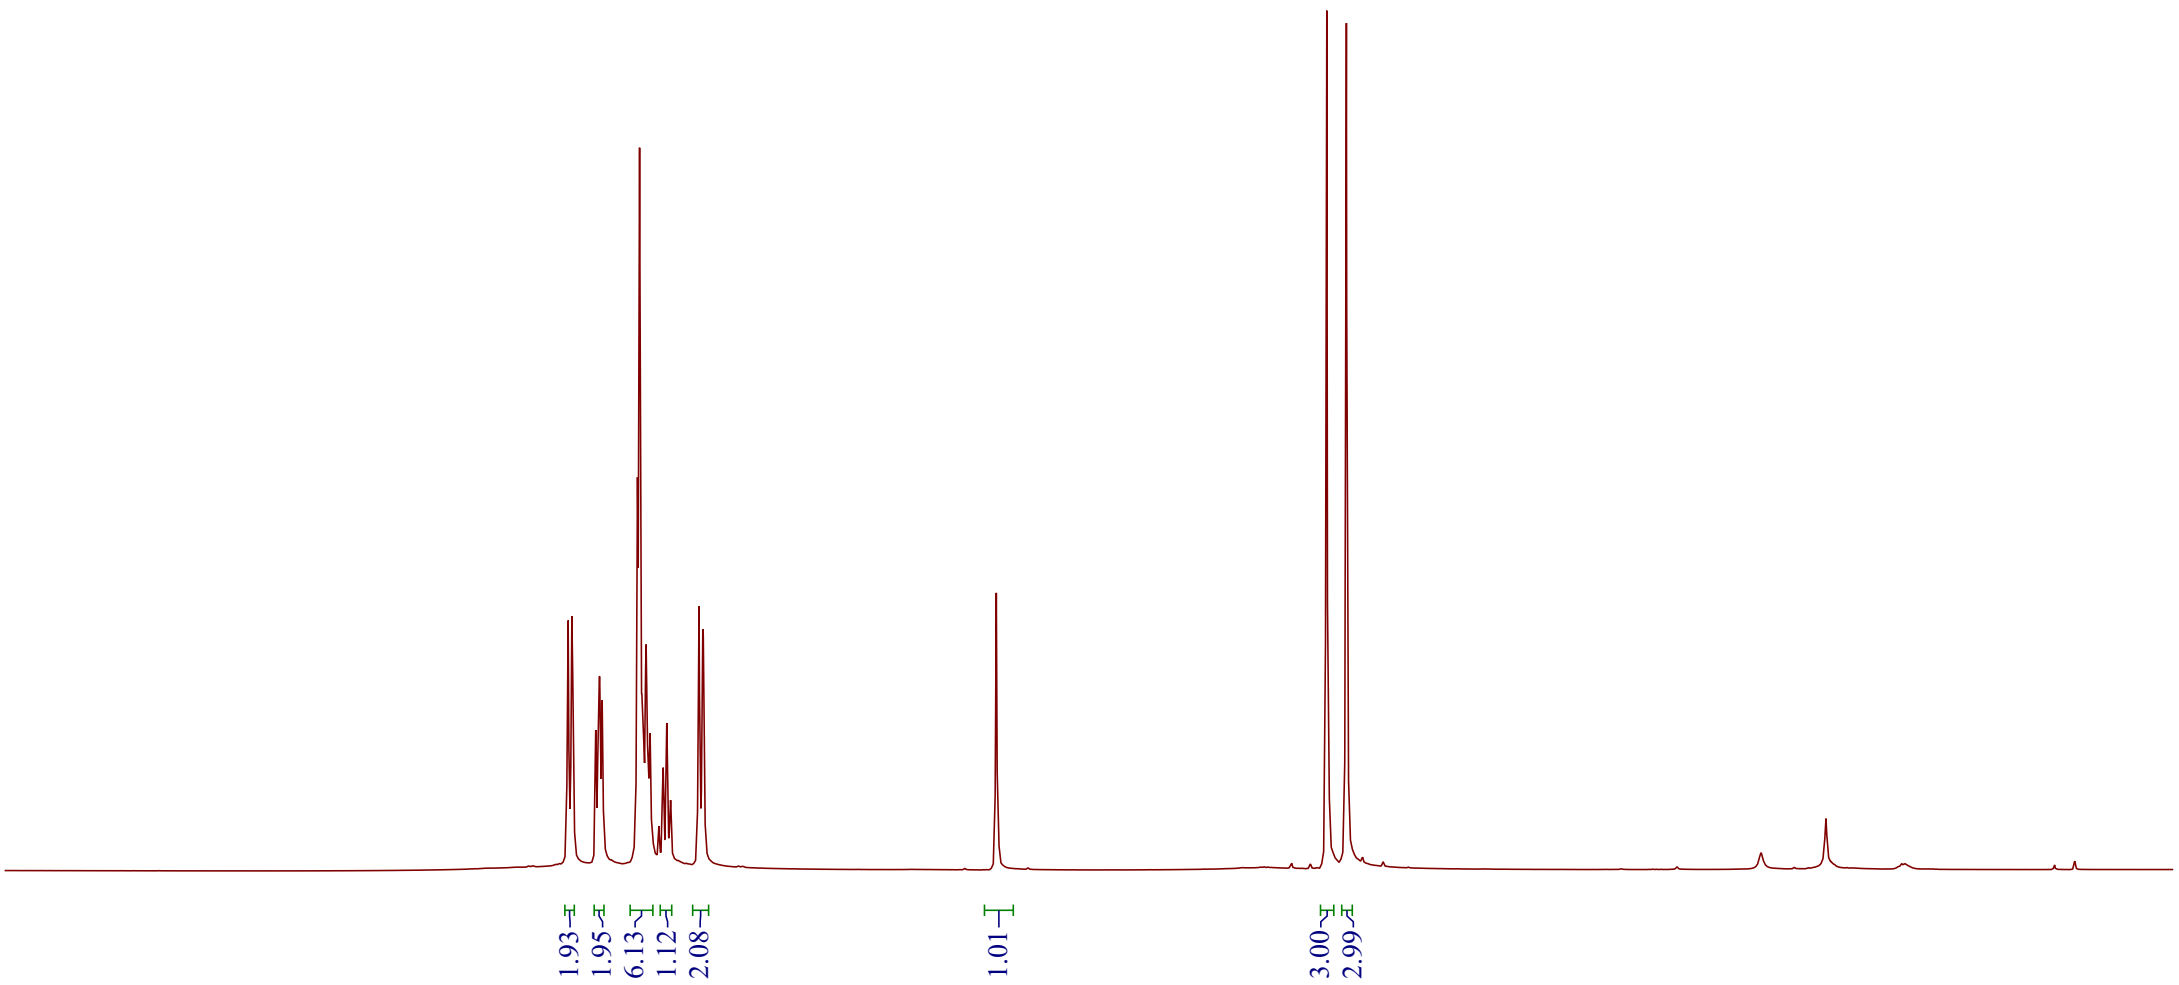

1.93  
1.95  
6.13  
1.12  
2.08

1.01

3.00  
2.99

.5 10.0 9.5 9.0 8.5 8.0 7.5 7.0 6.5 6.0 5.5 5.0 4.5 4.0 3.5 3.0 2.5 2.0 1.5 1.0 0.5 0.0 -0  
f1 (ppm)  
S75

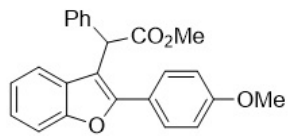

**5c**

100 MHz, CDCl<sub>3</sub>

— 172.619

— 160.305

— 154.257

— 153.793

— 137.398

— 129.490

— 128.732

— 128.650

— 128.333

— 127.357

— 124.227

— 122.817

— 122.749

— 121.718

— 114.343

— 111.309

— 111.162

— 55.400

— 52.485

— 47.896

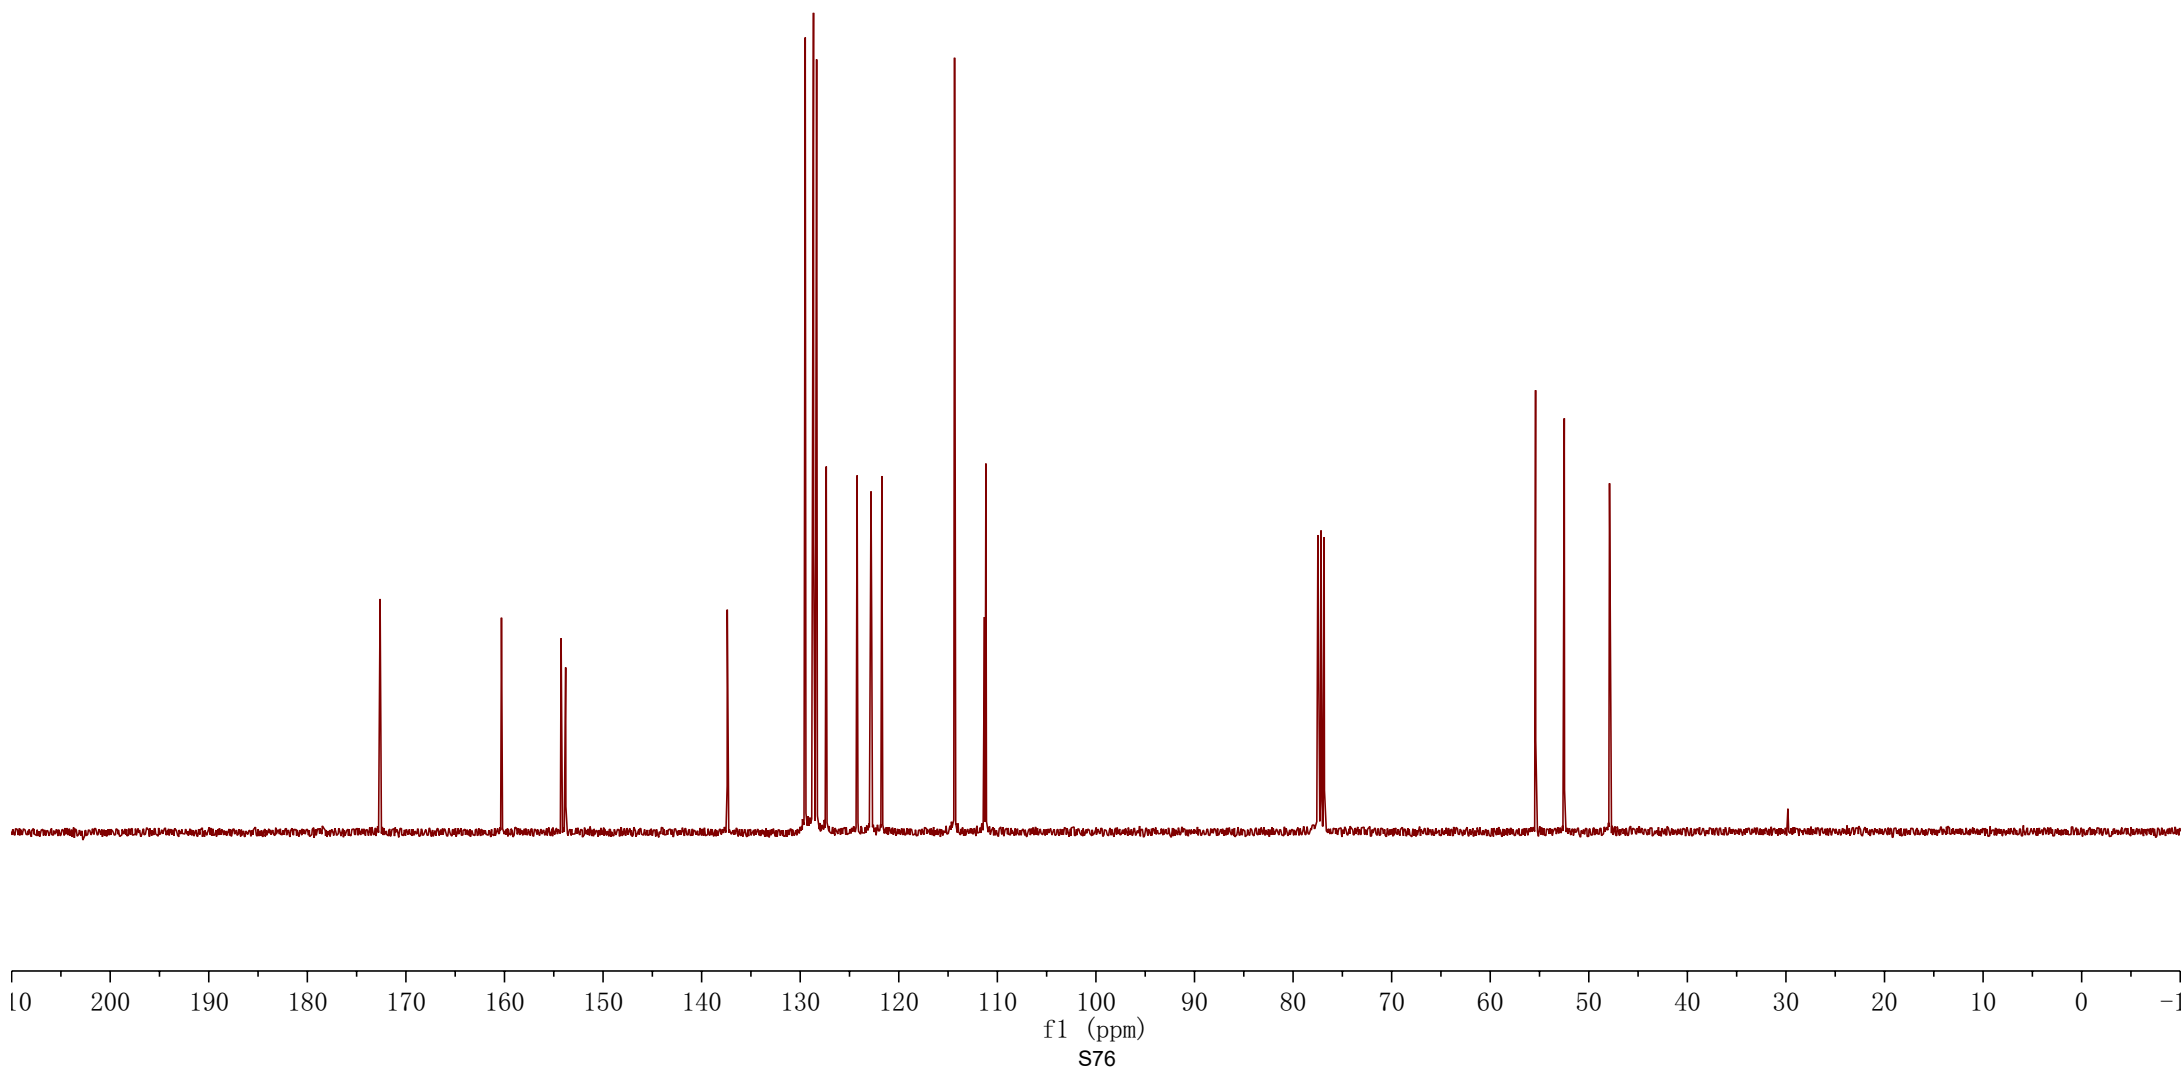

8.161  
8.157  
7.932  
7.904  
7.871  
7.862  
7.850  
7.846  
7.841  
7.830  
7.818  
7.812  
7.574  
7.554  
7.550  
7.547  
7.528  
7.526  
7.516  
7.505  
7.495  
7.484  
7.476  
7.473  
7.356  
7.338  
7.329  
7.321  
7.309  
7.305  
7.296  
7.285  
7.282  
7.277  
7.272  
7.267  
7.254  
7.251  
7.215  
7.212  
7.202  
7.189  
7.186  
7.164  
7.161  
5.609  
3.716

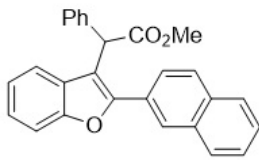

**5d**  
300 MHz, CDCl<sub>3</sub>

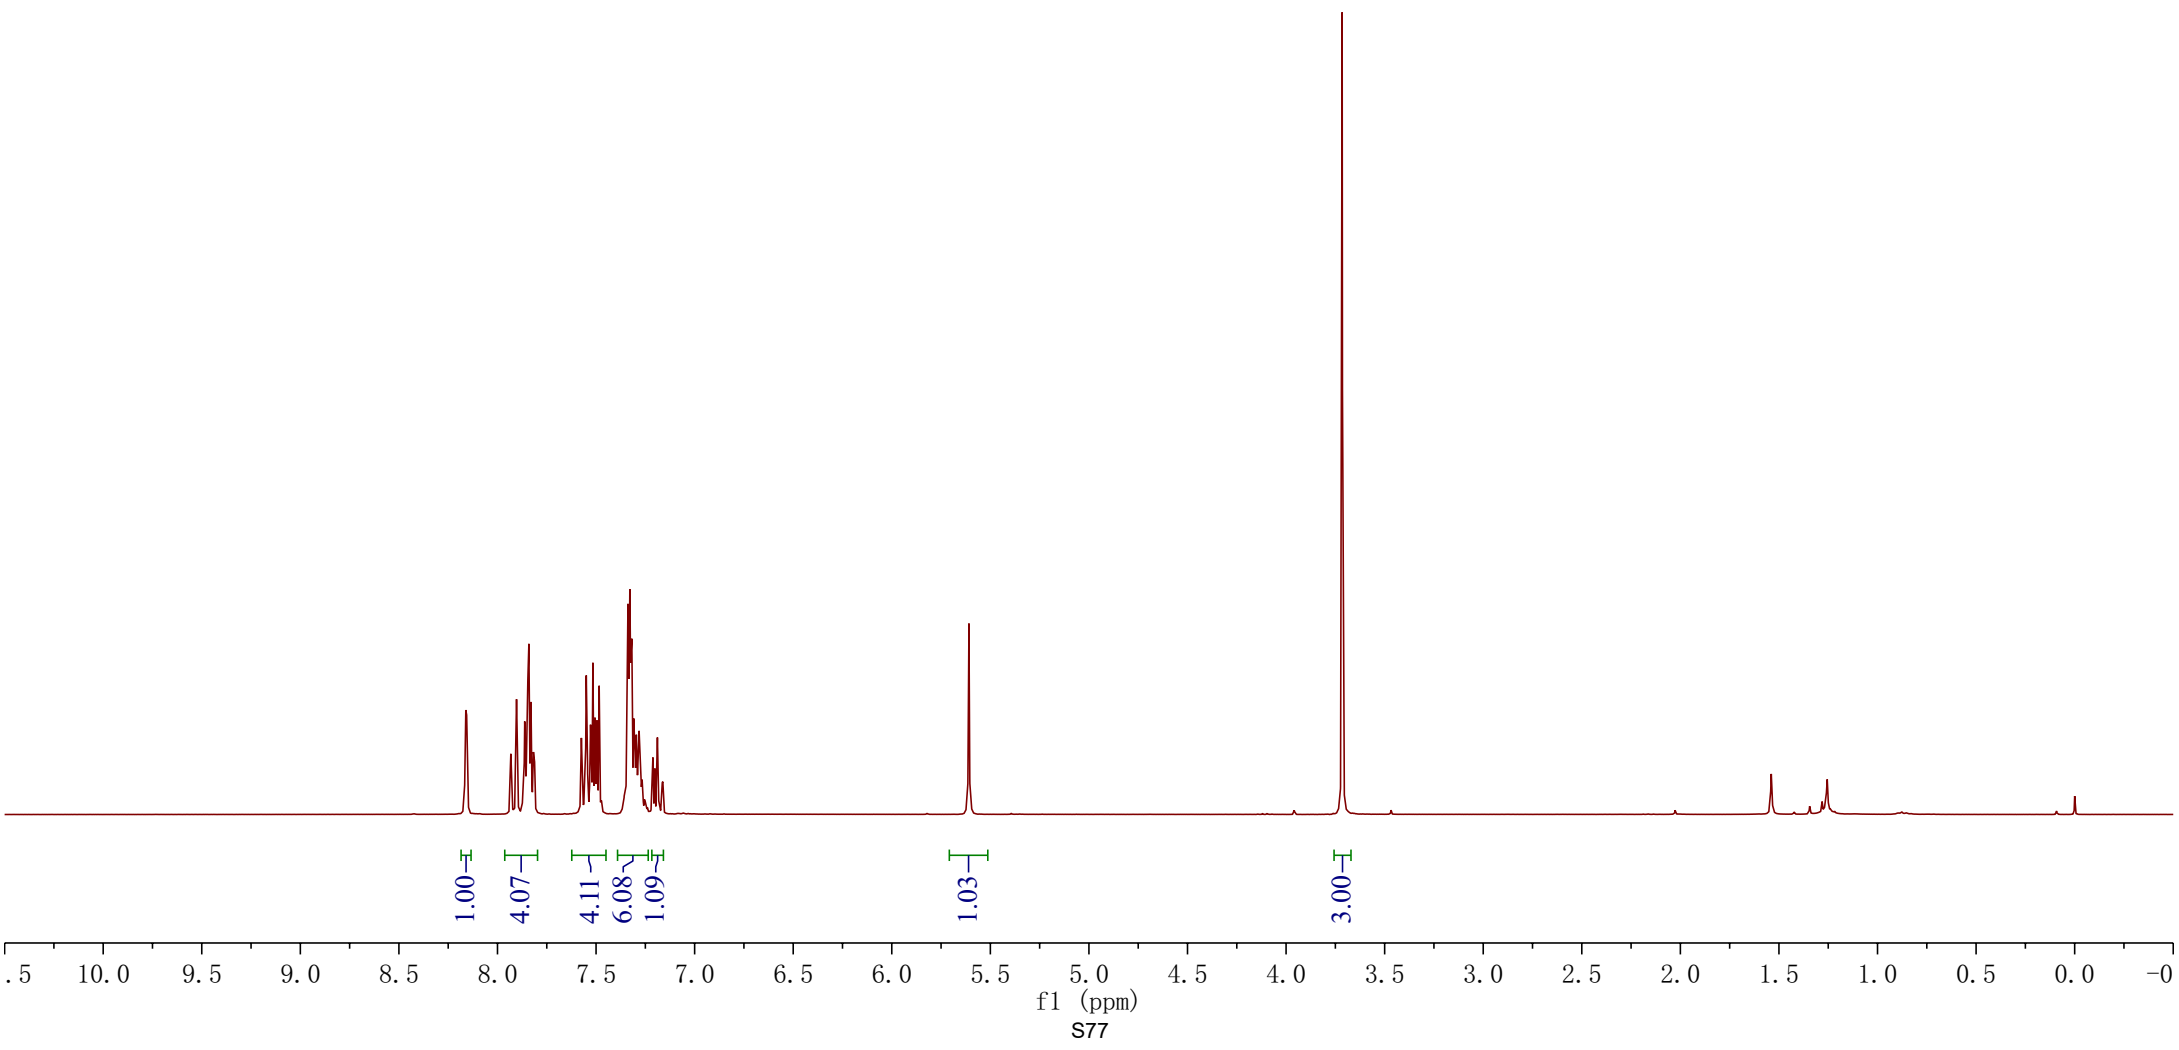

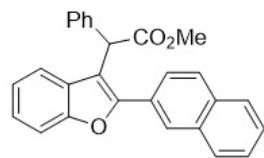

**5d**  
75 MHz, CDCl<sub>3</sub>

—172.539

154.570  
153.664  
137.408  
133.341  
133.177  
128.628  
128.542  
128.405  
127.836  
127.679  
127.595  
127.457  
126.982  
126.724  
125.201  
124.666  
122.984  
121.952  
112.966  
111.337

—52.532

—48.023

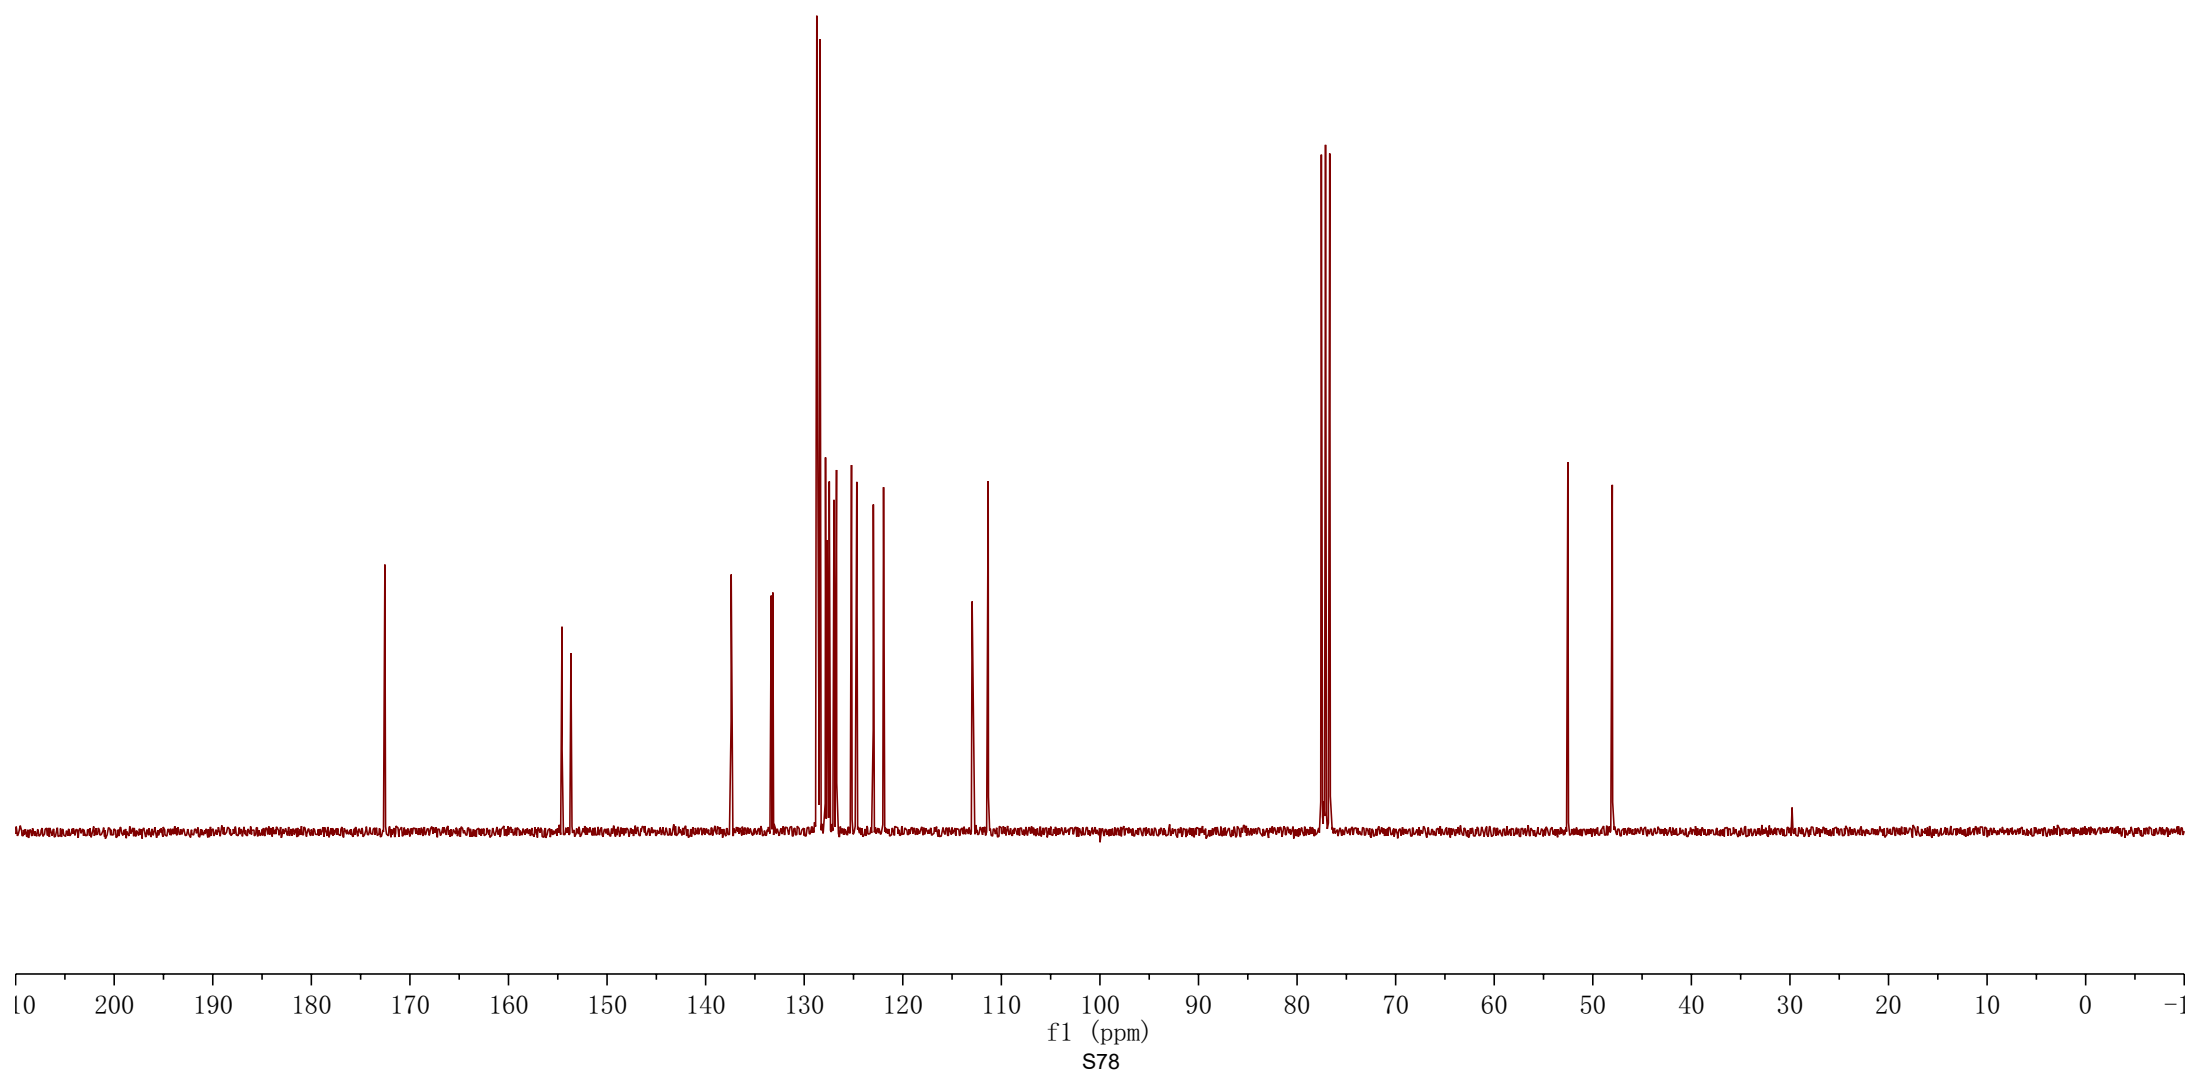



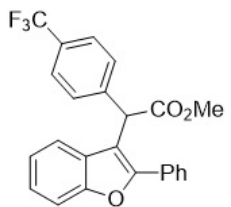

**5e**  
400 MHz, CDCl<sub>3</sub>

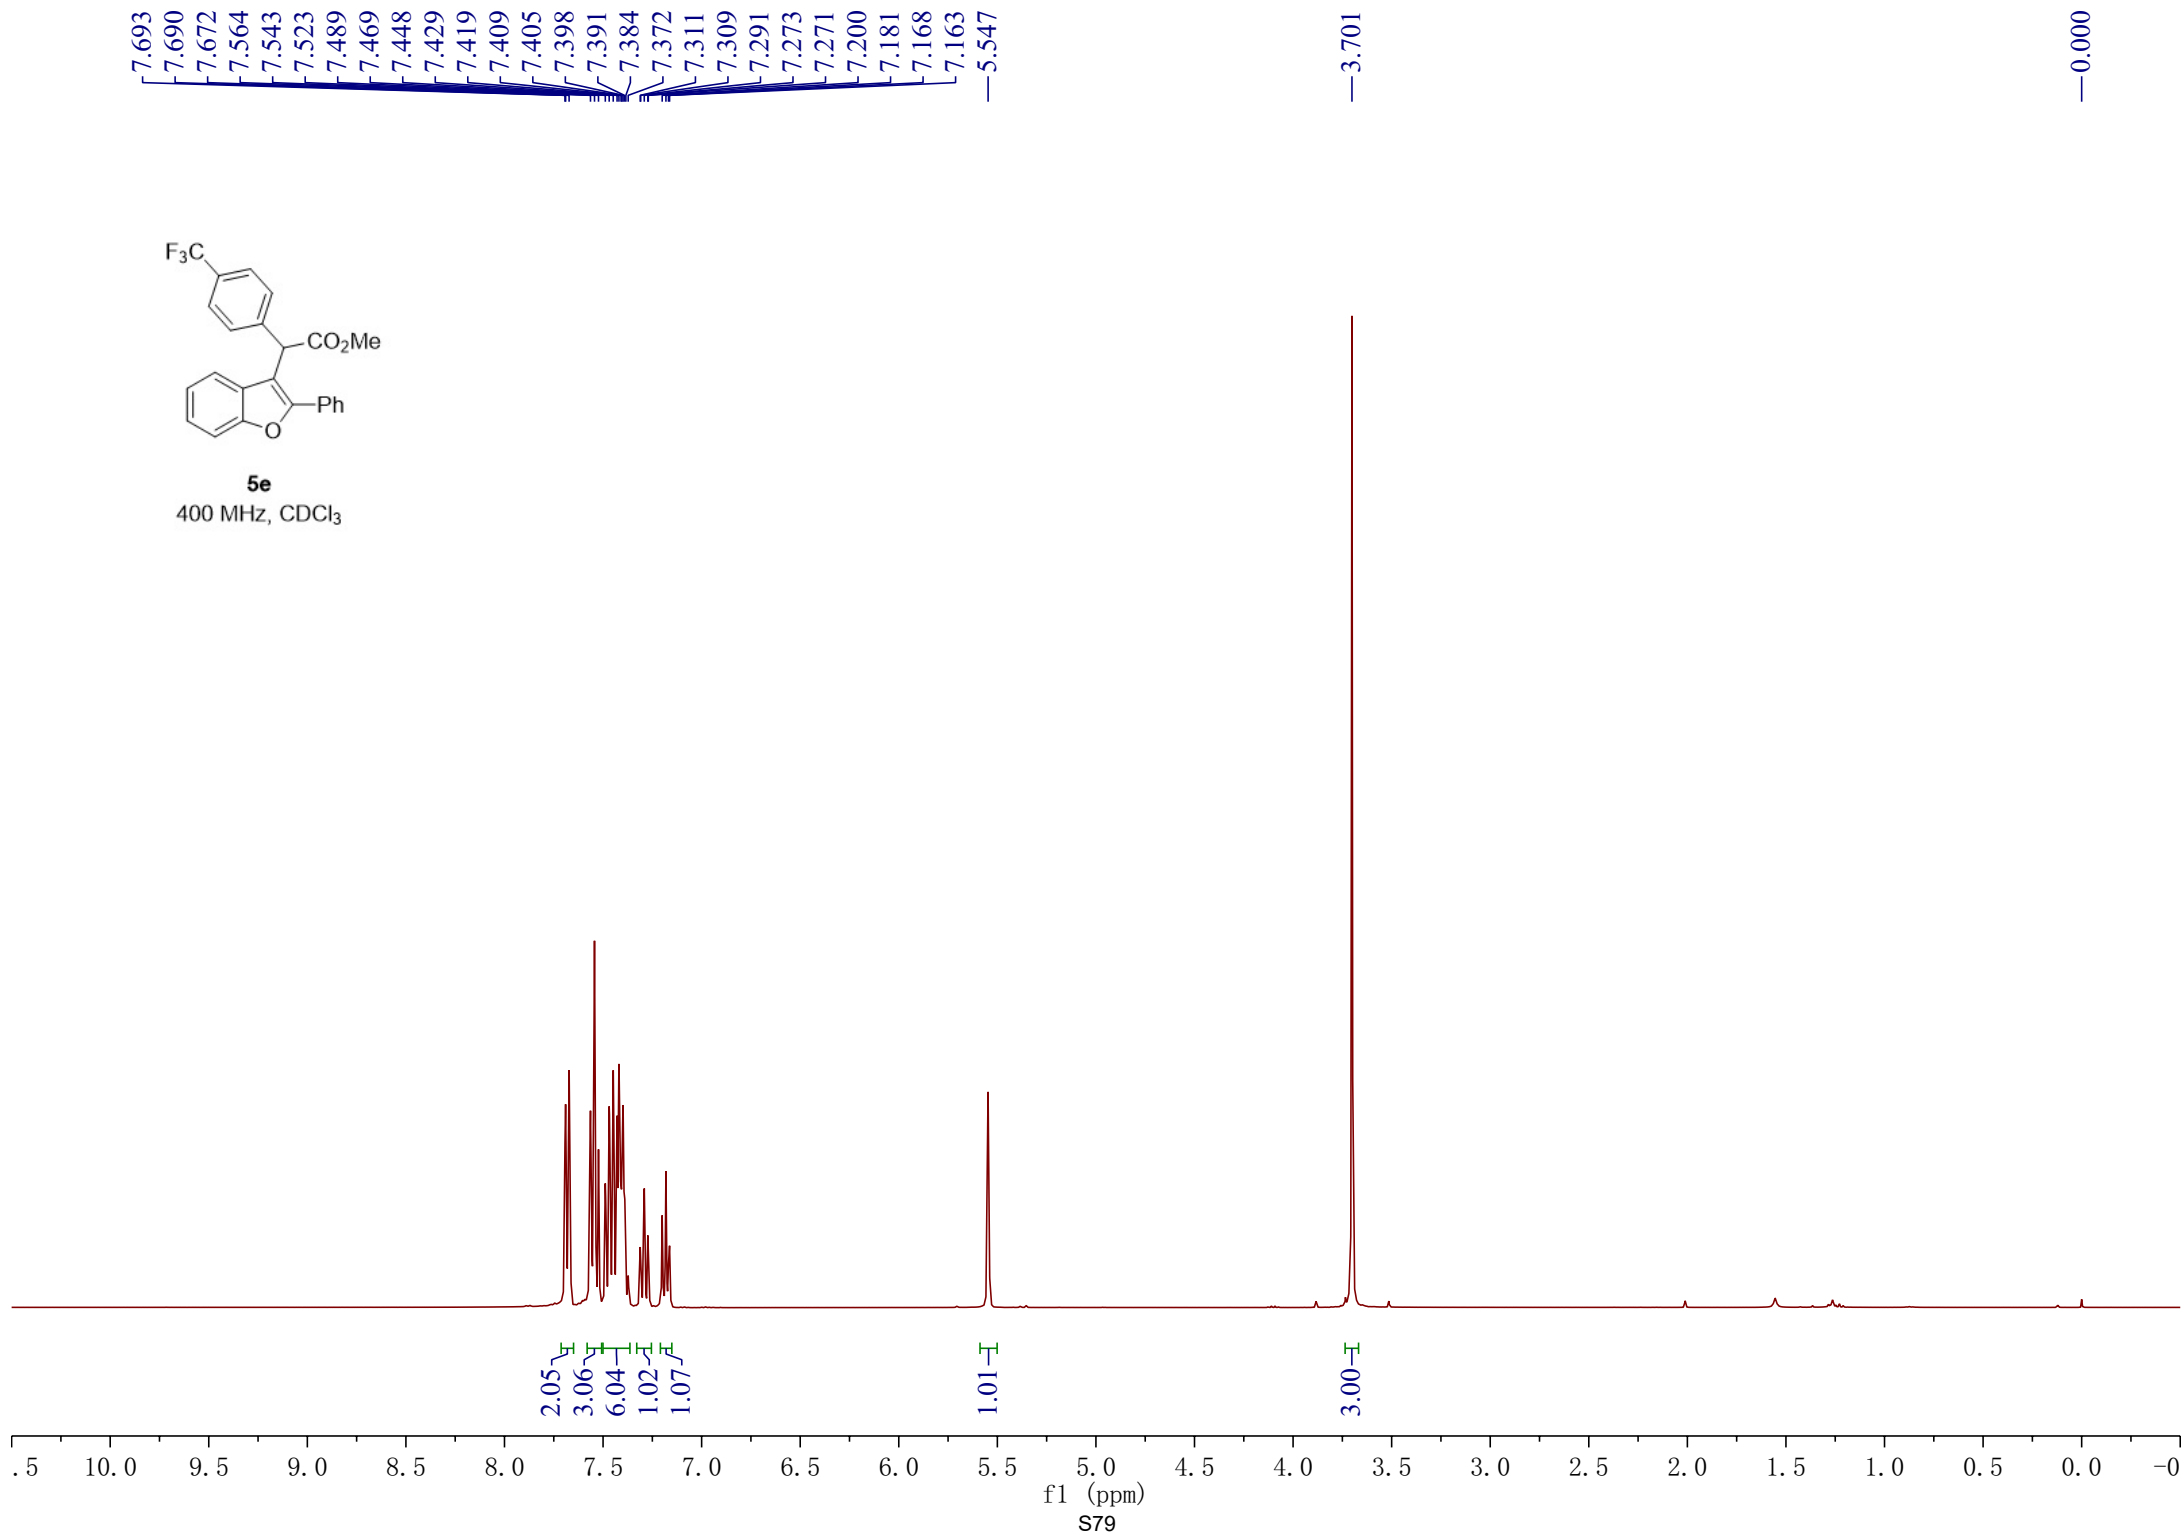

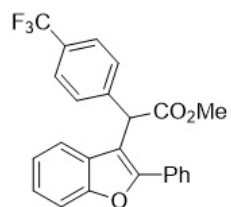

**5e**

100 MHz, CDCl<sub>3</sub>

—171.885

—154.478  
—154.024

—141.300

—130.167

—130.015

—129.844

—129.521

—129.363

—129.199

—128.973

—128.873

—128.254

—128.227

—128.044

—125.676

—125.640

—125.602

—125.565

—125.522

—124.865

—123.172

—122.817

—121.552

—120.113

—111.605

—111.500

—52.703

—47.608

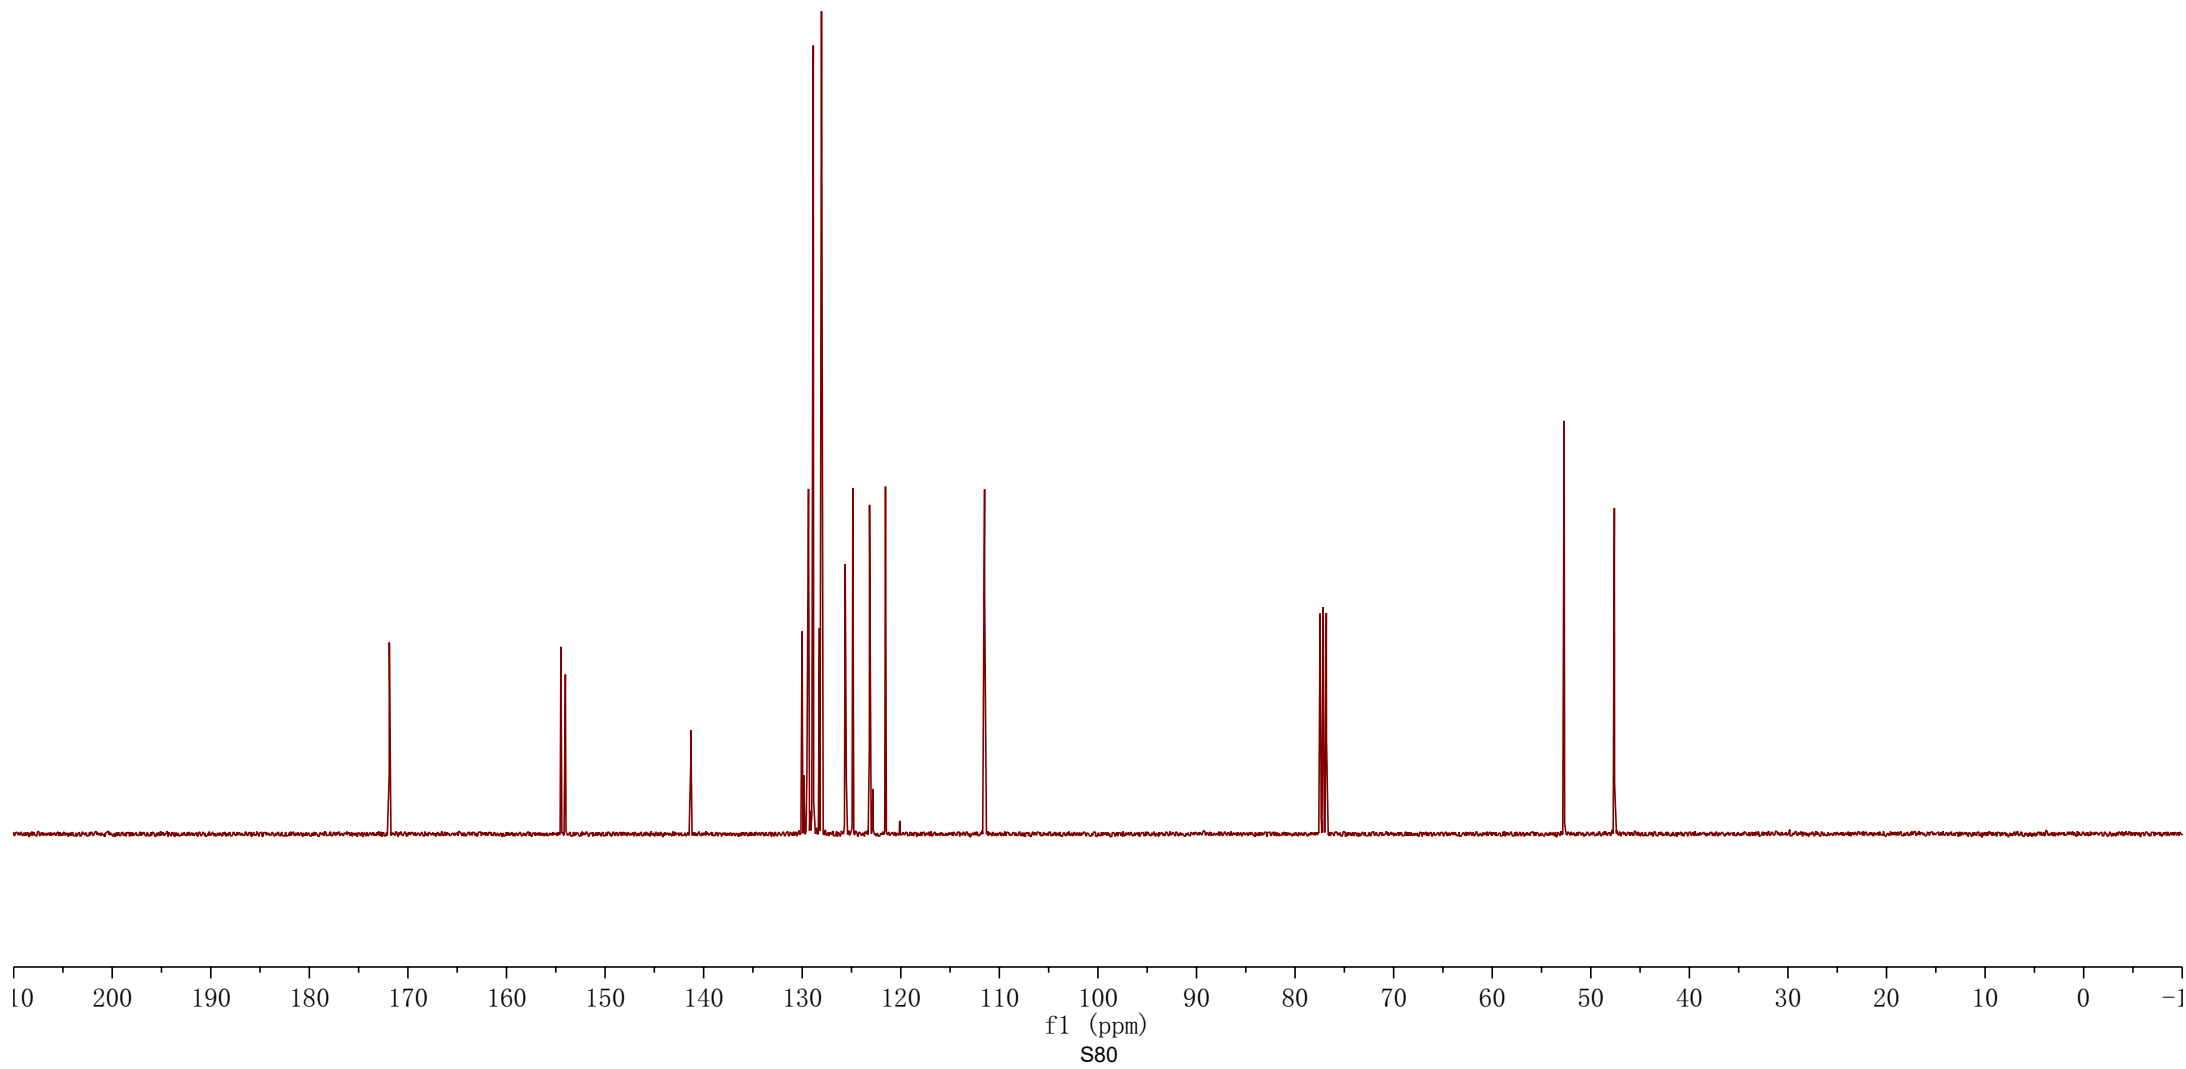

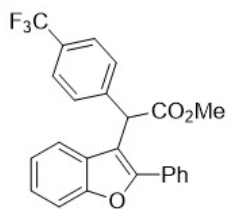

**5e**

471 MHz, CDCl<sub>3</sub>

— -62.411

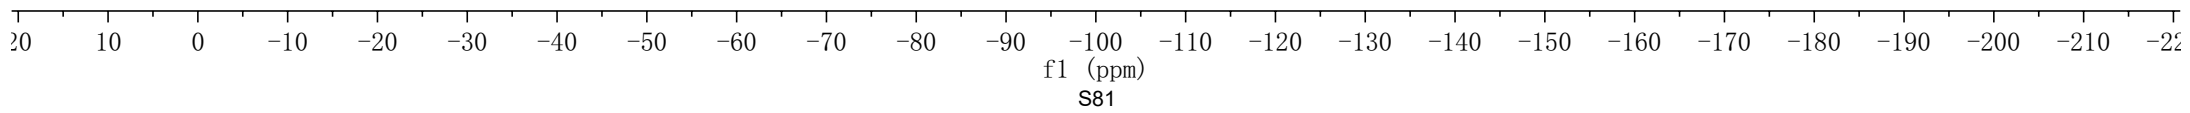

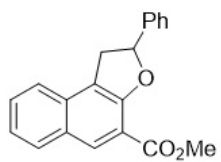

400 MHz, CDCl<sub>3</sub>

6

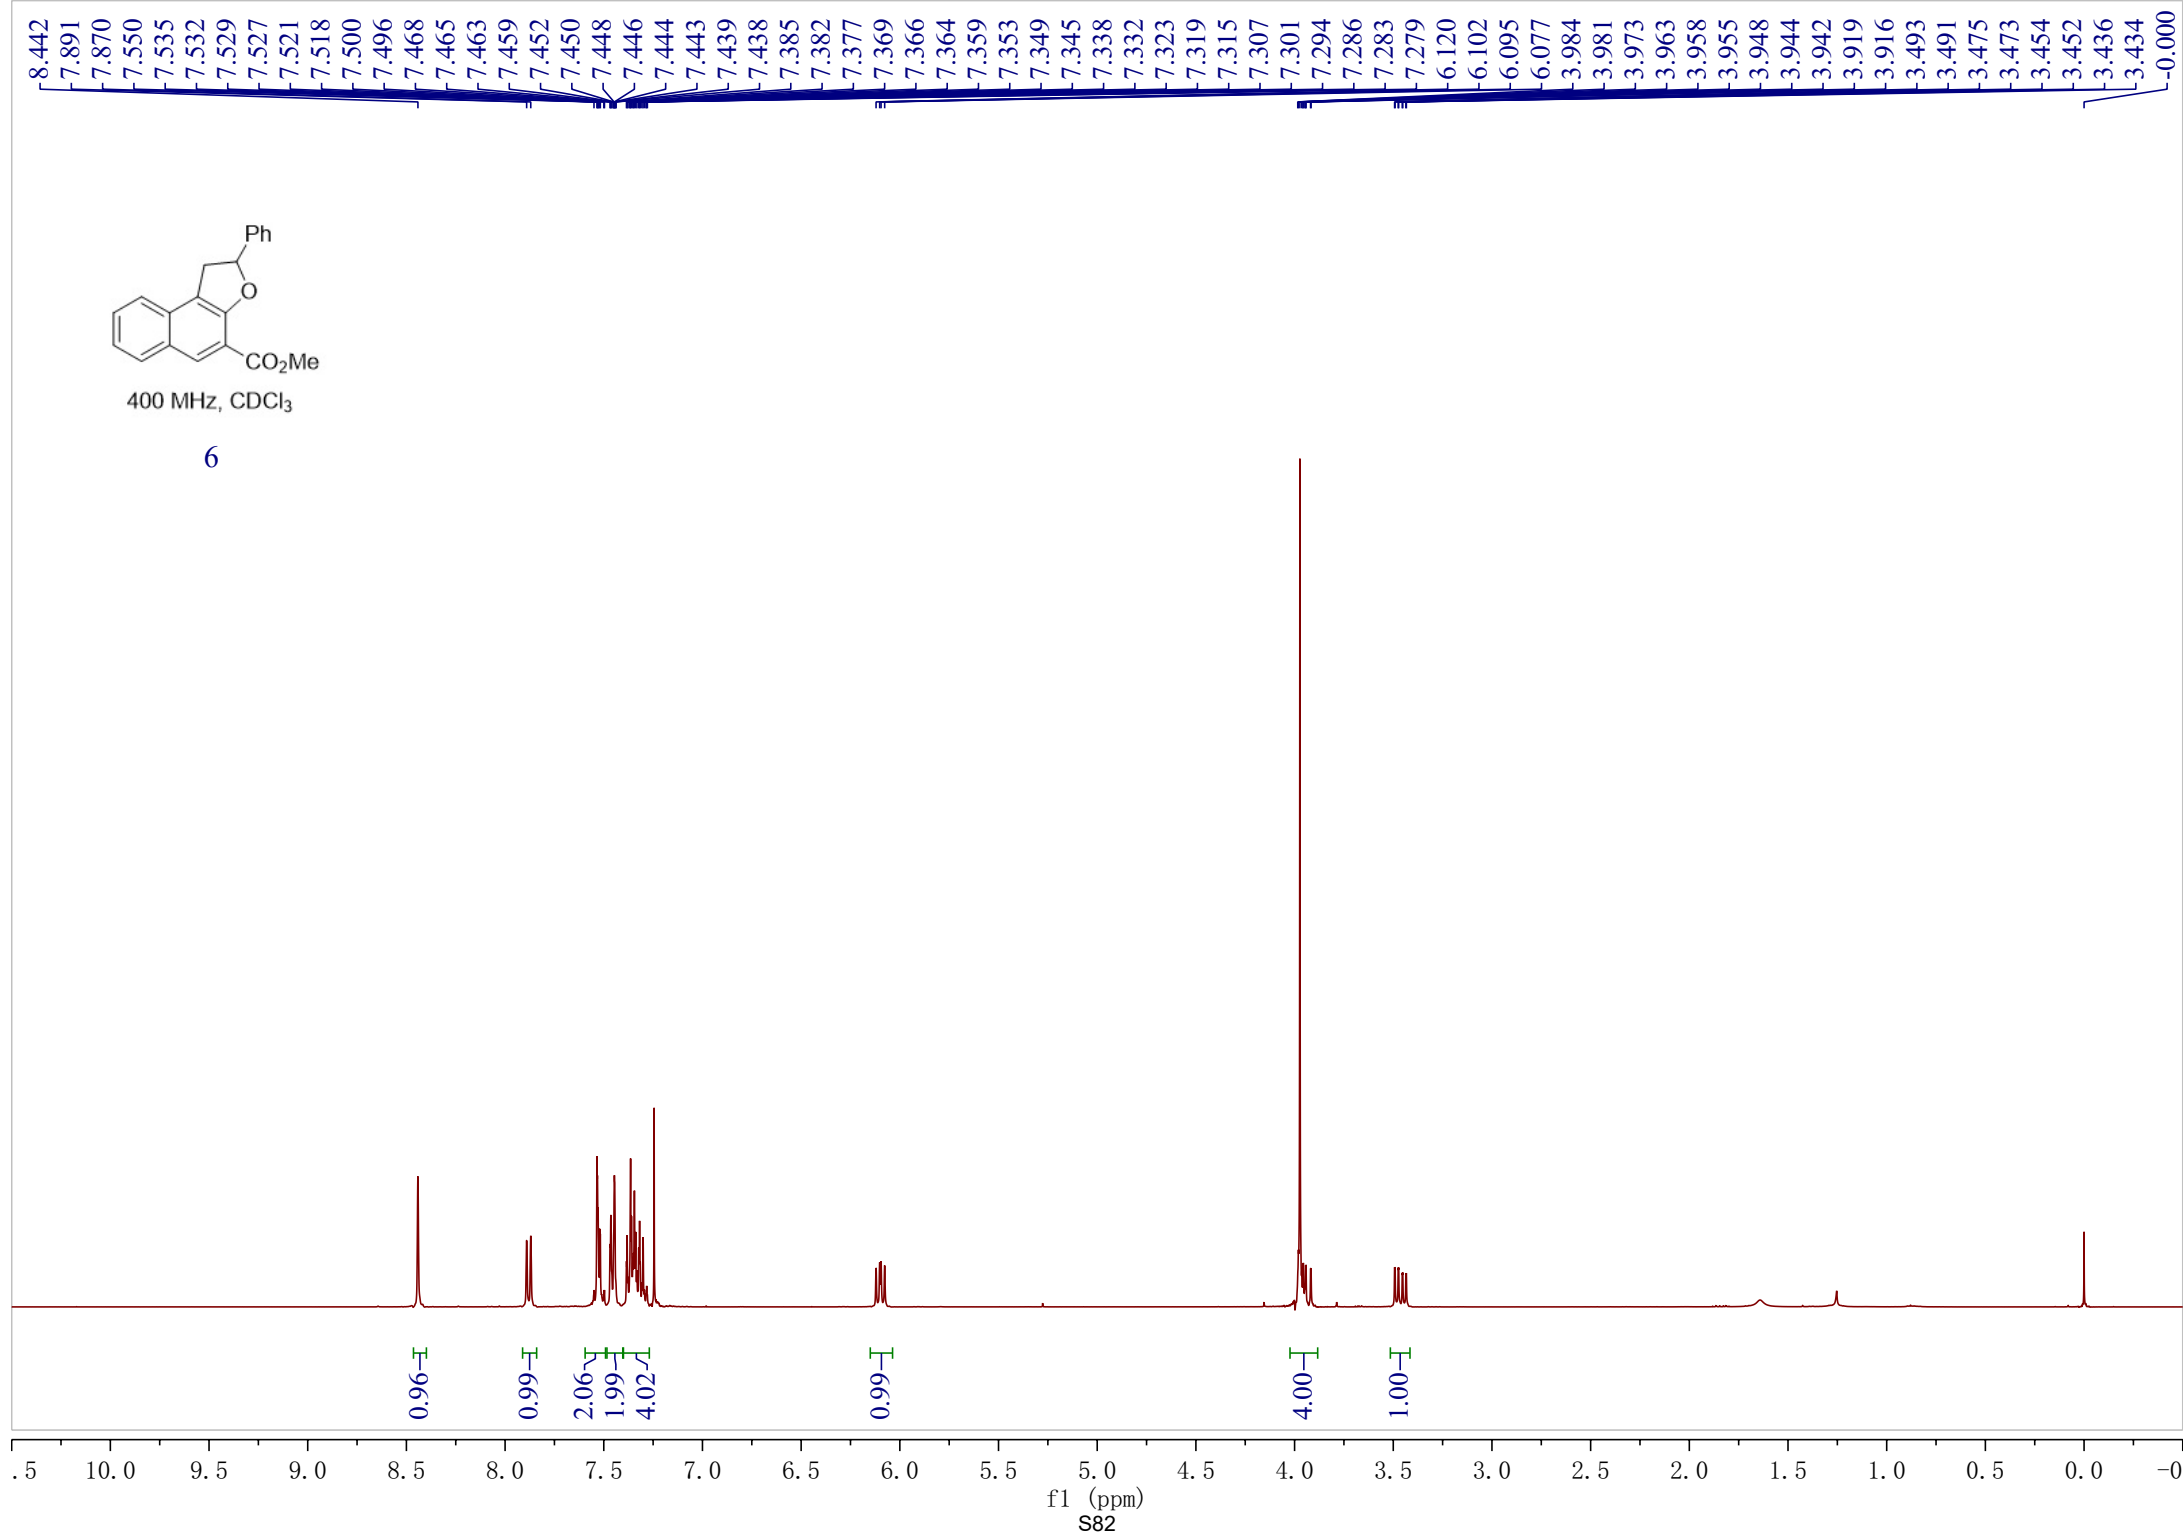

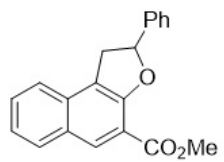

100 MHz, CDCl<sub>3</sub>

6

— 165.858  
— 155.776  
— 142.151  
— 132.794  
— 132.718  
— 130.014  
— 128.992  
— 128.699  
— 128.458  
— 128.050  
— 125.706  
— 123.843  
— 122.750  
— 120.413  
— 115.141

— 85.118

— 52.289

— 36.986

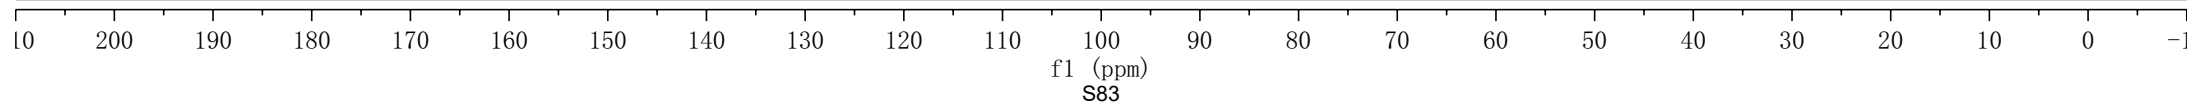

7.942  
7.922  
7.698  
7.678  
7.623  
7.618  
7.615  
7.612  
7.610  
7.608  
7.603  
7.599  
7.565  
7.546  
7.502  
7.498  
7.493  
7.485  
7.481  
7.478  
7.464  
7.461  
7.447  
7.444  
7.440  
7.426  
7.423  
7.398  
7.393  
7.386  
7.384  
7.381  
7.376  
7.372  
7.370  
7.366  
7.358  
7.354  
7.350  
7.343  
7.339  
7.335  
7.326  
7.322  
7.319  
7.310  
7.305  
7.302  
7.288  
7.226  
7.204  
7.201  
7.186  
7.183  
7.155  
7.075  
7.054  
6.928  
6.925  
6.909  
6.906  
6.890  
6.888  
5.428  
5.279  
0.000

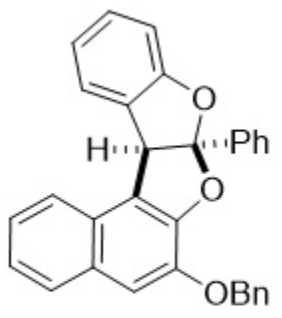

400 MHz, CDCl<sub>3</sub>

7

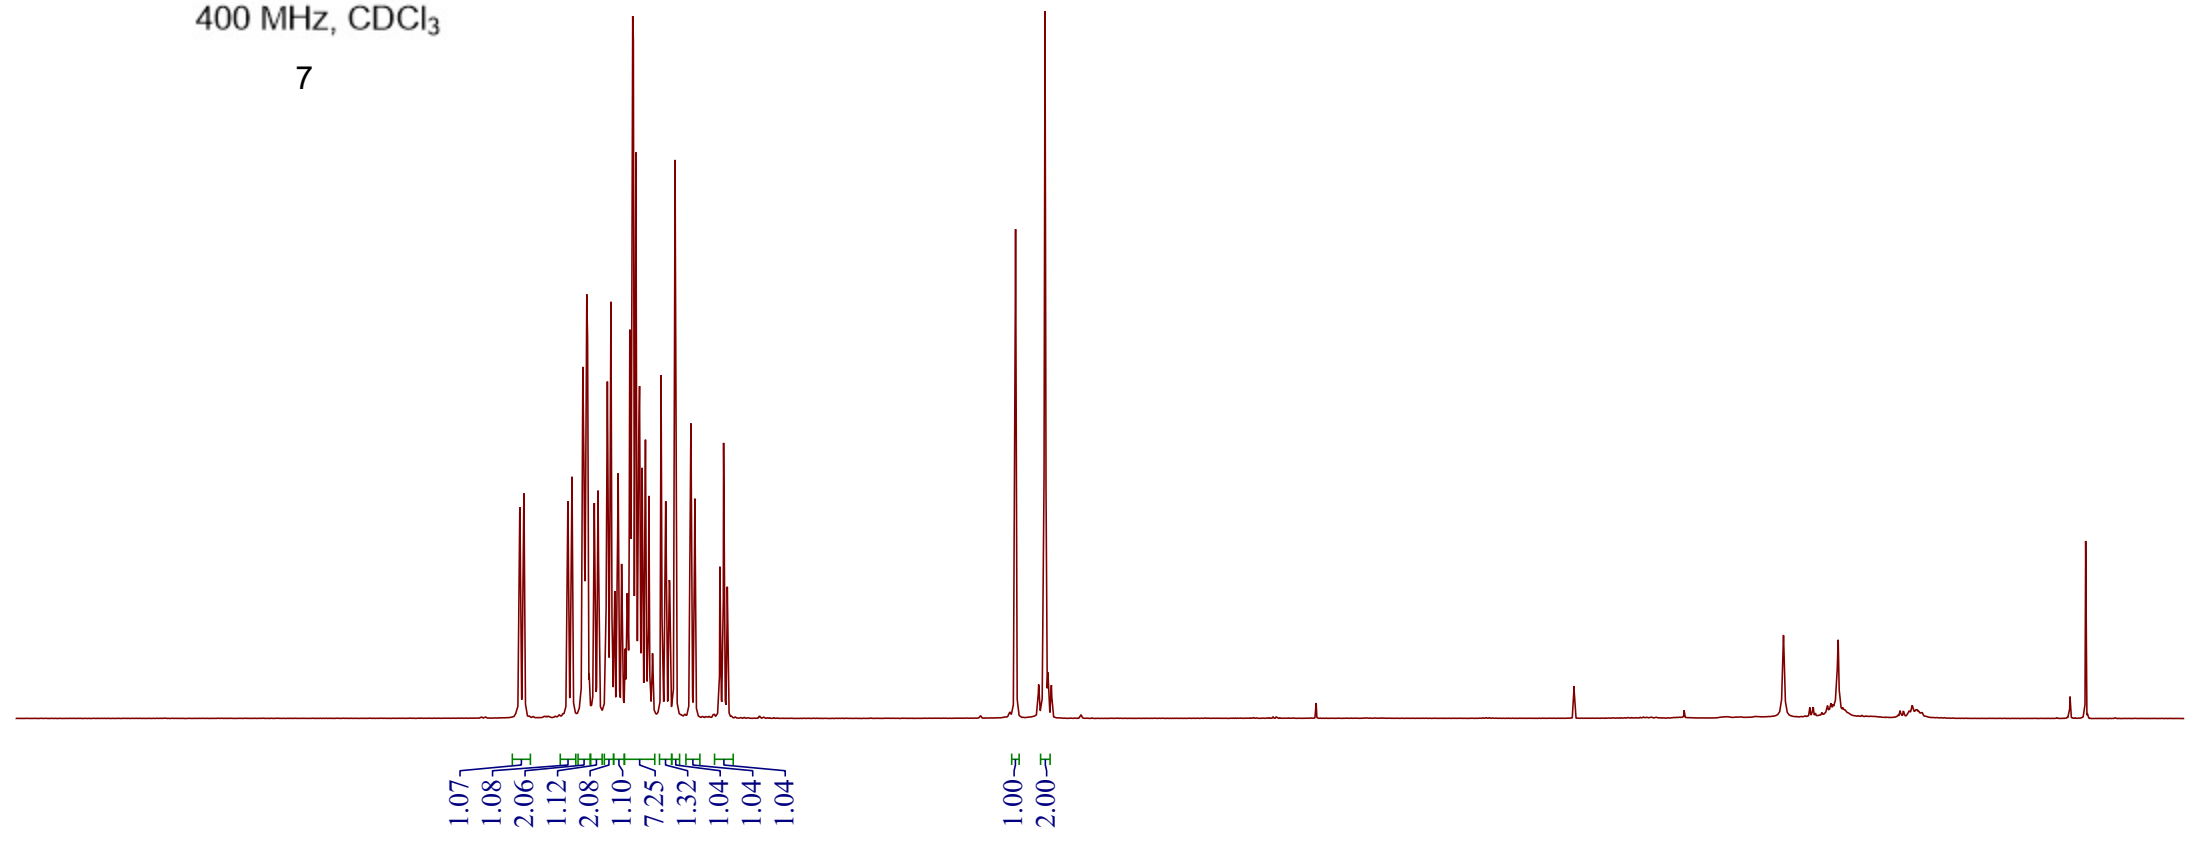

10.0  
9.5  
9.0  
8.5  
8.0  
7.5  
7.0  
6.5  
6.0  
5.5  
5.0  
4.5  
4.0  
3.5  
3.0  
2.5  
2.0  
1.5  
1.0  
0.5  
0.0  
-0.5

f1 (ppm)  
S84

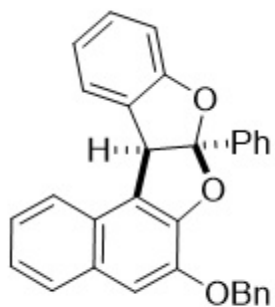

100 MHz, CDCl<sub>3</sub>

7

158.337  
147.820  
144.501  
139.482  
136.566  
131.125  
129.303  
129.053  
128.634  
128.617  
128.026  
127.963  
127.458  
127.269  
125.397  
125.106  
125.083  
125.038  
124.135  
122.873  
122.640  
122.055  
120.857  
110.612  
109.901

70.848

57.719

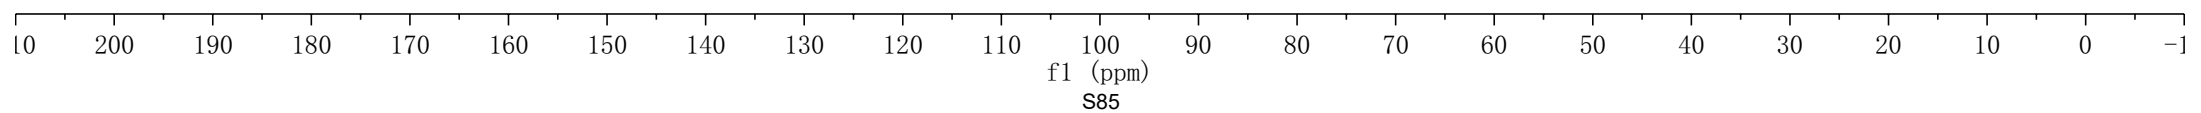

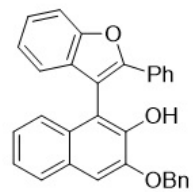

400 MHz, CDCl<sub>3</sub>  
8

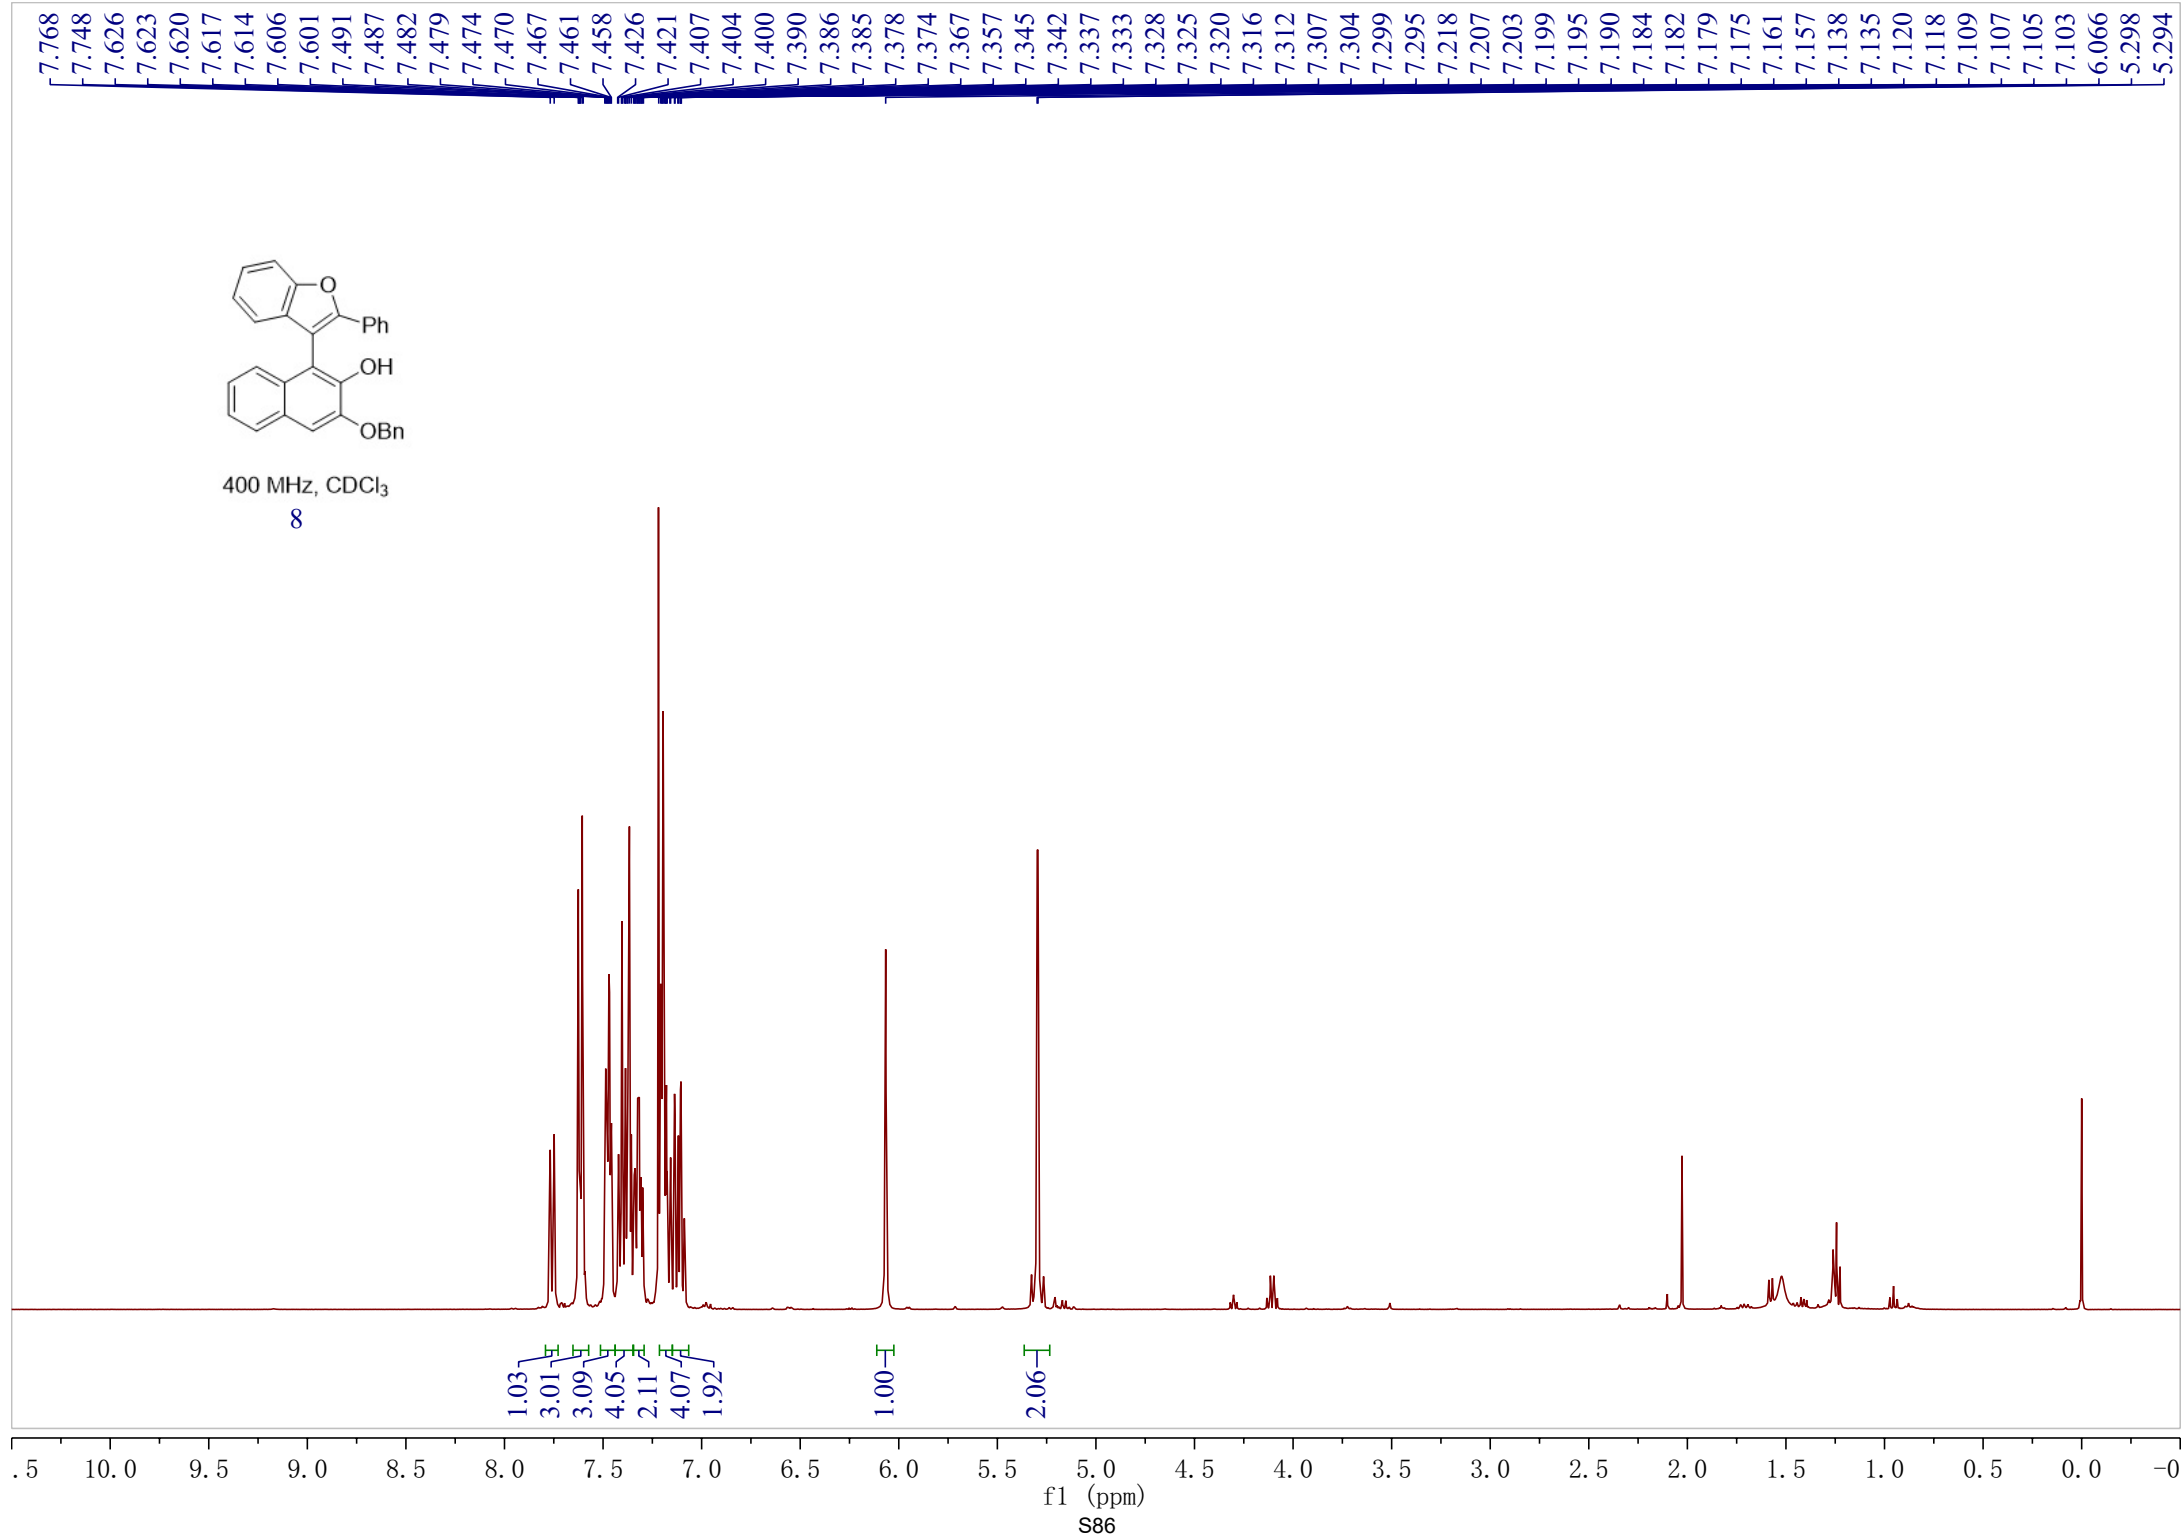



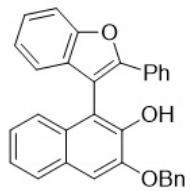

100 MHz, CDCl<sub>3</sub>

8

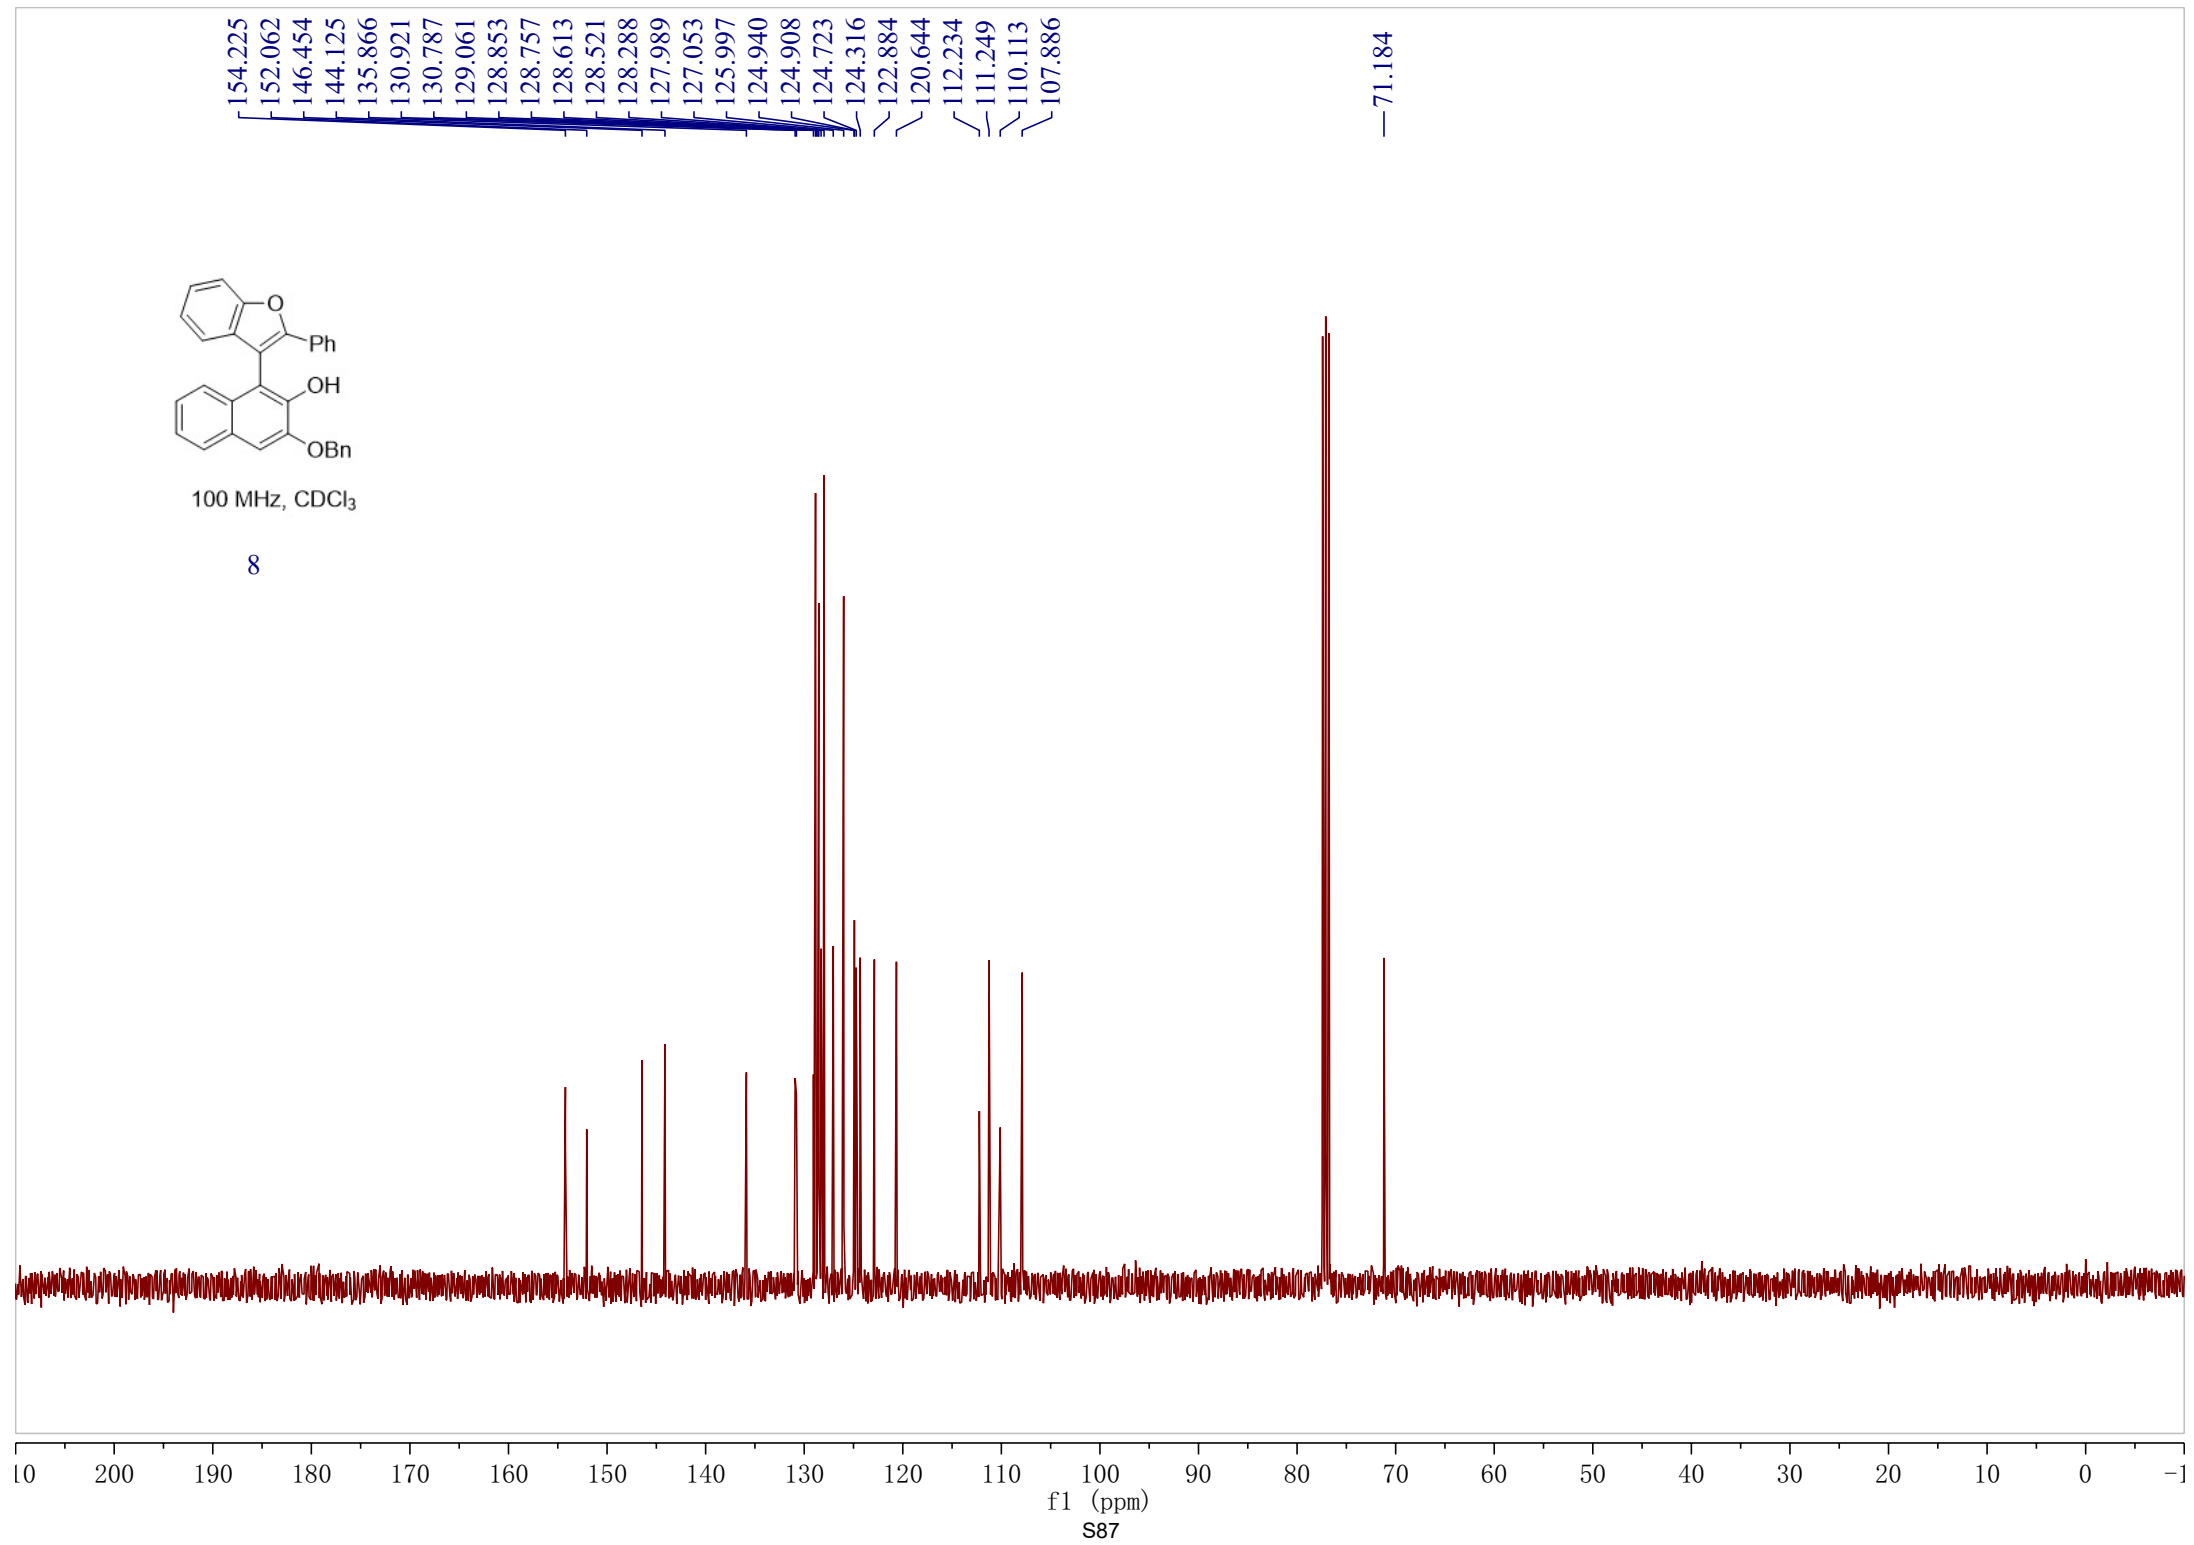

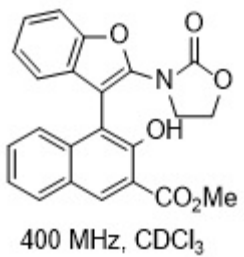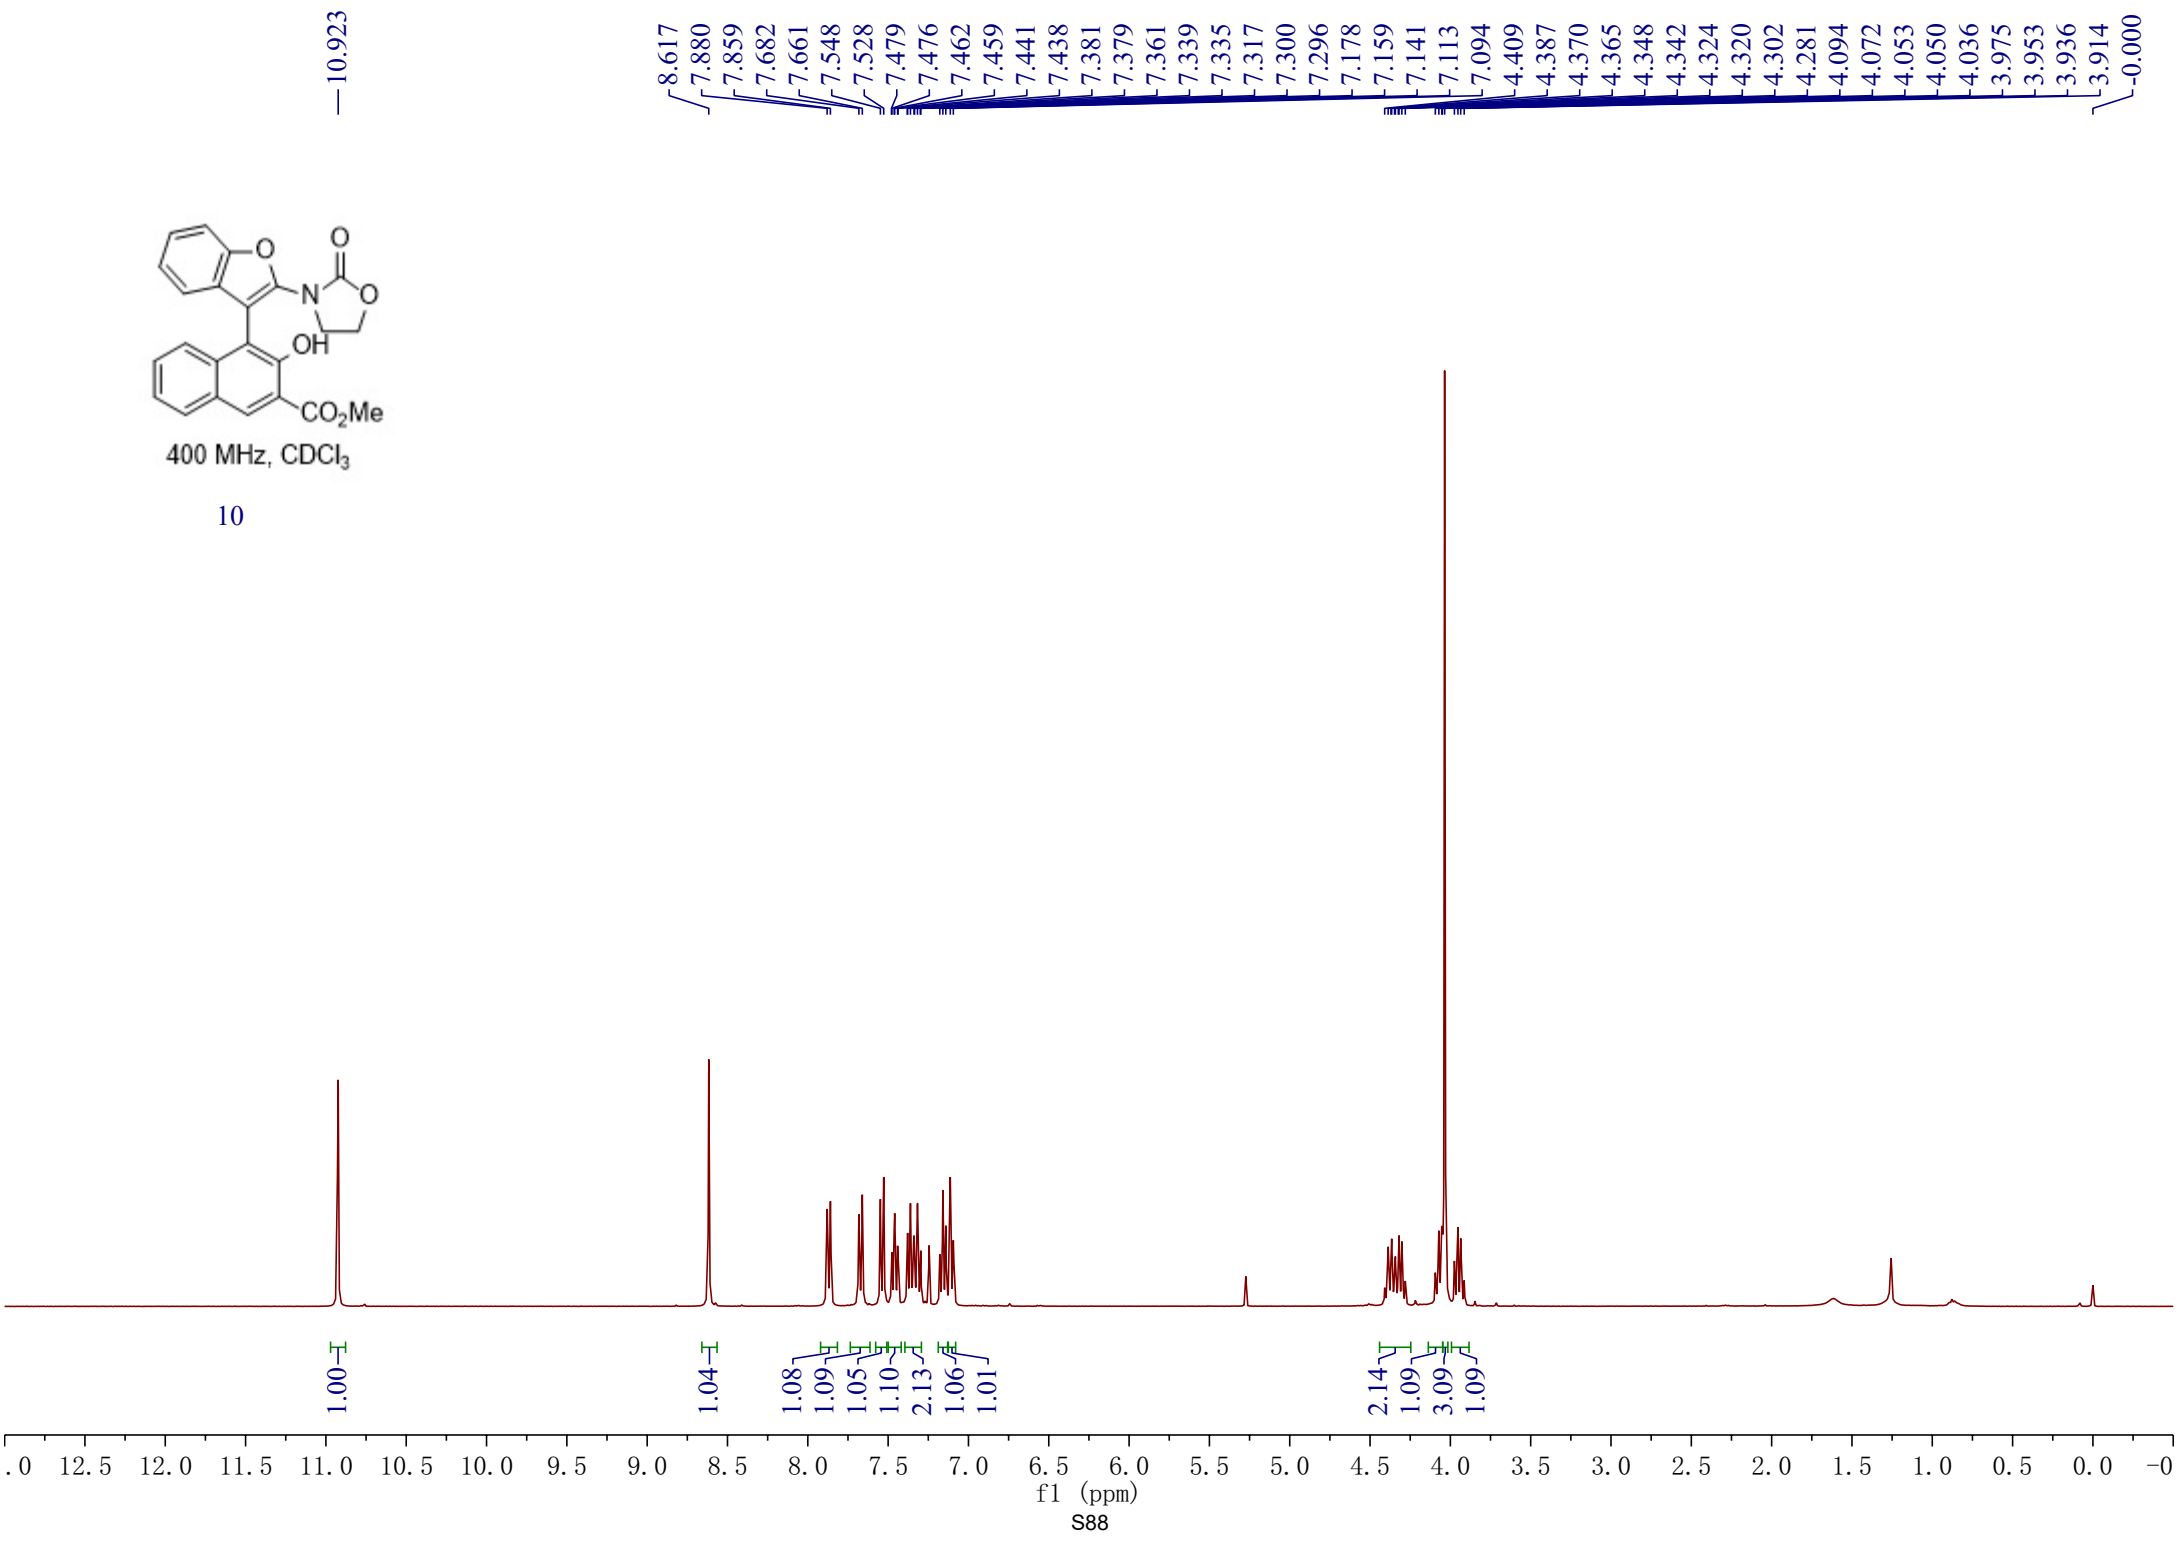

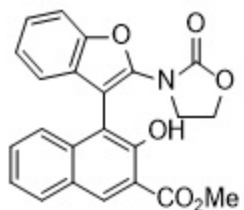

100 MHz, CDCl<sub>3</sub>

10

— 170.739

154.747

154.084

151.962

— 144.481

136.764

133.412

129.856

129.291

127.122

125.247

124.665

124.378

123.172

120.794

113.825

112.001

111.408

106.333

105.420

— 63.032

— 52.921

— 45.404

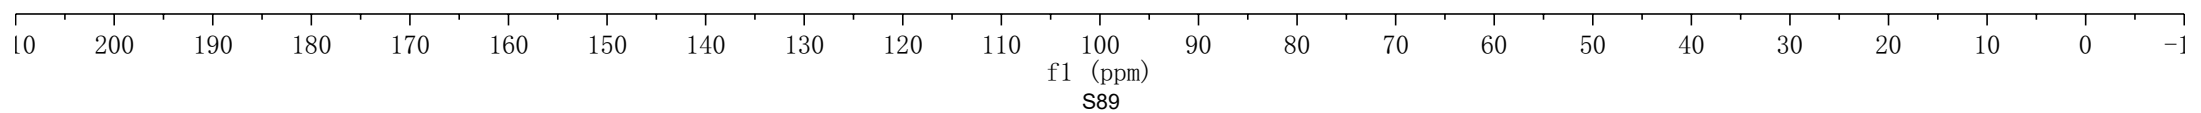

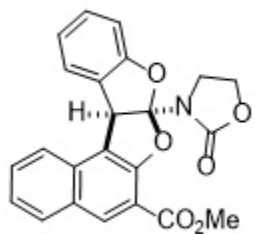

11

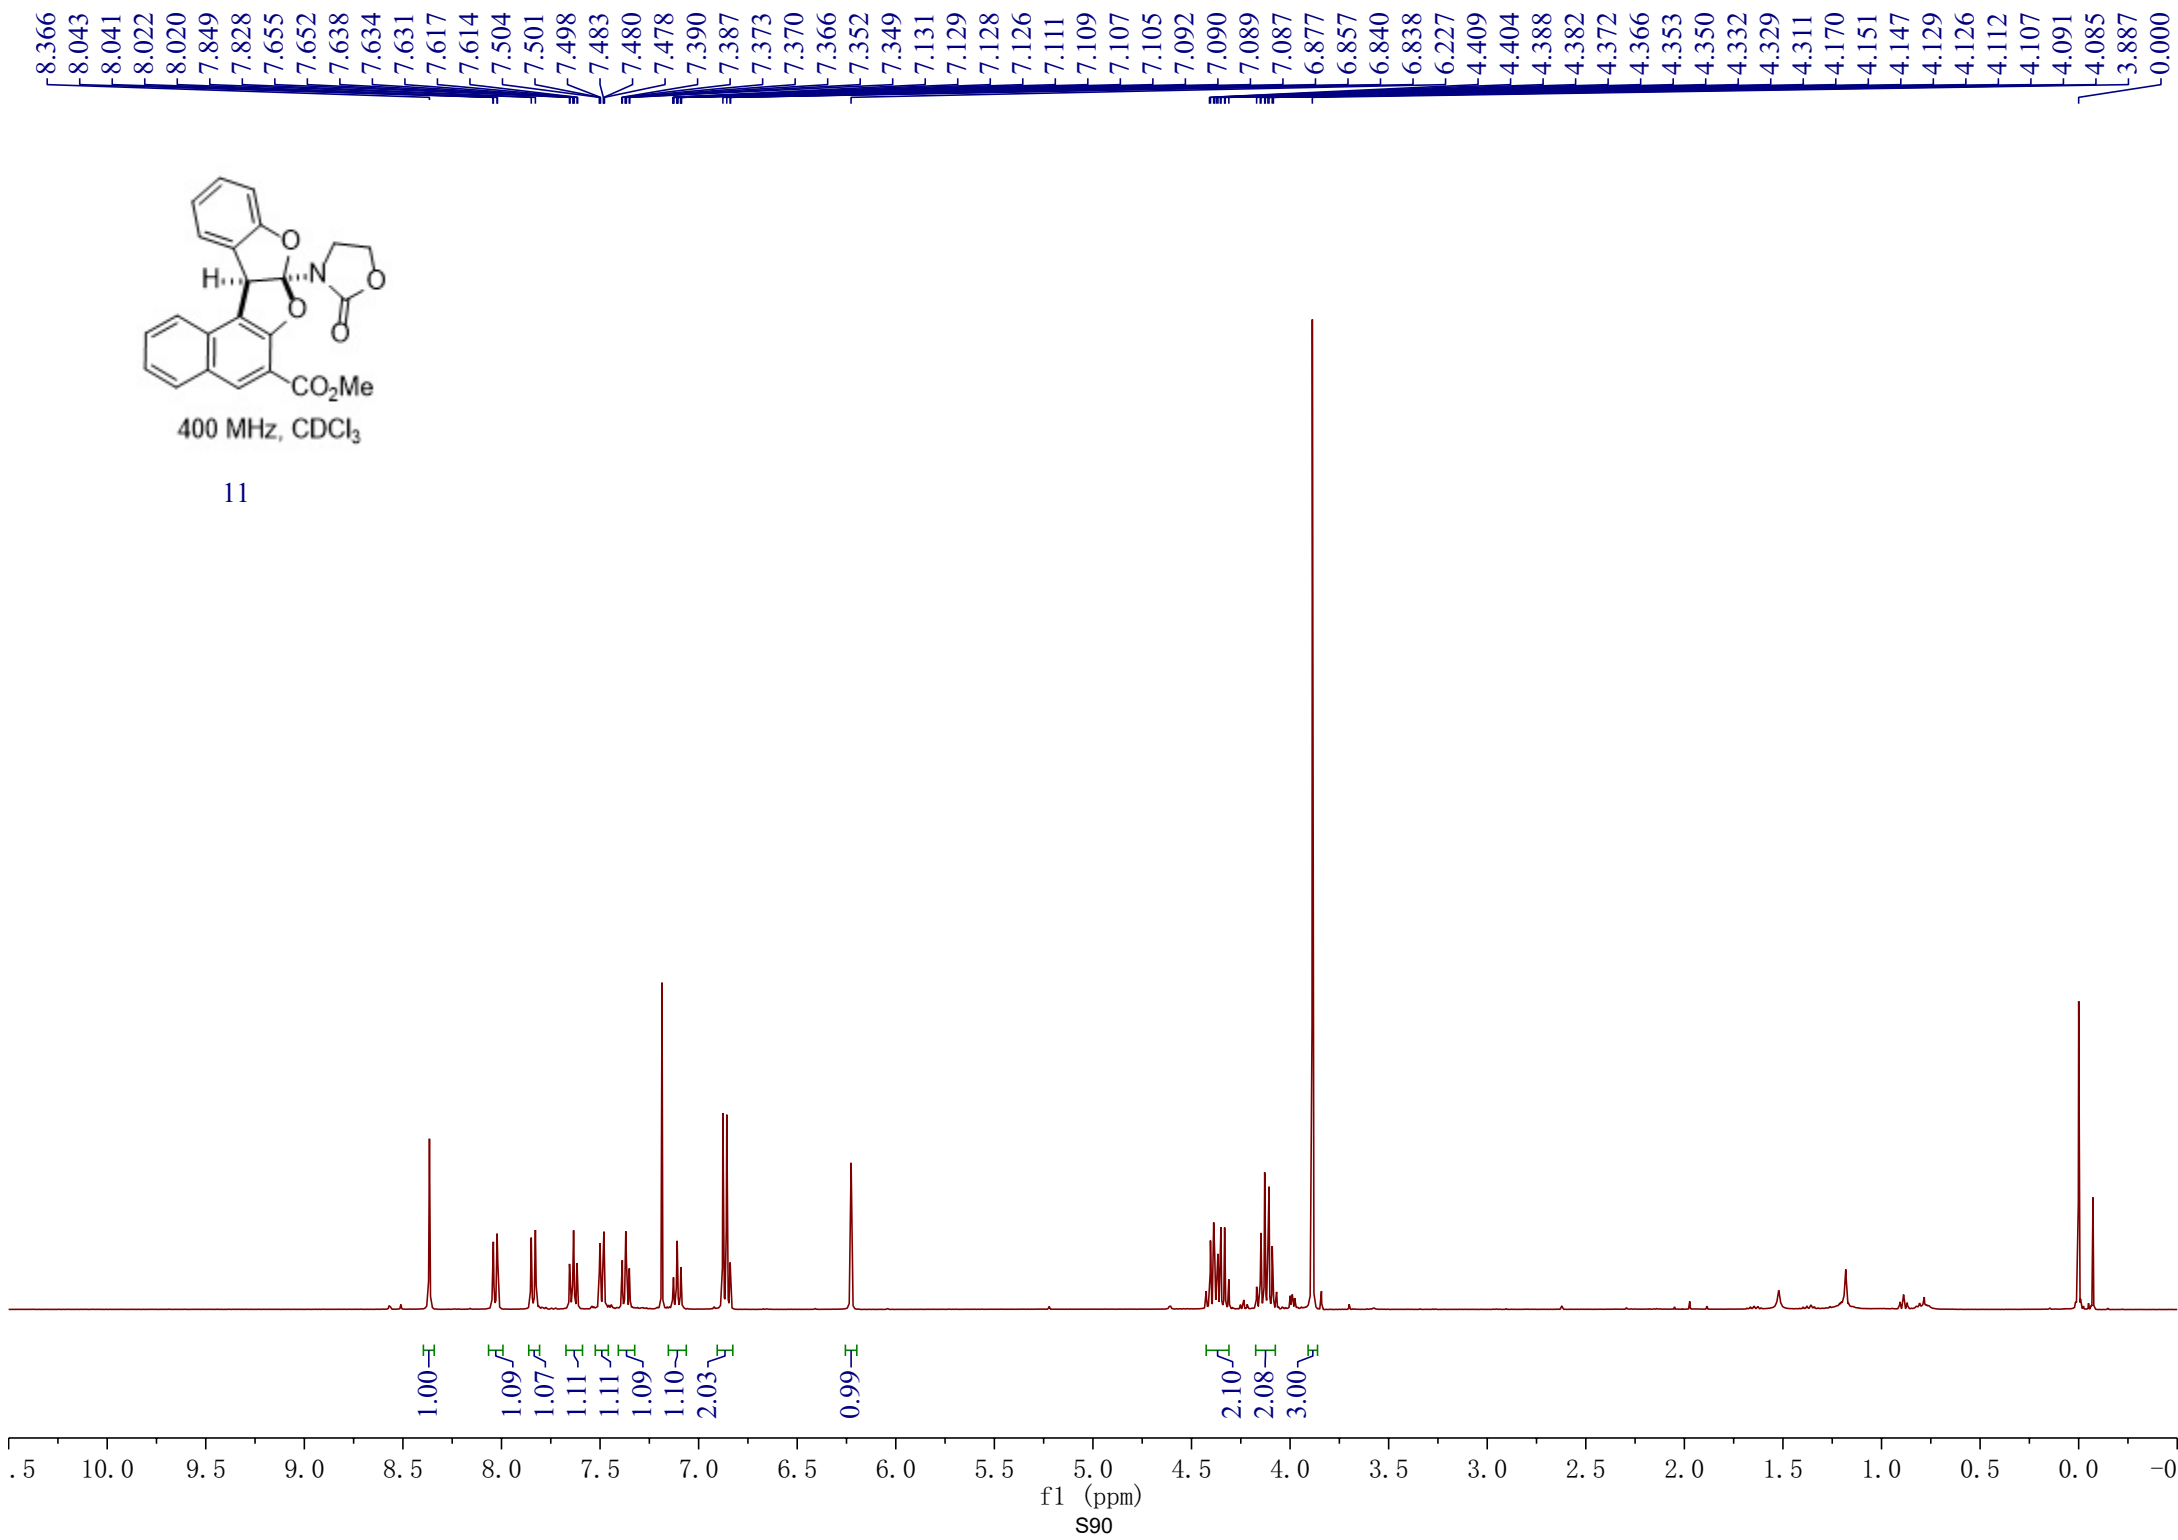

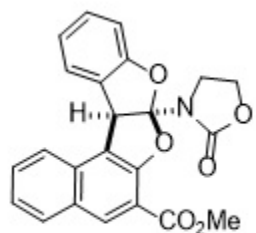

100 MHz, CDCl<sub>3</sub>

11

164.874  
156.684  
155.699  
152.601  
133.458  
132.003  
130.441  
129.811  
129.390  
129.104  
126.566  
125.158  
125.017  
124.821  
123.077  
122.511  
121.784  
114.822  
110.386

62.786  
52.336  
50.954  
43.323

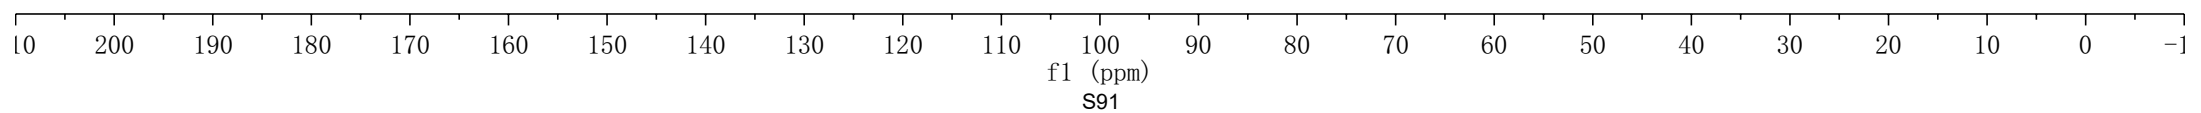

Supplement: d3ob00893b1.pdf [file d3ob00893b1.pdf]
